# Supplementary material for: Structural analysis of five-coordinate aluminium(salen) complexes and its relationship to their catalytic activity
Source: Royal Society of Chemistry journal article supplement (doi:10.1039/d0dt03598j), 2020-12-15
Supplement: d0dt03598j1.pdf [file d0dt03598j1.pdf]

# Supporting Information

## Structural Analysis of Five-Coordinate Aluminum(Salen) Complexes and its Relationship to their Catalytic Activity

*Heather Fish, Sam Hart, Katie J. Lamb, Michael North,\* Sophie C. Z. Quek, Adrian C. Whitwood, Barnaby Woods and Xiao Wu*

Department of Chemistry, University of York, Heslington, YO10 5DD.

Email: Michael.north@york.ac.uk

### Table of Contents

|                                                                                                                                                    |     |
|----------------------------------------------------------------------------------------------------------------------------------------------------|-----|
| X-ray data                                                                                                                                         | S4  |
| Crystal data and structure refinement for <b>1</b> .HCl.                                                                                           | S4  |
| Fractional Atomic Coordinates ( $\times 10^4$ ) and Equivalent Isotropic Displacement Parameters ( $\text{\AA}^2 \times 10^3$ ) for <b>1</b> .HCl. | S5  |
| Anisotropic Displacement Parameters ( $\text{\AA}^2 \times 10^3$ ) for <b>1</b> .HCl.                                                              | S7  |
| Bond Lengths for <b>1</b> .HCl.                                                                                                                    | S9  |
| Bond Angles for <b>1</b> .HCl.                                                                                                                     | S11 |
| Torsion Angles for <b>1</b> .HCl.                                                                                                                  | S13 |
| Hydrogen Atom Coordinates ( $\text{\AA} \times 10^4$ ) and Isotropic Displacement Parameters ( $\text{\AA}^2 \times 10^3$ ) for <b>1</b> .HCl.     | S16 |
| Atomic Occupancy for <b>1</b> .HCl.                                                                                                                | S18 |
| Solvent masks information for <b>1</b> .HCl.                                                                                                       | S18 |
| NMR spectra                                                                                                                                        | S19 |
| Compound <b>1</b> $^1\text{H}$ NMR spectrum                                                                                                        | S19 |
| VT NMR spectra (298-328 K) of <b>1</b> (7.6–7.4 ppm region)                                                                                        | S20 |
| VT NMR spectra (298-328 K) of <b>1</b> (7.25–6.81 ppm region)                                                                                      | S21 |
| VT NMR spectra (298-328 K) of <b>1</b> (1.55–1.05 ppm region)                                                                                      | S22 |
| DOSY spectrum and analysis                                                                                                                         | S23 |
| Compound <b>1</b> .TFA $^1\text{H}$ NMR spectrum                                                                                                   | S25 |
| VT NMR spectra (233-328 K) of <b>1</b> .TFA (6.7–8.3 ppm region)                                                                                   | S26 |
| VT NMR spectra (233-328 K) of <b>1</b> .TFA (6.0–2.9 ppm region)                                                                                   | S27 |

|                                                                                                                                                                             |     |
|-----------------------------------------------------------------------------------------------------------------------------------------------------------------------------|-----|
| VT NMR spectra (233-328 K) of <b>1</b> .TFA (2.9–0.2 ppm region) emphasising the changes in the signals in this region which do not correspond to <i>tert</i> -butyl groups | S28 |
| VT NMR spectra (233-328 K) of <b>1</b> .TFA (1.7–0.8 ppm region) emphasising the changes in the signals in this region correspond to <i>tert</i> -butyl groups              | S29 |
| Compound <b>1</b> .TFA <sup>13</sup> C NMR spectrum                                                                                                                         | S30 |
| Compound <b>1</b> .TFA <sup>19</sup> F NMR spectrum                                                                                                                         | S31 |
| Compound <b>8</b> <sup>1</sup> H NMR spectrum                                                                                                                               | S32 |
| VT NMR spectra (218-298 K) of <b>8</b> (6.7–8.3 ppm region)                                                                                                                 | S33 |
| VT NMR spectra (218-298 K) of <b>8</b> (4.5–2.0 ppm region)                                                                                                                 | S34 |
| VT NMR spectra (218-298 K) of <b>8</b> (3.0–0.5 ppm region) emphasising the changes in the signals in this region which do not correspond to <i>tert</i> -butyl groups      | S35 |
| VT NMR spectra (218-298 K) of <b>8</b> (3.0–0.5 ppm region) emphasising the changes in the <i>tert</i> -butyl signals                                                       | S36 |
| Compound <b>8</b> <sup>13</sup> C NMR spectrum                                                                                                                              | S37 |
| Compound <b>8</b> <sup>19</sup> F NMR spectrum                                                                                                                              | S38 |
| Compound <b>9</b> <sup>1</sup> H NMR spectrum                                                                                                                               | S39 |
| Compound <b>9</b> <sup>13</sup> C NMR spectrum                                                                                                                              | S40 |
| <b>11</b> From Al( <sup>t</sup> Bu-salen)Cl and dioxane <sup>1</sup> H NMR spectrum                                                                                         | S41 |
| <b>11</b> From Al( <sup>t</sup> Bu-salen)Cl and dioxane <sup>13</sup> C NMR spectrum                                                                                        | S42 |
| <b>10+11</b> From HCl addition to <b>1</b> <sup>1</sup> H NMR spectrum                                                                                                      | S43 |
| <b>10+11</b> From Al( <sup>t</sup> Bu-salen)Cl and dioxane <sup>1</sup> H NMR spectrum                                                                                      | S44 |
| NOESY spectrum of <b>10+11</b> from Al( <sup>t</sup> Bu-salen)Cl and dioxane (on-diagonal peaks above 3 pm have been assigned to <b>10</b> or <b>11</b> )                   | S45 |
| VT NMR spectra (218-328 K) of <b>10+11</b> from Al( <sup>t</sup> Bu-salen)Cl and dioxane (6.5-9.5 ppm region)                                                               | S46 |
| VT NMR spectra (218-328 K) of <b>10+11</b> from Al( <sup>t</sup> Bu-salen)Cl and dioxane (6.5-3.0 ppm region)                                                               | S47 |
| VT NMR spectra (218-328 K) of <b>10+11</b> from Al( <sup>t</sup> Bu-salen)Cl and dioxane (3.0-0 ppm region emphasising changes in non- <i>tert</i> -butyl peaks)            | S48 |
| VT NMR spectra (218-328 K) of <b>10+11</b> from Al( <sup>t</sup> Bu-salen)Cl and dioxane (3.0-0 ppm region emphasising changes in <i>tert</i> -butyl peaks)                 | S49 |
| Al( <sup>t</sup> Bu-salen)Cl <sup>1</sup> H NMR spectrum                                                                                                                    | S50 |
| [Al( <sup>t</sup> Bu-salen)(dioxane) <sub>2</sub> ] <sup>+</sup> Cl <sup>-</sup> <sup>1</sup> H NMR spectrum                                                                | S51 |

|                                                                                                                               |      |
|-------------------------------------------------------------------------------------------------------------------------------|------|
| <sup>1</sup> H NMR spectra of the addition of 1,2-epoxyhexane to complex <b>1</b> in CDCl <sub>3</sub><br>(full spectra)      | S52  |
| <sup>1</sup> H NMR spectra of the addition of 1,2-epoxyhexane to complex <b>1</b> in CDCl <sub>3</sub><br>(7.7–6.7 ppm)       | S53  |
| <sup>1</sup> H NMR spectra of the addition of 1,2-epoxyhexane to complex <b>1</b> in CDCl <sub>3</sub><br>(3.5–2.0 ppm)       | S54  |
| <sup>1</sup> H NMR spectra of the addition of 1,2-epoxyhexane to (tBu-salen)AlCl in<br>CDCl <sub>3</sub> (full spectra)       | S55  |
| <sup>1</sup> H NMR spectra of the addition of 1,2-epoxyhexane to (tBu-salen)AlCl in<br>CDCl <sub>3</sub> (9.0–6.5 ppm)        | S56  |
| <sup>1</sup> H NMR spectra of the addition of 1,2-epoxyhexane to (tBu-salen)AlCl in<br>CDCl <sub>3</sub> (4.5–2.2 ppm)        | S57  |
| <sup>1</sup> H NMR spectra of the addition of 1,2-epoxyhexane to complex <b>1</b> .TFA in<br>CDCl <sub>3</sub> (full spectra) | S58  |
| <sup>1</sup> H NMR spectra of the addition of 1,2-epoxyhexane to complex <b>1</b> .TFA in<br>CDCl <sub>3</sub> (9.0–6.5 ppm)  | S59  |
| <sup>1</sup> H NMR spectra of the addition of 1,2-epoxyhexane to complex <b>1</b> .TFA in<br>CDCl <sub>3</sub> (4.5–2.2 ppm)  | S60  |
| <sup>13</sup> C NMR spectrum of the addition of 1,2-epoxyhexane to complex <b>1</b> .TFA in<br>CDCl <sub>3</sub>              | S61  |
| <sup>1</sup> H NMR spectra of the addition of 1,2-epoxyhexane to complex <b>9</b> in CDCl <sub>3</sub><br>(full spectra)      | S62  |
| <sup>1</sup> H NMR spectra of the addition of 1,2-epoxyhexane to complex <b>9</b> in CDCl <sub>3</sub><br>(8.5–6.5 ppm)       | S63  |
| <sup>1</sup> H NMR spectra of the addition of 1,2-epoxyhexane to complex <b>9</b> in CDCl <sub>3</sub><br>(4.5–2.0 ppm)       | S64  |
| Line shape analysis                                                                                                           | S65  |
| <b>1</b> .TFA                                                                                                                 | S66  |
| <b>8</b>                                                                                                                      | S76  |
| 1:2.5 mixture of <b>10</b> and <b>11</b>                                                                                      | S88  |
| NMR spectra of styrene carbonate                                                                                              | S99  |
| <sup>1</sup> H NMR spectrum of reaction mixture                                                                               | S99  |
| <sup>1</sup> H NMR spectrum of purified styrene carbonate                                                                     | S100 |
| <sup>13</sup> C NMR spectrum of purified styrene carbonate                                                                    | S101 |
| Reference                                                                                                                     | S102 |

## X-ray data

### Crystal data and structure refinement for 1.HCl.

|                                             |                                                                                        |
|---------------------------------------------|----------------------------------------------------------------------------------------|
| Identification code                         | mn1405                                                                                 |
| Empirical formula                           | C <sub>72</sub> H <sub>107.62</sub> Al <sub>2</sub> ClN <sub>4</sub> O <sub>6.31</sub> |
| Formula weight                              | 1219.61                                                                                |
| Temperature/K                               | 110.1(2)                                                                               |
| Crystal system                              | orthorhombic                                                                           |
| Space group                                 | P2 <sub>1</sub> 2 <sub>1</sub> 2 <sub>1</sub>                                          |
| a/Å                                         | 14.4538(4)                                                                             |
| b/Å                                         | 19.9792(4)                                                                             |
| c/Å                                         | 28.2756(6)                                                                             |
| α/°                                         | 90                                                                                     |
| β/°                                         | 90                                                                                     |
| γ/°                                         | 90                                                                                     |
| Volume/Å <sup>3</sup>                       | 8165.3(3)                                                                              |
| Z                                           | 4                                                                                      |
| ρ <sub>calc</sub> /g/cm <sup>3</sup>        | 0.992                                                                                  |
| μ/mm <sup>-1</sup>                          | 0.113                                                                                  |
| F(000)                                      | 2644.0                                                                                 |
| Crystal size/mm <sup>3</sup>                | 0.3377 × 0.253 × 0.1485                                                                |
| Radiation                                   | Mo Kα (λ = 0.71073)                                                                    |
| 2θ range for data collection/°              | 5.734 to 64.454                                                                        |
| Index ranges                                | -20 ≤ h ≤ 18, -27 ≤ k ≤ 29, -32 ≤ l ≤ 42                                               |
| Reflections collected                       | 37091                                                                                  |
| Independent reflections                     | 22588 [R <sub>int</sub> = 0.0321, R <sub>sigma</sub> = 0.0533]                         |
| Data/restraints/parameters                  | 22588/0/808                                                                            |
| Goodness-of-fit on F <sup>2</sup>           | 1.020                                                                                  |
| Final R indexes [I ≥ 2σ (I)]                | R <sub>1</sub> = 0.0470, wR <sub>2</sub> = 0.1226                                      |
| Final R indexes [all data]                  | R <sub>1</sub> = 0.0607, wR <sub>2</sub> = 0.1322                                      |
| Largest diff. peak/hole / e Å <sup>-3</sup> | 0.77/-0.30                                                                             |
| Flack parameter                             | 0.14(3)                                                                                |

Data collected, solved and refined by Sam Hart and Adrian C Whitwood

**Fractional Atomic Coordinates ( $\times 10^4$ ) and Equivalent Isotropic Displacement Parameters ( $\text{\AA}^2 \times 10^3$ ) for 1.HCl.  $U_{\text{eq}}$  is defined as 1/3 of of the trace of the orthogonalised  $U_{ij}$  tensor.**

| Atom | x          | y          | z          | $U(\text{eq})$ |
|------|------------|------------|------------|----------------|
| Cl1  | 3518.2(6)  | 6129.1(4)  | 3929.8(2)  | 36.29(16)      |
| Al1  | 3978.1(5)  | 4274.8(3)  | 3106.0(2)  | 15.61(13)      |
| Al2  | 4802.6(4)  | 2558.2(3)  | 2961.5(2)  | 14.83(12)      |
| C1   | 5759.1(15) | 4893.0(11) | 3192.5(8)  | 18.4(4)        |
| C2   | 6591.9(16) | 5082.6(12) | 2953.3(9)  | 20.7(4)        |
| C3   | 7348.5(17) | 5242.0(13) | 3230.3(10) | 25.0(5)        |
| C4   | 7370.4(17) | 5230.6(13) | 3732.0(10) | 25.8(5)        |
| C5   | 6558.9(17) | 5045.9(13) | 3950.2(9)  | 25.2(5)        |
| C6   | 5765.7(16) | 4876.8(12) | 3694.7(9)  | 21.0(4)        |
| C7   | 4966.6(16) | 4671.0(12) | 3964.6(9)  | 21.5(5)        |
| C8   | 6643.3(17) | 5059.7(13) | 2413.1(9)  | 23.9(5)        |
| C9   | 5924.4(18) | 5520.2(13) | 2191.1(9)  | 25.4(5)        |
| C10  | 6488(2)    | 4330.5(14) | 2247.6(10) | 33.3(6)        |
| C11  | 7595.0(19) | 5273.9(15) | 2234.7(10) | 31.6(6)        |
| C12  | 8268.6(18) | 5387.2(14) | 3997.6(10) | 28.9(6)        |
| C13  | 9037(2)    | 4927.0(17) | 3829.5(14) | 44.8(8)        |
| C14  | 8540(2)    | 6118.3(16) | 3912.0(12) | 38.9(7)        |
| C15  | 8145(2)    | 5279(2)    | 4533.7(12) | 47.1(9)        |
| C16  | 3442.0(15) | 4242.2(12) | 4104.1(8)  | 18.5(4)        |
| C17  | 3668.1(19) | 4116.8(14) | 4623.6(8)  | 25.8(5)        |
| C18  | 2793(2)    | 3907.0(16) | 4895.3(9)  | 32.0(6)        |
| C19  | 2332.5(19) | 3300.6(14) | 4666.6(9)  | 27.4(5)        |
| C20  | 2105.8(17) | 3422.9(13) | 4145.3(8)  | 22.3(5)        |
| C21  | 2987.2(16) | 3621.8(11) | 3882.7(8)  | 18.1(4)        |
| C22  | 2134.7(15) | 3677.2(11) | 3147.2(8)  | 18.9(4)        |
| C23  | 1967.3(15) | 3849.8(11) | 2658.9(8)  | 18.6(4)        |
| C24  | 1072.9(16) | 3716.4(11) | 2483.7(9)  | 19.9(4)        |
| C25  | 830.3(16)  | 3865.7(11) | 2023.5(9)  | 20.5(4)        |
| C26  | 1512.6(16) | 4193.9(12) | 1748.3(8)  | 20.8(4)        |
| C27  | 2394.5(16) | 4355.8(11) | 1903.8(8)  | 18.9(4)        |
| C28  | 2649.3(15) | 4148.9(11) | 2370.1(8)  | 17.4(4)        |
| C29  | -112.5(16) | 3702.1(12) | 1808.2(9)  | 23.1(5)        |
| C30  | -812.9(18) | 3482.3(14) | 2185.2(11) | 30.8(6)        |
| C31  | 10(2)      | 3137.9(15) | 1448.7(12) | 36.1(6)        |
| C32  | -513.6(18) | 4316.1(14) | 1556.4(11) | 32.0(6)        |
| C33  | 3057.2(16) | 4782.3(12) | 1604.8(8)  | 21.0(4)        |
| C34  | 2608(2)    | 5002.1(17) | 1135.6(10) | 33.3(6)        |
| C35  | 3296.5(18) | 5429.6(12) | 1880.8(10) | 25.7(5)        |
| C36  | 3955.9(18) | 4405.1(13) | 1486.8(9)  | 26.5(5)        |
| C37  | 3668.0(16) | 1899.4(11) | 3651.0(8)  | 17.1(4)        |
| C38  | 3631.0(17) | 1622.3(12) | 4116.2(8)  | 20.6(4)        |
| C39  | 2783.1(19) | 1398.6(13) | 4277.1(8)  | 25.1(5)        |
| C40  | 1953.0(18) | 1419.8(12) | 4017.3(9)  | 23.6(5)        |
| C41  | 2008.7(17) | 1689.0(12) | 3569.5(9)  | 22.0(5)        |

**Fractional Atomic Coordinates ( $\times 10^4$ ) and Equivalent Isotropic Displacement Parameters ( $\text{\AA}^2 \times 10^3$ ) for 1.HCl.  $U_{\text{eq}}$  is defined as 1/3 of of the trace of the orthogonalised  $U_{ij}$  tensor.**

| Atom | x           | y          | z          | U(eq)    |
|------|-------------|------------|------------|----------|
| C42  | 2842.6(16)  | 1940.4(12) | 3385.7(8)  | 18.9(4)  |
| C43  | 2837.8(16)  | 2178.3(11) | 2903.3(8)  | 18.3(4)  |
| C44  | 4501.6(18)  | 1578.1(13) | 4423.7(8)  | 23.4(5)  |
| C45  | 4876(2)     | 2285.5(14) | 4513.7(10) | 29.9(6)  |
| C46  | 5233(2)     | 1141.3(14) | 4181.1(9)  | 28.6(5)  |
| C47  | 4309(2)     | 1262(2)    | 4907.8(10) | 43.1(8)  |
| C48  | 1059(2)     | 1156.8(15) | 4237.9(10) | 31.6(6)  |
| C49  | 1200(3)     | 481(2)     | 4464.8(13) | 51.2(9)  |
| C50  | 721(3)      | 1681(2)    | 4604.7(14) | 57.6(11) |
| C51  | 291(2)      | 1085.0(16) | 3866.8(12) | 36.0(6)  |
| C52  | 3534.9(15)  | 2571.2(12) | 2180.9(7)  | 17.9(4)  |
| C53  | 2644.5(16)  | 2435.0(13) | 1905.1(8)  | 21.1(4)  |
| C54  | 2811.1(17)  | 2609.7(14) | 1384.7(8)  | 24.5(5)  |
| C55  | 3644.2(18)  | 2236.4(15) | 1180.6(8)  | 28.4(6)  |
| C56  | 4521.5(17)  | 2349.4(15) | 1472.2(8)  | 26.4(5)  |
| C57  | 4333.3(15)  | 2153.8(12) | 1983.9(8)  | 18.7(4)  |
| C58  | 5921.1(15)  | 2015.0(12) | 2186.8(8)  | 18.6(4)  |
| C59  | 6748.3(15)  | 2023.4(12) | 2462.1(8)  | 17.1(4)  |
| C60  | 7538.0(16)  | 1725.7(12) | 2260.4(8)  | 19.9(4)  |
| C61  | 8361.6(16)  | 1691.8(12) | 2504.9(9)  | 20.1(4)  |
| C62  | 8386.6(15)  | 2012.1(12) | 2950.1(9)  | 20.4(4)  |
| C63  | 7643.3(15)  | 2342.5(11) | 3158.4(8)  | 18.8(4)  |
| C64  | 6772.4(15)  | 2314.1(11) | 2918.8(8)  | 16.8(4)  |
| C65  | 9194.5(16)  | 1295.5(12) | 2319.3(10) | 24.6(5)  |
| C66  | 9151(2)     | 1217(2)    | 1782.3(12) | 46.8(9)  |
| C67  | 10114.8(16) | 1634.8(13) | 2442.2(10) | 26.2(5)  |
| C68  | 9193(2)     | 596.6(14)  | 2558.6(16) | 46.1(9)  |
| C69  | 7745.6(17)  | 2694.9(13) | 3634.8(9)  | 24.5(5)  |
| C70  | 8754(2)     | 2759(2)    | 3788.1(13) | 49.0(9)  |
| C71  | 7199(3)     | 2314(2)    | 4011.3(11) | 54.0(10) |
| C72  | 7375(3)     | 3416.4(16) | 3605.7(14) | 48.1(9)  |
| N1   | 4231.6(13)  | 4408.3(9)  | 3793.3(7)  | 17.2(4)  |
| N2   | 2892.9(13)  | 3782.7(9)  | 3373.3(7)  | 16.6(4)  |
| N3   | 3540.8(13)  | 2429.9(10) | 2692.9(6)  | 16.6(3)  |
| N4   | 5115.2(13)  | 2241.8(10) | 2319.4(7)  | 17.5(4)  |
| O1   | 5015.6(11)  | 4731.1(8)  | 2947.6(6)  | 18.7(3)  |
| O2   | 3504.8(11)  | 4232.8(8)  | 2517.9(5)  | 17.6(3)  |
| O3   | 3243.9(11)  | 5126.5(8)  | 3171.6(6)  | 21.1(3)  |
| O4   | 4687.3(12)  | 3453.1(8)  | 3056.0(6)  | 18.4(3)  |
| O5   | 4469.6(11)  | 2106.8(8)  | 3474.8(6)  | 19.1(3)  |
| O6   | 6011.8(10)  | 2558.4(8)  | 3111.3(6)  | 18.7(3)  |
| O7   | 6789(5)     | 4629(4)    | 889(2)     | 38(2)    |

**Anisotropic Displacement Parameters ( $\text{\AA}^2 \times 10^3$ ) for 1.HCl. The Anisotropic displacement factor exponent takes the form:  $-2\pi^2[h^2a^{*2}U_{11}+2hka^*b^*U_{12}+\dots]$ .**

| Atom | $U_{11}$ | $U_{22}$ | $U_{33}$ | $U_{23}$ | $U_{13}$  | $U_{12}$  |
|------|----------|----------|----------|----------|-----------|-----------|
| C11  | 55.5(4)  | 28.3(3)  | 25.0(3)  | 1.4(3)   | -4.3(3)   | -3.4(3)   |
| Al1  | 15.9(3)  | 15.8(3)  | 15.1(3)  | 1.9(3)   | 2.0(2)    | 0.7(3)    |
| Al2  | 14.8(3)  | 17.3(3)  | 12.4(3)  | 0.3(3)   | 0.1(2)    | 1.9(3)    |
| C1   | 16.9(9)  | 15.7(9)  | 22.7(10) | 3.3(9)   | 3.2(8)    | -0.4(8)   |
| C2   | 21.7(10) | 16.9(9)  | 23.5(10) | 4.5(9)   | 4.1(9)    | 1.1(9)    |
| C3   | 21.7(11) | 22.3(11) | 31.1(12) | 8.2(10)  | 2.6(9)    | -1.4(9)   |
| C4   | 22.1(11) | 23.2(11) | 32.0(12) | 7.1(11)  | -5.6(10)  | -2.1(10)  |
| C5   | 24.6(12) | 27.6(12) | 23.3(11) | 7.1(10)  | -1.2(9)   | -3.5(10)  |
| C6   | 18.4(10) | 21.3(10) | 23.3(10) | 3.6(9)   | 1.1(9)    | -0.1(9)   |
| C7   | 23.0(11) | 20.8(10) | 20.6(10) | 1.0(9)   | 1.8(8)    | 3.6(9)    |
| C8   | 24.3(11) | 23.9(11) | 23.6(11) | 3.1(10)  | 5.7(9)    | -2.3(10)  |
| C9   | 27.4(12) | 26.7(11) | 22.1(10) | 7.2(10)  | -0.4(9)   | -4.3(10)  |
| C10  | 42.4(15) | 28.6(13) | 28.9(12) | -2.7(12) | 11.8(12)  | -0.7(12)  |
| C11  | 25.9(12) | 37.0(14) | 31.9(13) | 5.4(12)  | 12.1(11)  | -0.1(11)  |
| C12  | 20.8(11) | 30.3(13) | 35.6(13) | 11.0(12) | -8.5(10)  | -8.7(10)  |
| C13  | 22.0(13) | 43.6(17) | 69(2)    | 1.4(17)  | -10.7(14) | -4.1(13)  |
| C14  | 31.0(14) | 34.5(14) | 51.1(17) | 14.9(14) | -13.5(13) | -10.3(12) |
| C15  | 37.4(16) | 62(2)    | 42.4(17) | 17.5(17) | -15.8(14) | -17.8(16) |
| C16  | 18.5(10) | 19.2(10) | 17.8(9)  | 0.6(9)   | 5.2(8)    | 0.2(9)    |
| C17  | 30.5(12) | 31.6(12) | 15.3(10) | 3.8(10)  | 4.3(9)    | -1.9(11)  |
| C18  | 38.6(14) | 38.5(14) | 18.9(11) | -2.0(11) | 9.7(10)   | -9.1(13)  |
| C19  | 30.4(13) | 30.1(12) | 21.7(11) | 4.0(11)  | 8.7(10)   | -3.8(11)  |
| C20  | 23.2(11) | 23.8(11) | 20.0(10) | 2.4(9)   | 4.8(9)    | -1.3(10)  |
| C21  | 21.8(10) | 17.1(9)  | 15.5(9)  | 1.7(8)   | 4.1(8)    | 2.5(9)    |
| C22  | 17.9(10) | 17.2(9)  | 21.5(10) | 2.4(9)   | 5.3(8)    | -0.8(8)   |
| C23  | 16.8(10) | 16.9(9)  | 22.1(10) | 2.5(9)   | 2.2(8)    | 0.9(8)    |
| C24  | 17.2(10) | 17.8(10) | 24.6(10) | 2.4(9)   | 1.4(8)    | 1.7(9)    |
| C25  | 19.7(10) | 16.1(9)  | 25.6(11) | -0.1(9)  | -0.8(9)   | 3.3(8)    |
| C26  | 23.4(11) | 17.7(10) | 21.3(10) | 4.3(9)   | -2.1(9)   | 2.6(9)    |
| C27  | 19.2(10) | 17.8(9)  | 19.7(10) | 1.7(9)   | 1.5(8)    | 2.9(8)    |
| C28  | 16.3(9)  | 16.4(9)  | 19.3(10) | -1.6(8)  | 2.1(8)    | 2.3(8)    |
| C29  | 20.7(10) | 18.8(10) | 29.7(12) | 4.1(10)  | -3.8(9)   | -2.6(9)   |
| C30  | 20.6(11) | 30.0(13) | 42.0(15) | 11.6(12) | -4.6(10)  | -3.3(10)  |
| C31  | 36.3(15) | 31.1(13) | 40.9(16) | -3.2(13) | -10.5(12) | -4.1(12)  |
| C32  | 20.5(11) | 31.9(13) | 43.8(15) | 11.6(13) | -5.6(11)  | 0.6(11)   |
| C33  | 20.3(10) | 23.0(11) | 19.6(10) | 6.3(9)   | -1.2(8)   | 1.0(9)    |
| C34  | 29.7(13) | 44.4(16) | 25.9(12) | 17.8(13) | -0.8(10)  | -7.6(12)  |
| C35  | 26.8(11) | 20.5(11) | 29.7(12) | 4.1(10)  | 4.8(10)   | -2.0(10)  |
| C36  | 24.6(11) | 30.2(12) | 24.7(11) | 2.6(10)  | 4.8(10)   | 0.2(11)   |
| C37  | 20.1(10) | 14.1(9)  | 17.0(9)  | -2.9(8)  | 1.6(8)    | -1.1(8)   |
| C38  | 26.0(11) | 19.9(10) | 15.9(9)  | -3.8(9)  | 1.0(9)    | 2.6(9)    |
| C39  | 37.2(13) | 21.6(11) | 16.4(10) | -1.9(9)  | 7.5(9)    | -3.6(11)  |
| C40  | 29.4(12) | 18.9(10) | 22.4(11) | -5.7(9)  | 8.6(9)    | -2.5(10)  |

|     |          |          |          |           |           |           |
|-----|----------|----------|----------|-----------|-----------|-----------|
| C41 | 21.4(11) | 22.4(11) | 22.2(11) | -7.2(9)   | 2.6(9)    | 1.0(9)    |
| C42 | 20.5(10) | 18.2(10) | 17.9(10) | -3.6(9)   | 0.2(8)    | 0.9(9)    |
| C43 | 17.2(9)  | 18.0(9)  | 19.8(10) | -0.1(9)   | -1.0(8)   | 1.5(8)    |
| C44 | 27.9(12) | 26.2(11) | 16.1(10) | 1.2(9)    | 1.8(9)    | 4.6(10)   |
| C45 | 33.7(13) | 29.7(12) | 26.4(12) | -8.8(11)  | -7.7(11)  | 5.1(11)   |
| C46 | 37.3(14) | 26.5(12) | 22.1(11) | 2.2(10)   | -1.7(10)  | 8.9(11)   |
| C47 | 44.6(17) | 64(2)    | 21.0(12) | 13.2(15)  | 0.4(12)   | 6.5(17)   |
| C48 | 31.8(13) | 32.4(13) | 30.5(13) | -5.7(12)  | 10.6(11)  | -6.2(12)  |
| C49 | 54(2)    | 59(2)    | 40.3(17) | 19.9(17)  | -8.5(15)  | -28.6(18) |
| C50 | 52(2)    | 68(2)    | 53(2)    | -26(2)    | 34.5(17)  | -19.4(19) |
| C51 | 25.4(13) | 35.9(14) | 46.8(16) | -0.8(14)  | 8.3(12)   | -3.9(12)  |
| C52 | 19.1(9)  | 21.2(10) | 13.3(8)  | -1.1(8)   | -1.6(7)   | 3.0(9)    |
| C53 | 20.2(10) | 24.3(11) | 18.8(9)  | 1.4(9)    | -3.8(8)   | 1.5(9)    |
| C54 | 24.0(11) | 30.6(12) | 19.0(10) | 0.1(10)   | -6.1(9)   | 5.1(10)   |
| C55 | 27.9(12) | 41.9(15) | 15.3(10) | -4.0(11)  | -4.1(9)   | 10.4(12)  |
| C56 | 25.1(11) | 39.6(14) | 14.7(10) | -1.1(10)  | -1.2(8)   | 8.0(11)   |
| C57 | 18.6(10) | 22.2(10) | 15.4(9)  | -1.0(9)   | -3.2(8)   | 3.1(9)    |
| C58 | 19.4(10) | 20.2(10) | 16.2(9)  | -3.0(8)   | 0.7(8)    | 1.9(9)    |
| C59 | 15.2(9)  | 18.4(9)  | 17.6(9)  | -1.5(9)   | 0.3(8)    | 1.1(8)    |
| C60 | 20.3(10) | 20.0(10) | 19.6(10) | -1.3(9)   | 0.7(8)    | 1.5(9)    |
| C61 | 16.8(10) | 18.9(10) | 24.6(11) | -1.7(9)   | 2.3(8)    | 2.6(9)    |
| C62 | 15.7(9)  | 21.0(10) | 24.5(10) | -0.1(9)   | -2.8(8)   | -0.6(9)   |
| C63 | 17.6(9)  | 17.9(9)  | 20.8(10) | -1.8(9)   | -1.4(8)   | 0.9(8)    |
| C64 | 17.4(9)  | 16.1(9)  | 16.8(9)  | 2.0(8)    | -0.7(8)   | 2.0(8)    |
| C65 | 15.5(10) | 21.6(11) | 36.6(13) | -3.7(11)  | 4.0(9)    | 2.7(9)    |
| C66 | 24.3(13) | 71(2)    | 45.6(17) | -27.8(18) | 3.4(12)   | 12.3(15)  |
| C67 | 13.4(10) | 28.4(12) | 36.8(13) | 0.5(11)   | 2.9(9)    | 1.1(9)    |
| C68 | 29.0(14) | 21.7(12) | 88(3)    | 7.1(16)   | 12.2(16)  | 6.7(11)   |
| C69 | 24.8(11) | 26.3(12) | 22.3(10) | -8.1(10)  | -6.3(9)   | 5.8(10)   |
| C70 | 33.2(15) | 61(2)    | 53.0(19) | -35.7(18) | -19.1(14) | 13.0(15)  |
| C71 | 62(2)    | 79(3)    | 20.8(13) | 0.4(16)   | -6.7(14)  | -16(2)    |
| C72 | 55(2)    | 32.2(15) | 57(2)    | -24.2(16) | -27.5(17) | 14.5(15)  |
| N1  | 17.9(8)  | 15.3(8)  | 18.4(8)  | 0.8(7)    | 3.6(7)    | 2.3(7)    |
| N2  | 18.7(8)  | 13.6(8)  | 17.7(8)  | 2.8(7)    | 3.9(7)    | 2.4(7)    |
| N3  | 17.7(8)  | 19.6(8)  | 12.5(7)  | 1.0(7)    | -0.3(6)   | 3.9(7)    |
| N4  | 16.7(8)  | 20.1(8)  | 15.7(8)  | -1.0(7)   | -1.6(7)   | 1.6(7)    |
| O1  | 19.5(7)  | 19.1(7)  | 17.5(7)  | 3.0(6)    | 0.9(6)    | -2.8(6)   |
| O2  | 15.6(7)  | 20.6(7)  | 16.5(7)  | 4.1(6)    | 0.2(6)    | 1.4(6)    |
| O3  | 22.9(8)  | 18.6(7)  | 21.8(7)  | 0.6(7)    | -1.3(7)   | 5.3(7)    |
| O4  | 15.2(8)  | 18.2(7)  | 21.8(8)  | 2.3(6)    | 1.4(6)    | 2.9(6)    |
| O5  | 19.6(7)  | 22.4(8)  | 15.4(7)  | 3.3(7)    | -0.8(6)   | -1.0(7)   |
| O6  | 16.9(7)  | 21.2(7)  | 18.0(7)  | -2.5(7)   | 0.7(6)    | 4.3(6)    |
| O7  | 46(4)    | 52(4)    | 15(3)    | 17(3)     | -13(2)    | -44(3)    |



**Bond Lengths for 1.HCl.**

| <b>Atom</b> | <b>Atom</b> | <b>Length/Å</b> | <b>Atom</b> | <b>Atom</b> | <b>Length/Å</b> |
|-------------|-------------|-----------------|-------------|-------------|-----------------|
| Al1         | N1          | 1.996(2)        | C29         | C31         | 1.528(4)        |
| Al1         | N2          | 2.000(2)        | C29         | C32         | 1.532(4)        |
| Al1         | O1          | 1.8112(17)      | C33         | C34         | 1.541(3)        |
| Al1         | O2          | 1.8000(17)      | C33         | C35         | 1.549(4)        |
| Al1         | O3          | 2.0139(18)      | C33         | C36         | 1.538(3)        |
| Al1         | O4          | 1.9407(18)      | C37         | C38         | 1.428(3)        |
| Al2         | N3          | 1.992(2)        | C37         | C42         | 1.412(3)        |
| Al2         | N4          | 1.975(2)        | C37         | O5          | 1.327(3)        |
| Al2         | O4          | 1.8154(18)      | C38         | C39         | 1.382(4)        |
| Al2         | O5          | 1.7754(17)      | C38         | C44         | 1.532(3)        |
| Al2         | O6          | 1.7983(17)      | C39         | C40         | 1.408(4)        |
| C1          | C2          | 1.432(3)        | C40         | C41         | 1.378(4)        |
| C1          | C6          | 1.420(3)        | C40         | C48         | 1.528(4)        |
| C1          | O1          | 1.319(3)        | C41         | C42         | 1.405(3)        |
| C2          | C3          | 1.382(3)        | C42         | C43         | 1.444(3)        |
| C2          | C8          | 1.530(3)        | C43         | N3          | 1.280(3)        |
| C3          | C4          | 1.419(4)        | C44         | C45         | 1.535(4)        |
| C4          | C5          | 1.376(3)        | C44         | C46         | 1.533(4)        |
| C4          | C12         | 1.532(3)        | C44         | C47         | 1.533(4)        |
| C5          | C6          | 1.397(3)        | C48         | C49         | 1.509(5)        |
| C6          | C7          | 1.444(3)        | C48         | C50         | 1.553(4)        |
| C7          | N1          | 1.280(3)        | C48         | C51         | 1.534(4)        |
| C8          | C9          | 1.523(4)        | C52         | C53         | 1.529(3)        |
| C8          | C10         | 1.547(4)        | C52         | C57         | 1.529(3)        |
| C8          | C11         | 1.526(3)        | C52         | N3          | 1.475(3)        |
| C12         | C13         | 1.519(4)        | C53         | C54         | 1.531(3)        |
| C12         | C14         | 1.532(4)        | C54         | C55         | 1.530(3)        |
| C12         | C15         | 1.542(4)        | C55         | C56         | 1.529(3)        |
| C16         | C17         | 1.526(3)        | C56         | C57         | 1.523(3)        |
| C16         | C21         | 1.536(3)        | C57         | N4          | 1.486(3)        |
| C16         | N1          | 1.478(3)        | C58         | C59         | 1.427(3)        |
| C17         | C18         | 1.538(4)        | C58         | N4          | 1.305(3)        |
| C18         | C19         | 1.526(4)        | C59         | C60         | 1.408(3)        |
| C19         | C20         | 1.530(3)        | C59         | C64         | 1.416(3)        |
| C20         | C21         | 1.527(3)        | C60         | C61         | 1.378(3)        |
| C21         | N2          | 1.482(3)        | C61         | C62         | 1.413(3)        |
| C22         | C23         | 1.444(3)        | C61         | C65         | 1.533(3)        |
| C22         | N2          | 1.286(3)        | C62         | C63         | 1.392(3)        |
| C23         | C24         | 1.410(3)        | C63         | C64         | 1.431(3)        |
| C23         | C28         | 1.413(3)        | C63         | C69         | 1.527(3)        |
| C24         | C25         | 1.380(3)        | C64         | O6          | 1.320(3)        |
| C25         | C26         | 1.417(3)        | C65         | C66         | 1.528(4)        |
| C25         | C29         | 1.528(3)        | C65         | C67         | 1.533(3)        |
| C26         | C27         | 1.387(3)        | C65         | C68         | 1.552(4)        |

**Bond Lengths for 1.HCl.**

| <b>Atom</b> | <b>Atom</b> | <b>Length/Å</b> | <b>Atom</b> | <b>Atom</b> | <b>Length/Å</b> |
|-------------|-------------|-----------------|-------------|-------------|-----------------|
| C27         | C28         | 1.430(3)        | C69         | C70         | 1.526(4)        |
| C27         | C33         | 1.536(3)        | C69         | C71         | 1.529(4)        |
| C28         | O2          | 1.316(3)        | C69         | C72         | 1.540(4)        |
| C29         | C30         | 1.534(4)        |             |             |                 |

### Bond Angles for 1.HCl

| Atom | Atom | Atom | Angle/°   | Atom | Atom | Atom | Angle/°    |
|------|------|------|-----------|------|------|------|------------|
| N1   | Al1  | N2   | 80.88(8)  | C27  | C33  | C36  | 112.0(2)   |
| N1   | Al1  | O3   | 83.92(7)  | C34  | C33  | C35  | 106.9(2)   |
| N2   | Al1  | O3   | 88.12(8)  | C36  | C33  | C34  | 108.0(2)   |
| O1   | Al1  | N1   | 91.24(8)  | C36  | C33  | C35  | 109.2(2)   |
| O1   | Al1  | N2   | 172.07(9) | C42  | C37  | C38  | 118.7(2)   |
| O1   | Al1  | O3   | 91.94(8)  | O5   | C37  | C38  | 120.0(2)   |
| O1   | Al1  | O4   | 88.31(8)  | O5   | C37  | C42  | 121.33(19) |
| O2   | Al1  | N1   | 167.33(8) | C37  | C38  | C44  | 121.0(2)   |
| O2   | Al1  | N2   | 91.62(8)  | C39  | C38  | C37  | 117.5(2)   |
| O2   | Al1  | O1   | 96.30(8)  | C39  | C38  | C44  | 121.5(2)   |
| O2   | Al1  | O3   | 85.65(8)  | C38  | C39  | C40  | 125.1(2)   |
| O2   | Al1  | O4   | 95.40(8)  | C39  | C40  | C48  | 119.8(2)   |
| O4   | Al1  | N1   | 94.99(8)  | C41  | C40  | C39  | 116.2(2)   |
| O4   | Al1  | N2   | 91.48(8)  | C41  | C40  | C48  | 124.0(2)   |
| O4   | Al1  | O3   | 178.89(8) | C40  | C41  | C42  | 122.0(2)   |
| N4   | Al2  | N3   | 79.50(8)  | C37  | C42  | C43  | 121.7(2)   |
| O4   | Al2  | N3   | 95.67(8)  | C41  | C42  | C37  | 120.5(2)   |
| O4   | Al2  | N4   | 118.14(8) | C41  | C42  | C43  | 117.6(2)   |
| O5   | Al2  | N3   | 89.89(8)  | N3   | C43  | C42  | 124.3(2)   |
| O5   | Al2  | N4   | 130.62(9) | C38  | C44  | C45  | 109.3(2)   |
| O5   | Al2  | O4   | 110.80(8) | C38  | C44  | C46  | 110.2(2)   |
| O5   | Al2  | O6   | 94.08(8)  | C38  | C44  | C47  | 112.4(2)   |
| O6   | Al2  | N3   | 168.39(8) | C46  | C44  | C45  | 110.8(2)   |
| O6   | Al2  | N4   | 89.67(8)  | C47  | C44  | C45  | 107.2(2)   |
| O6   | Al2  | O4   | 93.12(8)  | C47  | C44  | C46  | 106.9(2)   |
| C6   | C1   | C2   | 118.2(2)  | C40  | C48  | C50  | 107.9(2)   |
| O1   | C1   | C2   | 120.1(2)  | C40  | C48  | C51  | 111.4(2)   |
| O1   | C1   | C6   | 121.7(2)  | C49  | C48  | C40  | 111.6(3)   |
| C1   | C2   | C8   | 120.3(2)  | C49  | C48  | C50  | 111.2(3)   |
| C3   | C2   | C1   | 117.3(2)  | C49  | C48  | C51  | 107.7(2)   |
| C3   | C2   | C8   | 122.3(2)  | C51  | C48  | C50  | 107.0(3)   |
| C2   | C3   | C4   | 125.5(2)  | C57  | C52  | C53  | 110.63(18) |
| C3   | C4   | C12  | 120.4(2)  | N3   | C52  | C53  | 118.12(19) |
| C5   | C4   | C3   | 115.7(2)  | N3   | C52  | C57  | 104.41(17) |
| C5   | C4   | C12  | 123.9(2)  | C52  | C53  | C54  | 108.50(19) |
| C4   | C5   | C6   | 122.2(2)  | C55  | C54  | C53  | 112.0(2)   |
| C1   | C6   | C7   | 122.0(2)  | C56  | C55  | C54  | 112.2(2)   |
| C5   | C6   | C1   | 121.1(2)  | C57  | C56  | C55  | 109.0(2)   |
| C5   | C6   | C7   | 116.9(2)  | C56  | C57  | C52  | 109.93(19) |
| N1   | C7   | C6   | 125.5(2)  | N4   | C57  | C52  | 106.09(17) |
| C2   | C8   | C10  | 108.9(2)  | N4   | C57  | C56  | 116.12(19) |
| C9   | C8   | C2   | 111.1(2)  | N4   | C58  | C59  | 126.0(2)   |
| C9   | C8   | C10  | 110.2(2)  | C60  | C59  | C58  | 116.96(19) |
| C9   | C8   | C11  | 108.0(2)  | C60  | C59  | C64  | 121.5(2)   |

**Bond Angles for 1.HCl**

| <b>Atom</b> | <b>Atom</b> | <b>Atom</b> | <b>Angle/°</b> | <b>Atom</b> | <b>Atom</b> | <b>Atom</b> | <b>Angle/°</b> |
|-------------|-------------|-------------|----------------|-------------|-------------|-------------|----------------|
| C11         | C8          | C2          | 111.4(2)       | C64         | C59         | C58         | 121.53(19)     |
| C11         | C8          | C10         | 107.2(2)       | C61         | C60         | C59         | 121.2(2)       |
| C4          | C12         | C15         | 110.8(2)       | C60         | C61         | C62         | 116.5(2)       |
| C13         | C12         | C4          | 110.1(2)       | C60         | C61         | C65         | 122.1(2)       |
| C13         | C12         | C14         | 109.9(2)       | C62         | C61         | C65         | 121.2(2)       |
| C13         | C12         | C15         | 107.9(3)       | C63         | C62         | C61         | 124.9(2)       |
| C14         | C12         | C4          | 109.5(2)       | C62         | C63         | C64         | 117.4(2)       |
| C14         | C12         | C15         | 108.6(3)       | C62         | C63         | C69         | 121.1(2)       |
| C17         | C16         | C21         | 110.58(19)     | C64         | C63         | C69         | 121.41(19)     |
| N1          | C16         | C17         | 116.35(19)     | C59         | C64         | C63         | 118.01(19)     |
| N1          | C16         | C21         | 105.63(17)     | O6          | C64         | C59         | 120.46(19)     |
| C16         | C17         | C18         | 110.5(2)       | O6          | C64         | C63         | 121.53(19)     |
| C19         | C18         | C17         | 111.3(2)       | C61         | C65         | C68         | 108.3(2)       |
| C18         | C19         | C20         | 112.0(2)       | C66         | C65         | C61         | 111.1(2)       |
| C21         | C20         | C19         | 109.4(2)       | C66         | C65         | C67         | 107.9(2)       |
| C20         | C21         | C16         | 111.65(18)     | C66         | C65         | C68         | 109.9(3)       |
| N2          | C21         | C16         | 105.09(18)     | C67         | C65         | C61         | 112.0(2)       |
| N2          | C21         | C20         | 116.89(19)     | C67         | C65         | C68         | 107.5(2)       |
| N2          | C22         | C23         | 125.4(2)       | C63         | C69         | C71         | 109.6(2)       |
| C24         | C23         | C22         | 116.4(2)       | C63         | C69         | C72         | 110.5(2)       |
| C24         | C23         | C28         | 121.1(2)       | C70         | C69         | C63         | 112.5(2)       |
| C28         | C23         | C22         | 122.5(2)       | C70         | C69         | C71         | 109.8(3)       |
| C25         | C24         | C23         | 121.6(2)       | C70         | C69         | C72         | 105.6(3)       |
| C24         | C25         | C26         | 116.2(2)       | C71         | C69         | C72         | 108.8(3)       |
| C24         | C25         | C29         | 123.8(2)       | C7          | N1          | Al1         | 125.14(16)     |
| C26         | C25         | C29         | 120.1(2)       | C7          | N1          | C16         | 120.52(19)     |
| C27         | C26         | C25         | 125.0(2)       | C16         | N1          | Al1         | 114.03(14)     |
| C26         | C27         | C28         | 117.5(2)       | C21         | N2          | Al1         | 113.70(14)     |
| C26         | C27         | C33         | 121.9(2)       | C22         | N2          | Al1         | 124.12(15)     |
| C28         | C27         | C33         | 120.5(2)       | C22         | N2          | C21         | 121.73(19)     |
| C23         | C28         | C27         | 118.4(2)       | C43         | N3          | Al2         | 126.87(15)     |
| O2          | C28         | C23         | 121.7(2)       | C43         | N3          | C52         | 121.78(19)     |
| O2          | C28         | C27         | 119.9(2)       | C52         | N3          | Al2         | 110.78(14)     |
| C25         | C29         | C30         | 111.9(2)       | C57         | N4          | Al2         | 116.79(14)     |
| C25         | C29         | C31         | 108.6(2)       | C58         | N4          | Al2         | 125.41(15)     |
| C25         | C29         | C32         | 110.6(2)       | C58         | N4          | C57         | 117.04(18)     |
| C31         | C29         | C30         | 109.1(2)       | C1          | O1          | Al1         | 131.93(15)     |
| C31         | C29         | C32         | 109.0(2)       | C28         | O2          | Al1         | 131.02(14)     |
| C32         | C29         | C30         | 107.6(2)       | Al2         | O4          | Al1         | 153.17(11)     |
| C27         | C33         | C34         | 111.7(2)       | C37         | O5          | Al2         | 134.59(14)     |
| C27         | C33         | C35         | 108.97(19)     | C64         | O6          | Al2         | 135.41(14)     |

### Torsion Angles for 1.HCl.

| A   | B   | C   | D   | Angle/°     | A   | B   | C   | D   | Angle/°     |
|-----|-----|-----|-----|-------------|-----|-----|-----|-----|-------------|
| C1  | C2  | C3  | C4  | 0.3(4)      | C41 | C40 | C48 | C50 | -104.5(3)   |
| C1  | C2  | C8  | C9  | 60.2(3)     | C41 | C40 | C48 | C51 | 12.6(4)     |
| C1  | C2  | C8  | C10 | -61.3(3)    | C41 | C42 | C43 | N3  | 178.8(2)    |
| C1  | C2  | C8  | C11 | -179.3(2)   | C42 | C37 | C38 | C39 | 1.0(3)      |
| C1  | C6  | C7  | N1  | 9.2(4)      | C42 | C37 | C38 | C44 | -178.8(2)   |
| C2  | C1  | C6  | C5  | 0.5(4)      | C42 | C37 | O5  | Al2 | 9.5(3)      |
| C2  | C1  | C6  | C7  | -178.0(2)   | C42 | C43 | N3  | Al2 | 0.2(3)      |
| C2  | C1  | O1  | Al1 | 161.63(16)  | C42 | C43 | N3  | C52 | 170.7(2)    |
| C2  | C3  | C4  | C5  | -0.3(4)     | C44 | C38 | C39 | C40 | -179.8(2)   |
| C2  | C3  | C4  | C12 | 177.1(2)    | C48 | C40 | C41 | C42 | 178.4(2)    |
| C3  | C2  | C8  | C9  | -124.1(2)   | C52 | C53 | C54 | C55 | 55.1(3)     |
| C3  | C2  | C8  | C10 | 114.4(3)    | C52 | C57 | N4  | Al2 | 19.8(2)     |
| C3  | C2  | C8  | C11 | -3.5(3)     | C52 | C57 | N4  | C58 | -169.6(2)   |
| C3  | C4  | C5  | C6  | 0.3(4)      | C53 | C52 | C57 | C56 | 62.3(3)     |
| C3  | C4  | C12 | C13 | -55.4(3)    | C53 | C52 | C57 | N4  | -171.38(18) |
| C3  | C4  | C12 | C14 | 65.6(3)     | C53 | C52 | N3  | Al2 | 174.32(16)  |
| C3  | C4  | C12 | C15 | -174.7(3)   | C53 | C52 | N3  | C43 | 2.4(3)      |
| C4  | C5  | C6  | C1  | -0.5(4)     | C53 | C54 | C55 | C56 | -54.7(3)    |
| C4  | C5  | C6  | C7  | 178.1(2)    | C54 | C55 | C56 | C57 | 55.4(3)     |
| C5  | C4  | C12 | C13 | 121.8(3)    | C55 | C56 | C57 | C52 | -58.8(3)    |
| C5  | C4  | C12 | C14 | -117.3(3)   | C55 | C56 | C57 | N4  | -179.2(2)   |
| C5  | C4  | C12 | C15 | 2.5(4)      | C56 | C57 | N4  | Al2 | 142.23(18)  |
| C5  | C6  | C7  | N1  | -169.3(2)   | C56 | C57 | N4  | C58 | -47.2(3)    |
| C6  | C1  | C2  | C3  | -0.4(3)     | C57 | C52 | C53 | C54 | -59.1(3)    |
| C6  | C1  | C2  | C8  | 175.6(2)    | C57 | C52 | N3  | Al2 | 50.97(19)   |
| C6  | C1  | O1  | Al1 | -17.5(3)    | C57 | C52 | N3  | C43 | -120.9(2)   |
| C6  | C7  | N1  | Al1 | -4.3(3)     | C58 | C59 | C60 | C61 | -178.1(2)   |
| C6  | C7  | N1  | C16 | -177.6(2)   | C58 | C59 | C64 | C63 | -175.8(2)   |
| C8  | C2  | C3  | C4  | -175.6(2)   | C58 | C59 | C64 | O6  | 3.2(3)      |
| C12 | C4  | C5  | C6  | -176.9(2)   | C59 | C58 | N4  | Al2 | -7.5(3)     |
| C16 | C17 | C18 | C19 | 55.2(3)     | C59 | C58 | N4  | C57 | -177.2(2)   |
| C16 | C21 | N2  | Al1 | 39.4(2)     | C59 | C60 | C61 | C62 | -4.4(3)     |
| C16 | C21 | N2  | C22 | -133.2(2)   | C59 | C60 | C61 | C65 | 172.3(2)    |
| C17 | C16 | C21 | C20 | 57.9(3)     | C59 | C64 | O6  | Al2 | 7.7(3)      |
| C17 | C16 | C21 | N2  | -174.40(18) | C60 | C59 | C64 | C63 | 4.6(3)      |
| C17 | C16 | N1  | Al1 | 161.12(17)  | C60 | C59 | C64 | O6  | -176.4(2)   |
| C17 | C16 | N1  | C7  | -24.9(3)    | C60 | C61 | C62 | C63 | 1.3(4)      |
| C17 | C18 | C19 | C20 | -55.8(3)    | C60 | C61 | C65 | C66 | 24.1(4)     |
| C18 | C19 | C20 | C21 | 56.0(3)     | C60 | C61 | C65 | C67 | 144.8(2)    |
| C19 | C20 | C21 | C16 | -57.0(3)    | C60 | C61 | C65 | C68 | -96.8(3)    |
| C19 | C20 | C21 | N2  | -178.0(2)   | C61 | C62 | C63 | C64 | 4.7(4)      |
| C20 | C21 | N2  | Al1 | 163.83(16)  | C61 | C62 | C63 | C69 | -177.9(2)   |
| C20 | C21 | N2  | C22 | -8.8(3)     | C62 | C61 | C65 | C66 | -159.4(3)   |
| C21 | C16 | C17 | C18 | -55.9(3)    | C62 | C61 | C65 | C67 | -38.6(3)    |

### Torsion Angles for 1.HCl.

| A   | B   | C   | D   | Angle/°     | A   | B   | C   | D   | Angle/°     |
|-----|-----|-----|-----|-------------|-----|-----|-----|-----|-------------|
| C21 | C16 | N1  | AI1 | 38.0(2)     | C62 | C61 | C65 | C68 | 79.8(3)     |
| C21 | C16 | N1  | C7  | -148.0(2)   | C62 | C63 | C64 | C59 | -7.4(3)     |
| C22 | C23 | C24 | C25 | 179.4(2)    | C62 | C63 | C64 | O6  | 173.6(2)    |
| C22 | C23 | C28 | C27 | -174.6(2)   | C62 | C63 | C69 | C70 | 11.7(4)     |
| C22 | C23 | C28 | O2  | 6.2(3)      | C62 | C63 | C69 | C71 | -110.7(3)   |
| C23 | C22 | N2  | AI1 | 4.8(3)      | C62 | C63 | C69 | C72 | 129.4(3)    |
| C23 | C22 | N2  | C21 | 176.6(2)    | C63 | C64 | O6  | AI2 | -173.29(17) |
| C23 | C24 | C25 | C26 | -3.5(3)     | C64 | C59 | C60 | C61 | 1.6(4)      |
| C23 | C24 | C25 | C29 | 177.0(2)    | C64 | C63 | C69 | C70 | -171.1(3)   |
| C23 | C28 | O2  | AI1 | -22.1(3)    | C64 | C63 | C69 | C71 | 66.6(3)     |
| C24 | C23 | C28 | C27 | 4.2(3)      | C64 | C63 | C69 | C72 | -53.4(3)    |
| C24 | C23 | C28 | O2  | -175.1(2)   | C65 | C61 | C62 | C63 | -175.4(2)   |
| C24 | C25 | C26 | C27 | 1.7(3)      | C69 | C63 | C64 | C59 | 175.2(2)    |
| C24 | C25 | C29 | C30 | 11.2(3)     | C69 | C63 | C64 | O6  | -3.8(3)     |
| C24 | C25 | C29 | C31 | -109.3(3)   | N1  | AI1 | O1  | C1  | 17.8(2)     |
| C24 | C25 | C29 | C32 | 131.1(3)    | N1  | AI1 | O2  | C28 | -31.1(5)    |
| C25 | C26 | C27 | C28 | 3.0(3)      | N1  | C16 | C17 | C18 | -176.4(2)   |
| C25 | C26 | C27 | C33 | -172.9(2)   | N1  | C16 | C21 | C20 | -175.38(18) |
| C26 | C25 | C29 | C30 | -168.3(2)   | N1  | C16 | C21 | N2  | -47.7(2)    |
| C26 | C25 | C29 | C31 | 71.2(3)     | N2  | AI1 | O2  | C28 | 22.2(2)     |
| C26 | C25 | C29 | C32 | -48.4(3)    | N2  | C22 | C23 | C24 | -177.4(2)   |
| C26 | C27 | C28 | C23 | -5.8(3)     | N2  | C22 | C23 | C28 | 1.4(4)      |
| C26 | C27 | C28 | O2  | 173.5(2)    | N3  | AI2 | O4  | AI1 | 14.3(2)     |
| C26 | C27 | C33 | C34 | 1.1(3)      | N3  | AI2 | O5  | C37 | -12.7(2)    |
| C26 | C27 | C33 | C35 | 118.9(2)    | N3  | AI2 | O6  | C64 | 7.9(6)      |
| C26 | C27 | C33 | C36 | -120.1(2)   | N3  | C52 | C53 | C54 | -179.2(2)   |
| C27 | C28 | O2  | AI1 | 158.64(17)  | N3  | C52 | C57 | C56 | -169.61(19) |
| C28 | C23 | C24 | C25 | 0.7(3)      | N3  | C52 | C57 | N4  | -43.3(2)    |
| C28 | C27 | C33 | C34 | -174.7(2)   | N4  | AI2 | O4  | AI1 | 95.4(2)     |
| C28 | C27 | C33 | C35 | -56.9(3)    | N4  | AI2 | O5  | C37 | -88.7(2)    |
| C28 | C27 | C33 | C36 | 64.1(3)     | N4  | AI2 | O6  | C64 | -13.1(2)    |
| C29 | C25 | C26 | C27 | -178.8(2)   | N4  | C58 | C59 | C60 | 177.3(2)    |
| C33 | C27 | C28 | C23 | 170.2(2)    | N4  | C58 | C59 | C64 | -2.3(4)     |
| C33 | C27 | C28 | O2  | -10.6(3)    | O1  | AI1 | O2  | C28 | -157.3(2)   |
| C37 | C38 | C39 | C40 | 0.3(4)      | O1  | C1  | C2  | C3  | -179.6(2)   |
| C37 | C38 | C44 | C45 | 61.4(3)     | O1  | C1  | C2  | C8  | -3.6(3)     |
| C37 | C38 | C44 | C46 | -60.6(3)    | O1  | C1  | C6  | C5  | 179.7(2)    |
| C37 | C38 | C44 | C47 | -179.7(2)   | O1  | C1  | C6  | C7  | 1.2(4)      |
| C37 | C42 | C43 | N3  | -7.2(4)     | O2  | AI1 | O1  | C1  | -172.42(19) |
| C38 | C37 | C42 | C41 | -2.5(3)     | O3  | AI1 | O1  | C1  | 101.7(2)    |
| C38 | C37 | C42 | C43 | -176.3(2)   | O3  | AI1 | O2  | C28 | -65.8(2)    |
| C38 | C37 | O5  | AI2 | -171.08(17) | O4  | AI1 | O1  | C1  | -77.2(2)    |
| C38 | C39 | C40 | C41 | -0.2(4)     | O4  | AI1 | O2  | C28 | 113.8(2)    |
| C38 | C39 | C40 | C48 | -179.8(2)   | O4  | AI2 | O5  | C37 | 83.3(2)     |

**Torsion Angles for 1.HCl.**

| <b>A</b> | <b>B</b> | <b>C</b> | <b>D</b> | <b>Angle/°</b> | <b>A</b> | <b>B</b> | <b>C</b> | <b>D</b> | <b>Angle/°</b> |
|----------|----------|----------|----------|----------------|----------|----------|----------|----------|----------------|
| C39      | C38      | C44      | C45      | -118.4(3)      | O4       | Al2      | O6       | C64      | -131.3(2)      |
| C39      | C38      | C44      | C46      | 119.6(3)       | O5       | Al2      | O4       | Al1      | -77.7(2)       |
| C39      | C38      | C44      | C47      | 0.5(3)         | O5       | Al2      | O6       | C64      | 117.6(2)       |
| C39      | C40      | C41      | C42      | -1.2(3)        | O5       | C37      | C38      | C39      | -178.4(2)      |
| C39      | C40      | C48      | C49      | -47.4(3)       | O5       | C37      | C38      | C44      | 1.8(3)         |
| C39      | C40      | C48      | C50      | 75.1(3)        | O5       | C37      | C42      | C41      | 176.9(2)       |
| C39      | C40      | C48      | C51      | -167.8(2)      | O5       | C37      | C42      | C43      | 3.1(3)         |
| C40      | C41      | C42      | C37      | 2.6(4)         | O6       | Al2      | O4       | Al1      | -173.3(2)      |
| C40      | C41      | C42      | C43      | 176.7(2)       | O6       | Al2      | O5       | C37      | 178.2(2)       |
| C41      | C40      | C48      | C49      | 133.1(3)       |          |          |          |          |                |

**Hydrogen Atom Coordinates ( $\text{\AA}\times 10^4$ ) and Isotropic Displacement Parameters ( $\text{\AA}^2\times 10^3$ ) for 1.HCl.**

| Atom | x        | y       | z       | U(eq) |
|------|----------|---------|---------|-------|
| H3   | 7900.1   | 5369.85 | 3071.52 | 30    |
| H5   | 6537.3   | 5033    | 4285.88 | 30    |
| H7   | 4988.22  | 4736.06 | 4297.27 | 26    |
| H9A  | 5307.07  | 5395.97 | 2304.34 | 38    |
| H9B  | 5947.21  | 5476.35 | 1846.06 | 38    |
| H9C  | 6056.44  | 5984.62 | 2279.92 | 38    |
| H10A | 6970.27  | 4042.29 | 2380.98 | 50    |
| H10B | 6513.98  | 4311.22 | 1901.58 | 50    |
| H10C | 5879.7   | 4175.8  | 2355.51 | 50    |
| H11A | 8069.27  | 4980.45 | 2370.26 | 47    |
| H11B | 7715.16  | 5737.28 | 2330.37 | 47    |
| H11C | 7611.74  | 5241.48 | 1888.99 | 47    |
| H13A | 8882.4   | 4463.02 | 3909.29 | 67    |
| H13B | 9618.71  | 5051.67 | 3984.54 | 67    |
| H13C | 9107.12  | 4969.26 | 3486    | 67    |
| H14A | 8582.06  | 6201.67 | 3571.15 | 58    |
| H14B | 9140.91  | 6207.61 | 4059.72 | 58    |
| H14C | 8071.01  | 6413.36 | 4050.43 | 58    |
| H15A | 7713     | 5612.56 | 4658.87 | 71    |
| H15B | 8745.05  | 5326.28 | 4691.96 | 71    |
| H15C | 7899.91  | 4828.91 | 4591.03 | 71    |
| H16  | 2988.66  | 4619.56 | 4087.59 | 22    |
| H17A | 3926.7   | 4529.31 | 4765.61 | 31    |
| H17B | 4140.32  | 3759.64 | 4648.61 | 31    |
| H18A | 2959.96  | 3797.96 | 5225.98 | 38    |
| H18B | 2350.89  | 4285.26 | 4901.3  | 38    |
| H19A | 1755.13  | 3194.31 | 4839.36 | 33    |
| H19B | 2749.9   | 2909.42 | 4692.9  | 33    |
| H20A | 1843.64  | 3011.27 | 4003.79 | 27    |
| H20B | 1640.03  | 3784.11 | 4117.5  | 27    |
| H21  | 3434.41  | 3242.11 | 3911.33 | 22    |
| H22  | 1644.42  | 3468.37 | 3315.38 | 23    |
| H24  | 626.63   | 3519.17 | 2687.22 | 24    |
| H26  | 1353.61  | 4312.13 | 1433.15 | 25    |
| H30A | -613.01  | 3057.22 | 2324.75 | 46    |
| H30B | -1422.33 | 3424.76 | 2038.86 | 46    |
| H30C | -850.64  | 3824.47 | 2432.77 | 46    |
| H31A | 447.35   | 3278.96 | 1203.39 | 54    |
| H31B | -588.62  | 3034.1  | 1303.18 | 54    |
| H31C | 249.06   | 2738.9  | 1608.9  | 54    |
| H32A | -607.36  | 4677.05 | 1786.11 | 48    |
| H32B | -1107.34 | 4198.16 | 1411.27 | 48    |
| H32C | -82.54   | 4465.85 | 1310.62 | 48    |
| H34A | 2467.46  | 4606.15 | 944.08  | 50    |



**Hydrogen Atom Coordinates ( $\text{\AA}\times 10^4$ ) and Isotropic Displacement Parameters ( $\text{\AA}^2\times 10^3$ ) for 1.HCl.**

| Atom | x       | y       | z       | U(eq) |
|------|---------|---------|---------|-------|
| H34B | 3036.39 | 5292.83 | 962.37  | 50    |
| H34C | 2035.3  | 5246.96 | 1201.97 | 50    |
| H35A | 2724.72 | 5667.19 | 1961.5  | 39    |
| H35B | 3687.21 | 5717.96 | 1684.05 | 39    |
| H35C | 3628.85 | 5312.94 | 2171.43 | 39    |
| H36A | 4248.82 | 4252.72 | 1780.24 | 40    |
| H36B | 4378.84 | 4704.62 | 1317.68 | 40    |
| H36C | 3812.58 | 4017.65 | 1287.28 | 40    |
| H39  | 2758.42 | 1216.41 | 4587.2  | 30    |
| H41  | 1467.26 | 1705.12 | 3379.43 | 26    |
| H43  | 2275.7  | 2145.88 | 2730.71 | 22    |
| H45A | 4977.34 | 2512.09 | 4210.75 | 45    |
| H45B | 5462.15 | 2256.64 | 4686.5  | 45    |
| H45C | 4426.67 | 2539.46 | 4701.39 | 45    |
| H46A | 4976.32 | 695.39  | 4121.02 | 43    |
| H46B | 5776.71 | 1101.78 | 4386.5  | 43    |
| H46C | 5414.84 | 1347.42 | 3880.55 | 43    |
| H47A | 3846.6  | 1529.64 | 5076.45 | 65    |
| H47B | 4882.48 | 1247.7  | 5092.26 | 65    |
| H47C | 4074.27 | 805.73  | 4863.97 | 65    |
| H49A | 1475.92 | 173.24  | 4234.5  | 77    |
| H49B | 602.11  | 303.37  | 4569.71 | 77    |
| H49C | 1613.54 | 526.39  | 4737.61 | 77    |
| H50A | 1195.48 | 1740.92 | 4848.9  | 86    |
| H50B | 146.96  | 1523.64 | 4751.5  | 86    |
| H50C | 608.73  | 2108.67 | 4445.35 | 86    |
| H51A | 180.94  | 1519.14 | 3715.74 | 54    |
| H51B | -278.03 | 931.65  | 4020.65 | 54    |
| H51C | 480.74  | 758.34  | 3627.09 | 54    |
| H52  | 3696.35 | 3053.99 | 2137.13 | 21    |
| H53A | 2133.73 | 2710.86 | 2033.21 | 25    |
| H53B | 2470.21 | 1957.7  | 1935.12 | 25    |
| H54A | 2252.58 | 2495    | 1198.88 | 29    |
| H54B | 2915.14 | 3097.71 | 1355.29 | 29    |
| H55A | 3505.24 | 1751.45 | 1170.39 | 34    |
| H55B | 3753.04 | 2389.38 | 852.2   | 34    |
| H56A | 5033.31 | 2074.92 | 1343.65 | 32    |
| H56B | 4706.16 | 2826    | 1455.54 | 32    |
| H57  | 4143.67 | 1672.55 | 1989.87 | 22    |
| H58  | 5960.72 | 1827.24 | 1878.77 | 22    |
| H60  | 7502.66 | 1545.05 | 1950.11 | 24    |
| H62  | 8953.35 | 2001.22 | 3120.1  | 25    |
| H66A | 8628.76 | 927.09  | 1698.41 | 70    |
| H66B | 9727.65 | 1015.49 | 1668.56 | 70    |

**Hydrogen Atom Coordinates ( $\text{\AA}\times 10^4$ ) and Isotropic Displacement Parameters ( $\text{\AA}^2\times 10^3$ ) for 1.HCl.**

| Atom | x        | y        | z        | U(eq)  |
|------|----------|----------|----------|--------|
| H66C | 9067.84  | 1657.03  | 1635.62  | 70     |
| H67A | 10143    | 2074.93  | 2289.88  | 39     |
| H67B | 10628.42 | 1357.19  | 2329.37  | 39     |
| H67C | 10161.45 | 1689.15  | 2785.8   | 39     |
| H68A | 9177.59  | 651.1    | 2903     | 69     |
| H68B | 9754.09  | 352.43   | 2468.31  | 69     |
| H68C | 8647.21  | 344.87   | 2455.78  | 69     |
| H70A | 9011.2   | 2313.02  | 3846.52  | 73     |
| H70B | 8789.16  | 3025.69  | 4078.62  | 73     |
| H70C | 9109.44  | 2980.57  | 3537.78  | 73     |
| H71A | 6545.46  | 2294.38  | 3919.18  | 81     |
| H71B | 7255.49  | 2545.57  | 4315.53  | 81     |
| H71C | 7443.92  | 1858.9   | 4040.5   | 81     |
| H72A | 7680.93  | 3652.4   | 3345.19  | 72     |
| H72B | 7501.85  | 3649.35  | 3903.71  | 72     |
| H72C | 6705.91  | 3406.72  | 3549.6   | 72     |
| H3A  | 3229.37  | 5385.26  | 3426.3   | 32     |
| H3B  | 2881.37  | 5302.86  | 2951.6   | 32     |
| H7A  | 6692.96  | 4845.79  | 627.19   | 57     |
| H7B  | 6507.39  | 4244.49  | 877.57   | 57     |
| H4   | 5160(30) | 3480(20) | 3082(15) | 48(12) |

**Atomic Occupancy for 1.HCl.**

| Atom | Occupancy | Atom | Occupancy | Atom | Occupancy |
|------|-----------|------|-----------|------|-----------|
| O7   | 0.313(8)  | H7A  | 0.313(8)  | H7B  | 0.313(8)  |

**Solvent masks information for 1.HCl.**

| Number | X      | Y      | Z     | Volume | Electron count | Content                         |
|--------|--------|--------|-------|--------|----------------|---------------------------------|
| 1      | -0.258 | 0.250  | 0.000 | 841.6  | 142.43         | CH <sub>2</sub> Cl <sub>2</sub> |
| 2      | -0.812 | -0.250 | 0.500 | 841.6  | 142.63         | CH <sub>2</sub> Cl <sub>2</sub> |

Compound 1 <sup>1</sup>H NMR spectrum

NMR spectra

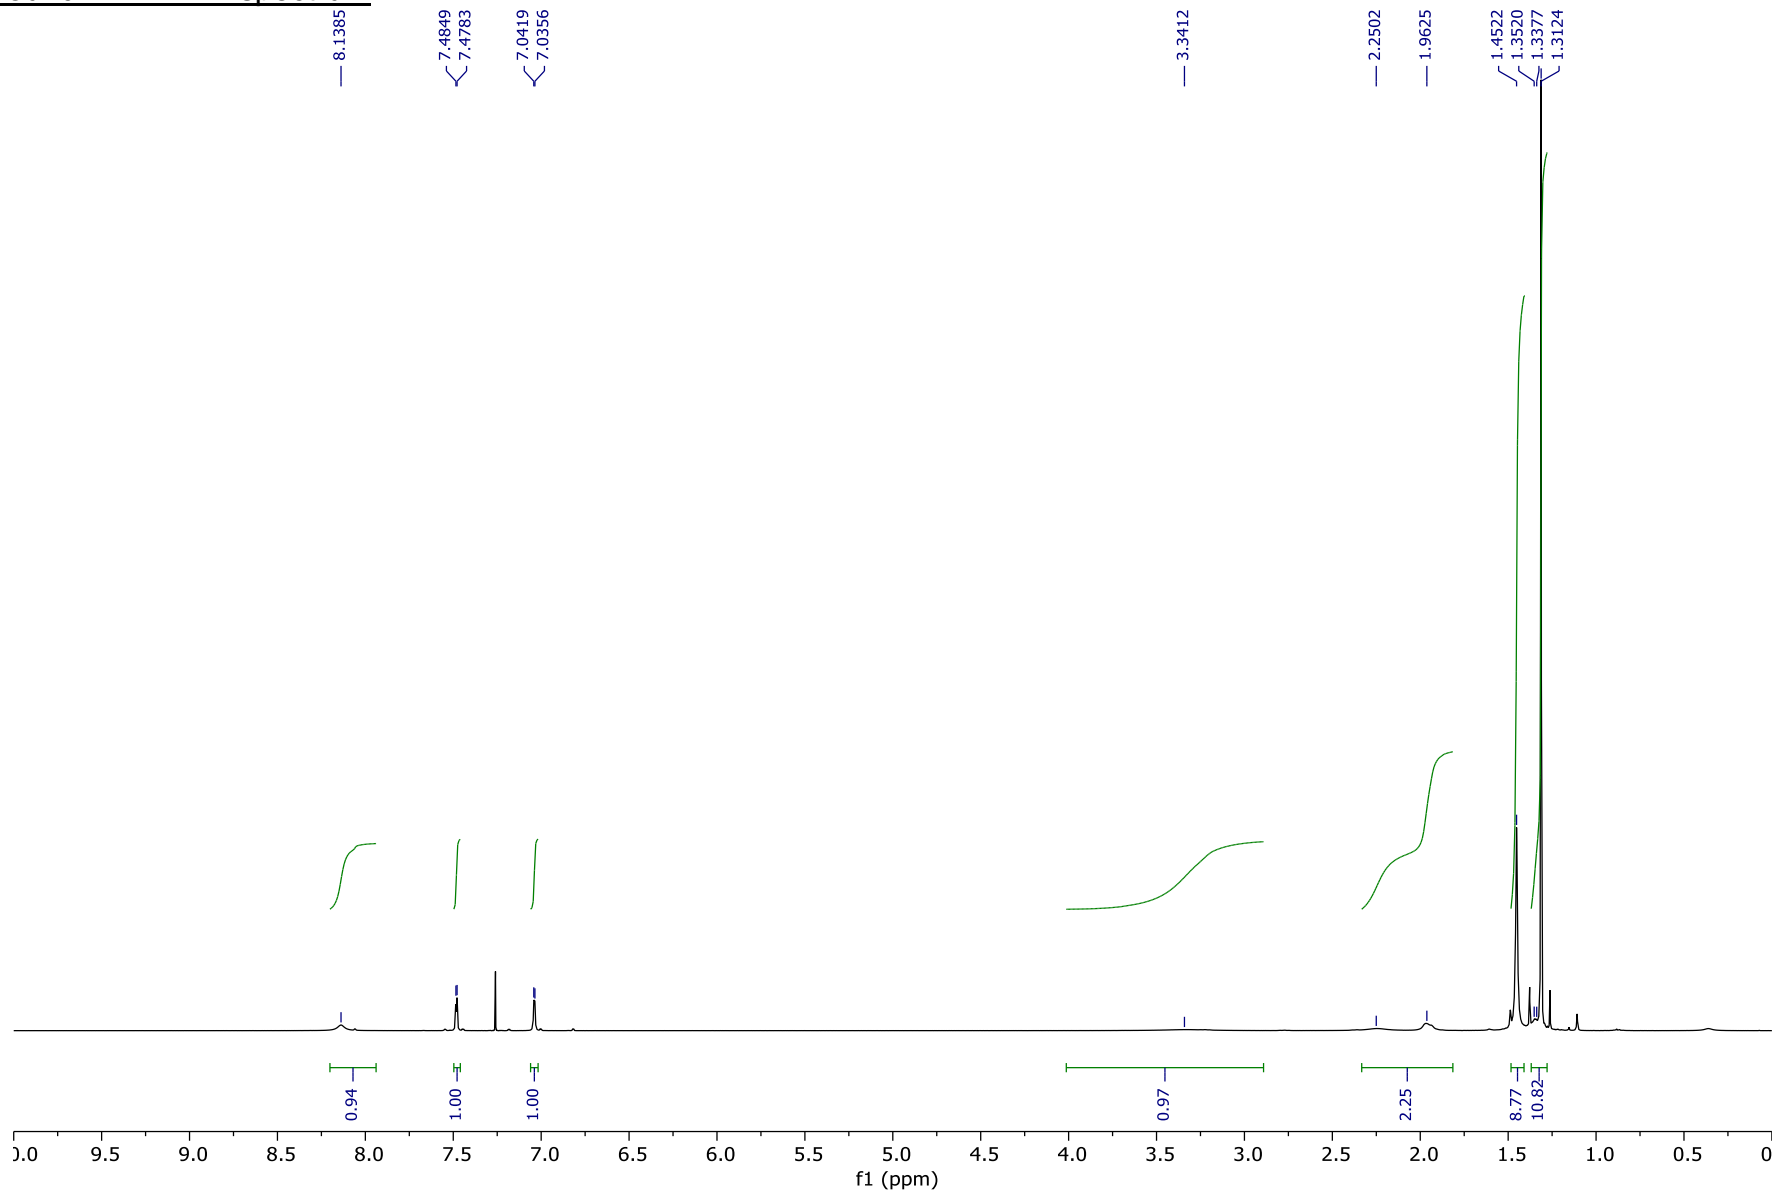

S19

VT NMR spectra (298-328 K) of 1 (7.6–7.4 ppm region)

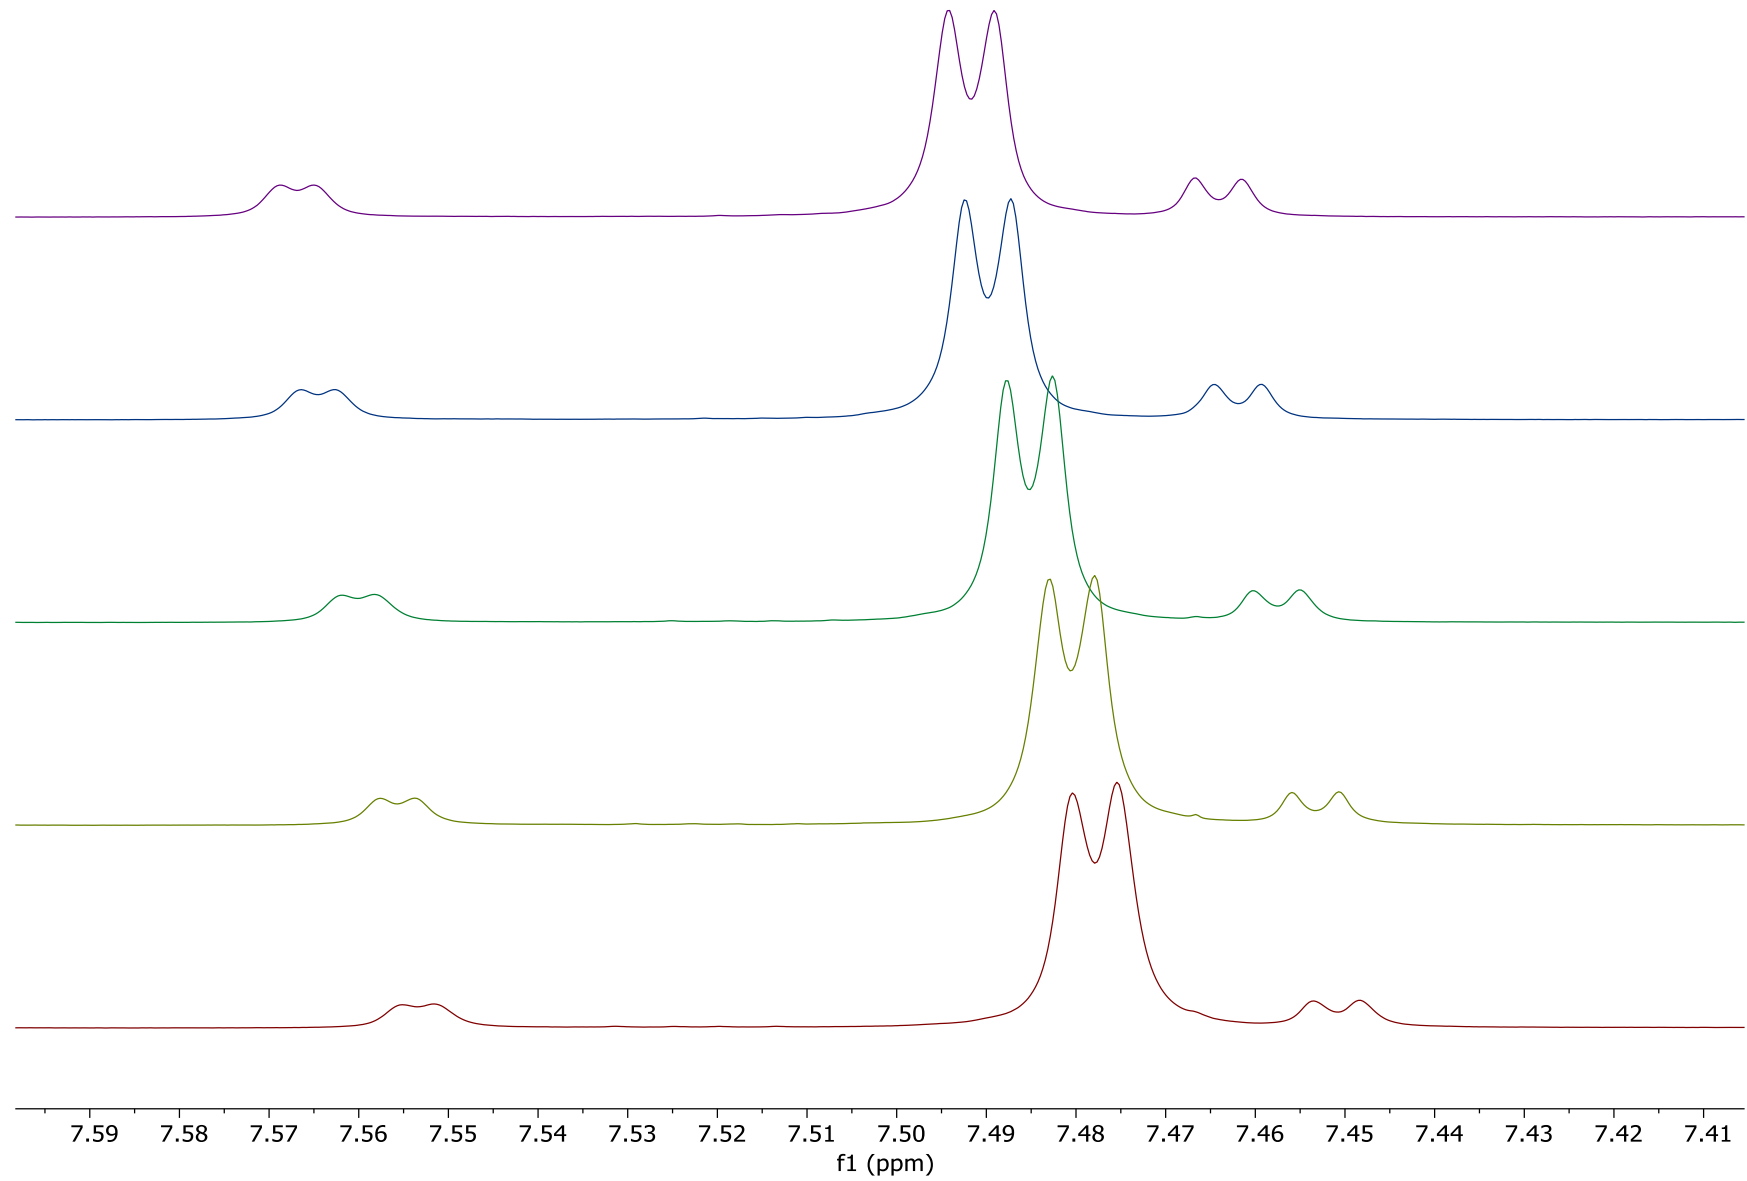

S20

VT NMR spectra (298-328 K) of 1 (7.25–6.81 ppm region)

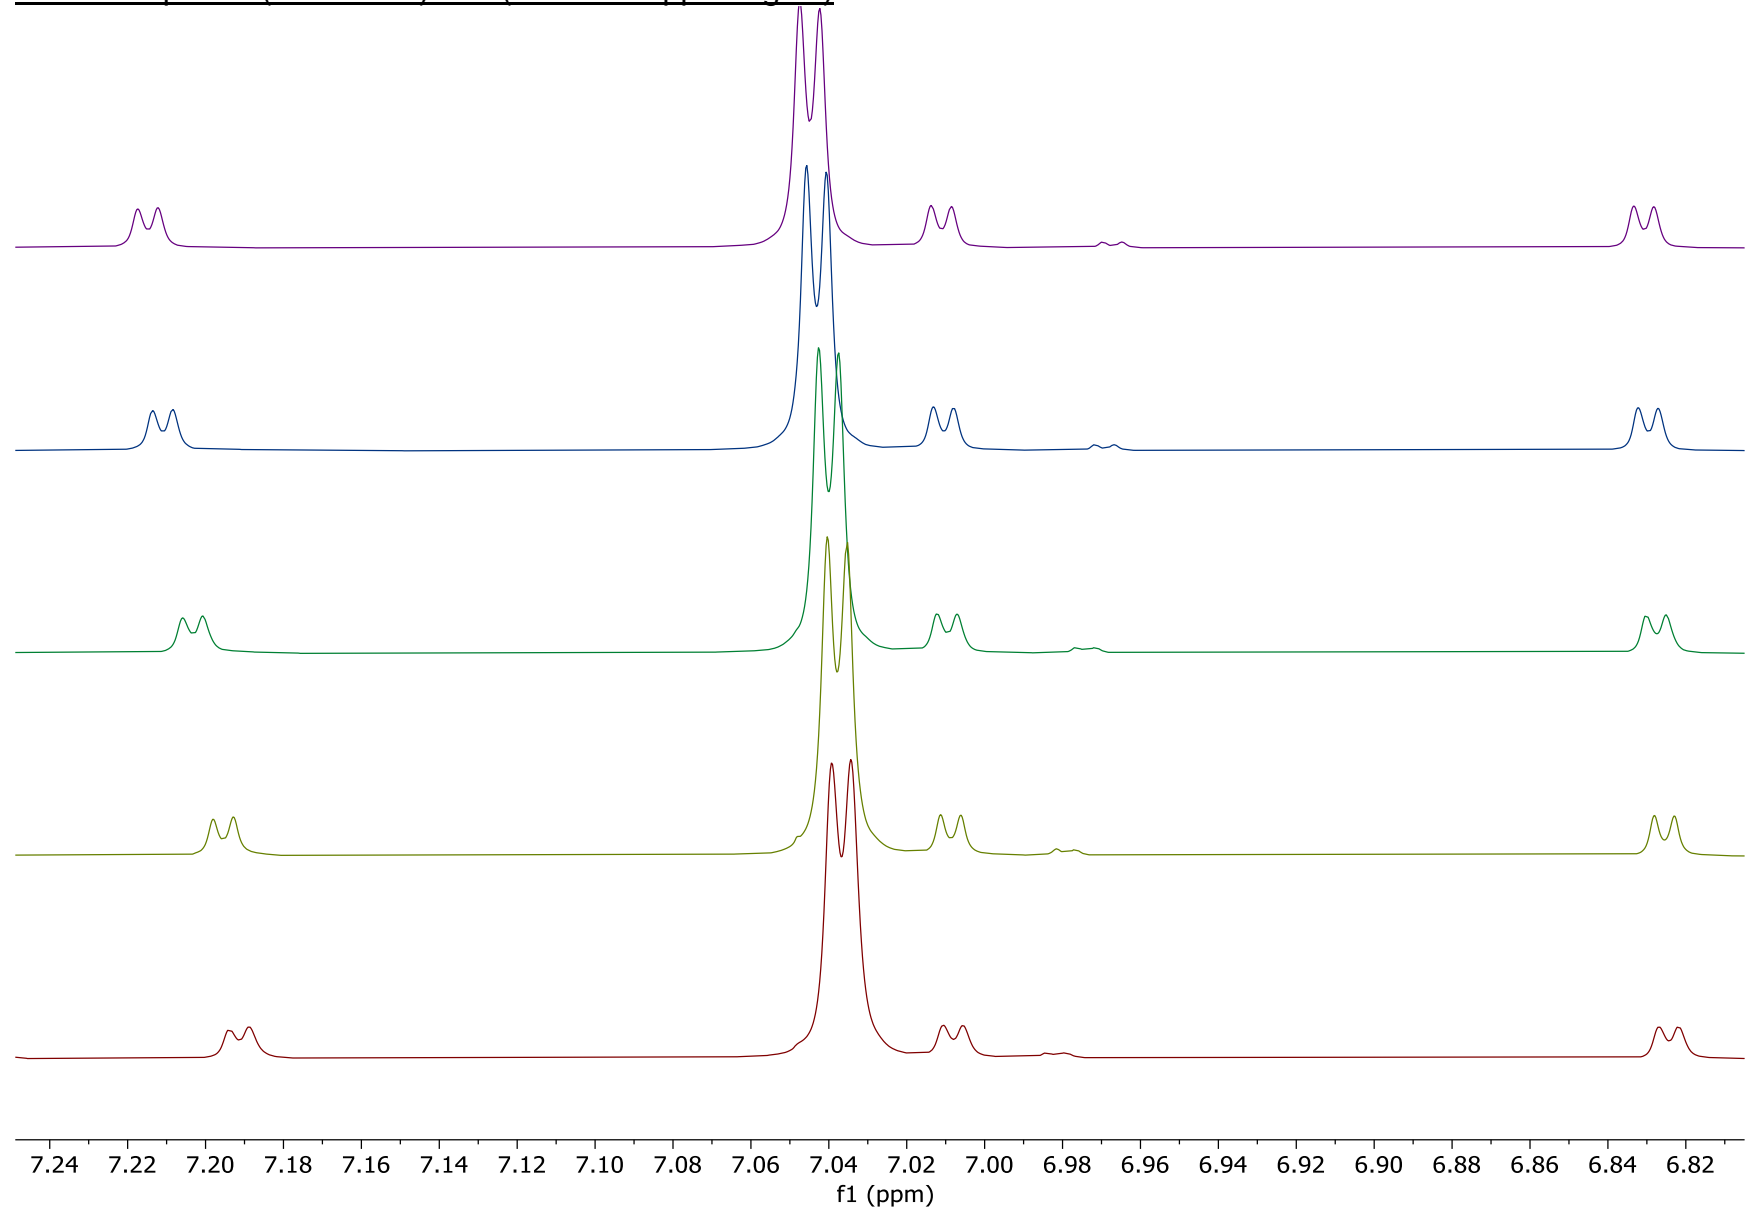

VT NMR spectra (298-328 K) of 1 (1.55–1.05 ppm region)

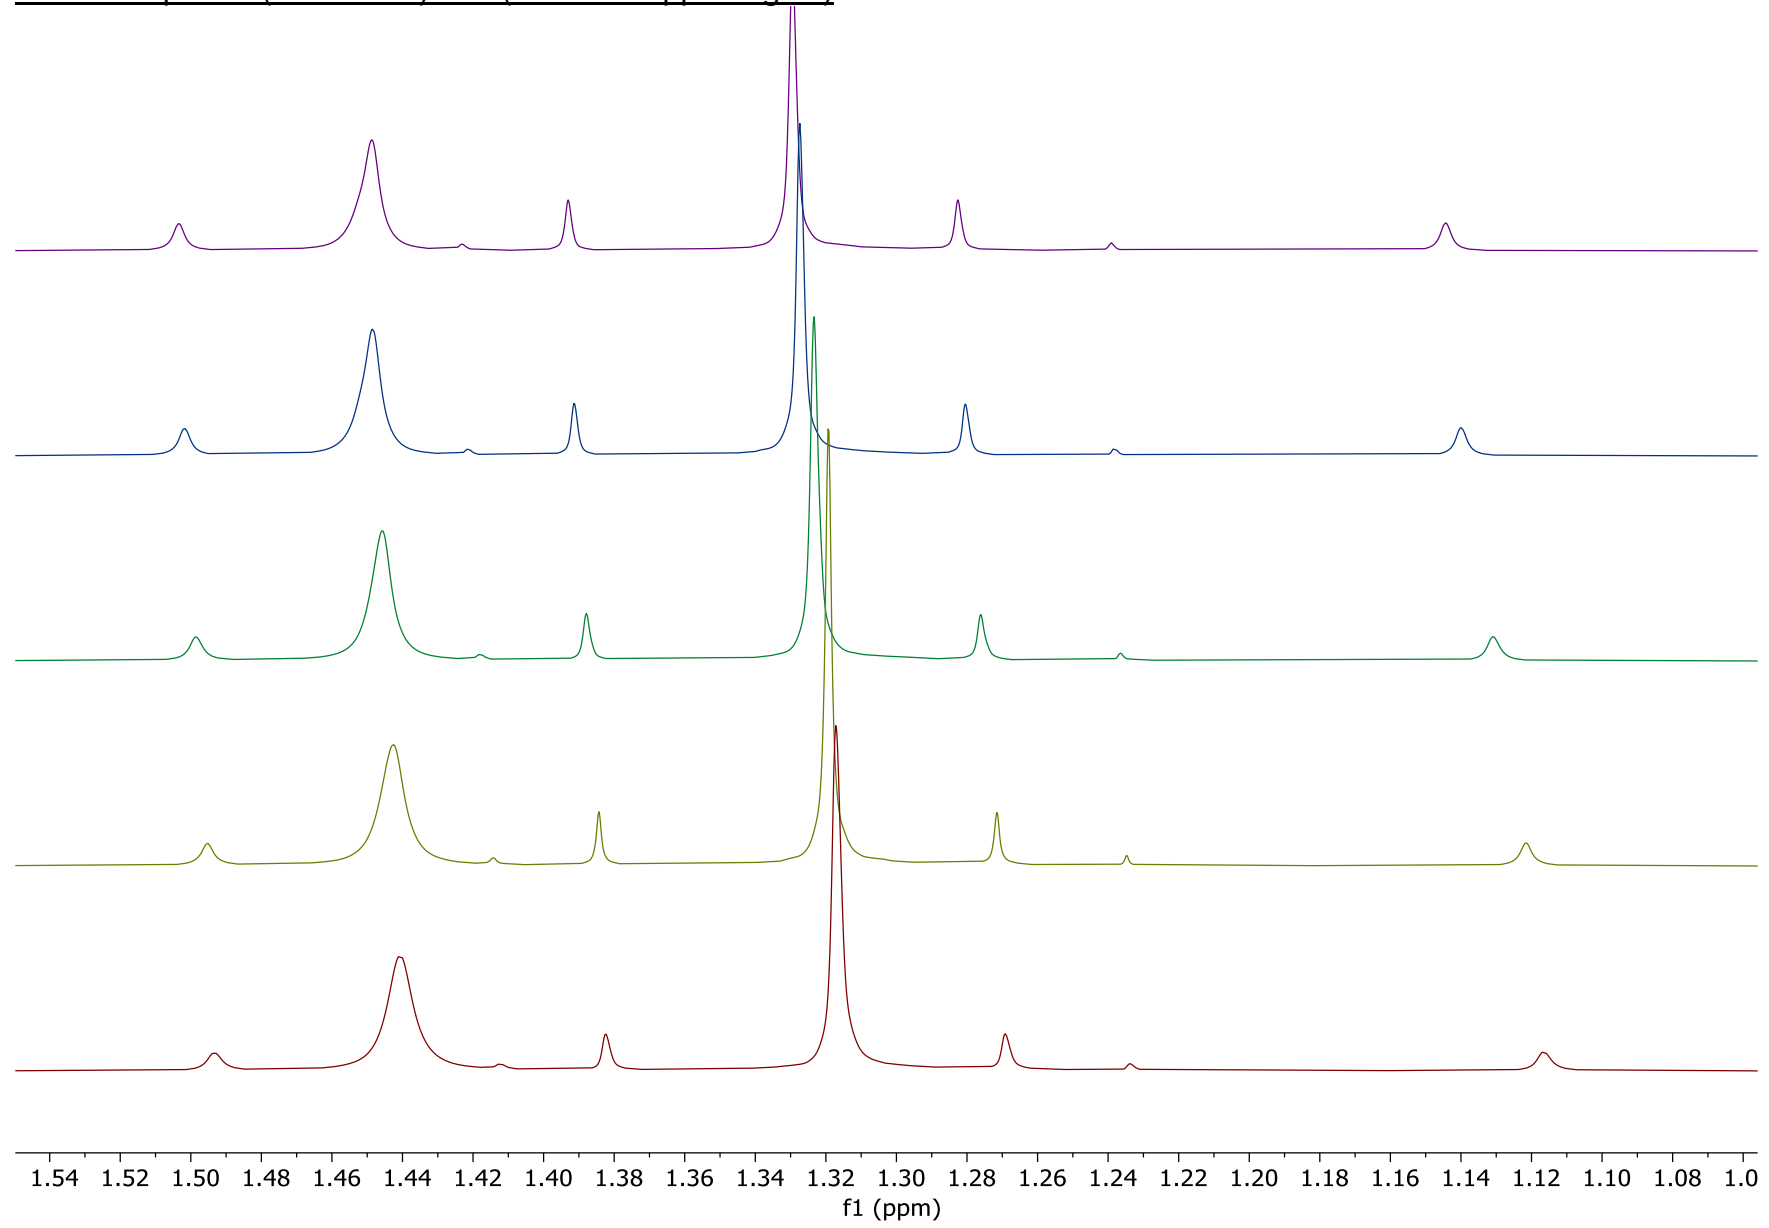

S22

Compound 1 DOSY spectrum  
**Full spectrum**

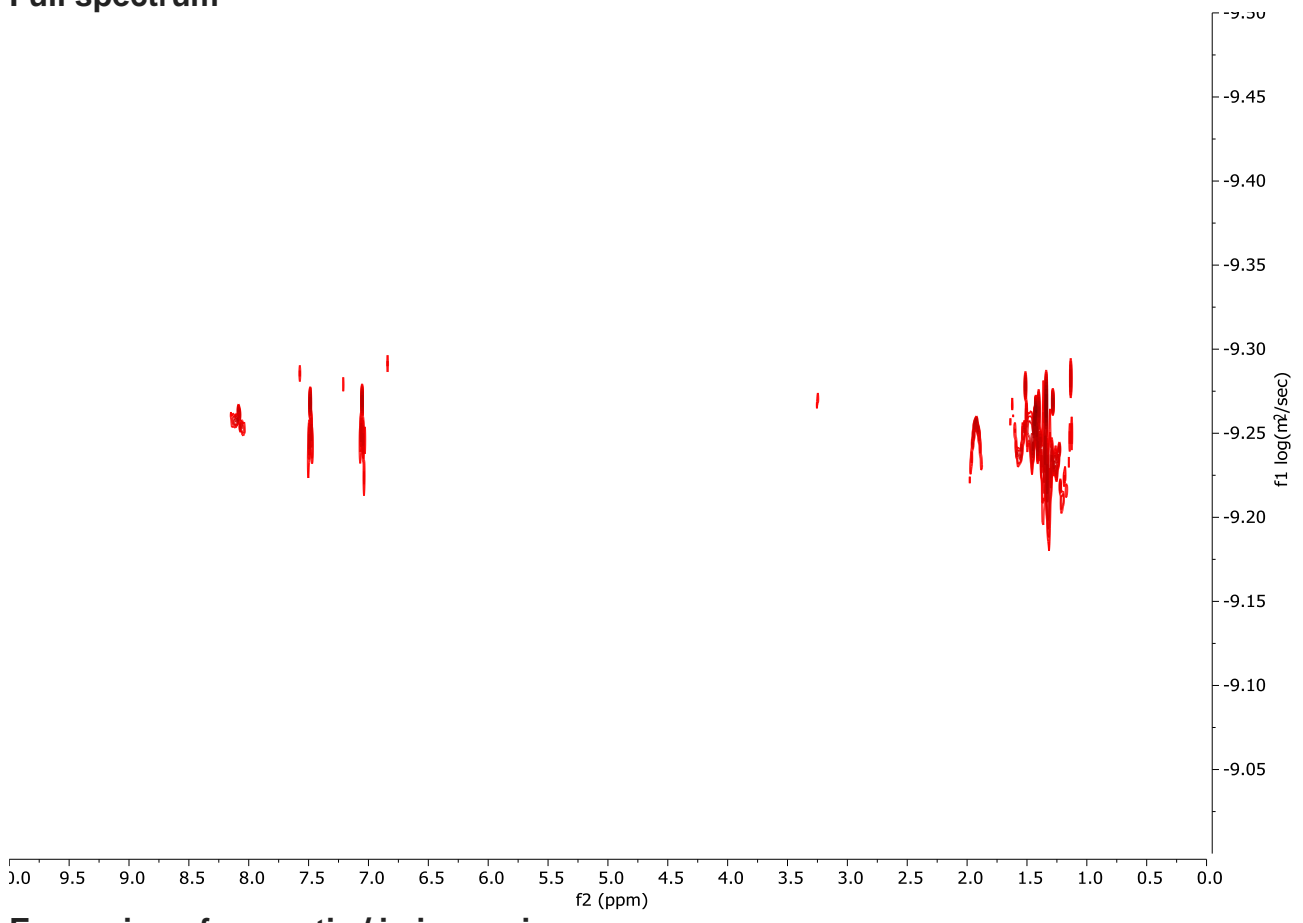

**Expansion of aromatic / imine region**

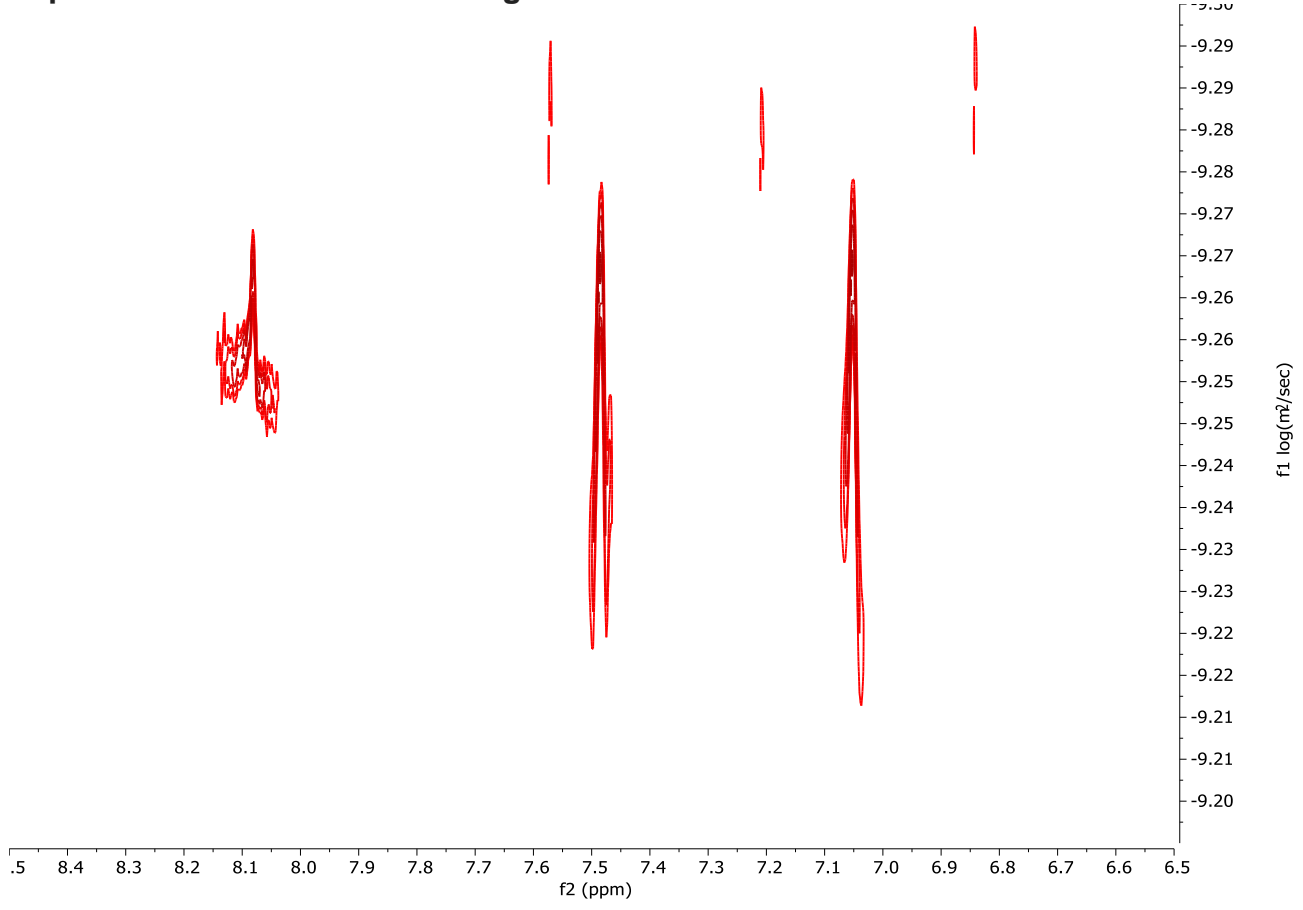

| <b>Peak assignment</b>      | <b>ppm</b> | <b>Diffusion coefficient (m<sup>2</sup> s<sup>-1</sup>)</b> |
|-----------------------------|------------|-------------------------------------------------------------|
| Imine (major species)       | 8.1        | 5.4 x 10 <sup>-10</sup>                                     |
| Imine (minor species)       | 7.6        | 5.0 x 10 <sup>-10</sup>                                     |
| Aromatic CH (major species) | 7.5        | 5.4 x 10 <sup>-10</sup>                                     |
| Chloroform                  | 7.3        | 2.0 x 10 <sup>-9</sup>                                      |
| Aromatic CH (minor species) | 7.2        | 5.1 x 10 <sup>-10</sup>                                     |
| Aromatic CH (major species) | 7.1        | 5.4 x 10 <sup>-10</sup>                                     |
| Aromatic CH (minor species) | 6.8        | 5.1 x 10 <sup>-10</sup>                                     |

The other signals for the minor species present in Figure 7 are not resolved in the DOSY spectrum due to the lower frequency domain resolution used.

The DOSY experiment was performed on a 600 MHz spectrometer at 298K. The Bruker pulse sequence ledbpgp2s was used, which contains bipolar gradient pulses and an eddy current delay. The diffusion delay was 60 ms, the gradient pulse length was 1 ms, and the delay between scans was 6 s. 16 Subspectra were acquired with linearly spaced gradient strengths, and were processed using MestreNova.



Compound 1.TFA <sup>1</sup>H NMR spectrum

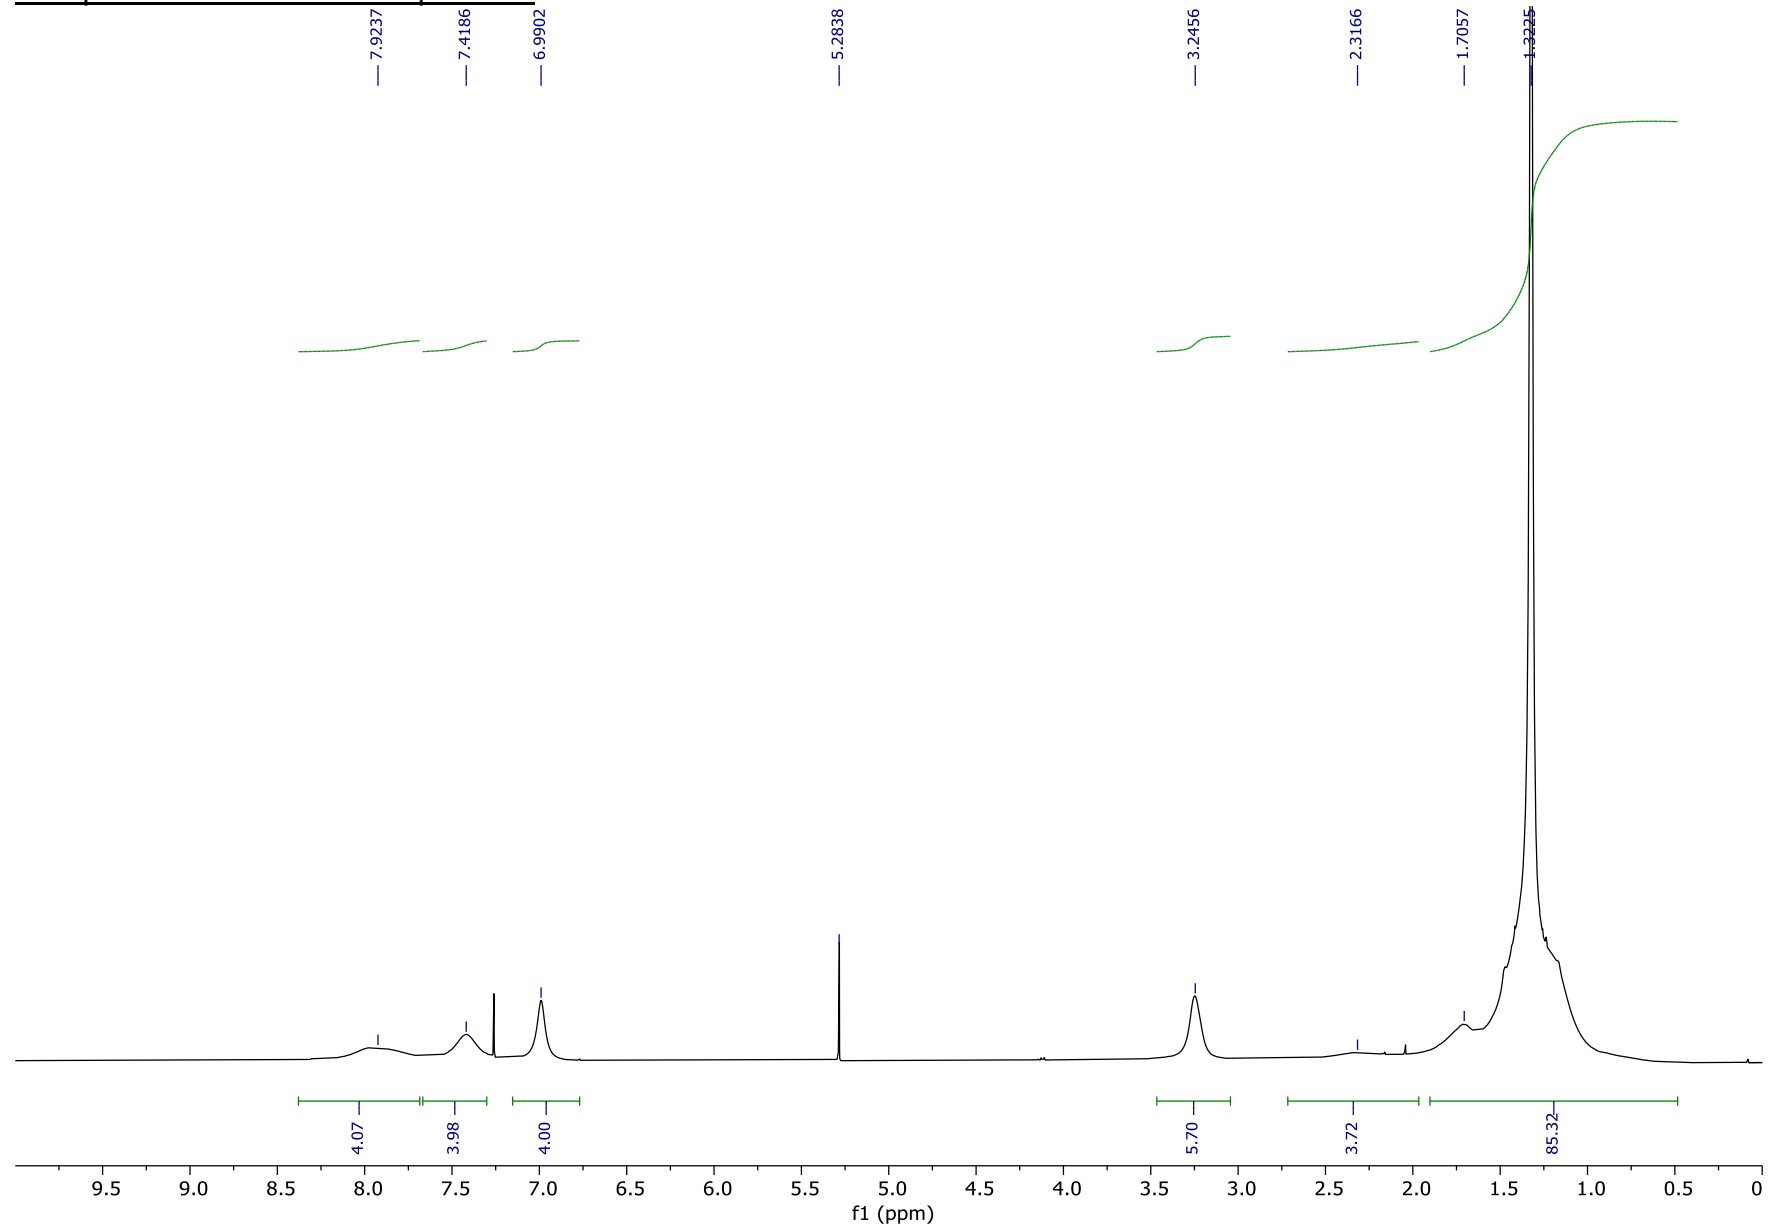

S25

VT NMR spectra (233-328 K) of 1.TFA (6.7–8.3 ppm region)

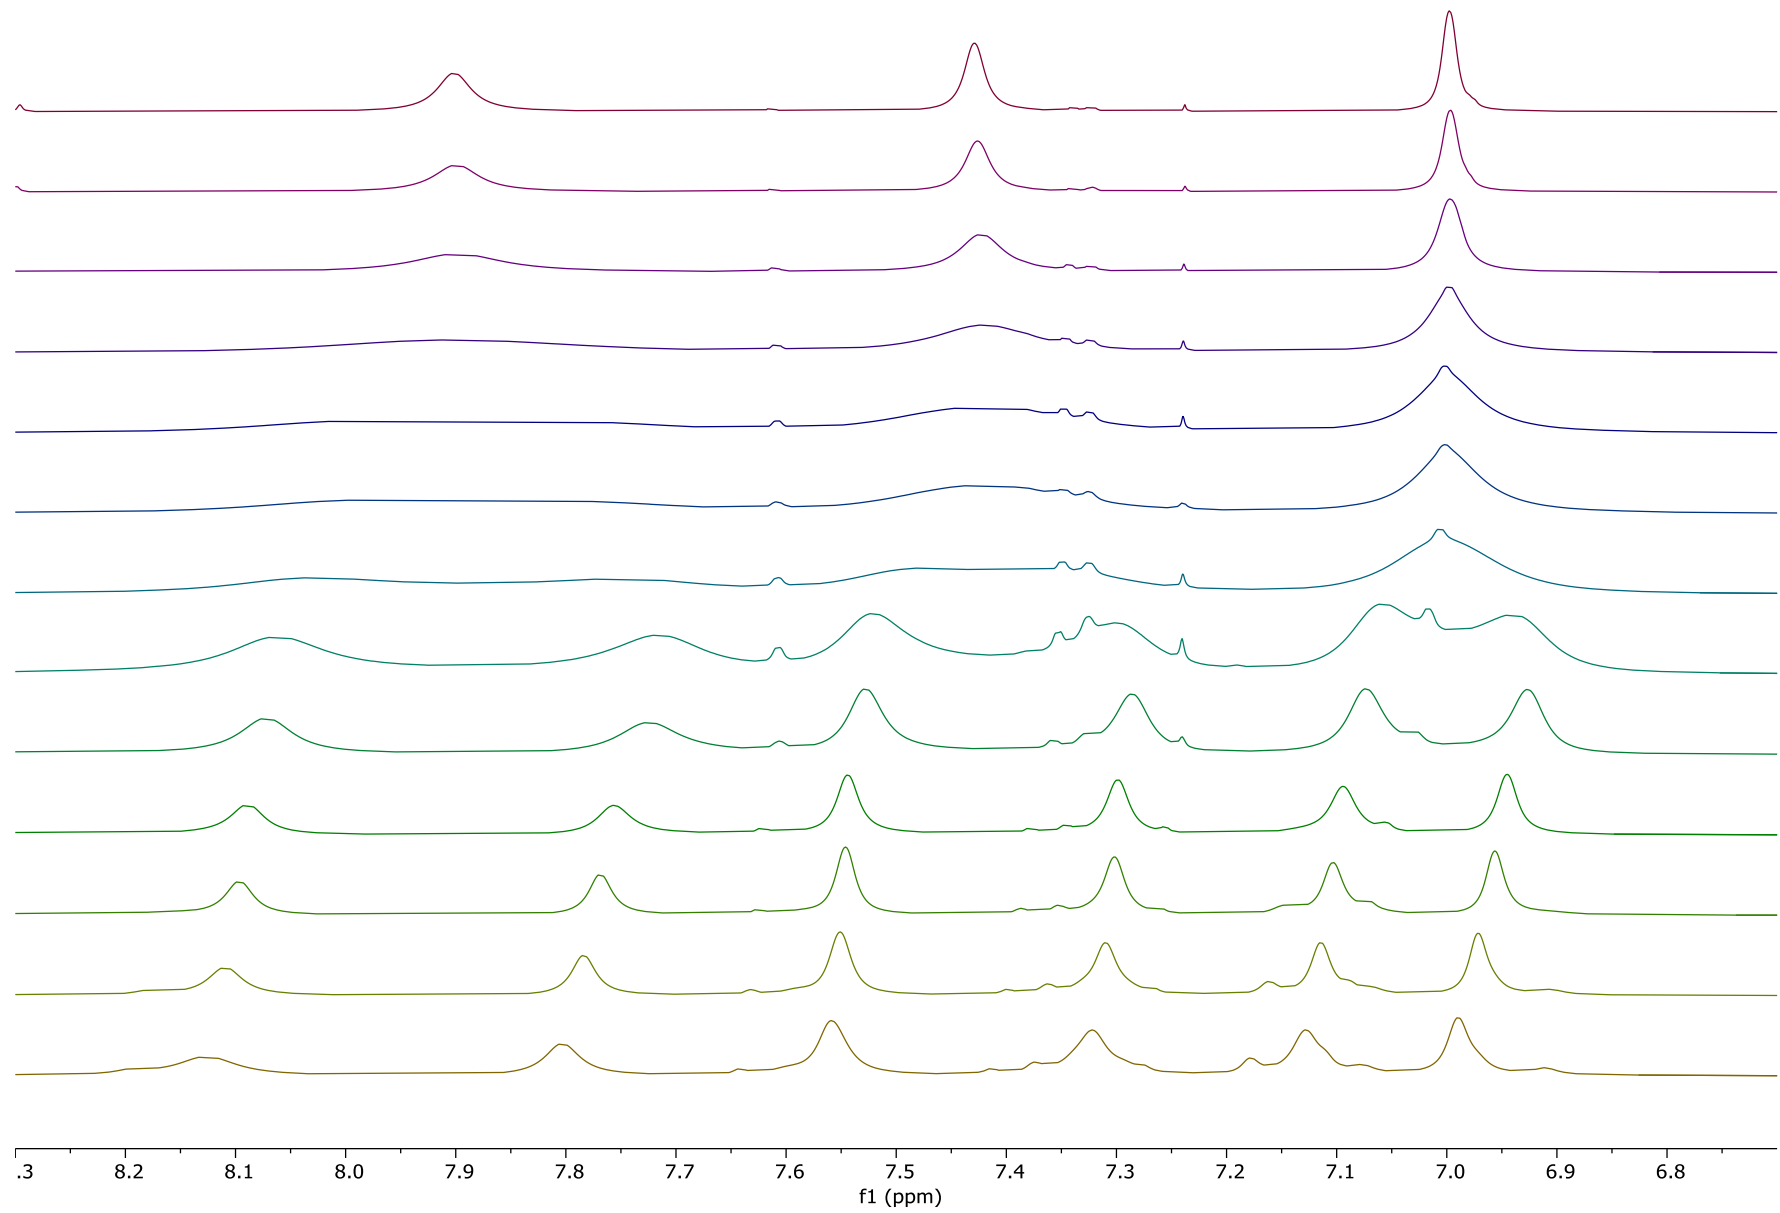

S26

VT NMR spectra (233-328 K) of 1.TFA (6.0–2.9 ppm region)

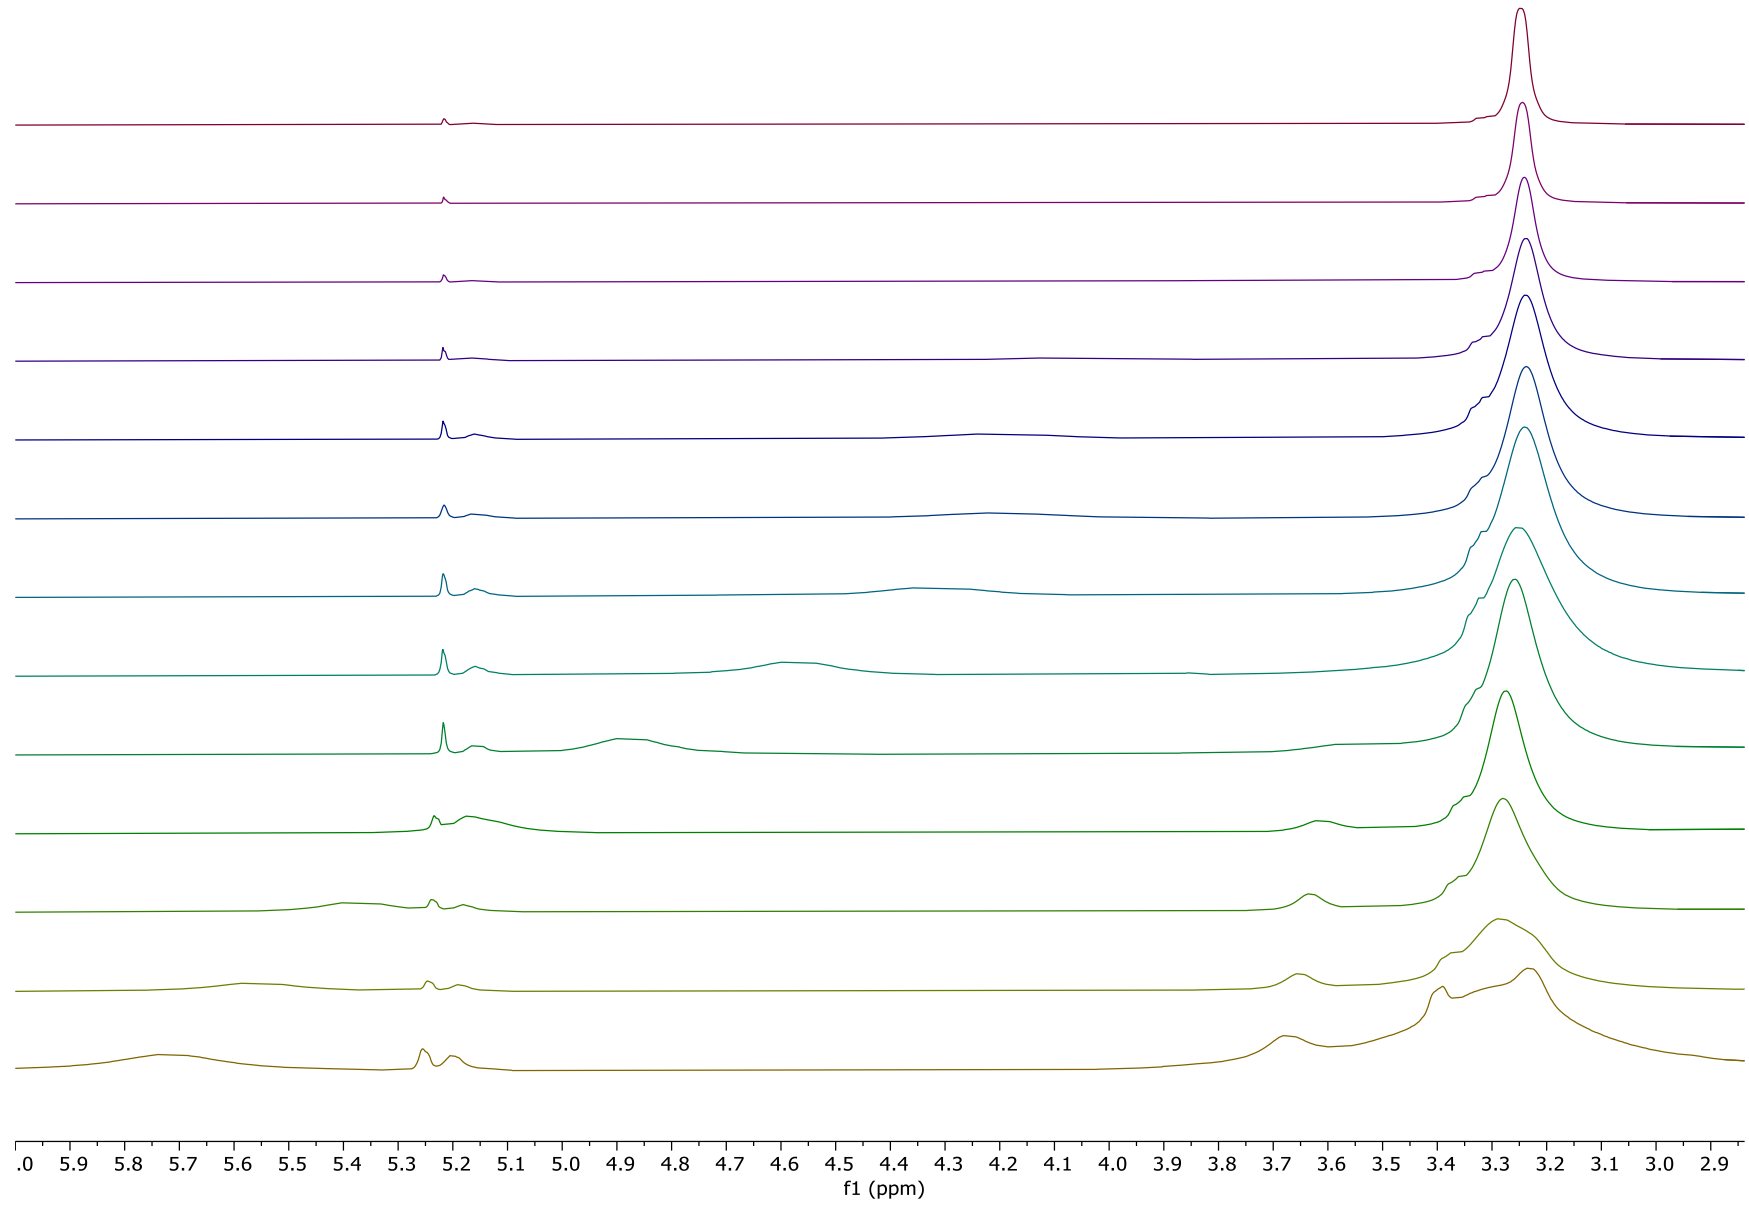

VT NMR spectra (233-328 K) of 1.TFA (2.9–0.2 ppm region) emphasising the changes in the signals in this region which do not correspond to *tert*-butyl groups

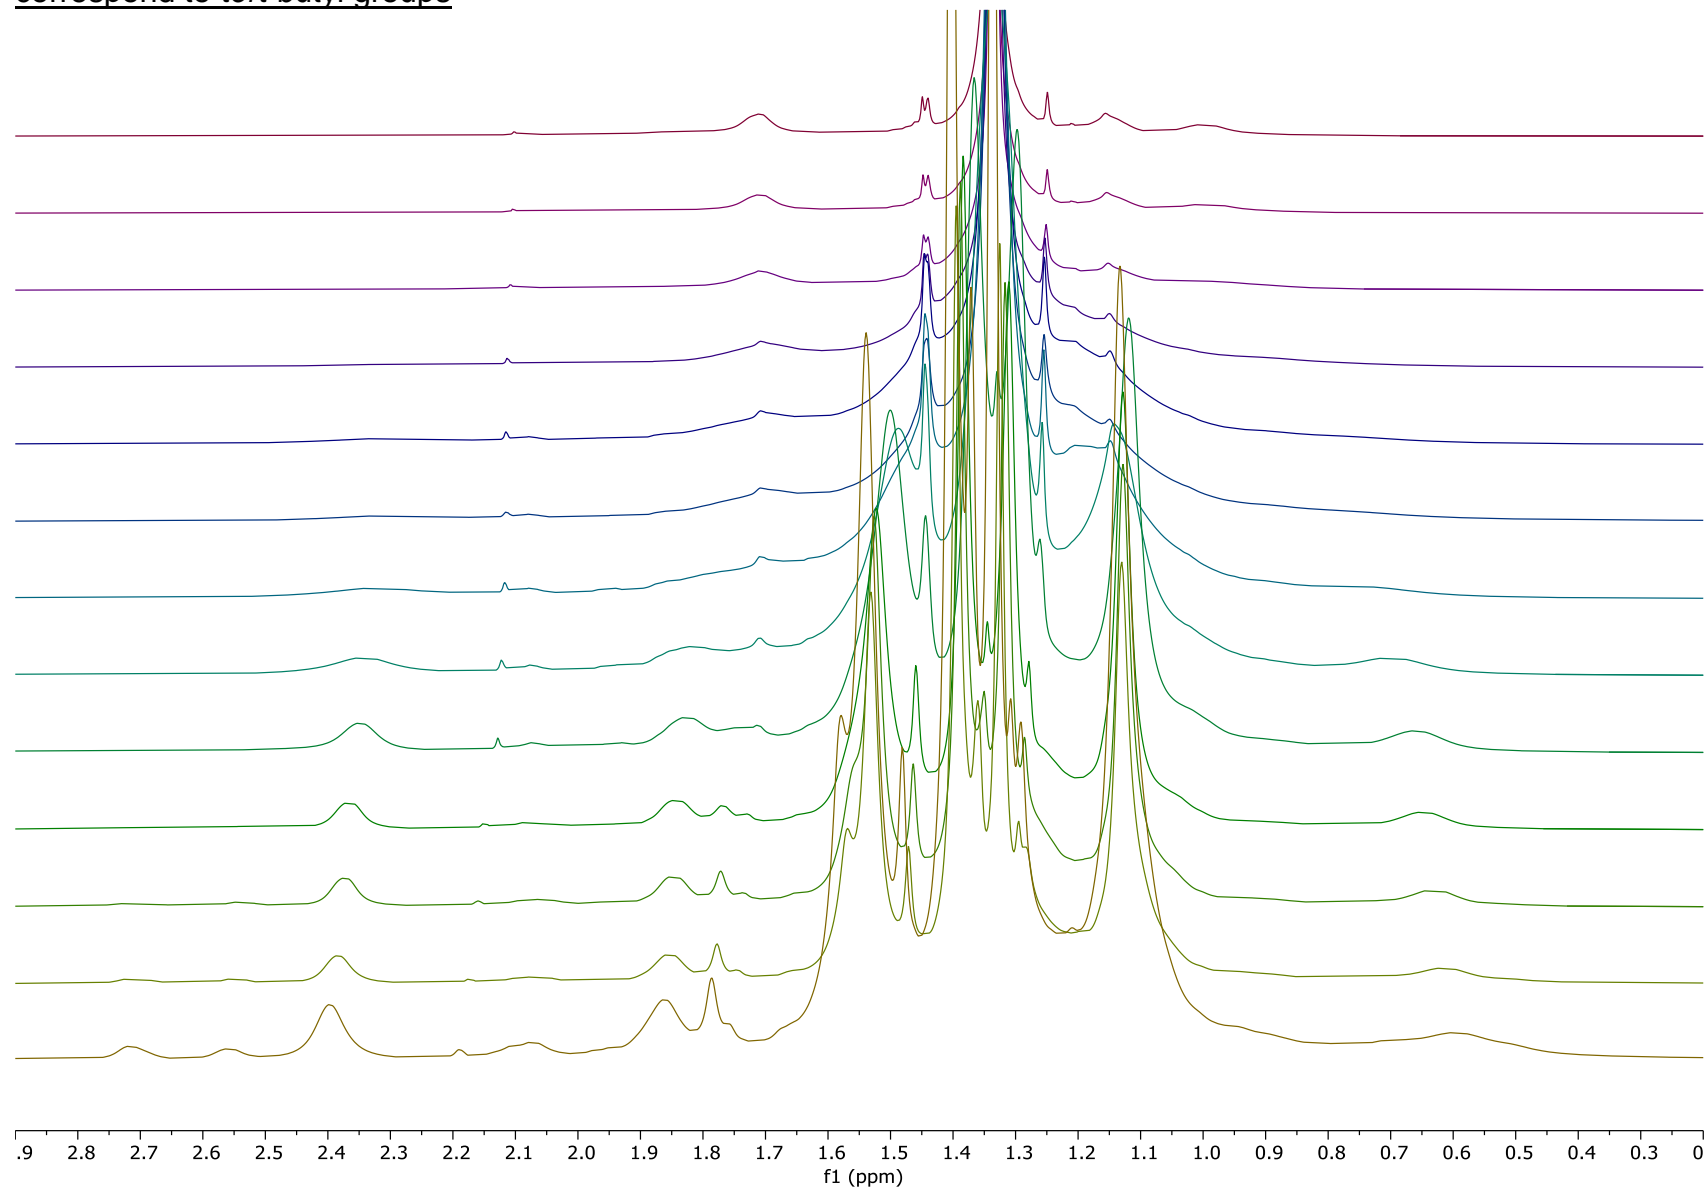

S28

VT NMR spectra (233-328 K) of 1.TFA (1.7–0.8 ppm region) emphasising the changes in the signals in this region correspond to *tert*-butyl groups

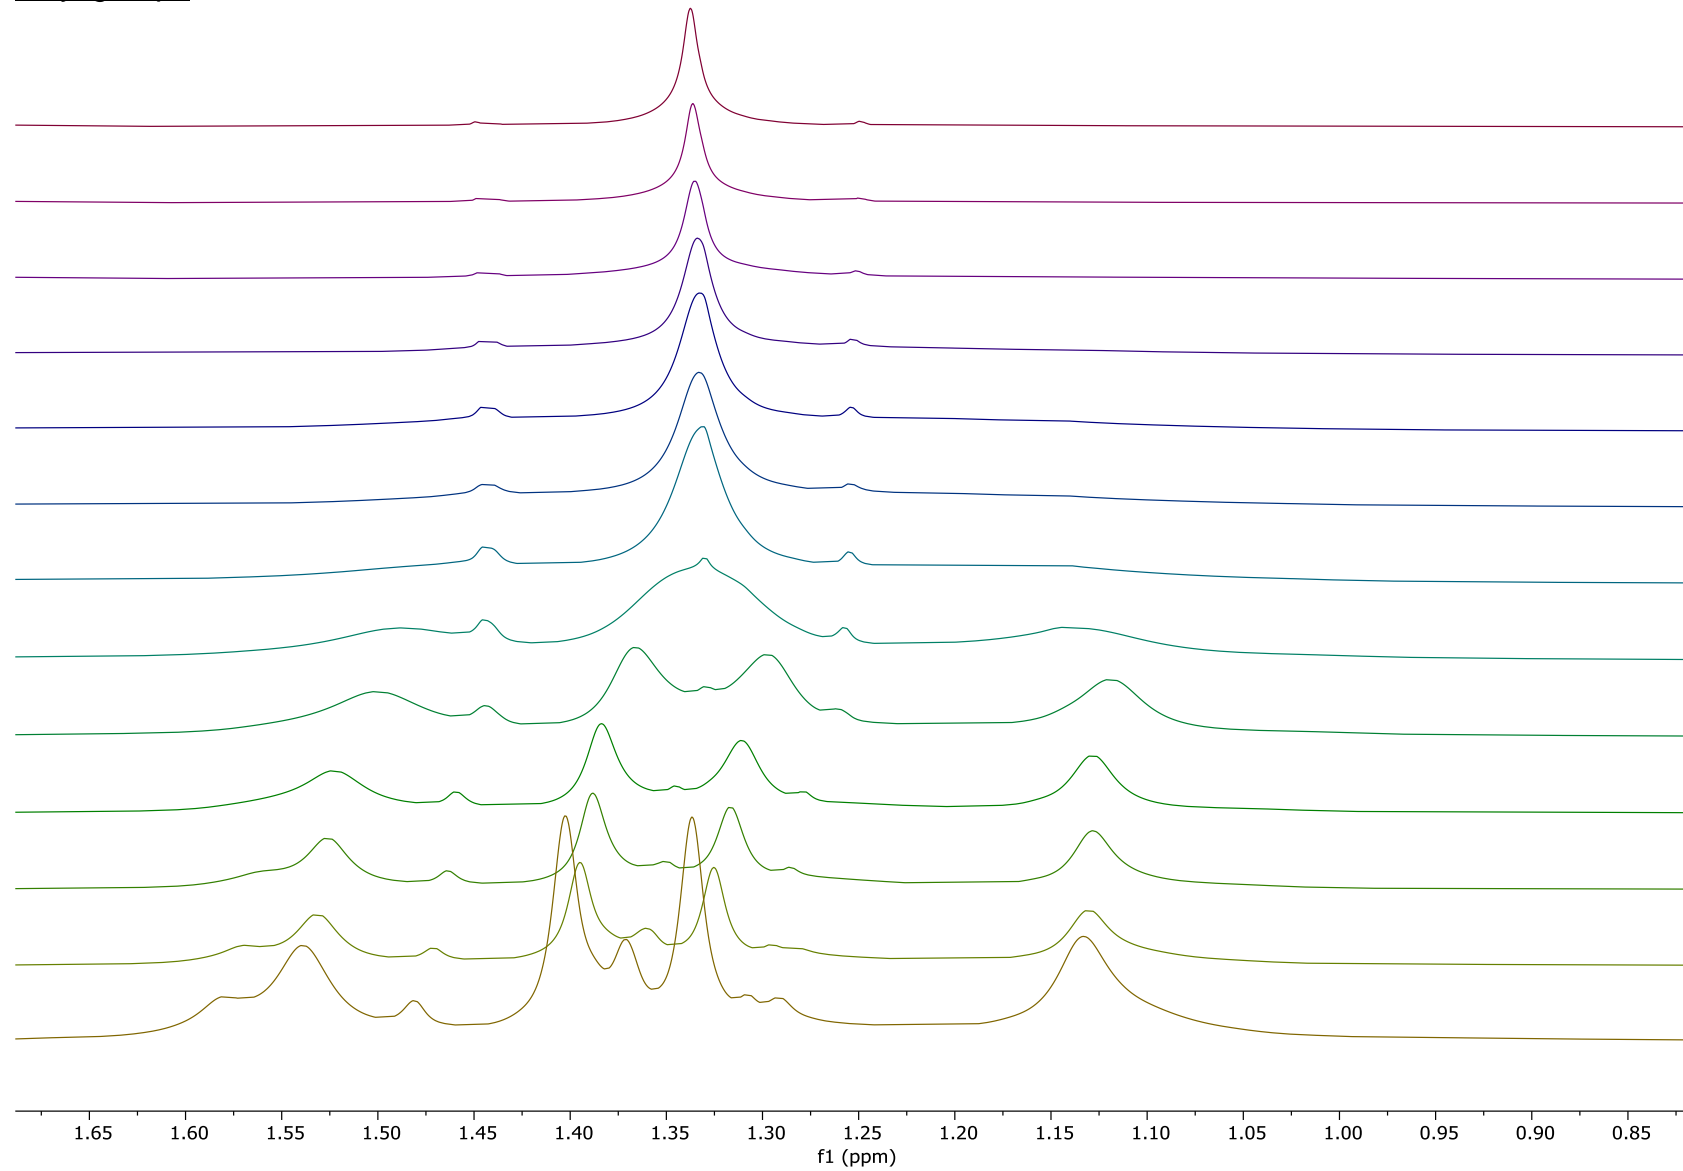

Compound 1.TFA <sup>13</sup>C NMR spectrum

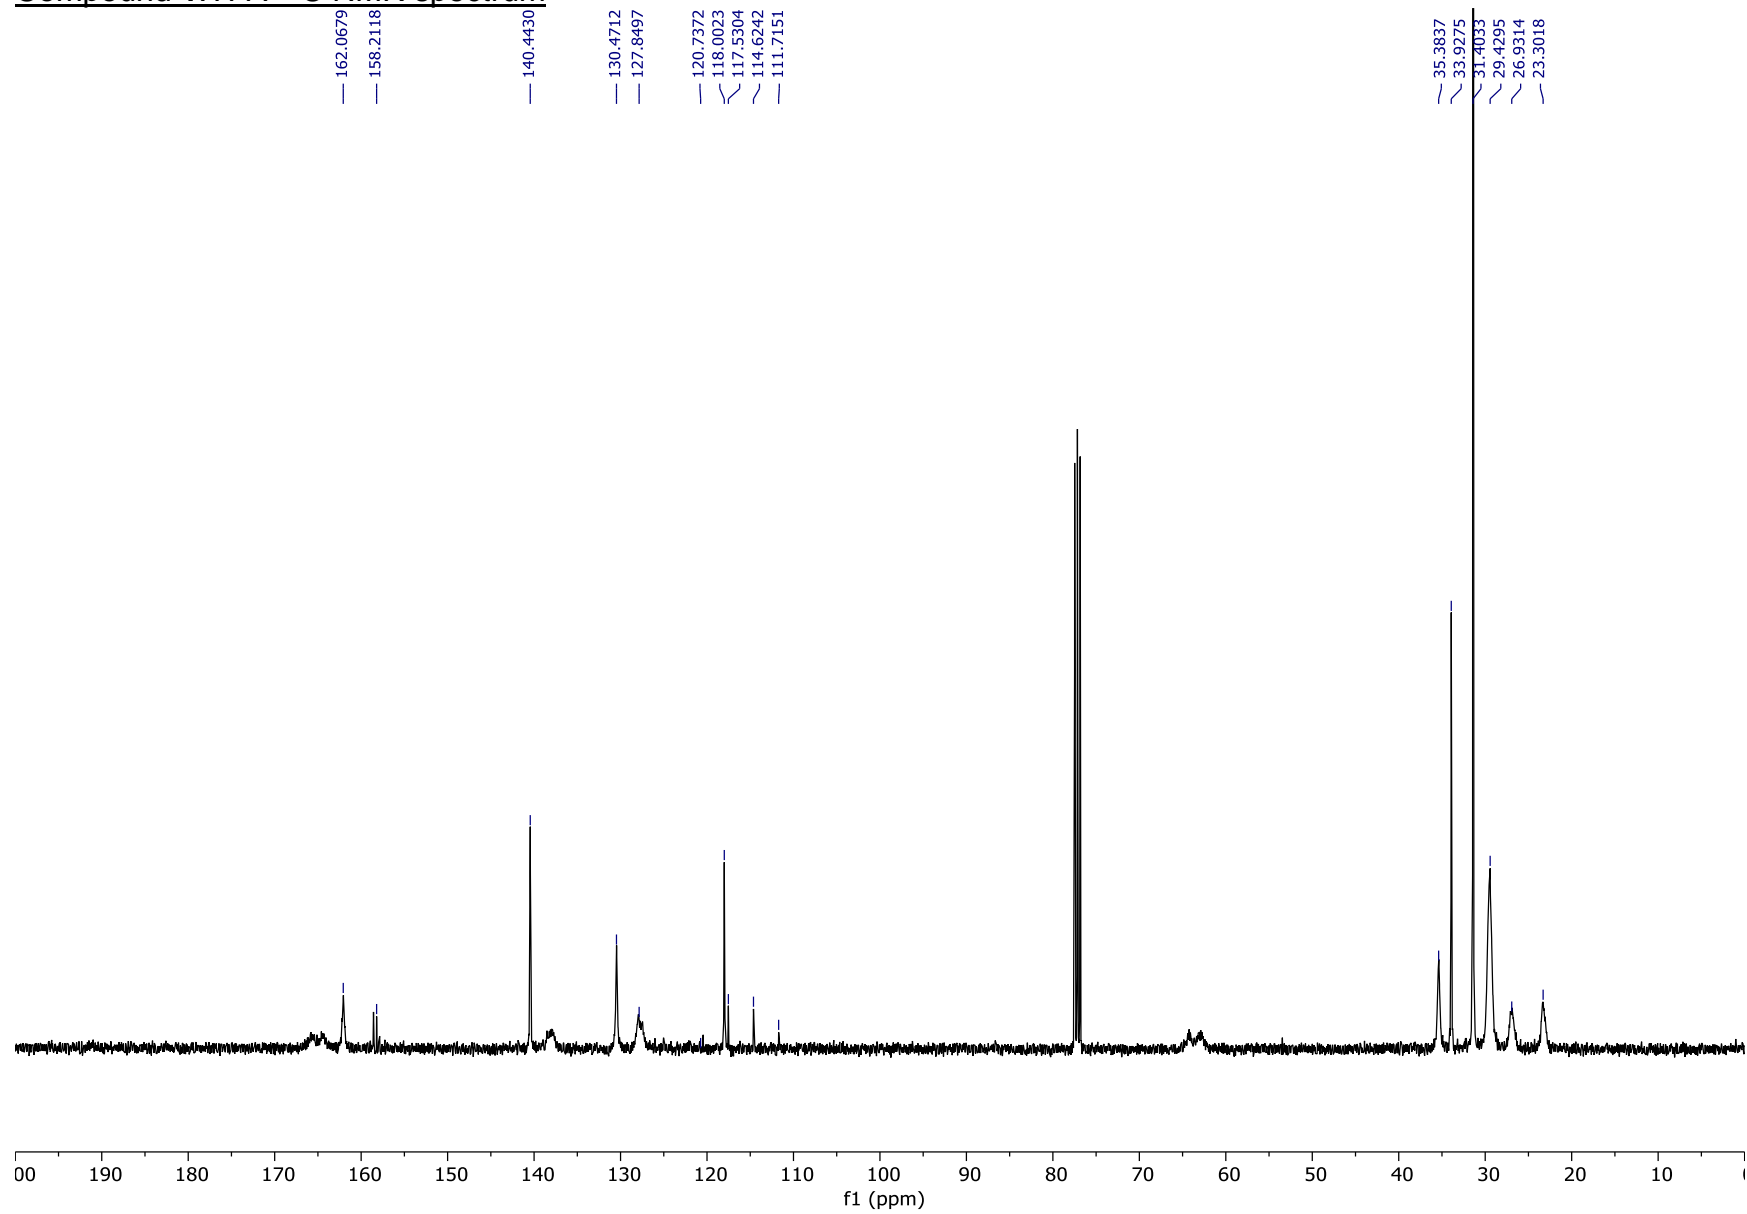

Compound 1.TFA  $^{19}\text{F}$  NMR spectrum

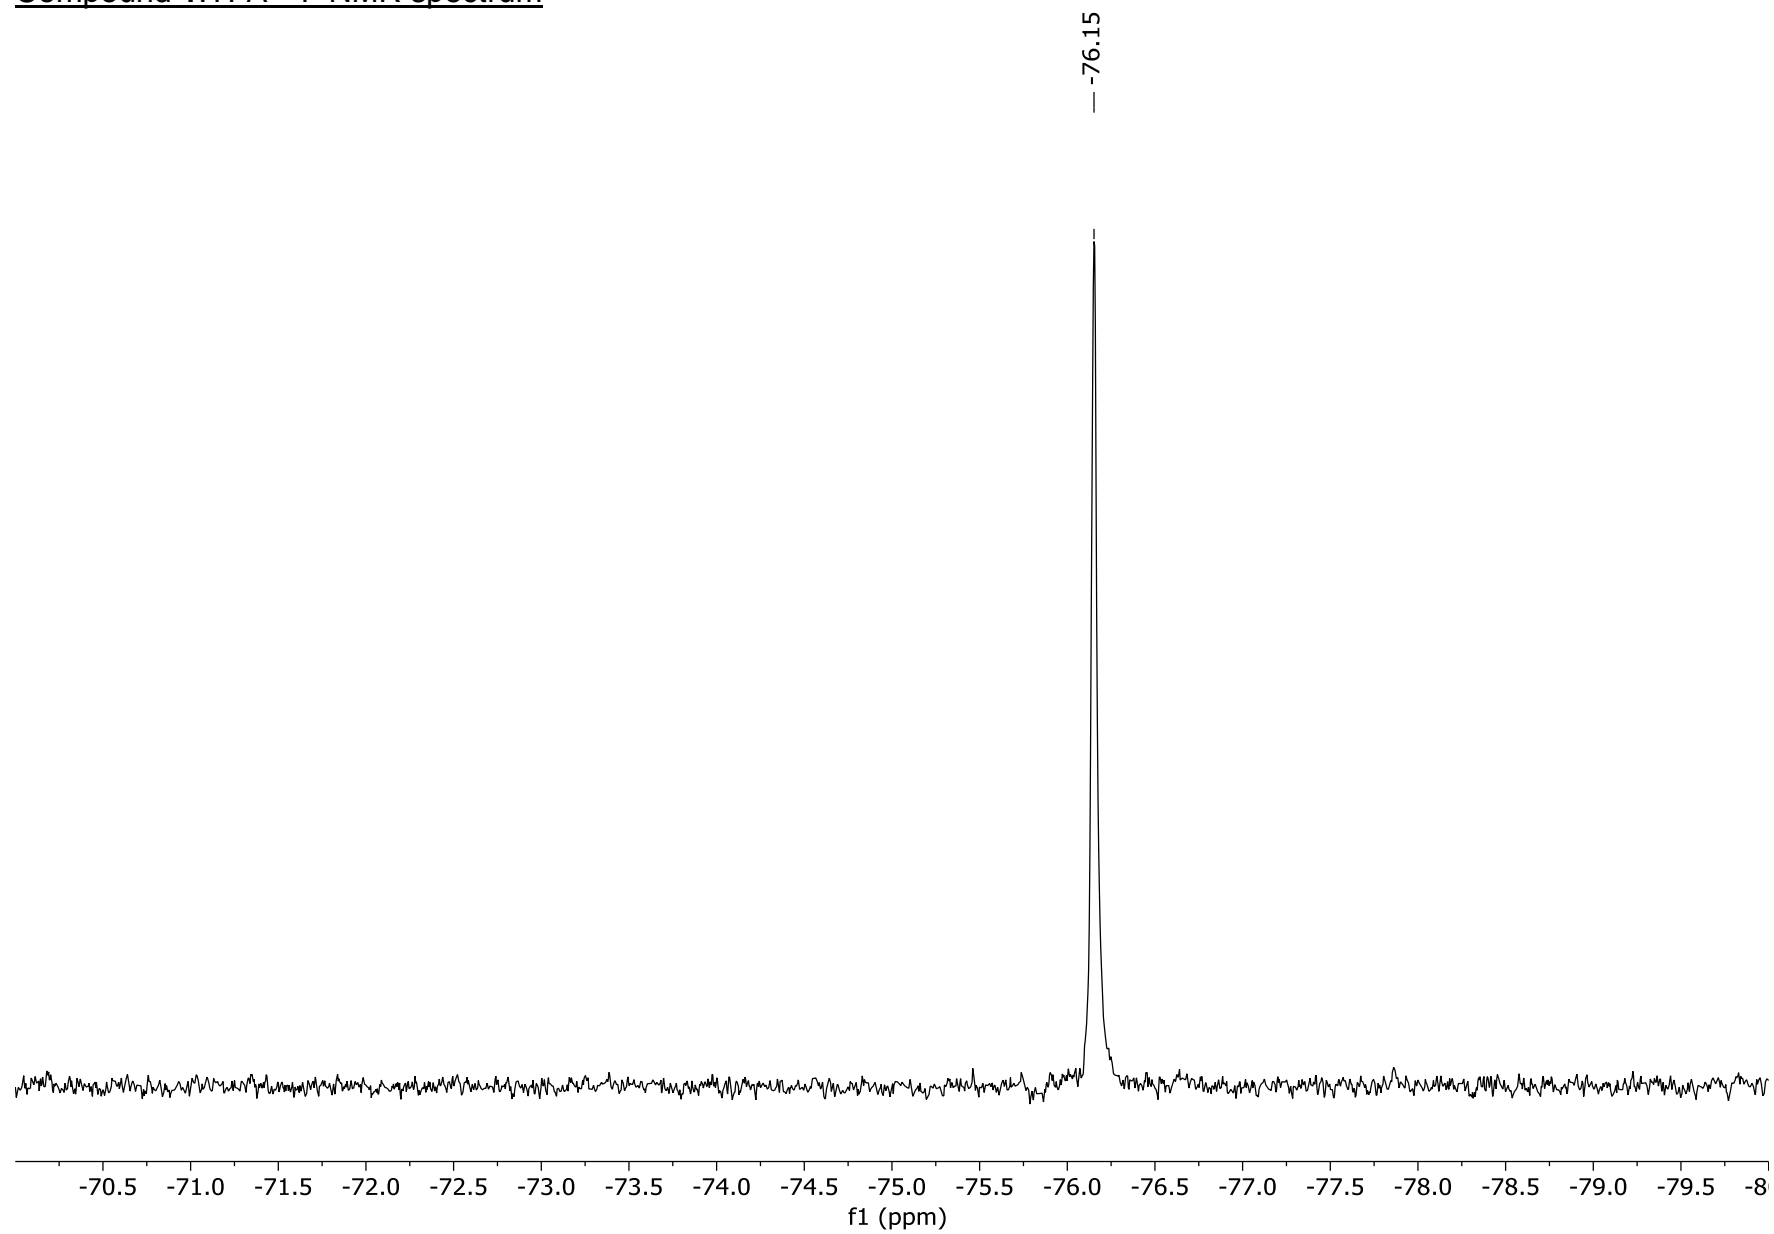

S31

**Compound 8** <sup>1</sup>H NMR spectrum

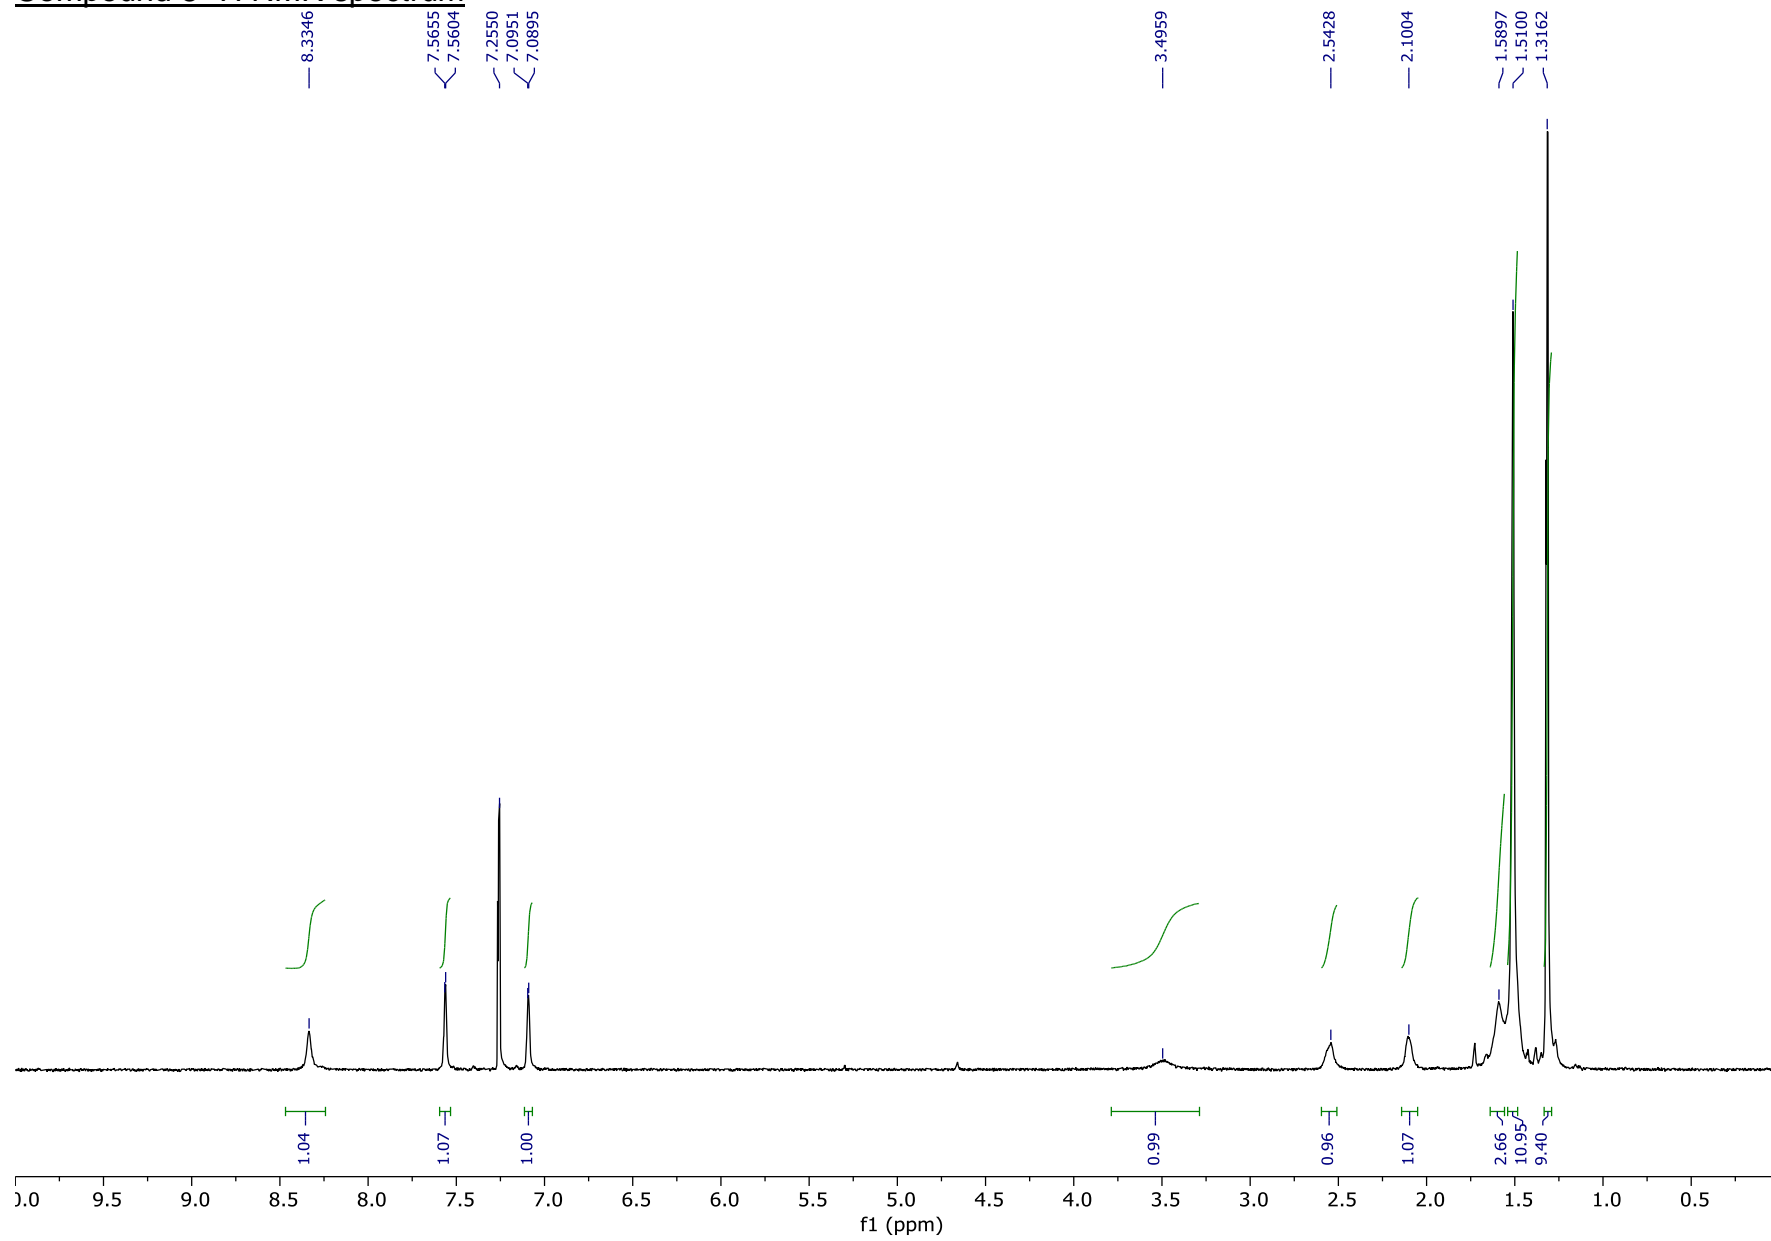



VT NMR spectra (218-298 K) of **8** (6.7–8.3 ppm region)

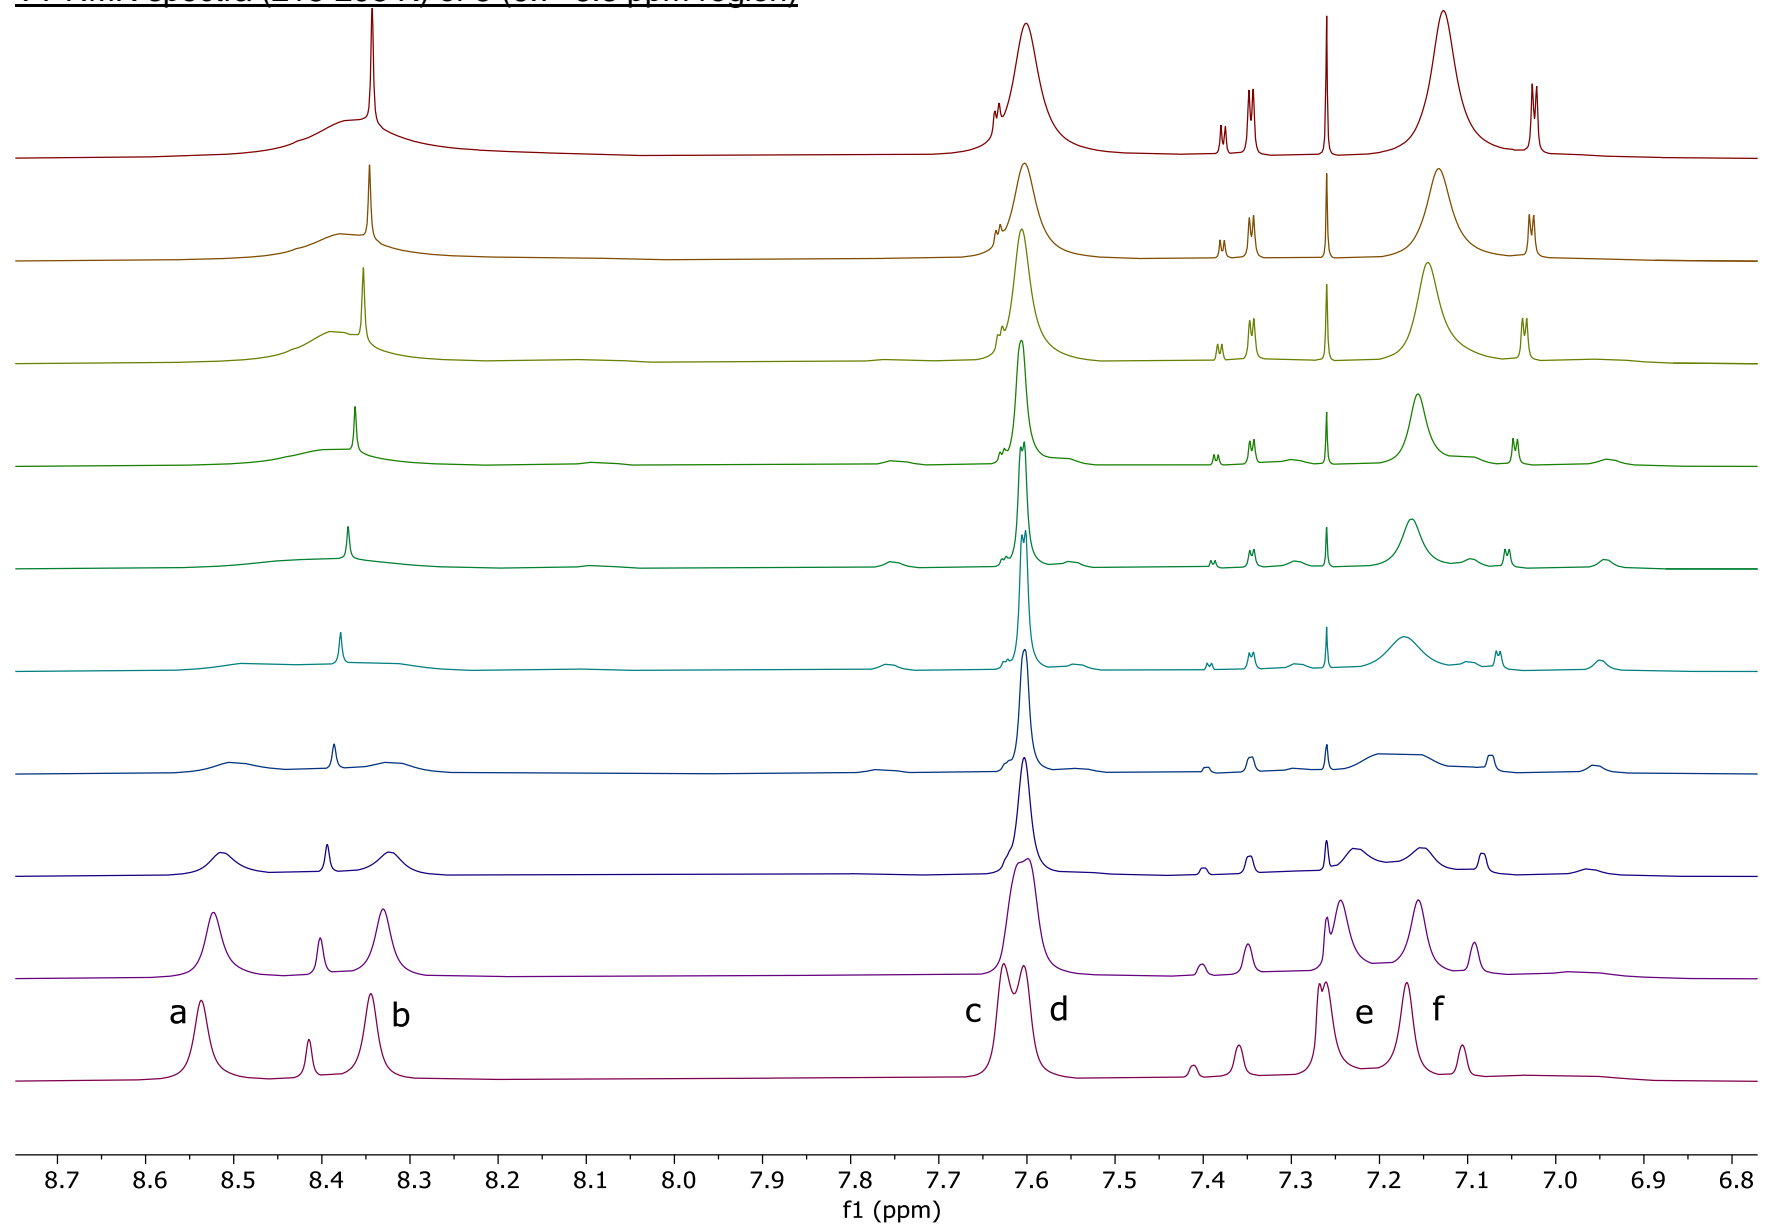

VT NMR spectra (218-298 K) of **8** (4.5–2.0 ppm region)

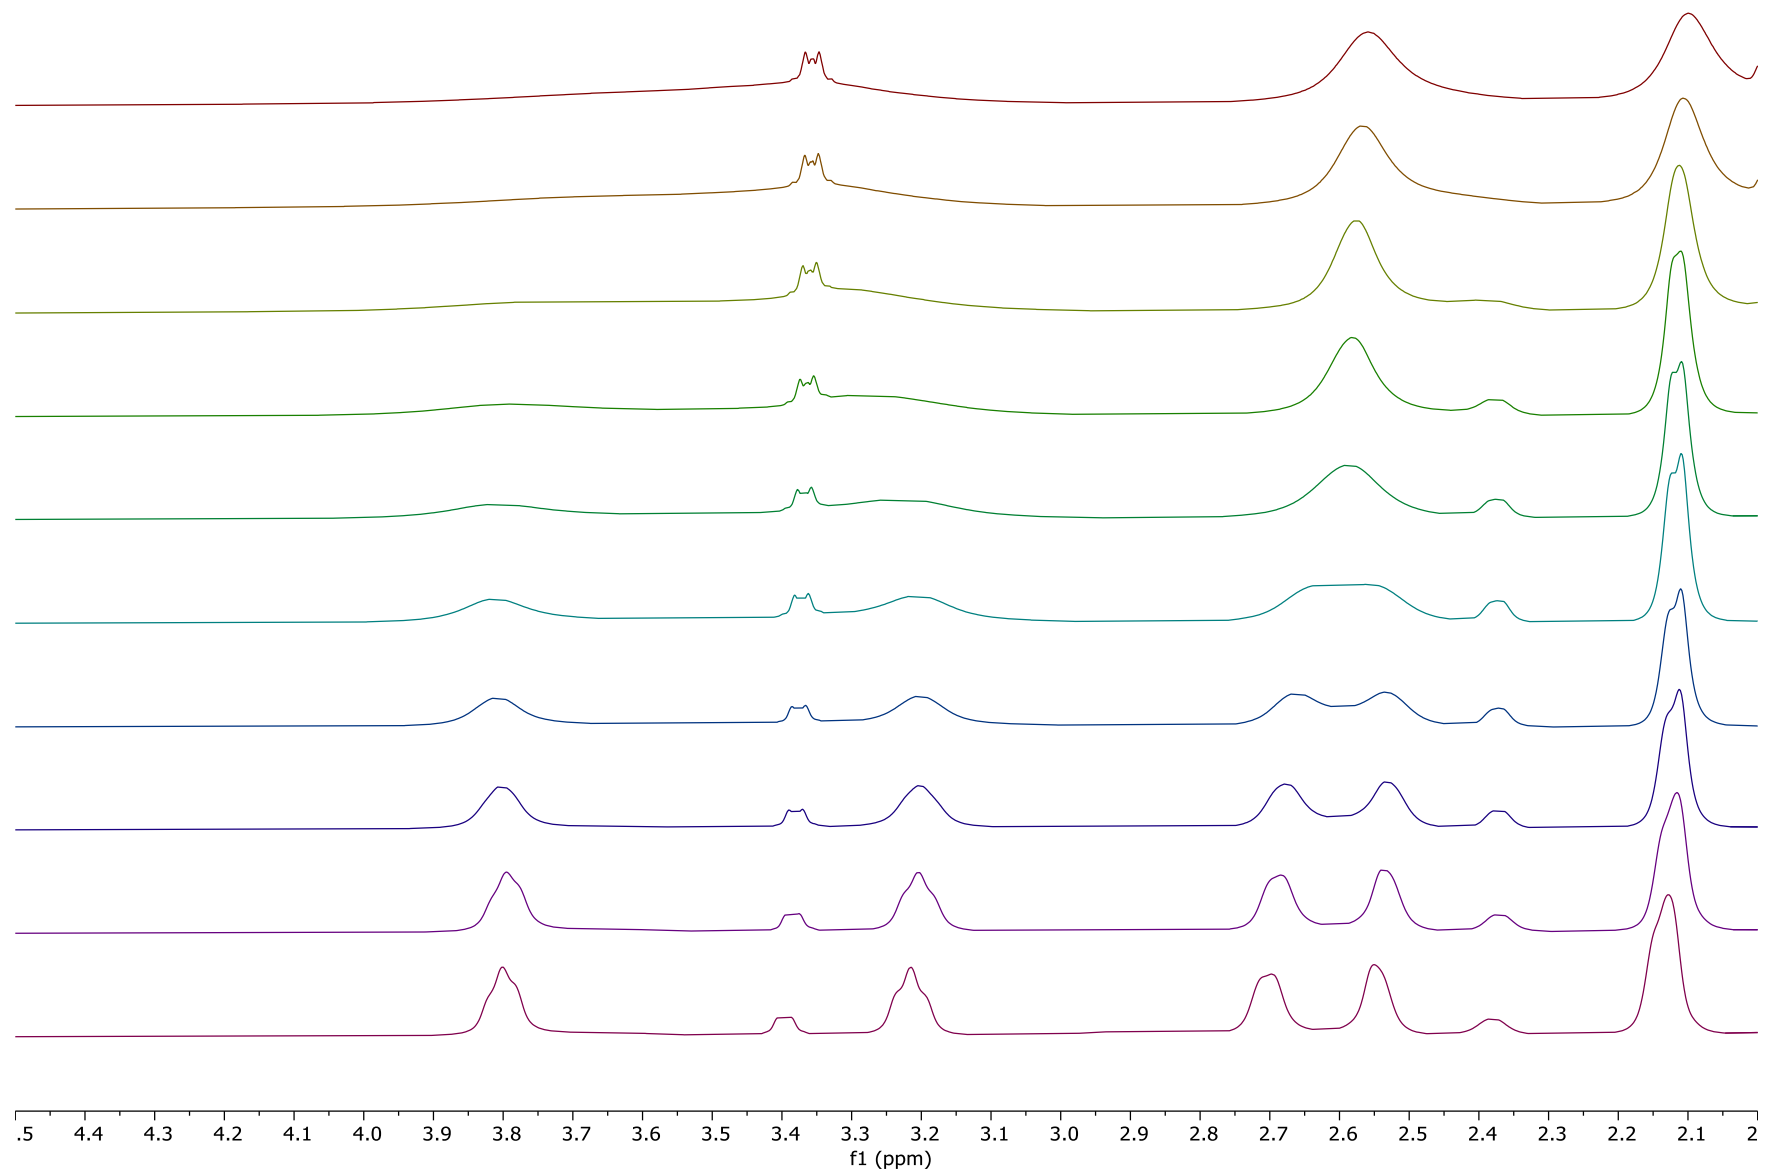

VT NMR spectra (218-298 K) of **8** (3.0–0.5 ppm region) emphasising the changes in the signals in this region which do not correspond to *tert*-butyl groups

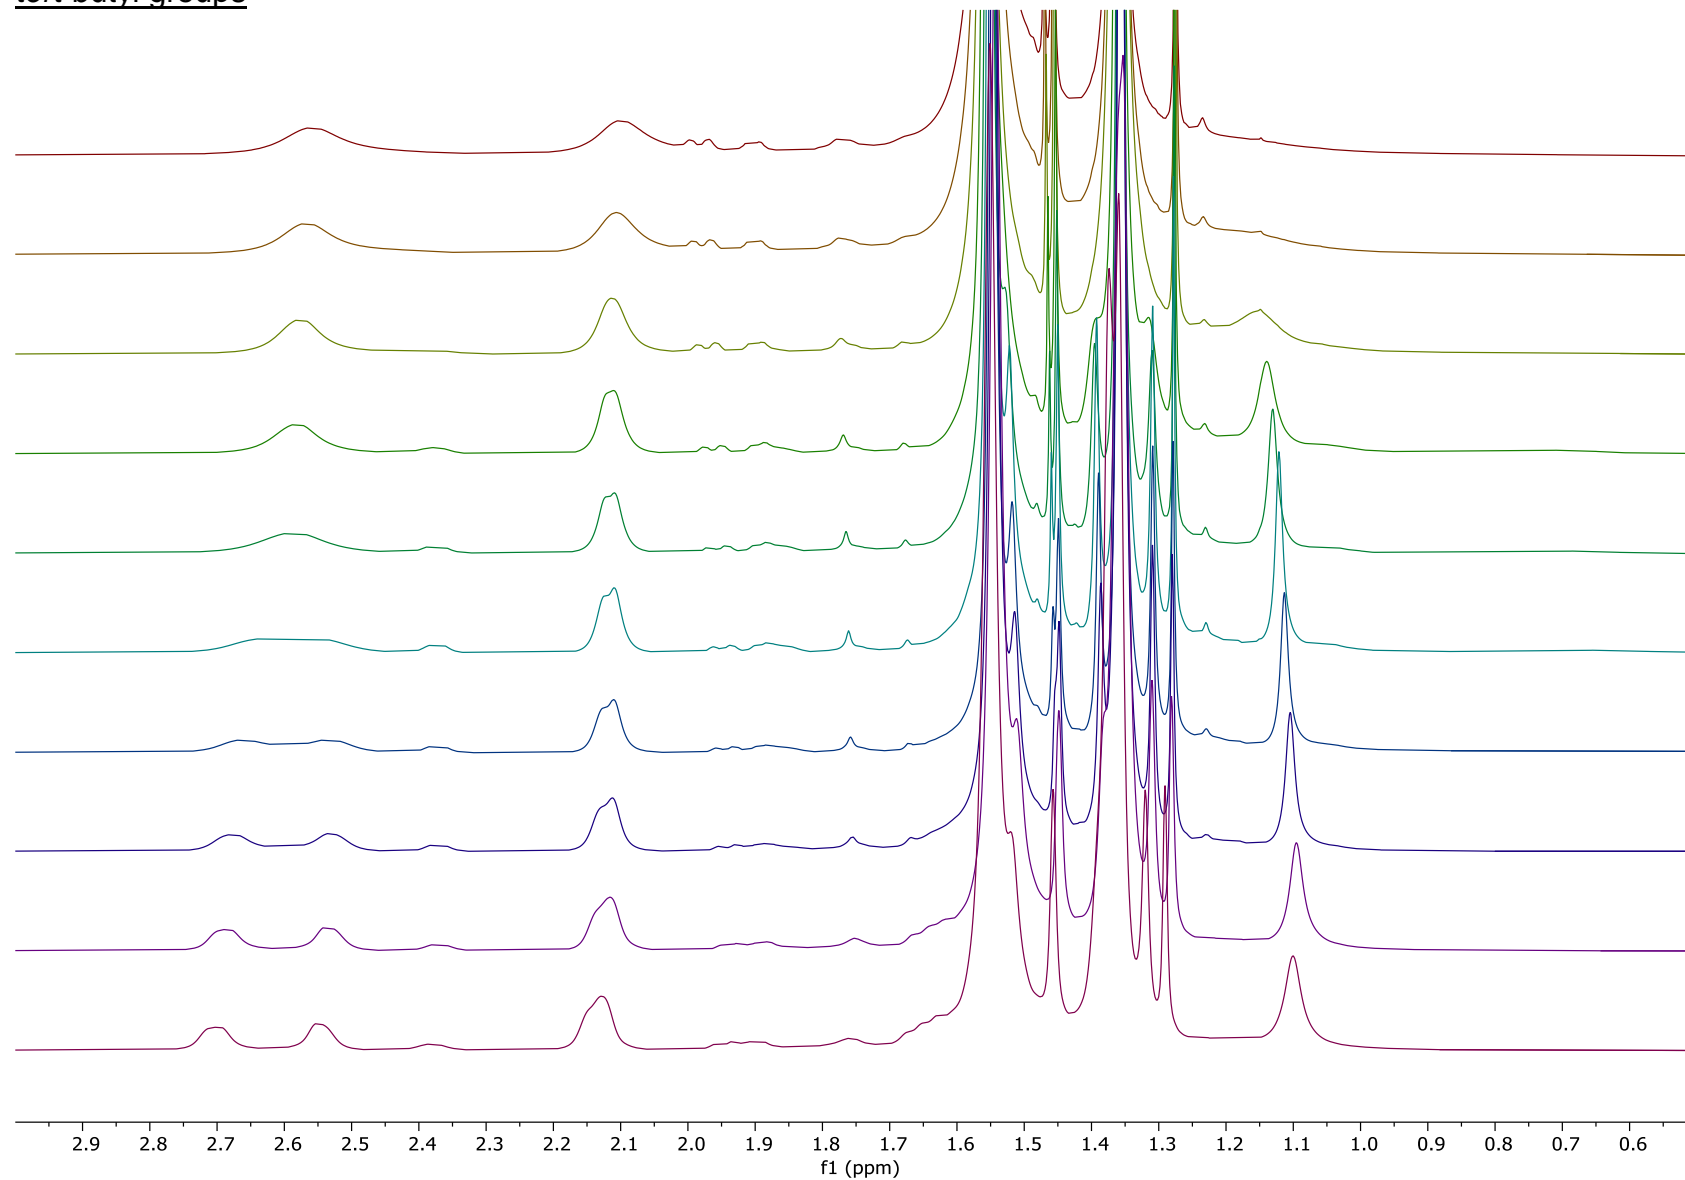

S35

VT NMR spectra (218-298 K) of **8** (3.0–0.5 ppm region) emphasising the changes in the *tert*-butyl signals

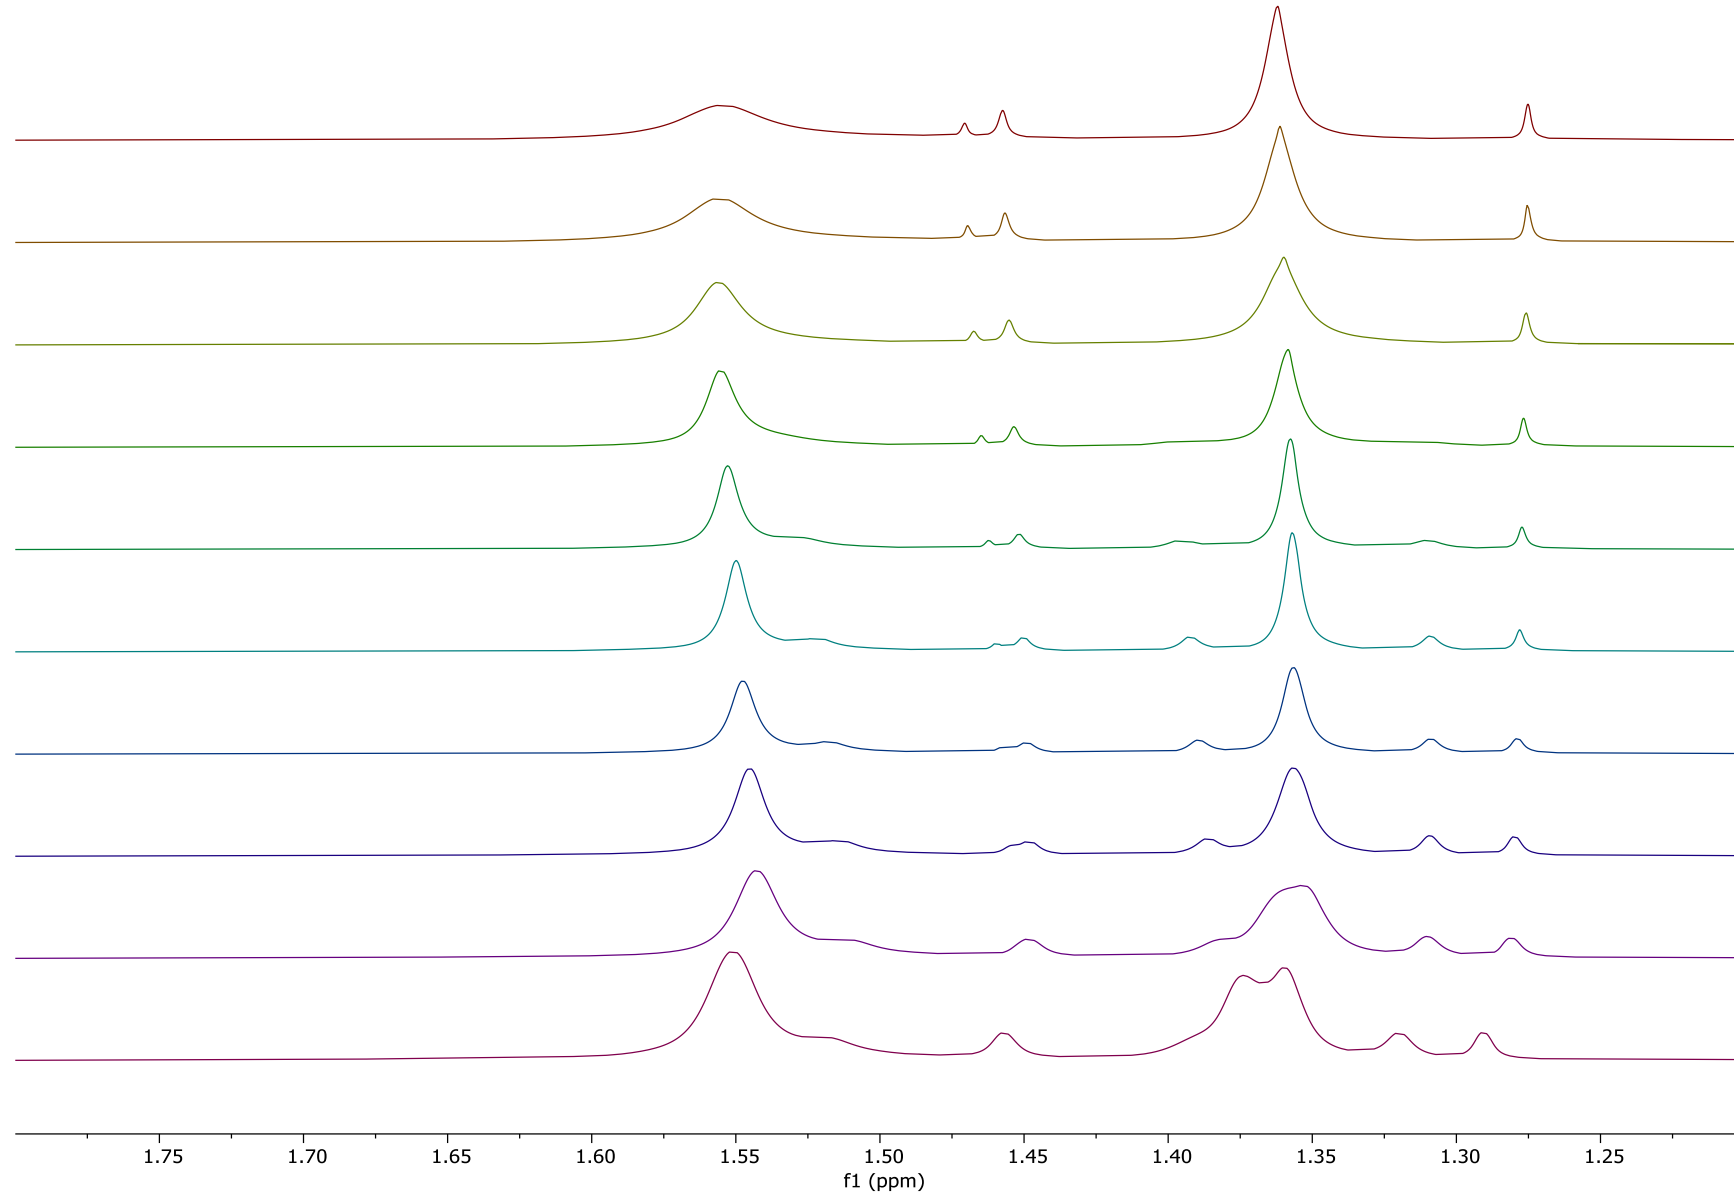

**Compound 8**  $^{13}\text{C}$  NMR spectrum

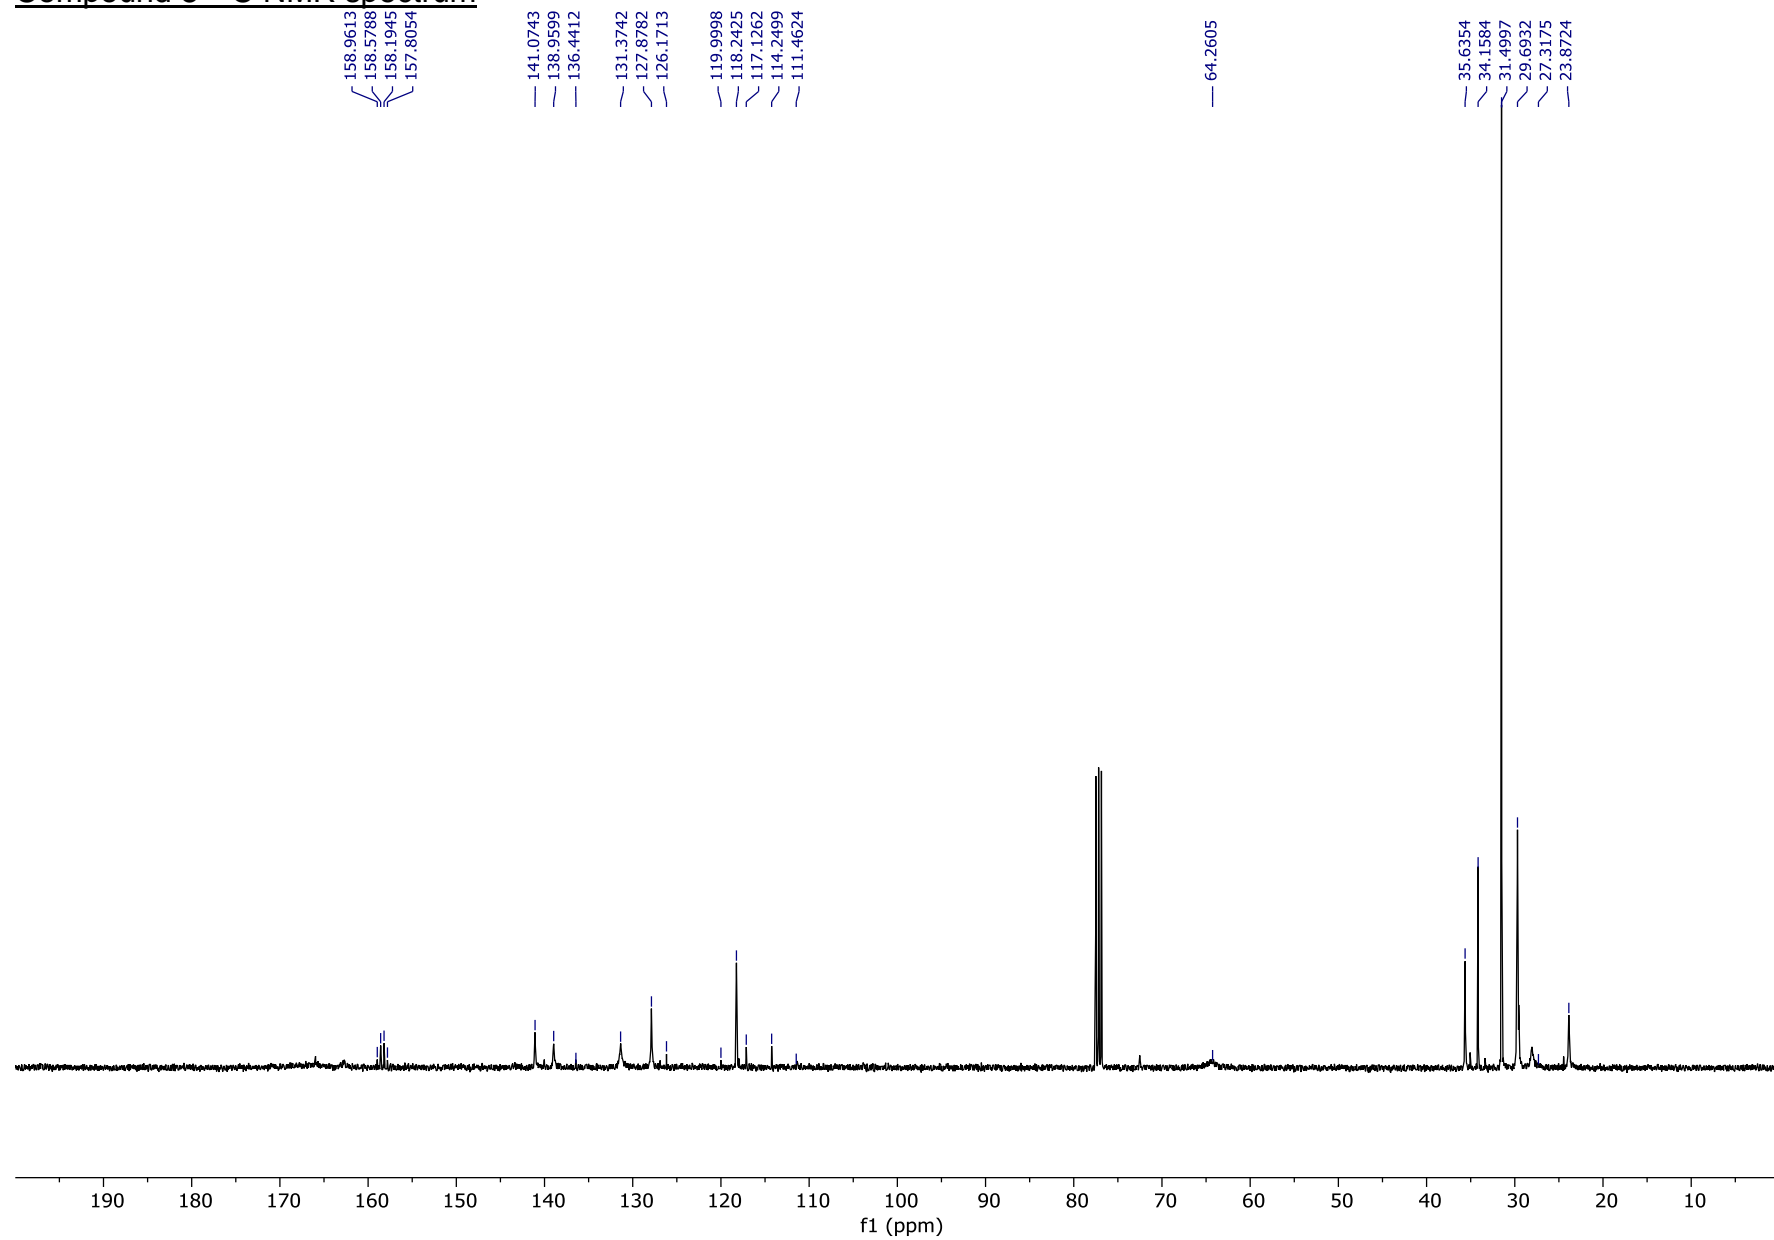

S37

Compound 8  $^{19}\text{F}$  NMR spectrum

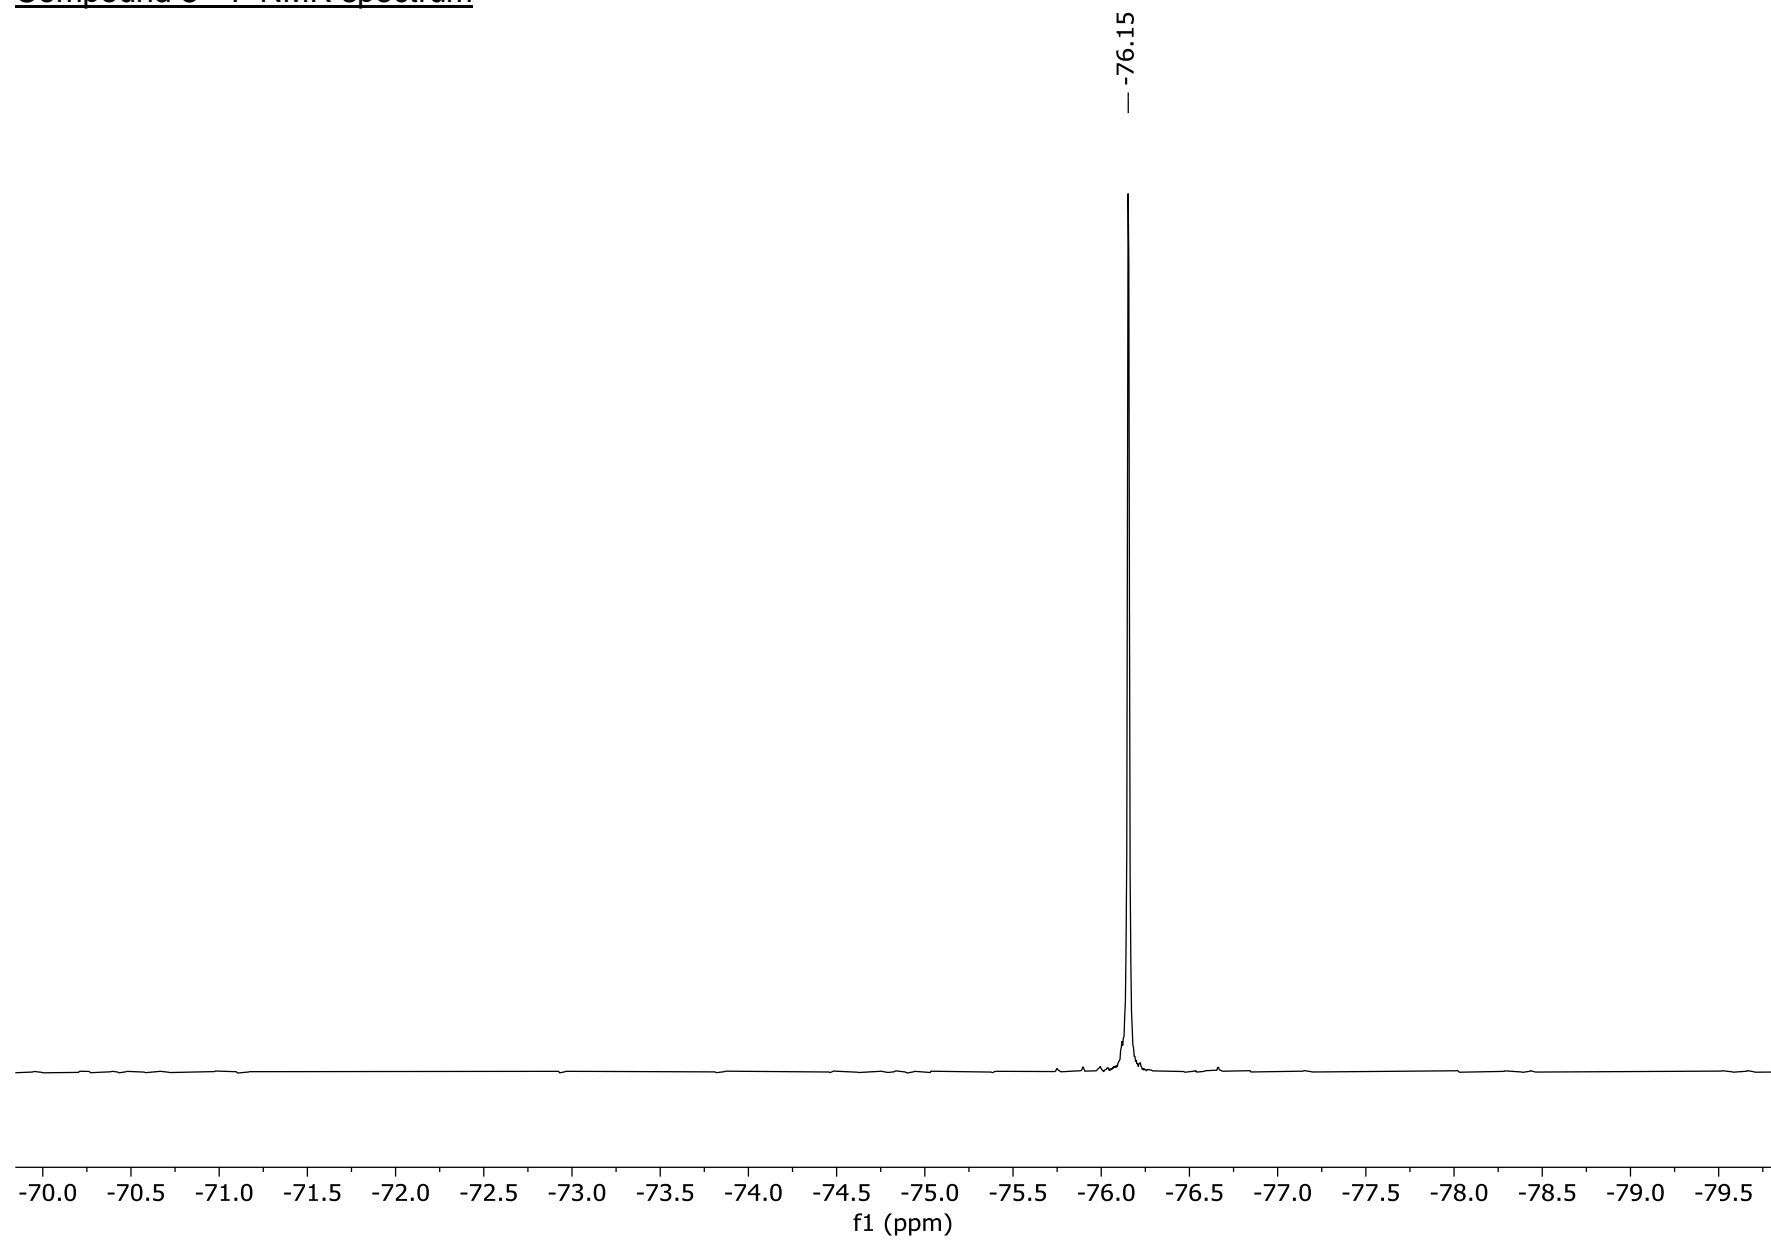

S38

Compound 9 <sup>1</sup>H NMR spectrum

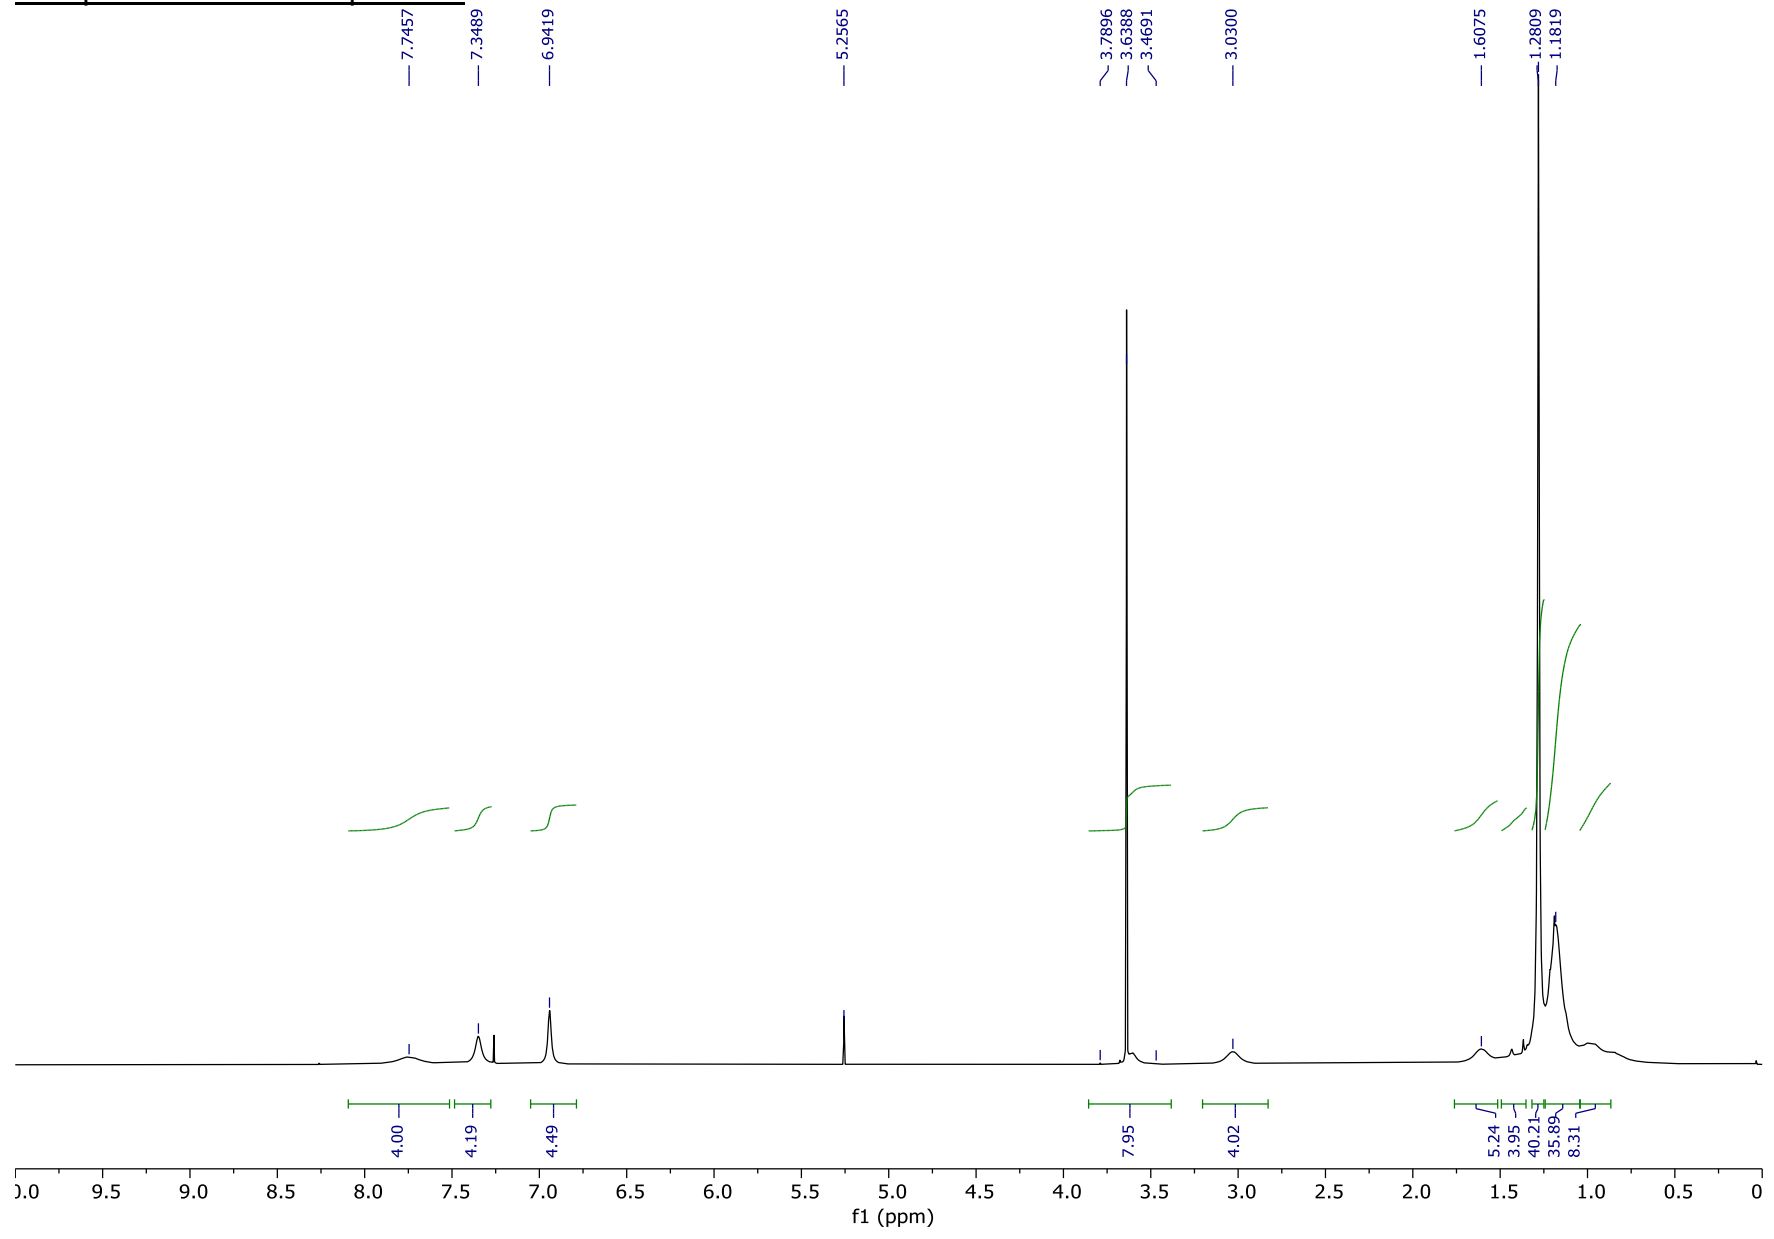

Compound 9  $^{13}\text{C}$  NMR spectrum

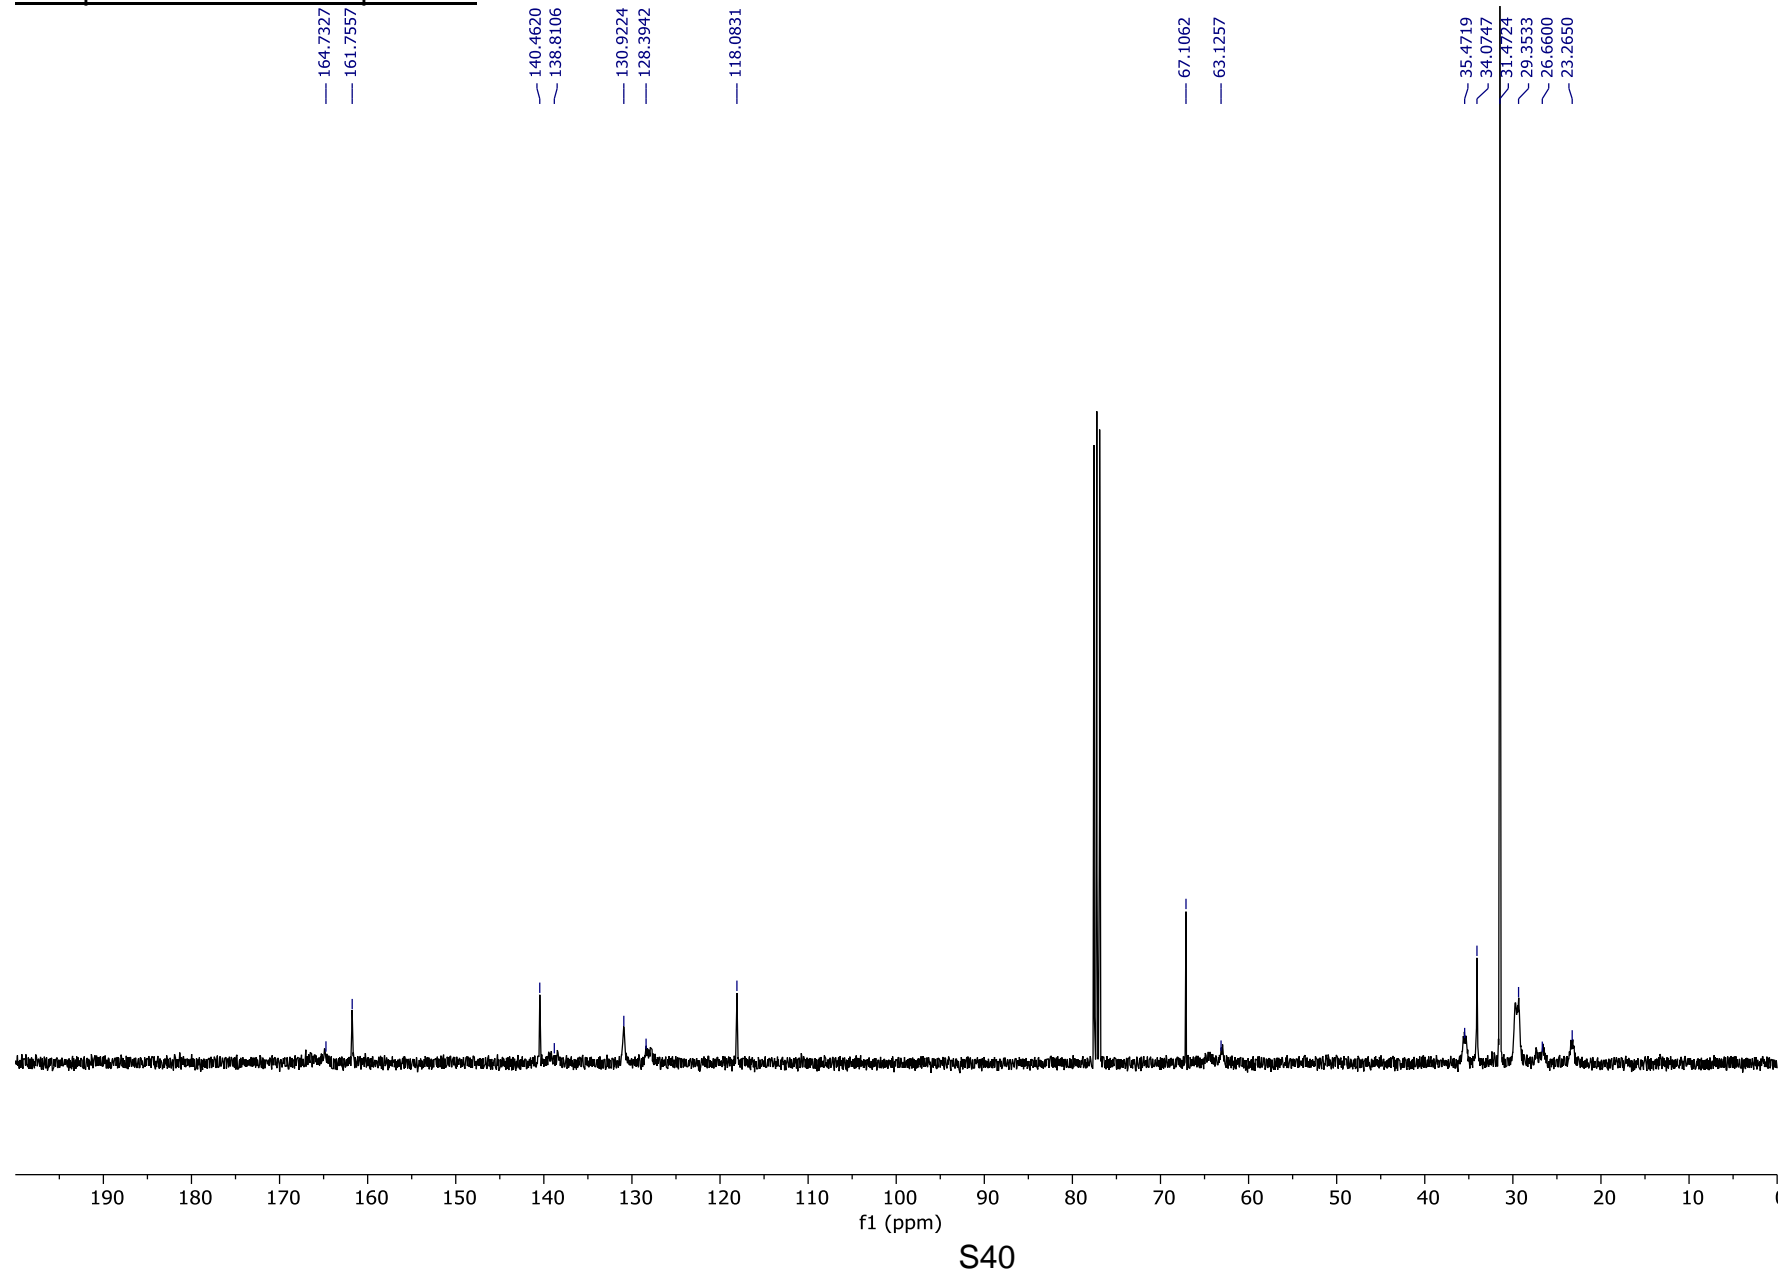



**11 From Al(<sup>t</sup>Bu-salen)Cl and dioxane <sup>1</sup>H NMR spectrum**

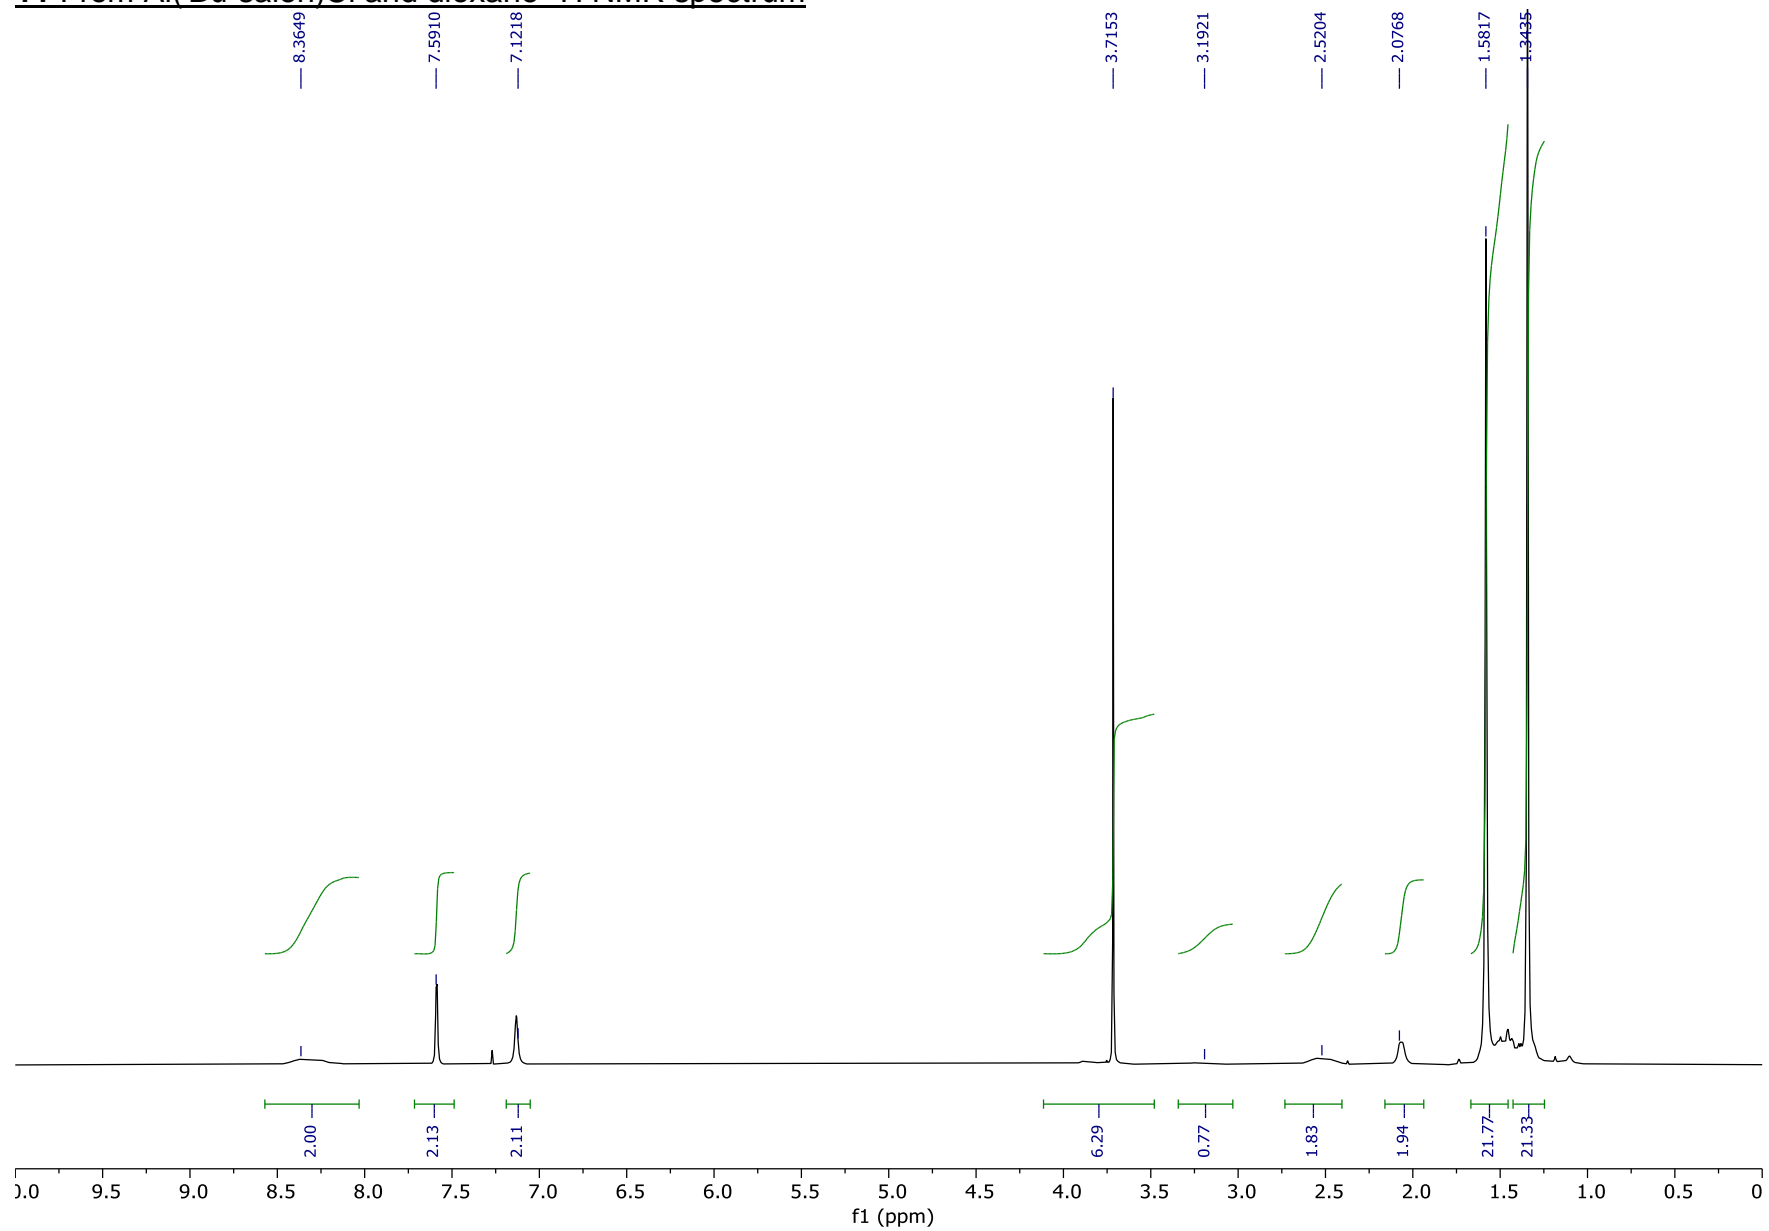

S41

**11 From Al(<sup>t</sup>Bu-salen)Cl and dioxane <sup>13</sup>C NMR spectrum**

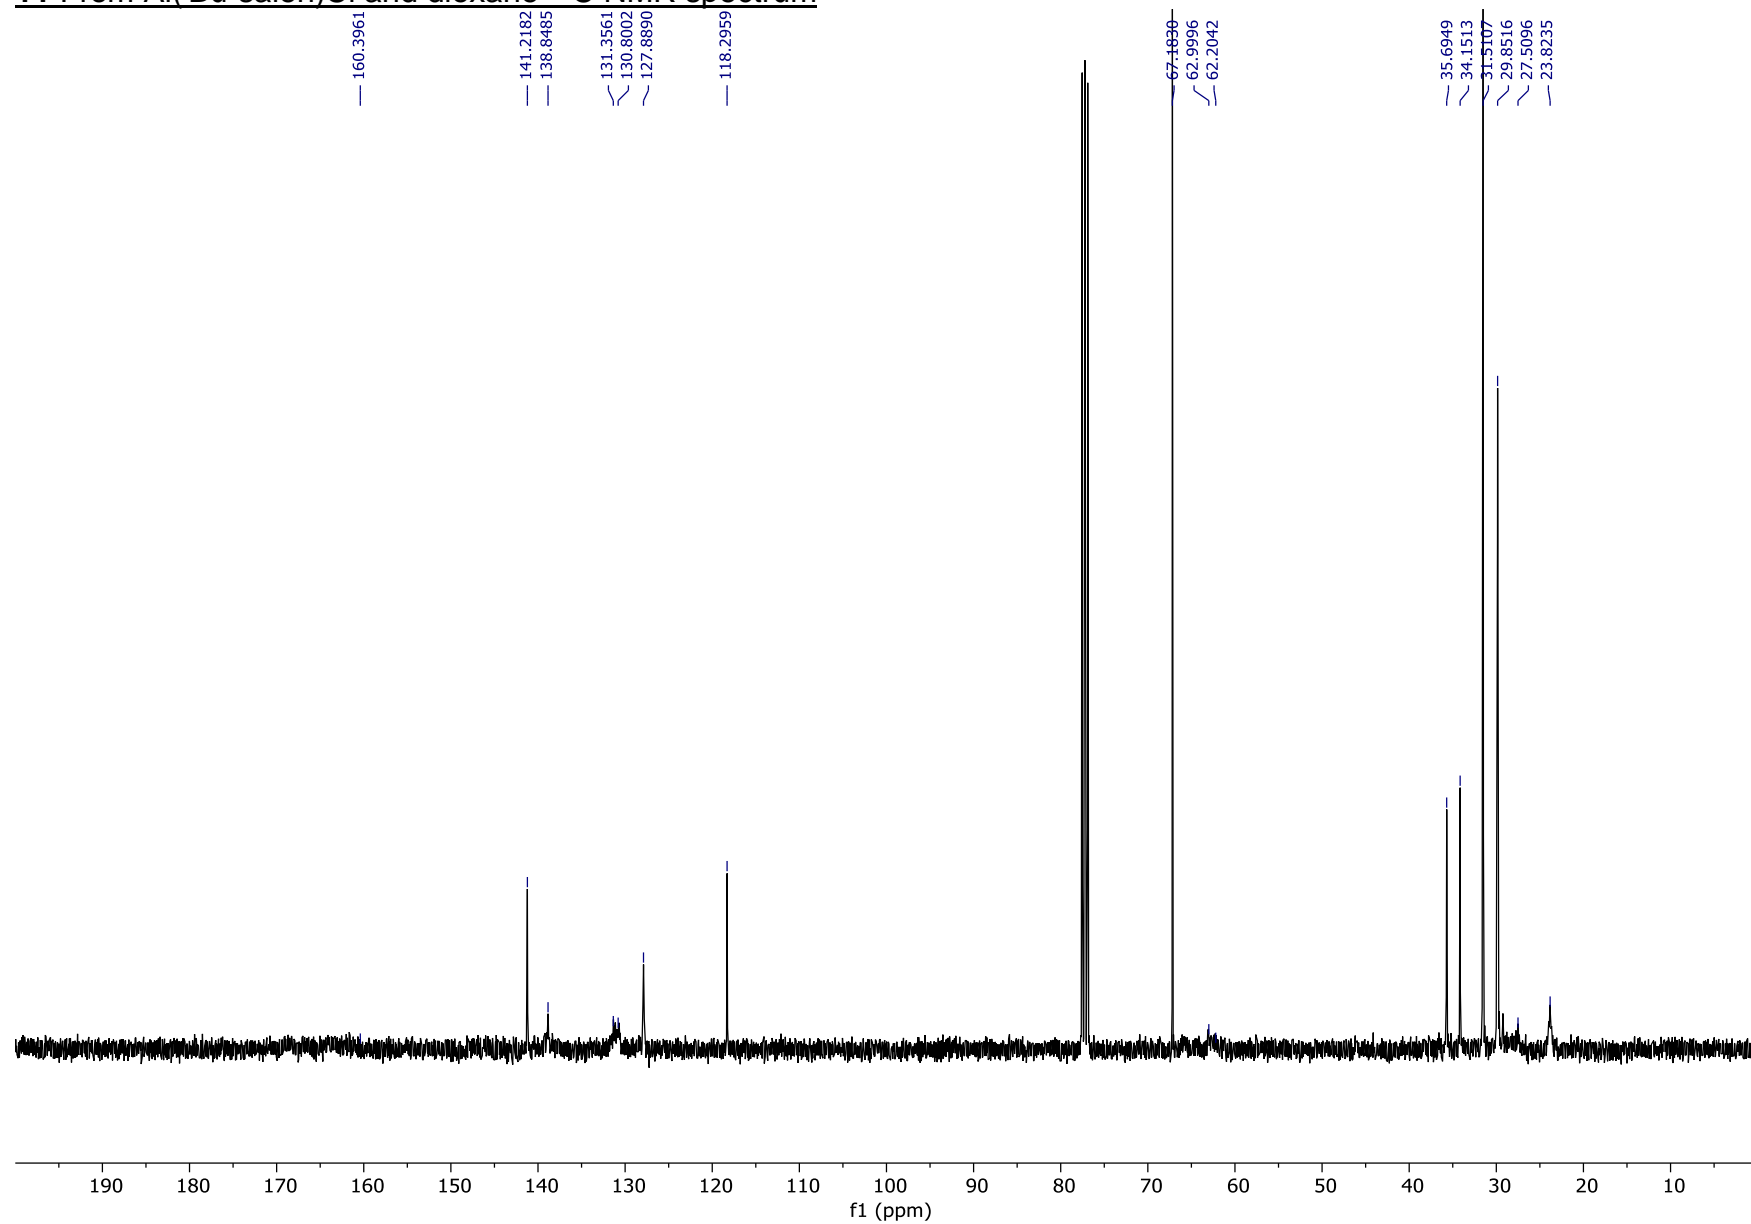

**10+11 From HCl addition to 1 <sup>1</sup>H NMR spectrum**

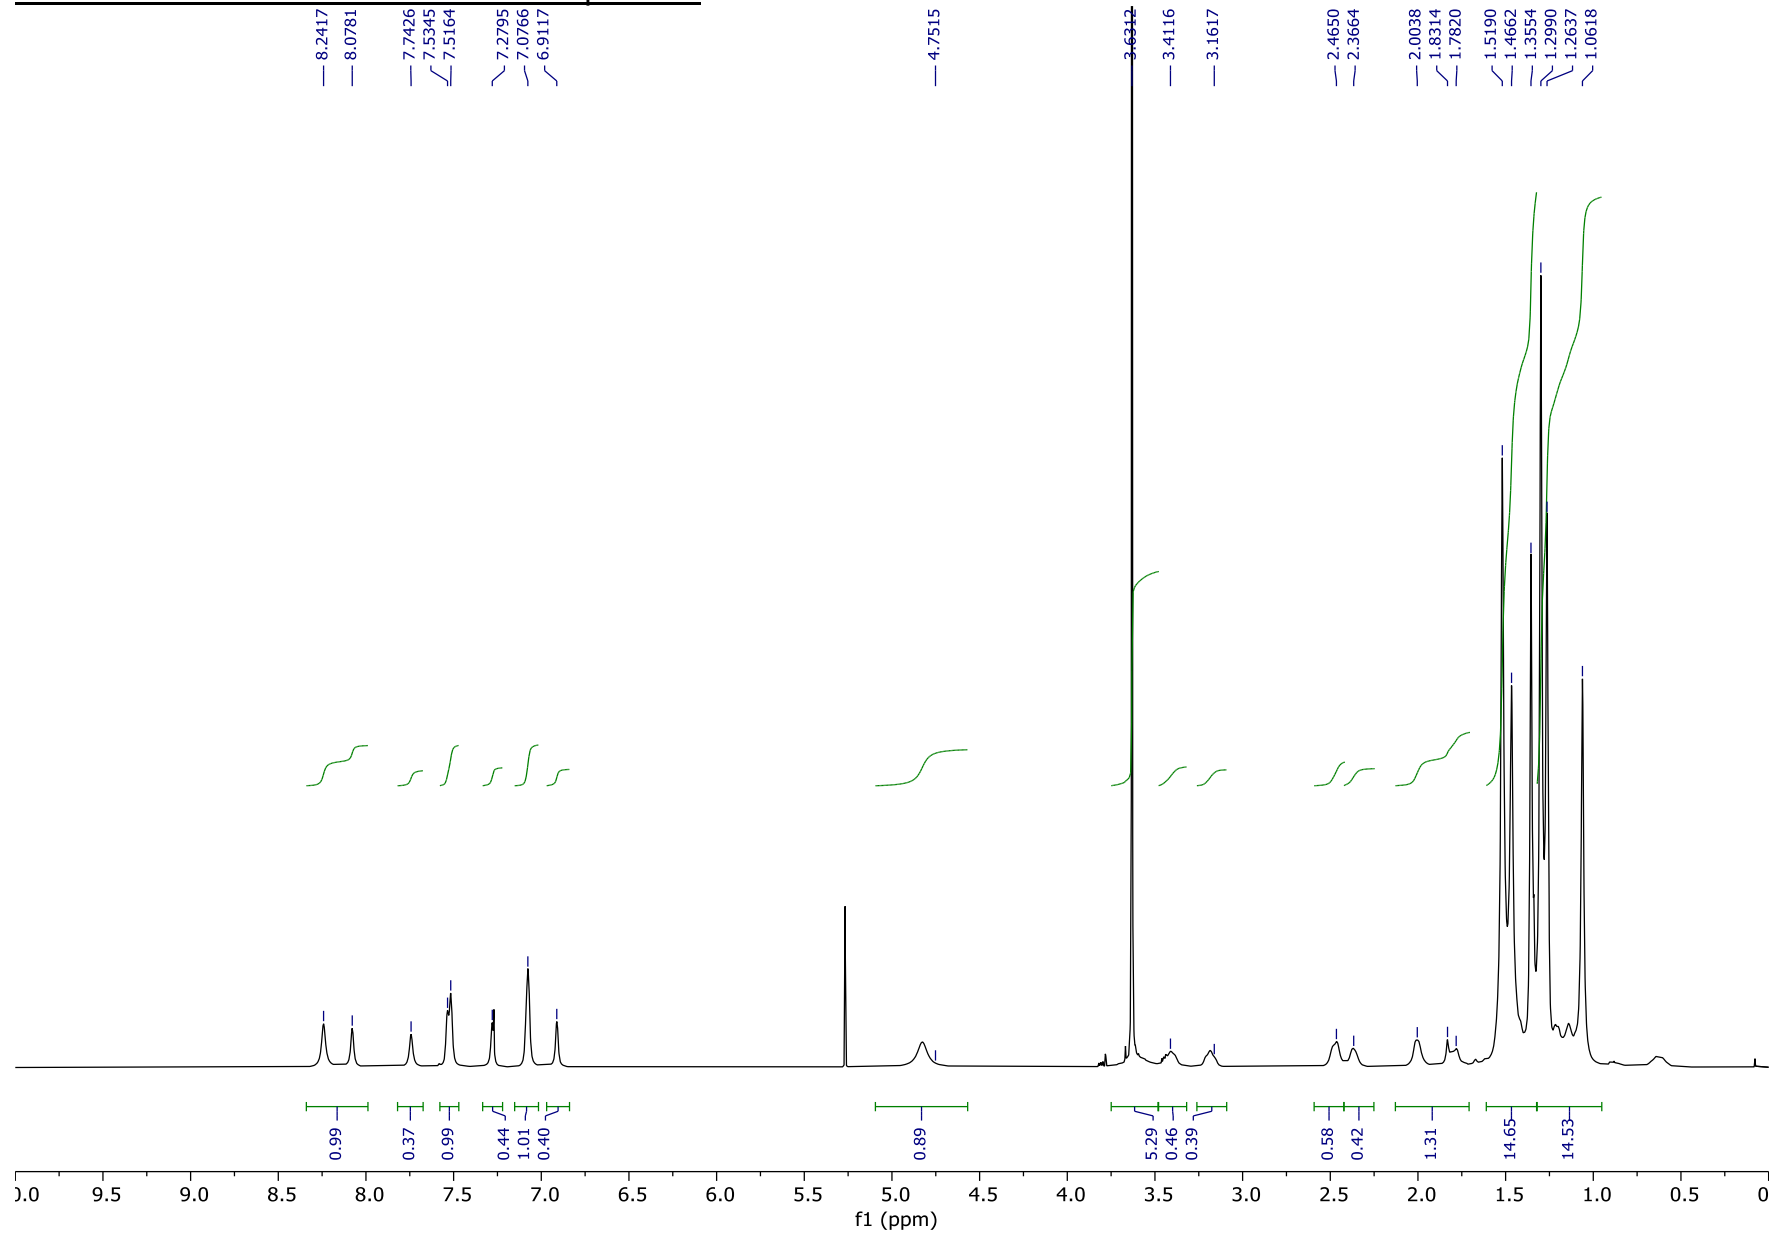

S43

**10+11** From Al(<sup>t</sup>Bu-salen)Cl and dioxane <sup>1</sup>H NMR spectrum

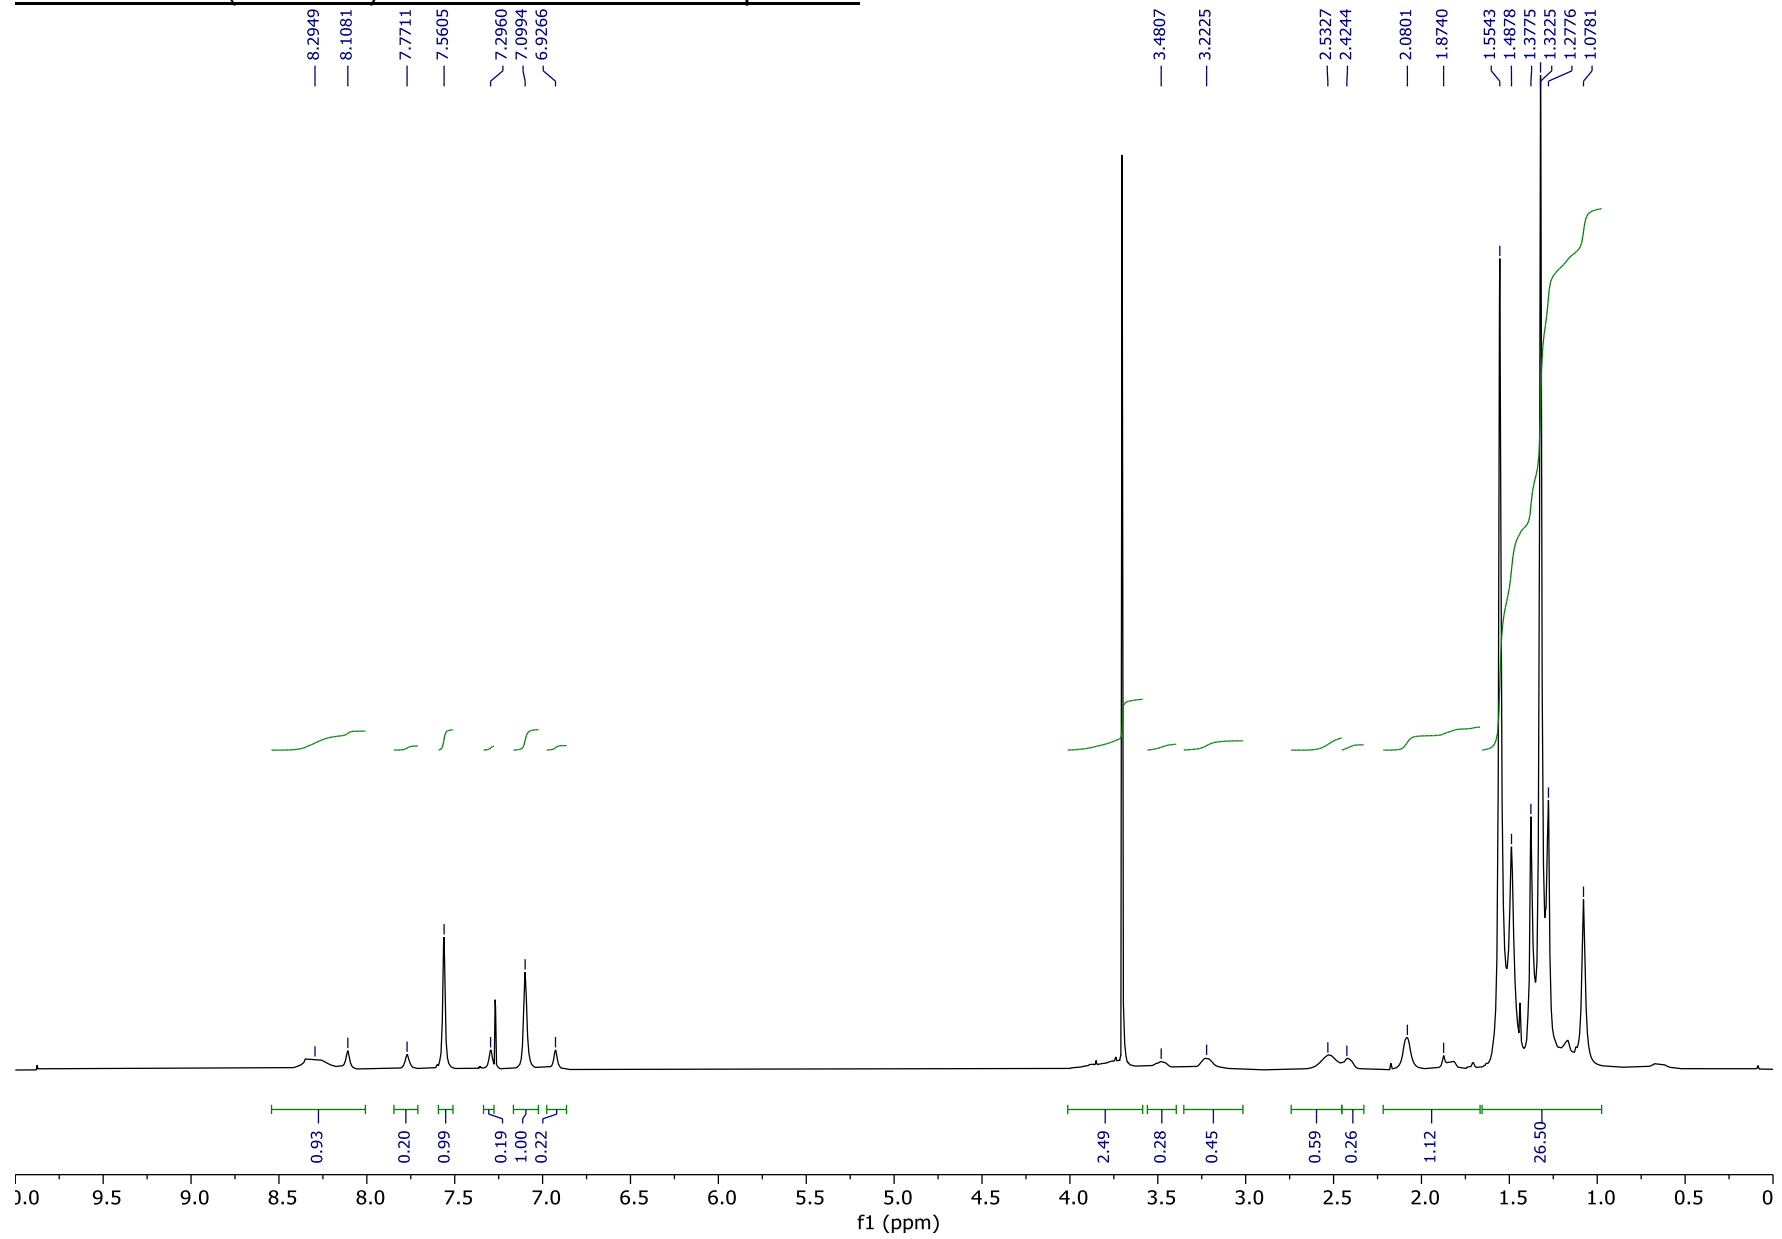

NOESY spectrum of **10+11** from Al(<sup>t</sup>Bu-salen)Cl and dioxane (on-diagonal peaks above 3 pm have been assigned to **10** or **11**)

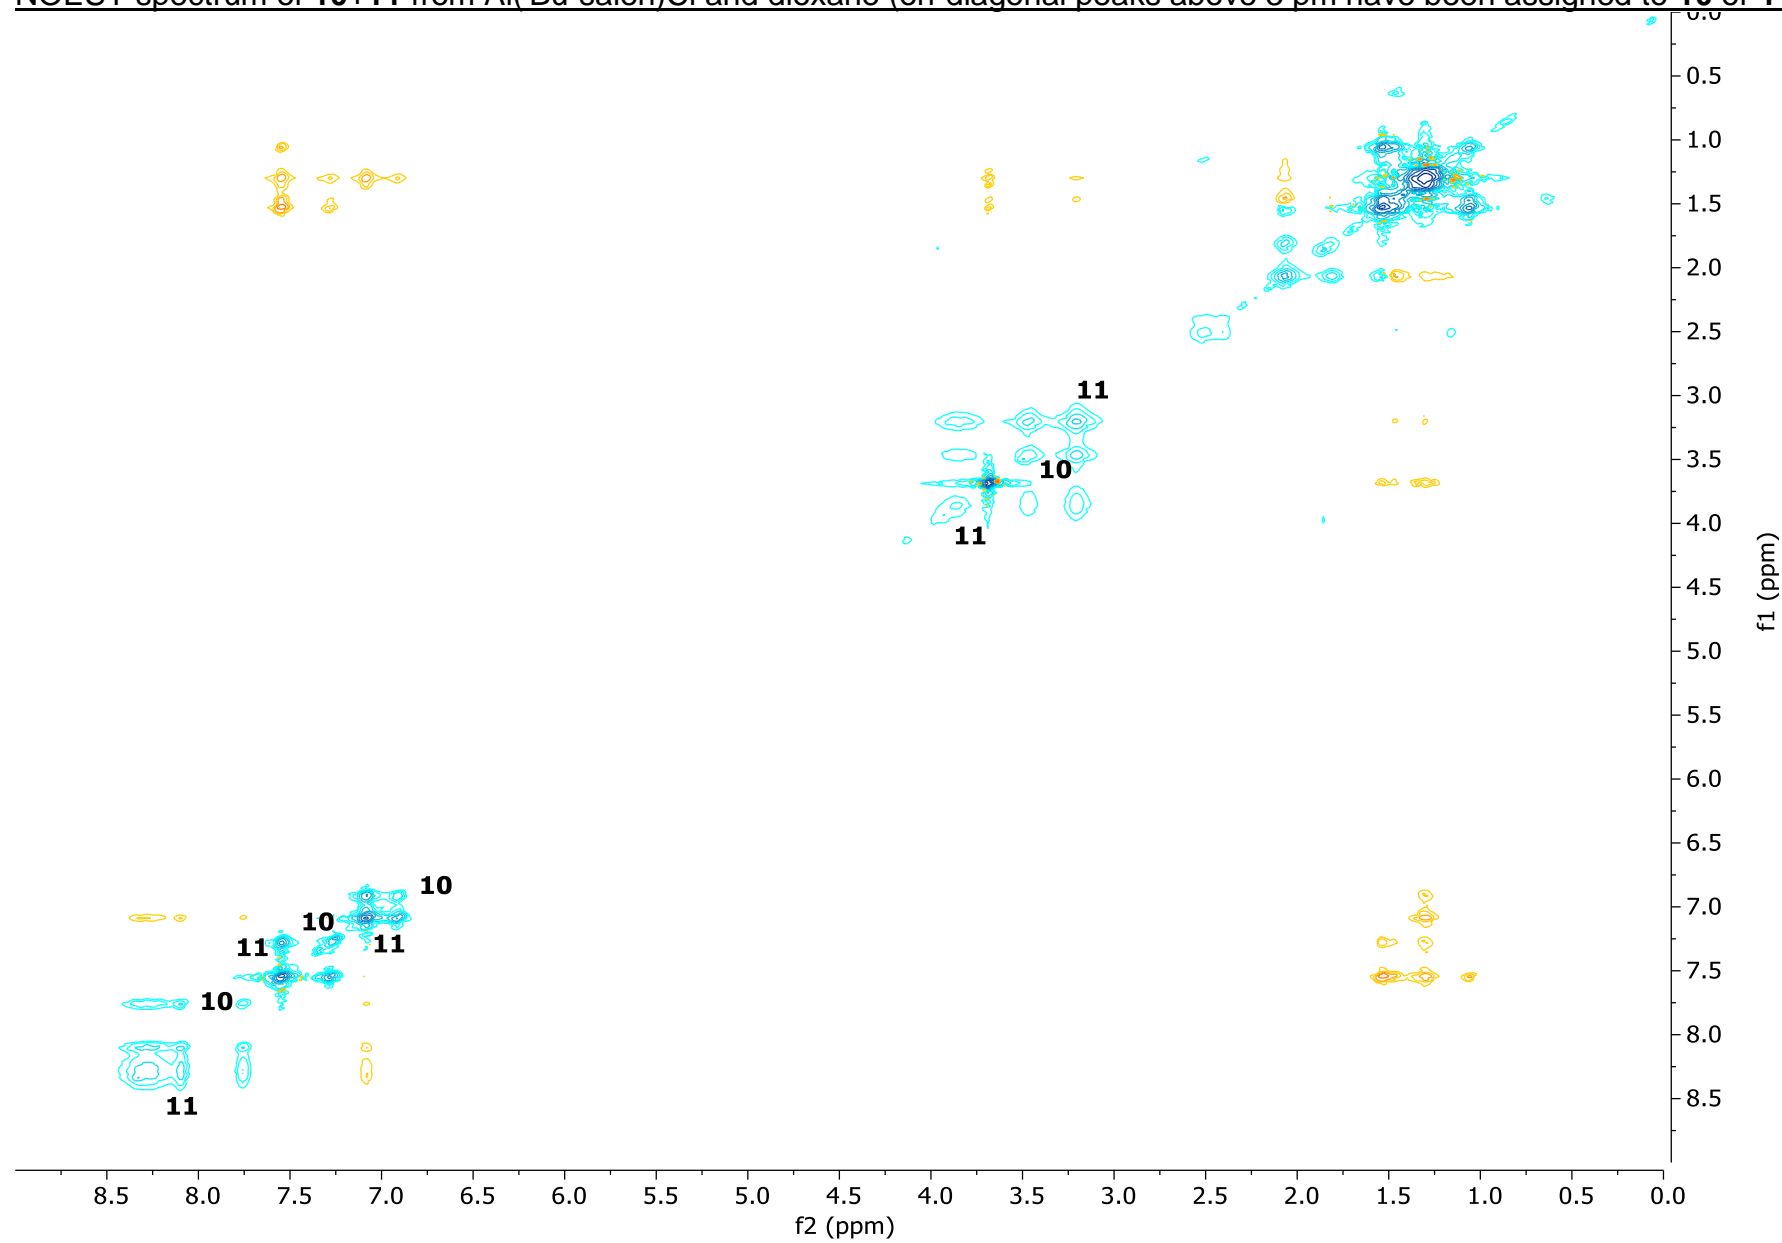

S45

VT NMR spectra (218-328 K) of **10+11** from Al(<sup>t</sup>Bu-salen)Cl and dioxane (6.5-9.5 ppm region)

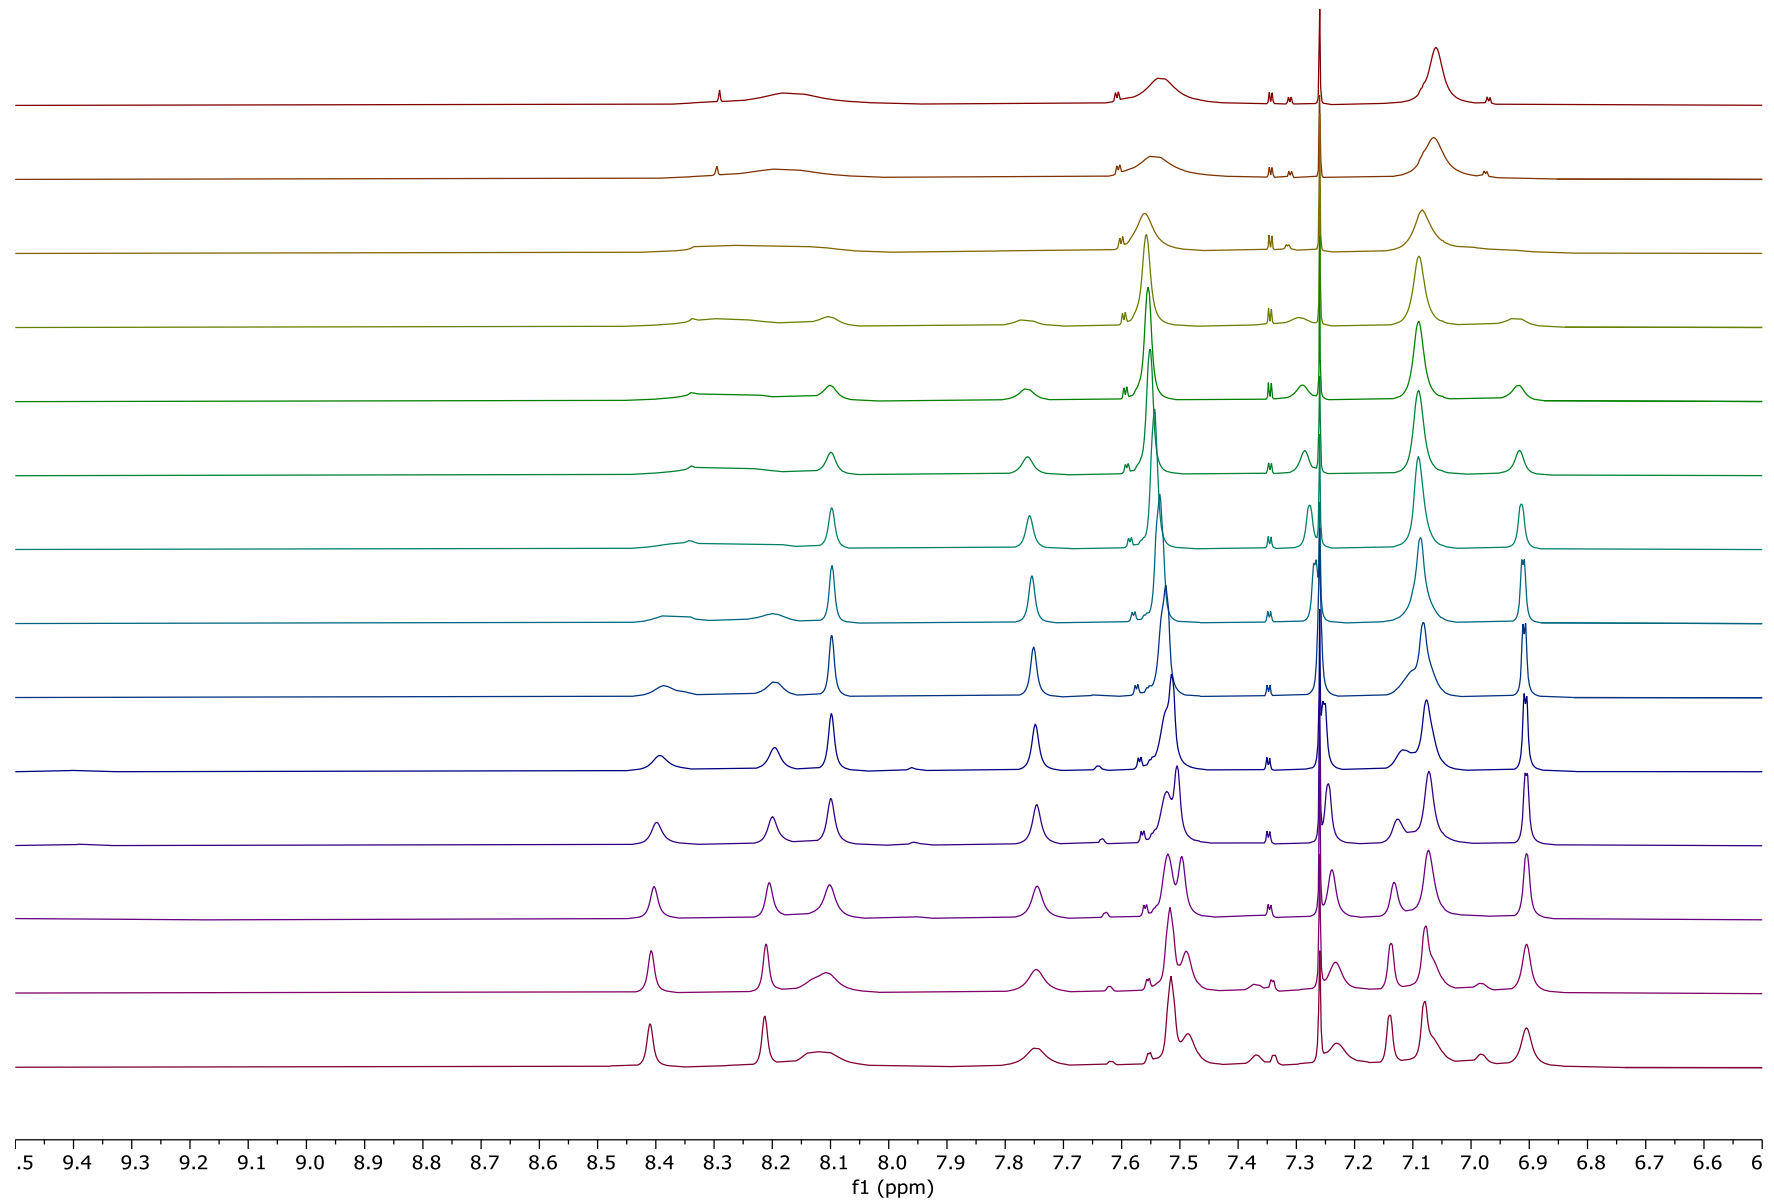

S46

VT NMR spectra (218-328 K) of **10+11** from Al(<sup>t</sup>Bu-salen)Cl and dioxane (6.5-3.0 ppm region)

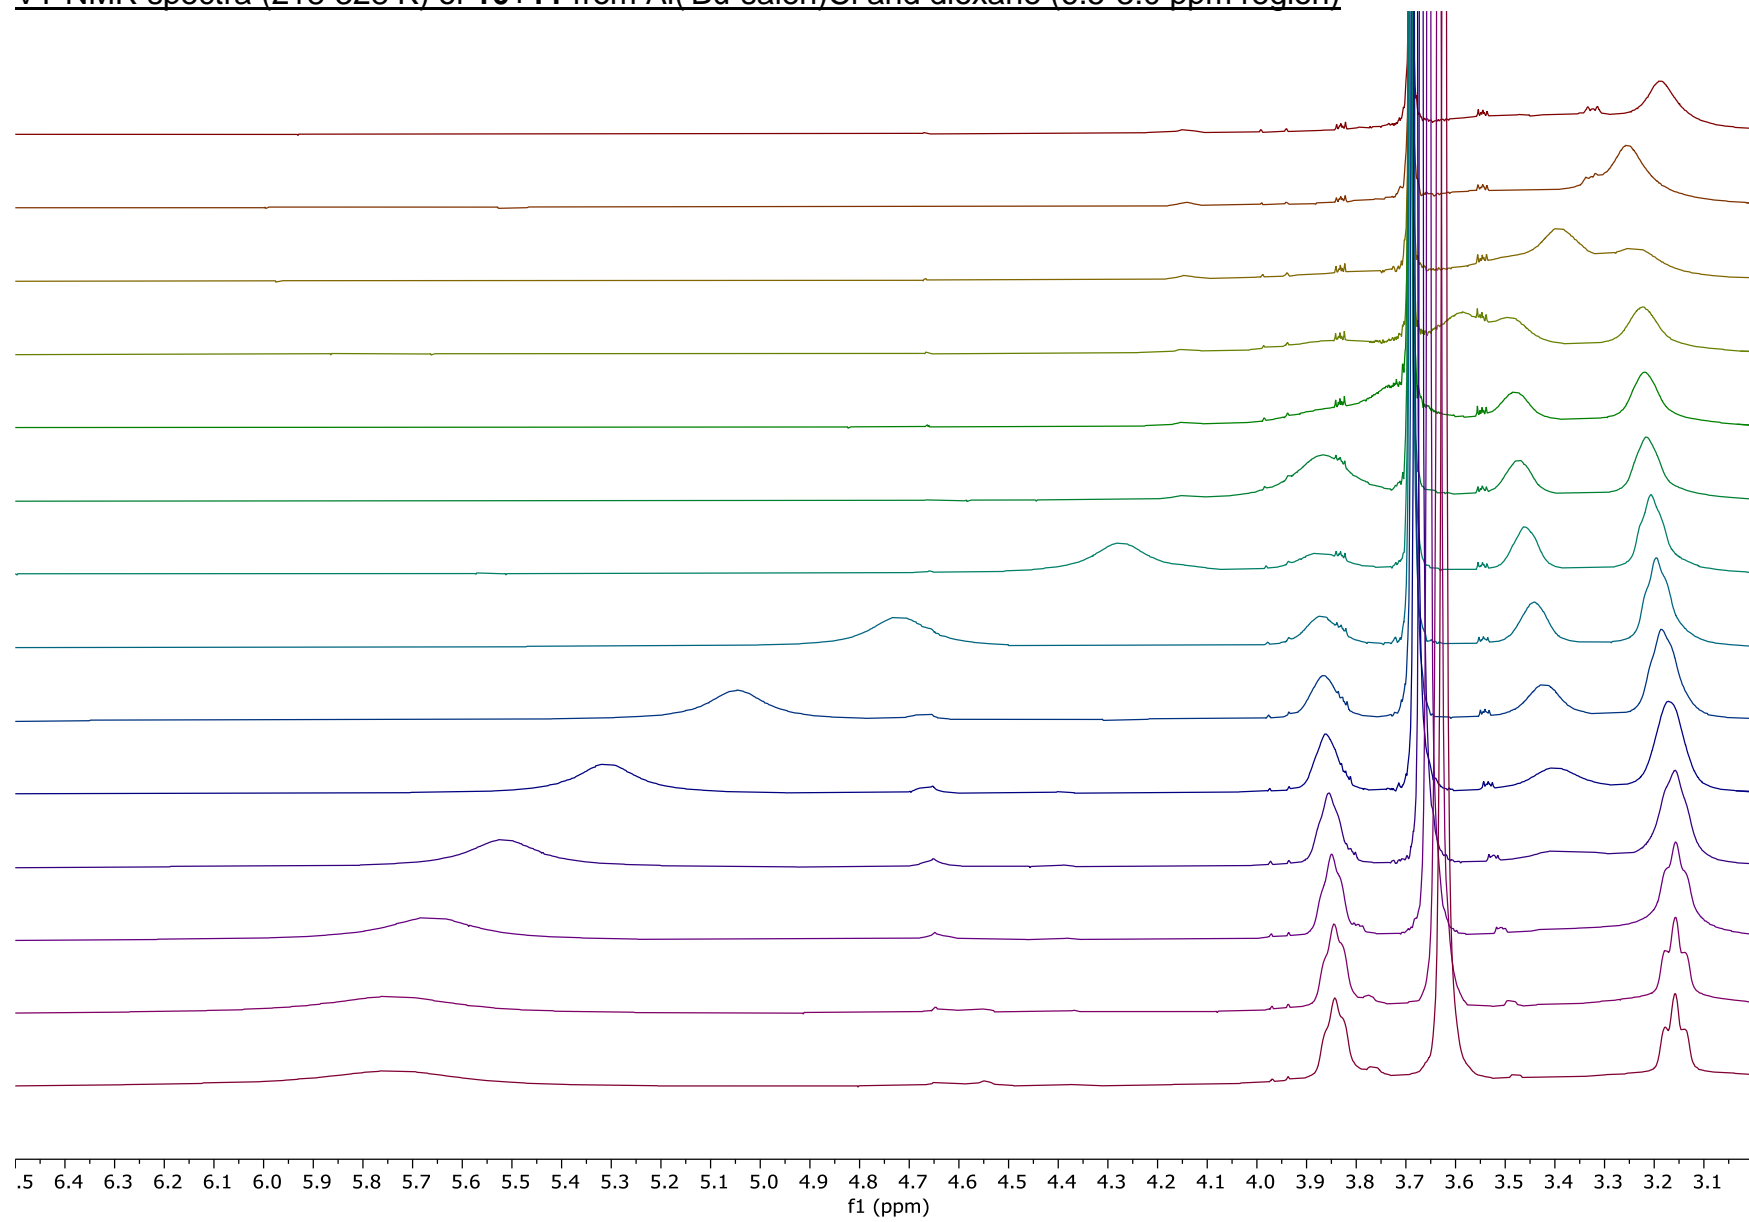

VT NMR spectra (218-328 K) of 10+11 from Al(<sup>t</sup>Bu-salen)Cl and dioxane (3.0-0 ppm region emphasising changes in non-tert-butyl peaks)

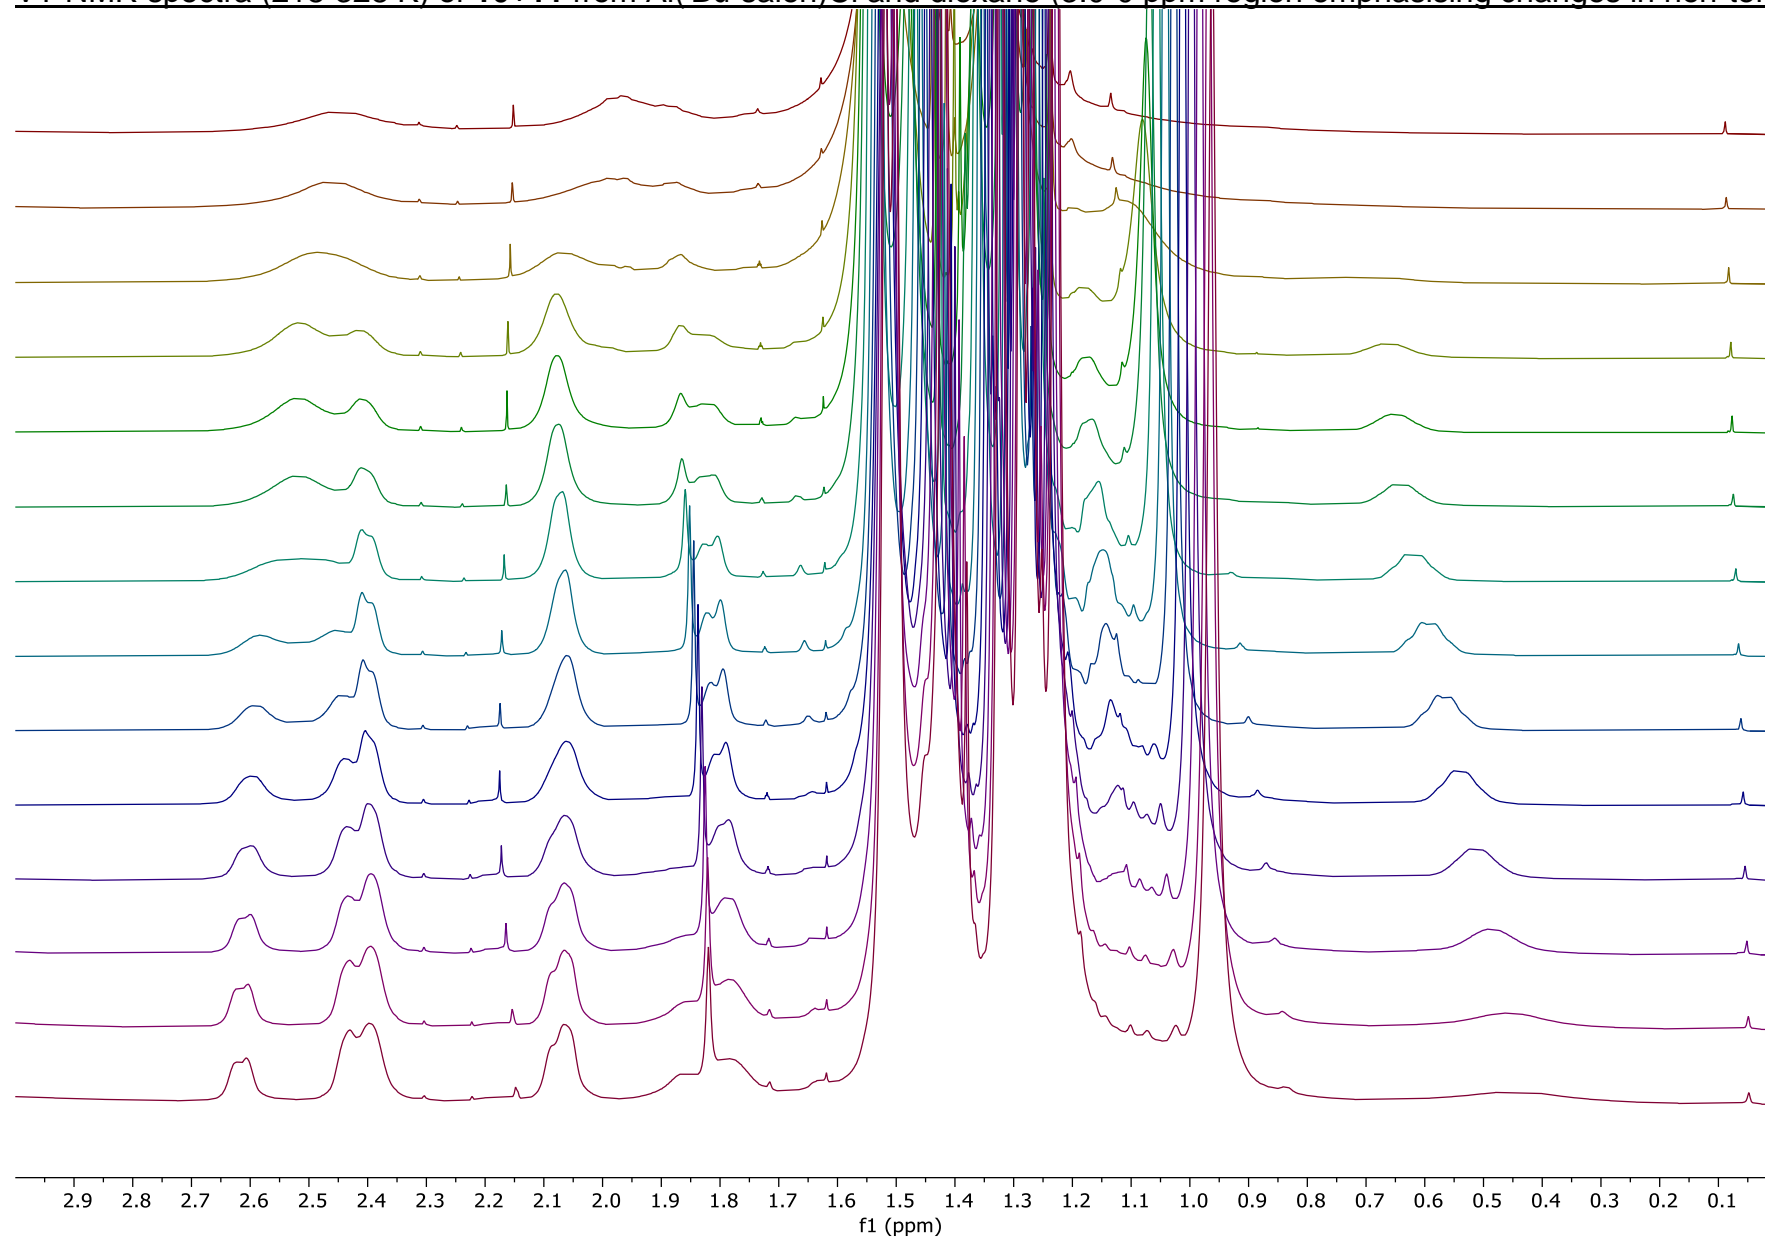

S48



VT NMR spectra (218-328 K) of **10+11** from Al(<sup>t</sup>Bu-salen)Cl and dioxane (3.0-0 ppm region emphasising changes in tert-butyl peaks)

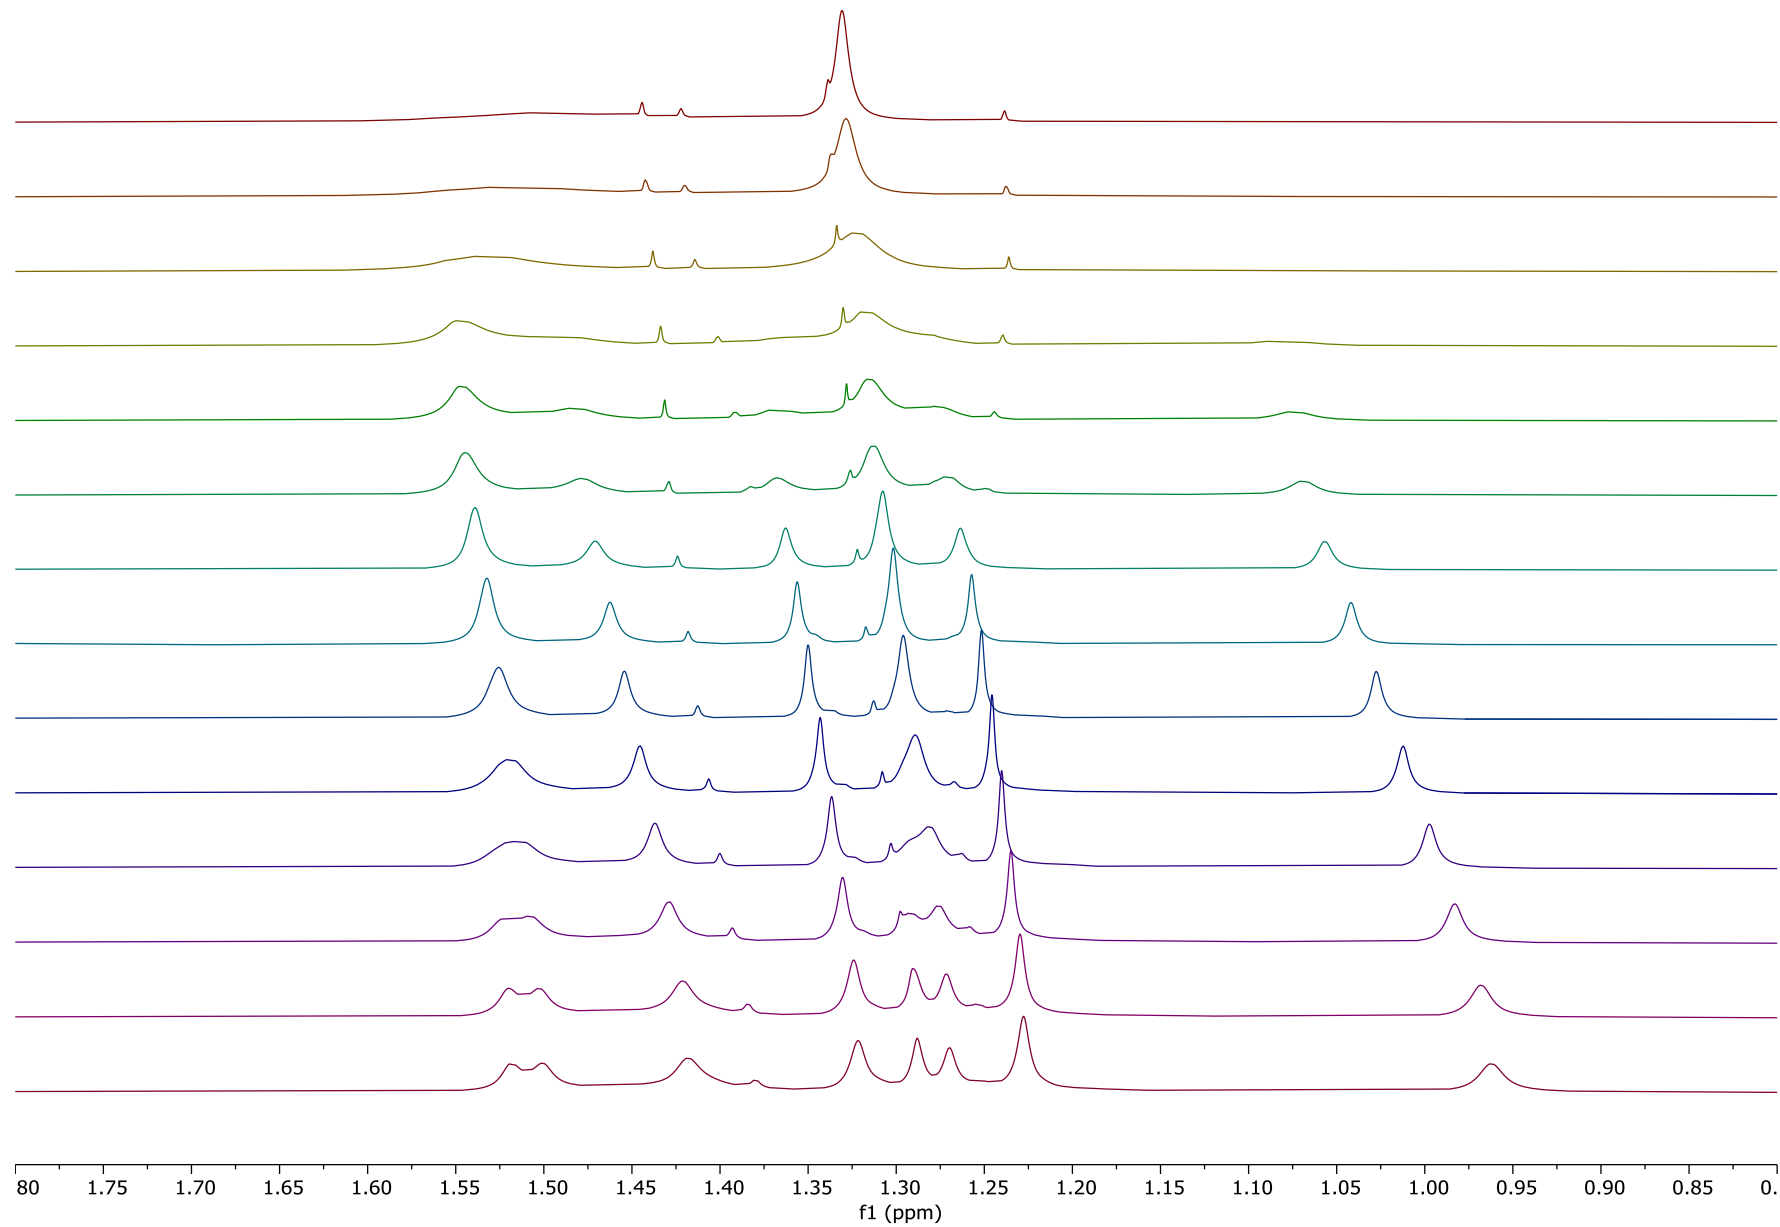

S49

Al(<sup>t</sup>Bu-salen)Cl <sup>1</sup>H NMR spectrum

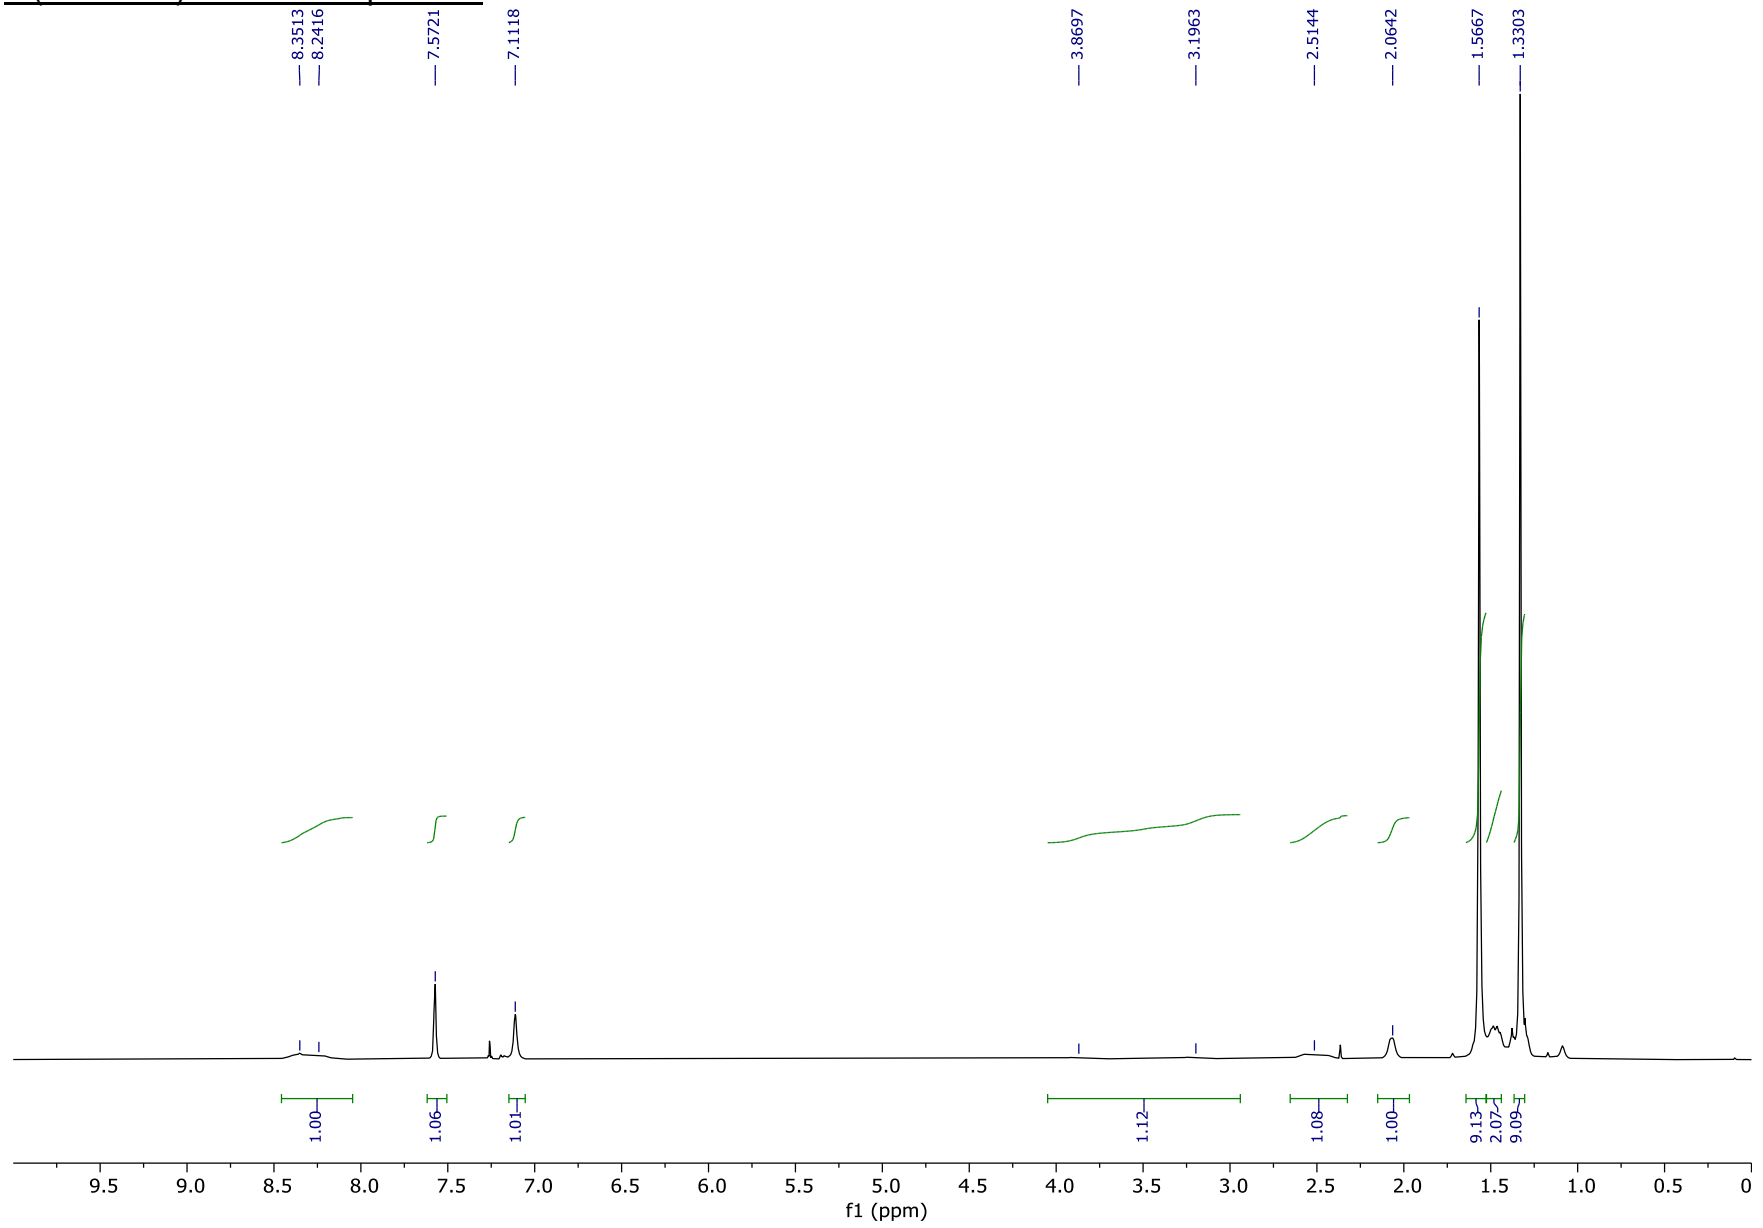

S50

[Al(<sup>t</sup>Bu-salen)(dioxane)<sub>2</sub>]<sup>+</sup>Cl<sup>-</sup> <sup>1</sup>H NMR spectrum

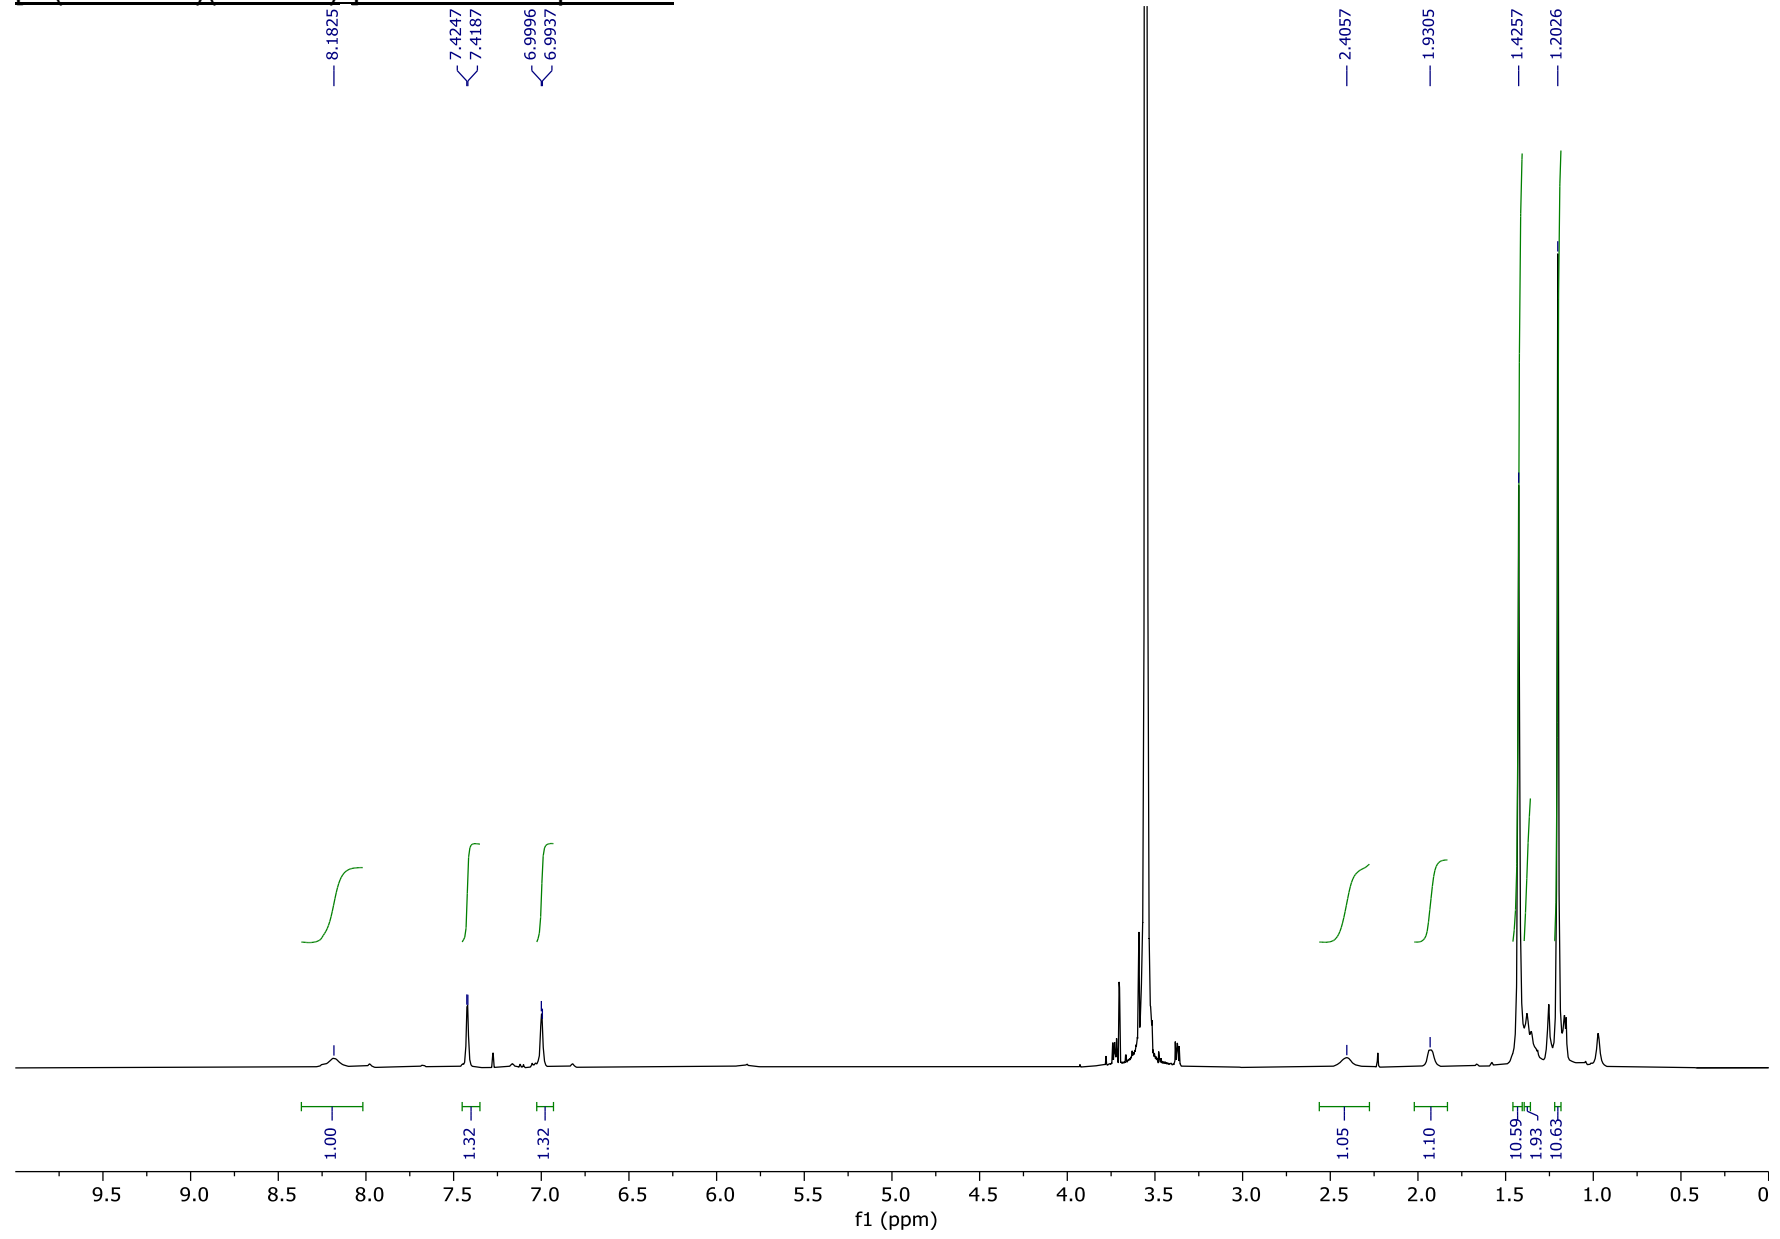

S51

$^1\text{H}$  NMR spectra of the addition of 1,2-epoxyhexane to complex **1** in  $\text{CDCl}_3$  (full spectra)

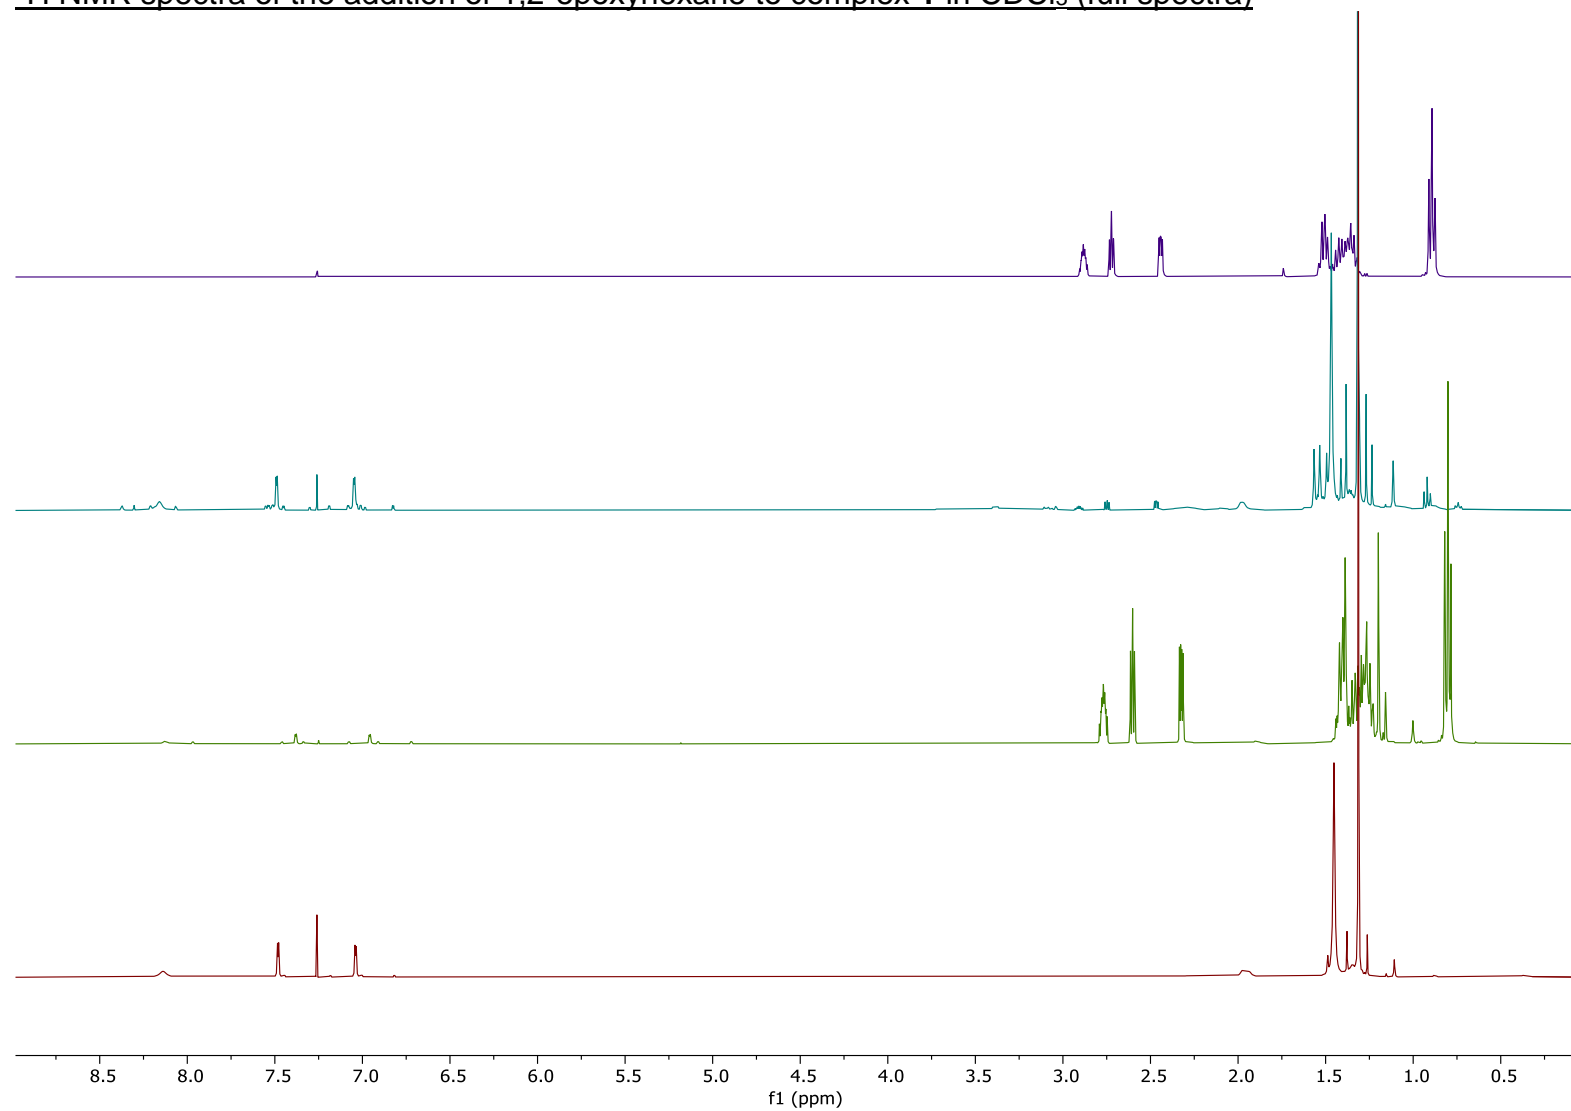

From bottom to top: complex **1**; complex **1** and excess 1,2-epoxyhexane; complex **1** after evaporation of excess 1,2-epoxyhexane; and 1,2-epoxyhexane.

$^1\text{H}$  NMR spectra of the addition of 1,2-epoxyhexane to complex **1** in  $\text{CDCl}_3$  (7.7–6.7 ppm)

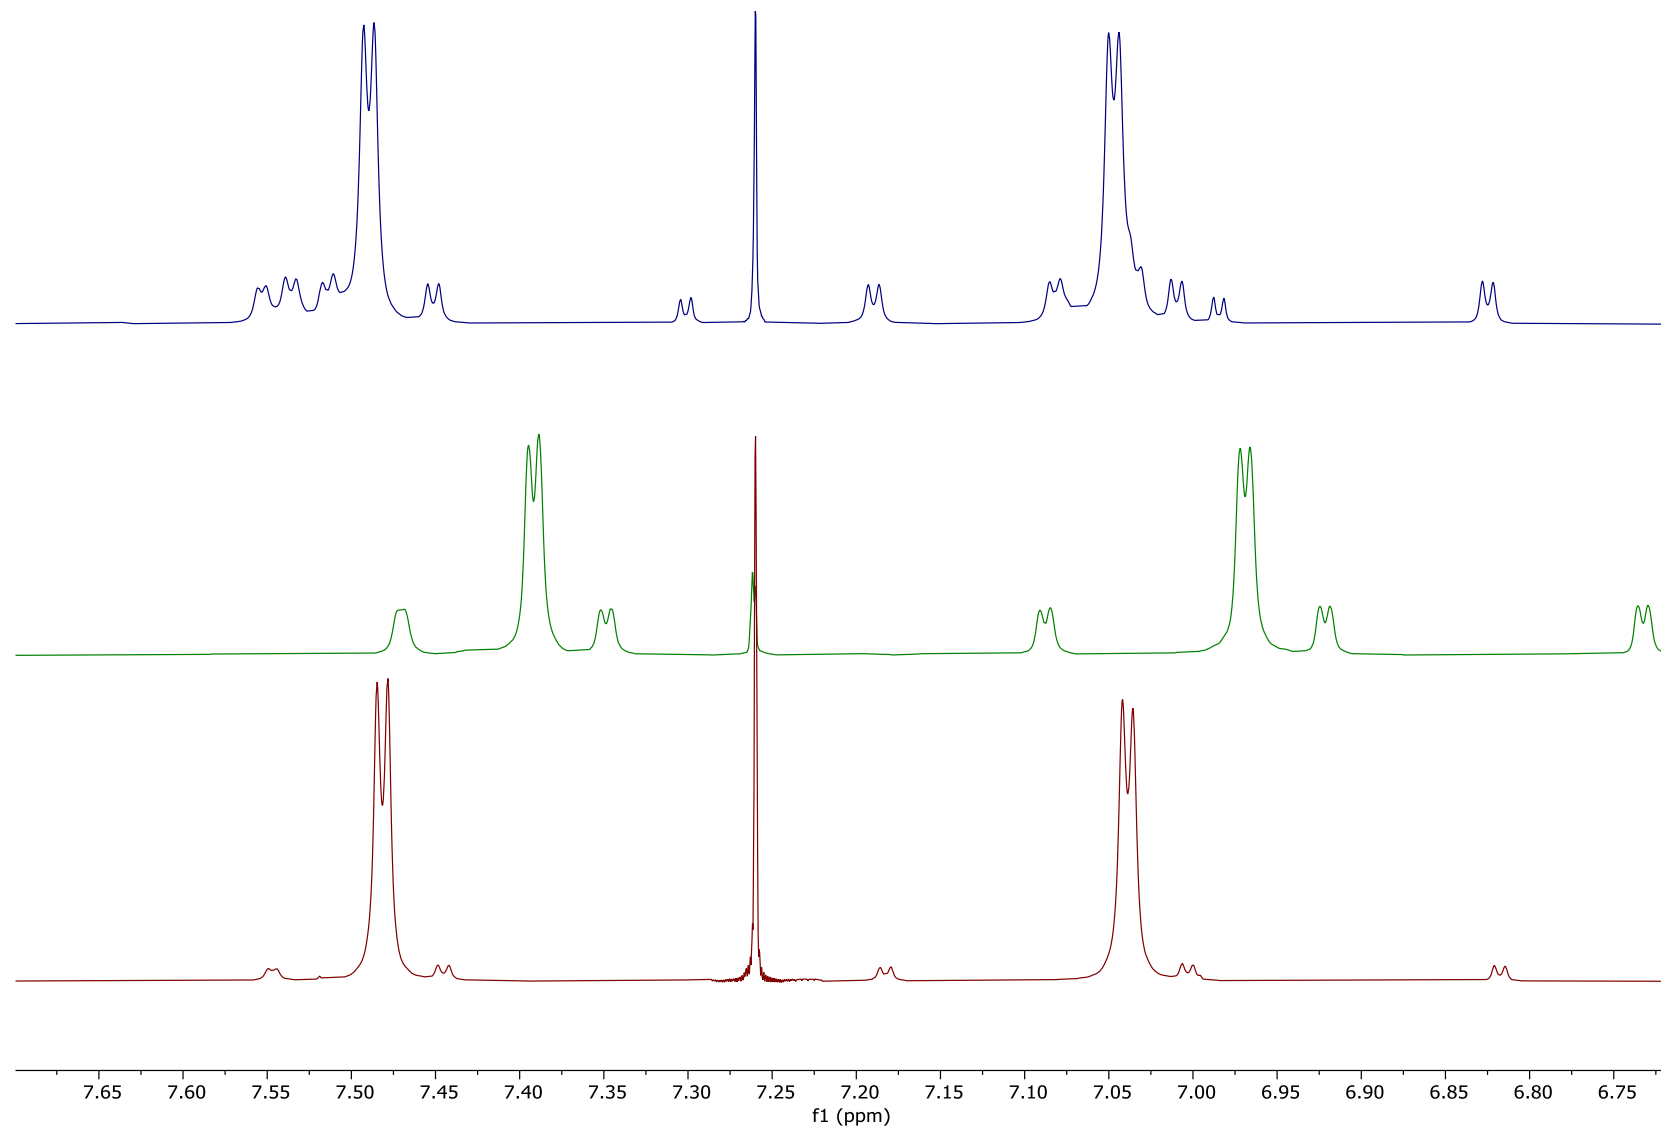

From bottom to top: complex **1**; complex **1** and excess 1,2-epoxyhexane; complex **1** after evaporation of excess 1,2-epoxyhexane.

$^1\text{H}$  NMR spectra of the addition of 1,2-epoxyhexane to complex **1** in  $\text{CDCl}_3$  (3.5–2.0 ppm)

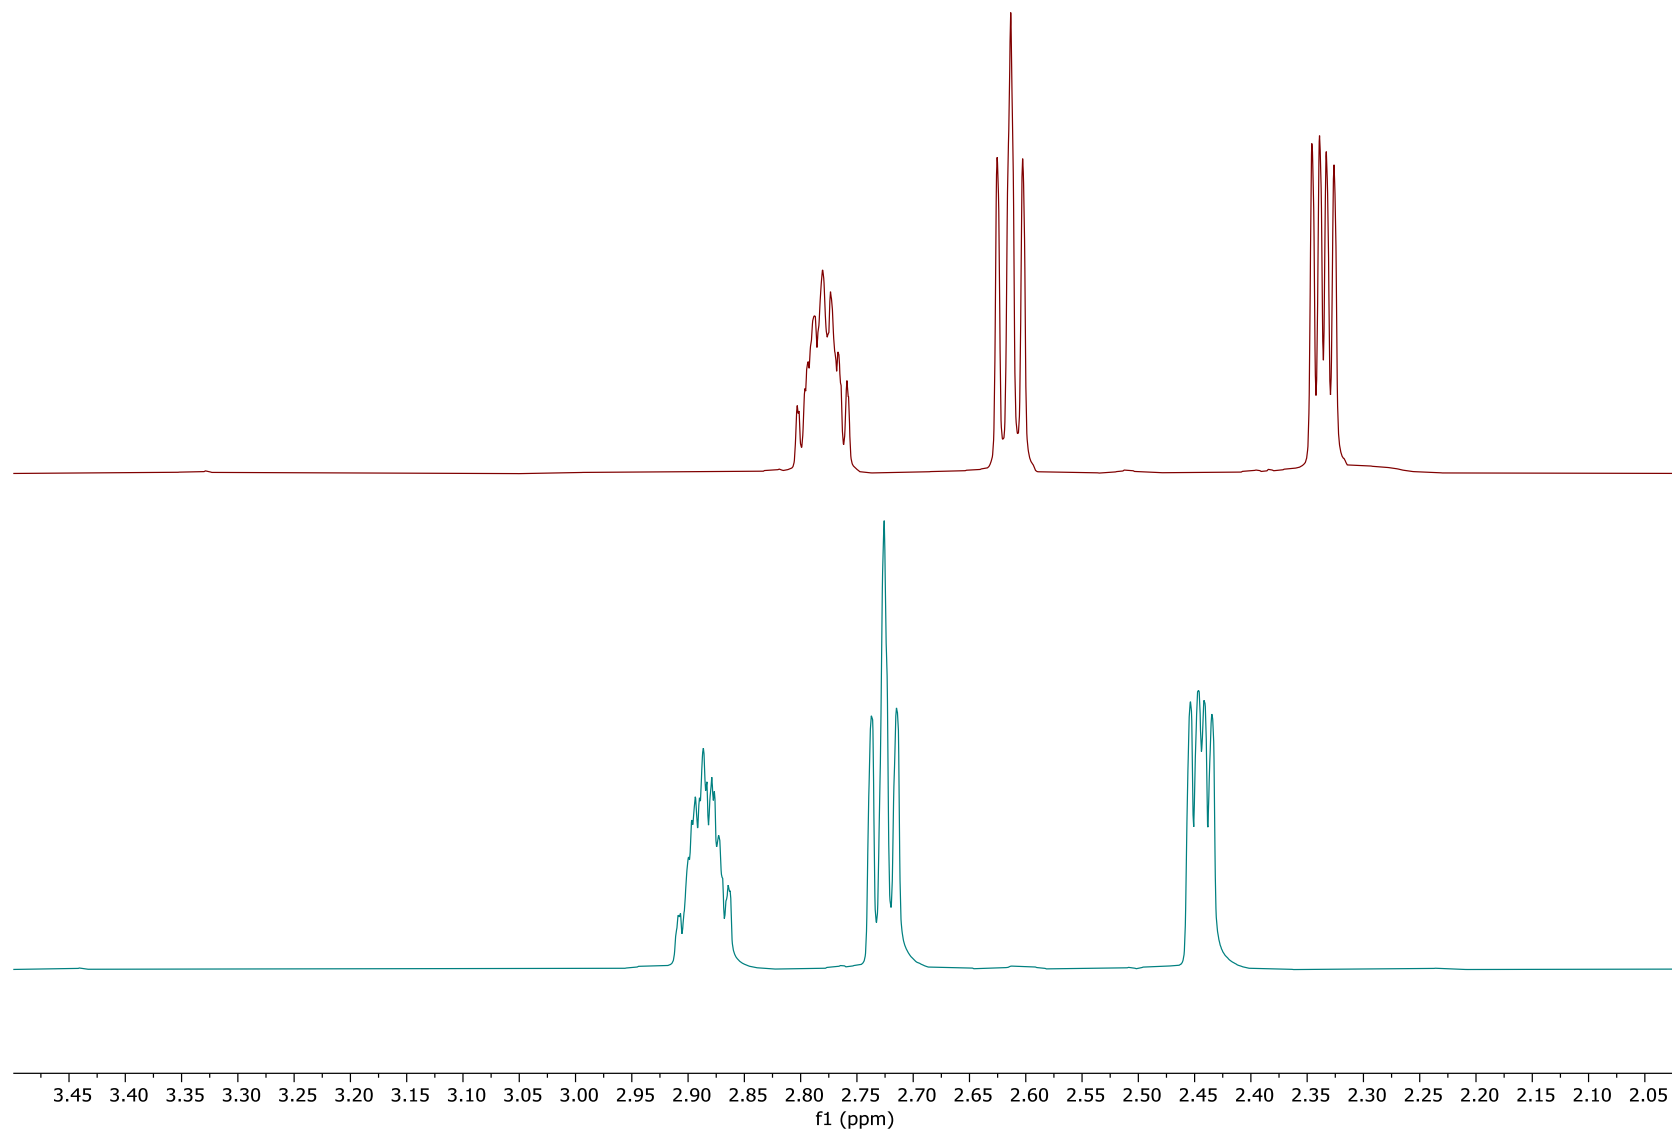

Bottom, 1,2-epoxyhexane; top, complex **1** and excess 1,2-epoxyhexane

$^1\text{H}$  NMR spectra of the addition of 1,2-epoxyhexane to  $(^t\text{Bu-salen})\text{AlCl}$  in  $\text{CDCl}_3$  (full spectra)

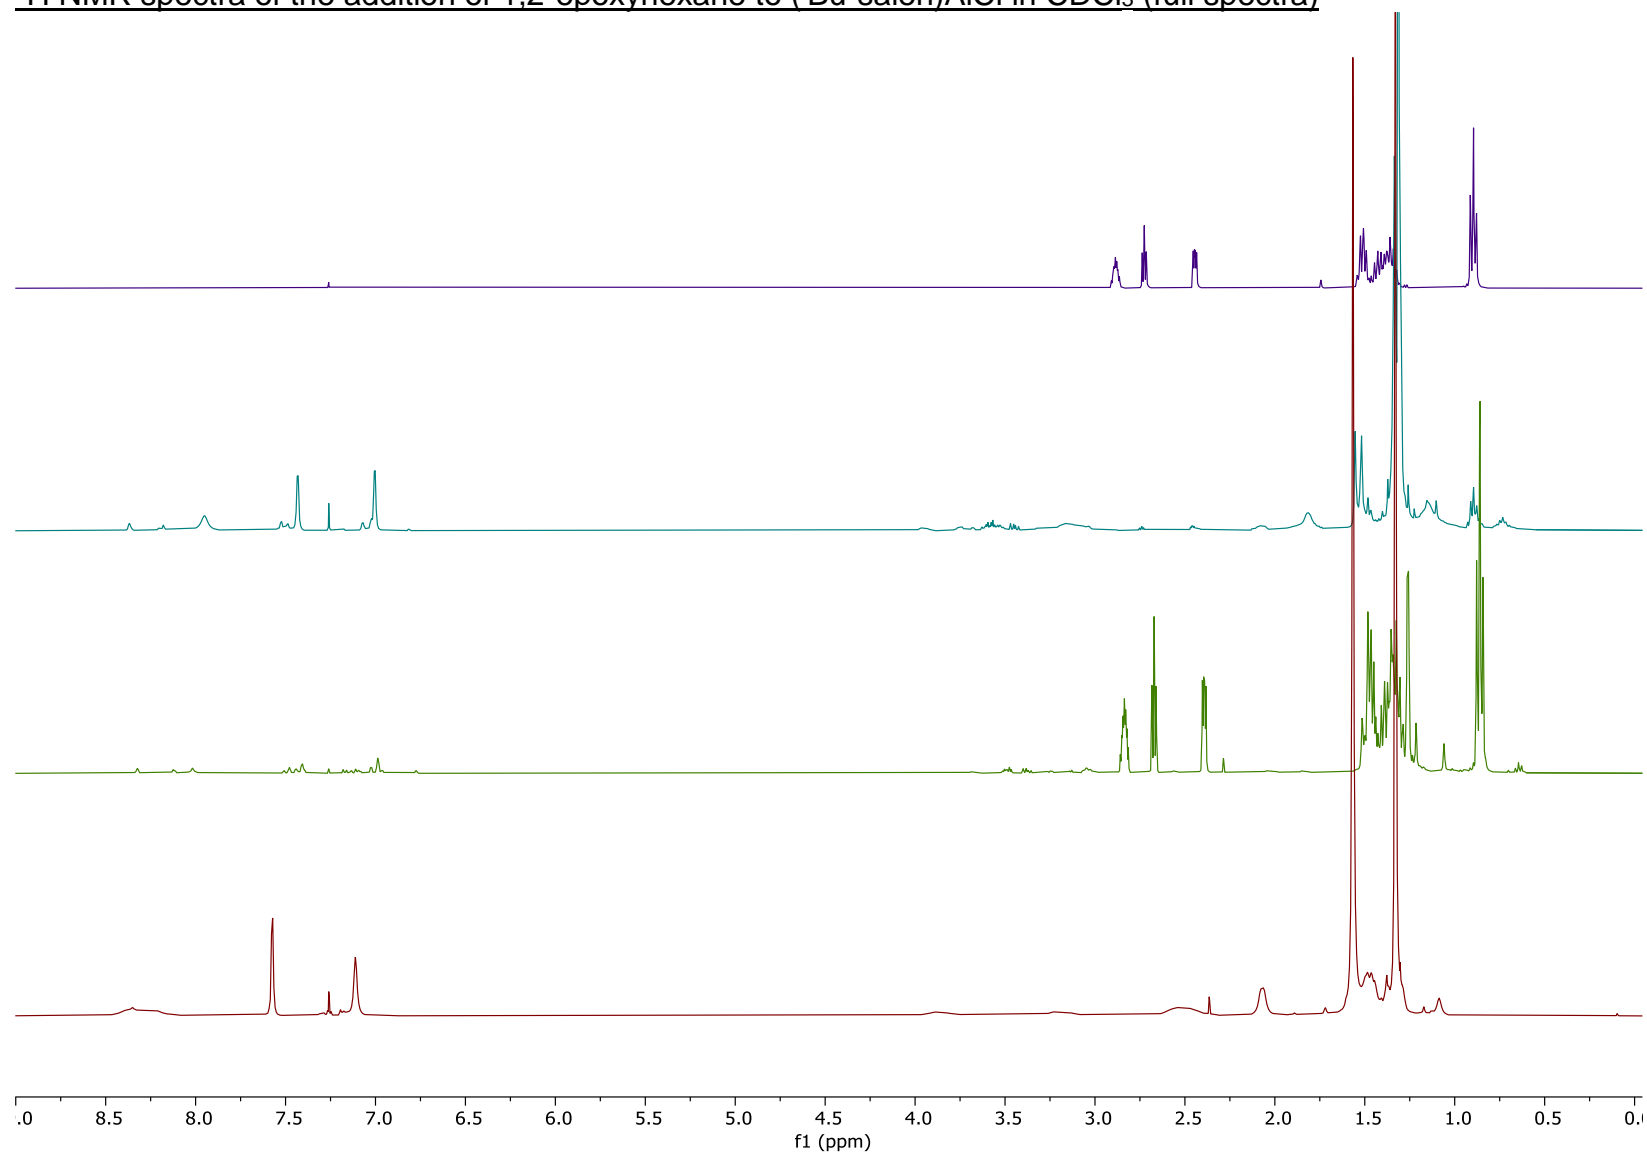

From bottom to top:  $(^t\text{Bu-salen})\text{AlCl}$ ;  $(^t\text{Bu-salen})\text{AlCl}$  and excess 1,2-epoxyhexane;  $(^t\text{Bu-salen})\text{AlCl}$  after evaporation of excess 1,2-epoxyhexane; and 1,2-epoxyhexane.

$^1\text{H}$  NMR spectra of the addition of 1,2-epoxyhexane to  $(^t\text{Bu-salen})\text{AlCl}$  in  $\text{CDCl}_3$  (9.0–6.5 ppm)

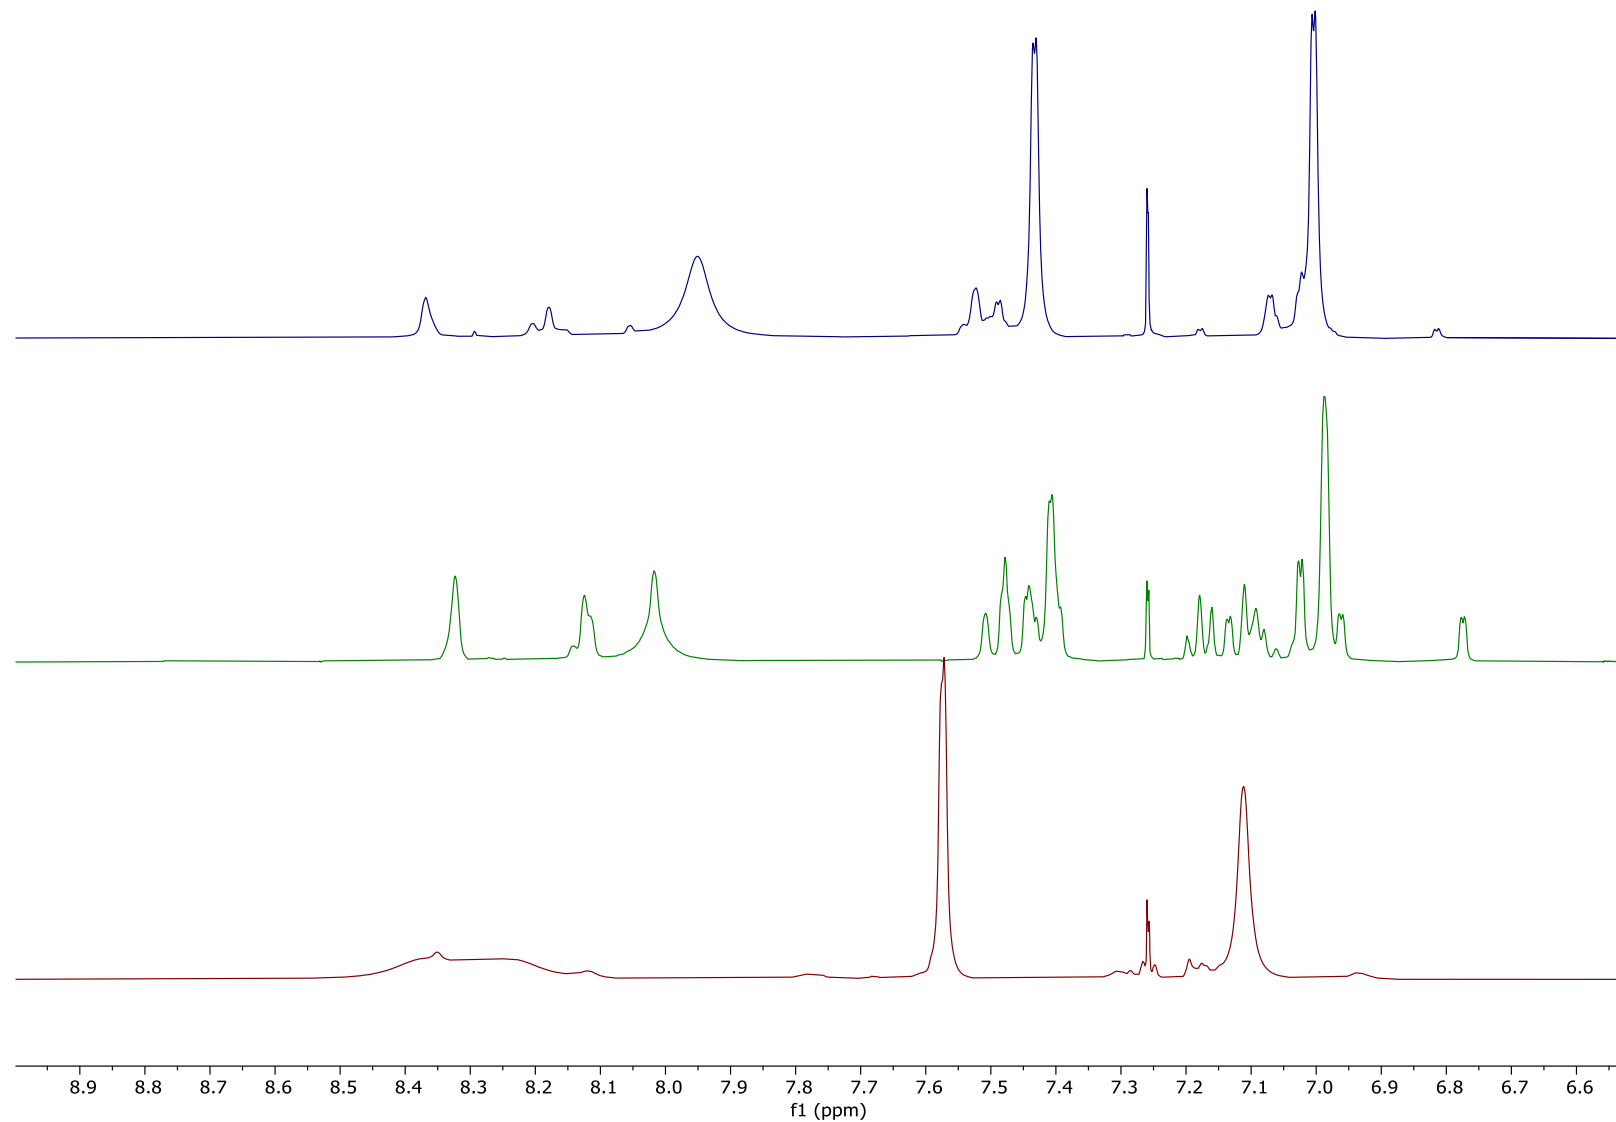

From bottom to top:  $(^t\text{Bu-salen})\text{AlCl}$ ;  $(^t\text{Bu-salen})\text{AlCl}$  and excess 1,2-epoxyhexane;  $(^t\text{Bu-salen})\text{AlCl}$  after evaporation of excess 1,2-epoxyhexane.



$^1\text{H}$  NMR spectra of the addition of 1,2-epoxyhexane to  $(^t\text{Bu-salen})\text{AlCl}$  in  $\text{CDCl}_3$  (4.5–2.2 ppm)

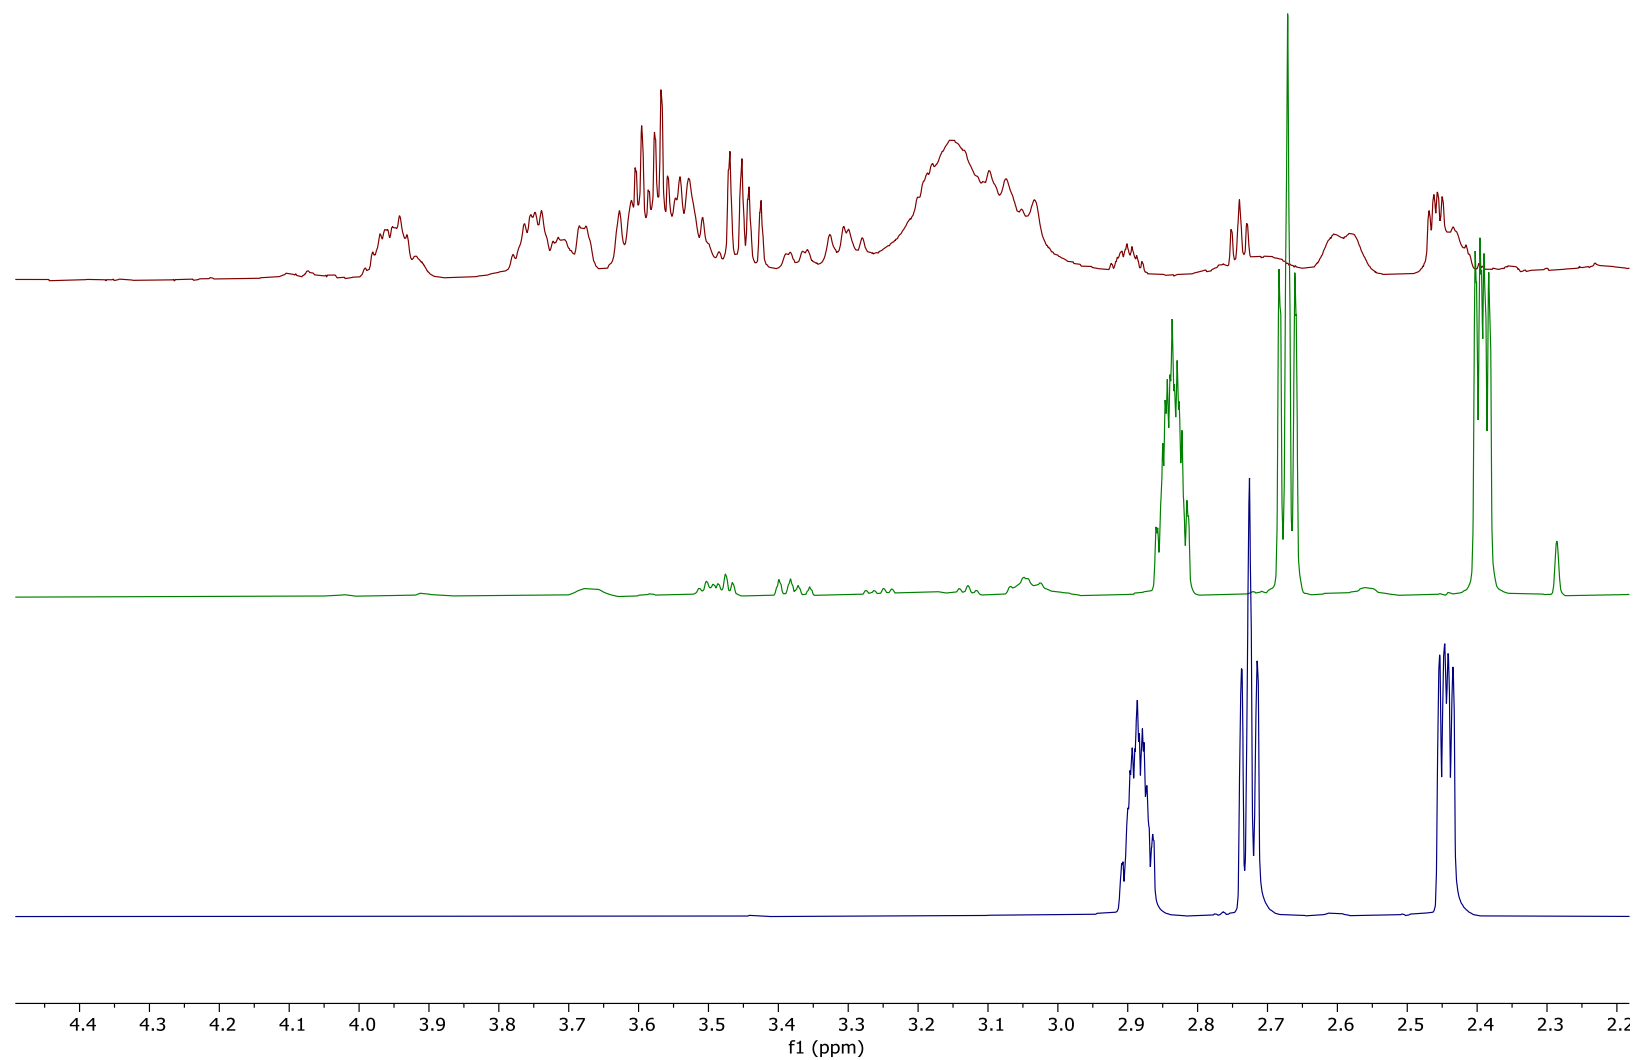

From bottom to top: 1,2-epoxyhexane;  $(^t\text{Bu-salen})\text{AlCl}$  and excess 1,2-epoxyhexane;  $(^t\text{Bu-salen})\text{AlCl}$  after evaporation of excess 1,2-epoxyhexane.

$^1\text{H}$  NMR spectra of the addition of 1,2-epoxyhexane to complex **1**.TFA in  $\text{CDCl}_3$  (full spectra)

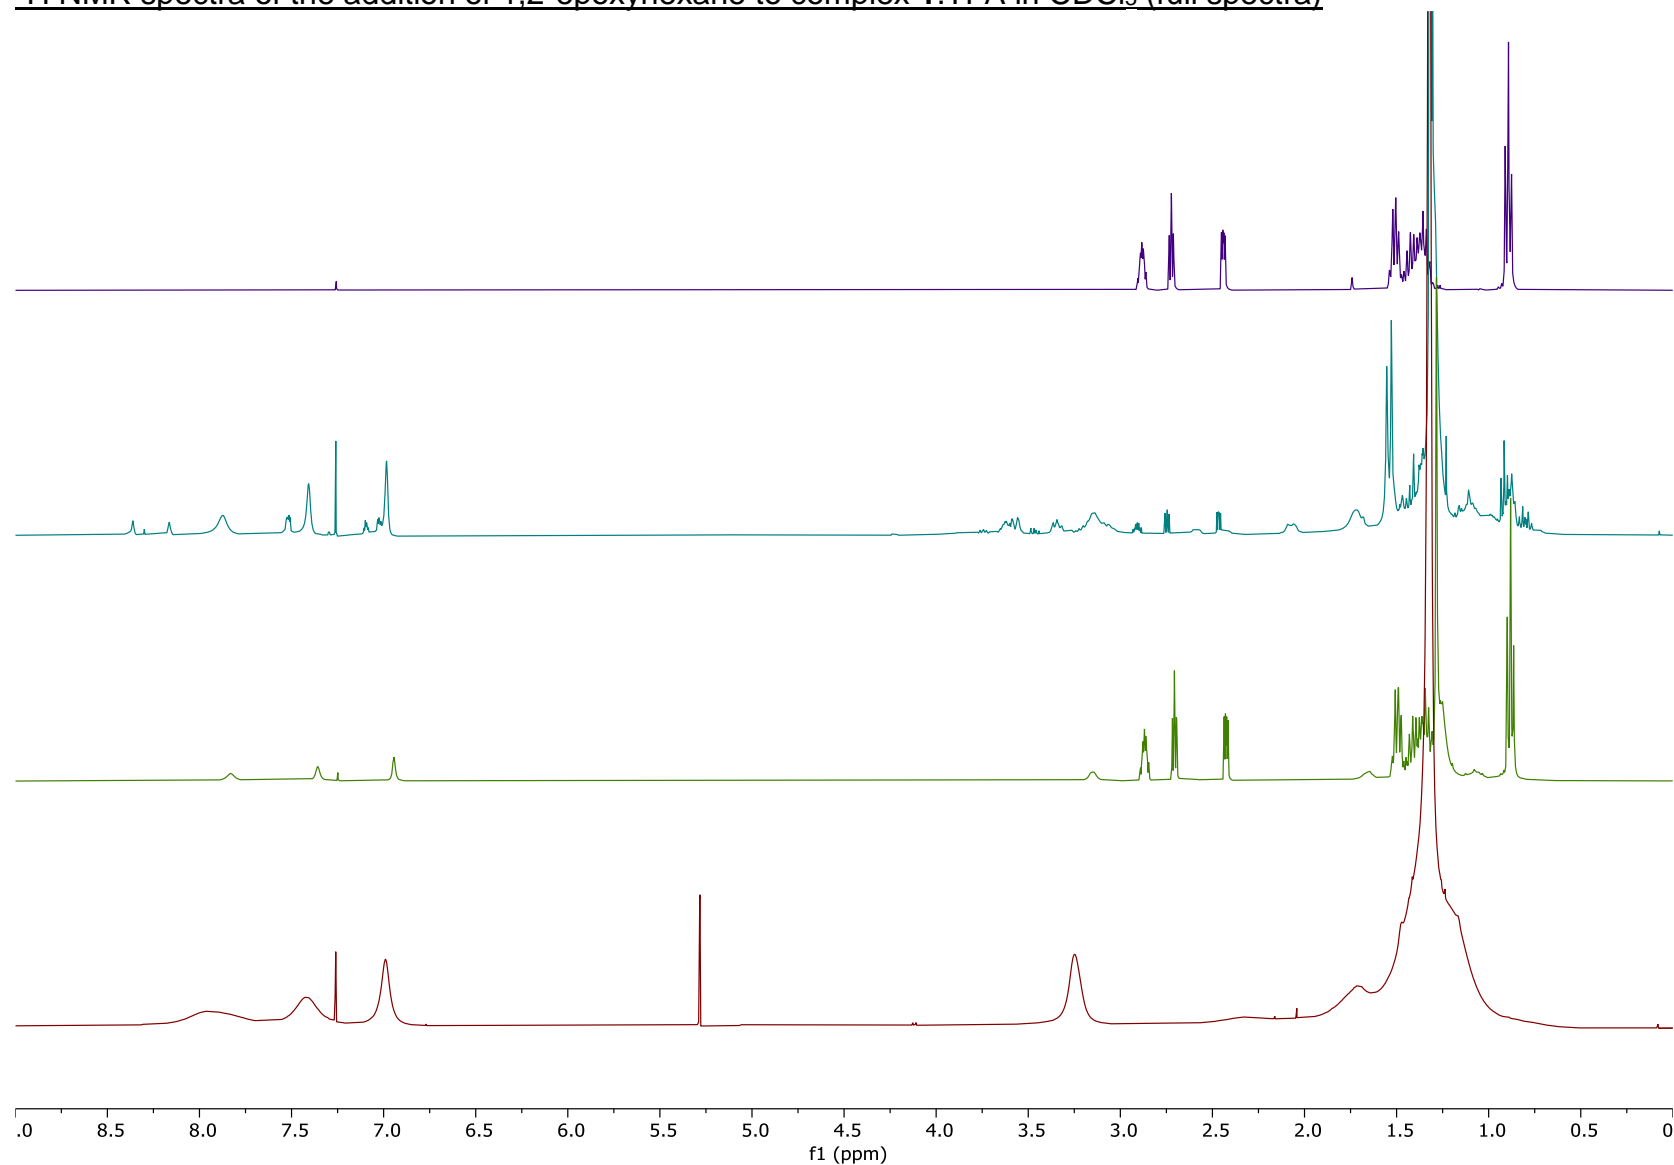

From bottom to top: complex **1**.TFA; complex **1**.TFA and excess 1,2-epoxyhexane; complex **1**.TFA after evaporation of excess 1,2-epoxyhexane; and 1,2-epoxyhexane.

$^1\text{H}$  NMR spectra of the addition of 1,2-epoxyhexane to complex **1**.TFA in  $\text{CDCl}_3$  (9.0–6.5 ppm)

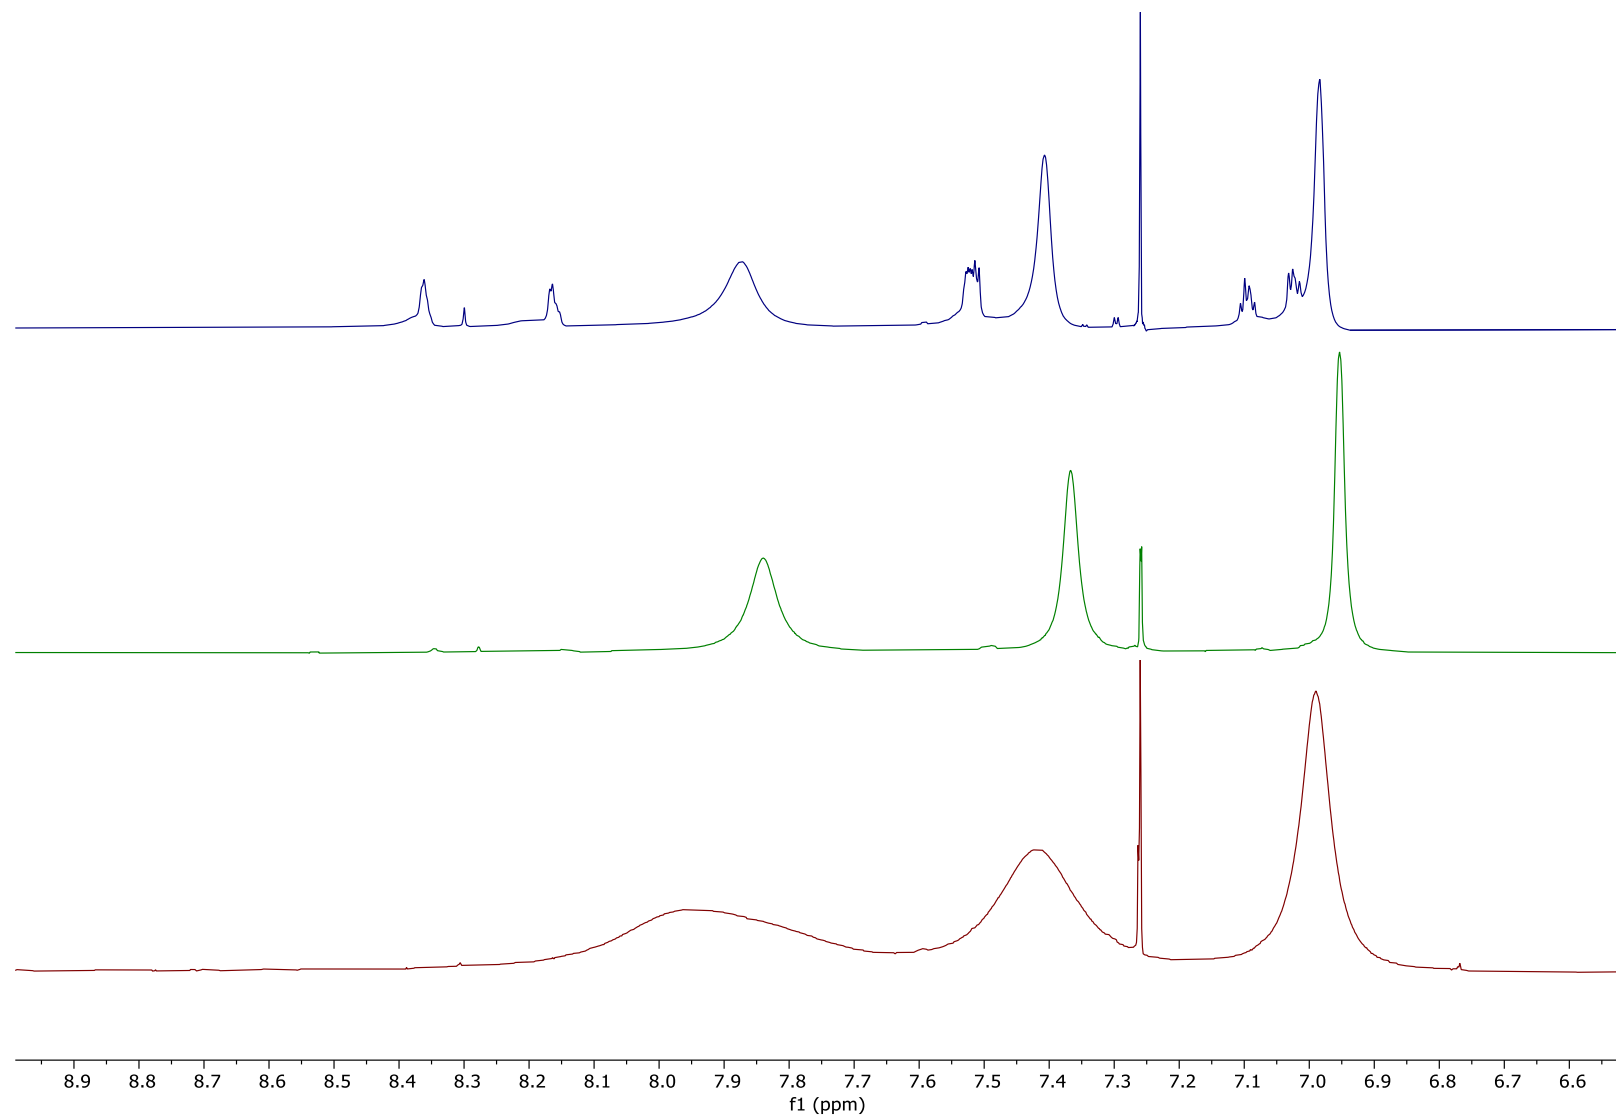

From bottom to top: complex **1**.TFA; complex **1**.TFA and excess 1,2-epoxyhexane; complex **1**.TFA after evaporation of excess 1,2-epoxyhexane.

$^1\text{H}$  NMR spectra of the addition of 1,2-epoxyhexane to complex **1**.TFA in  $\text{CDCl}_3$  (4.5–2.2 ppm)

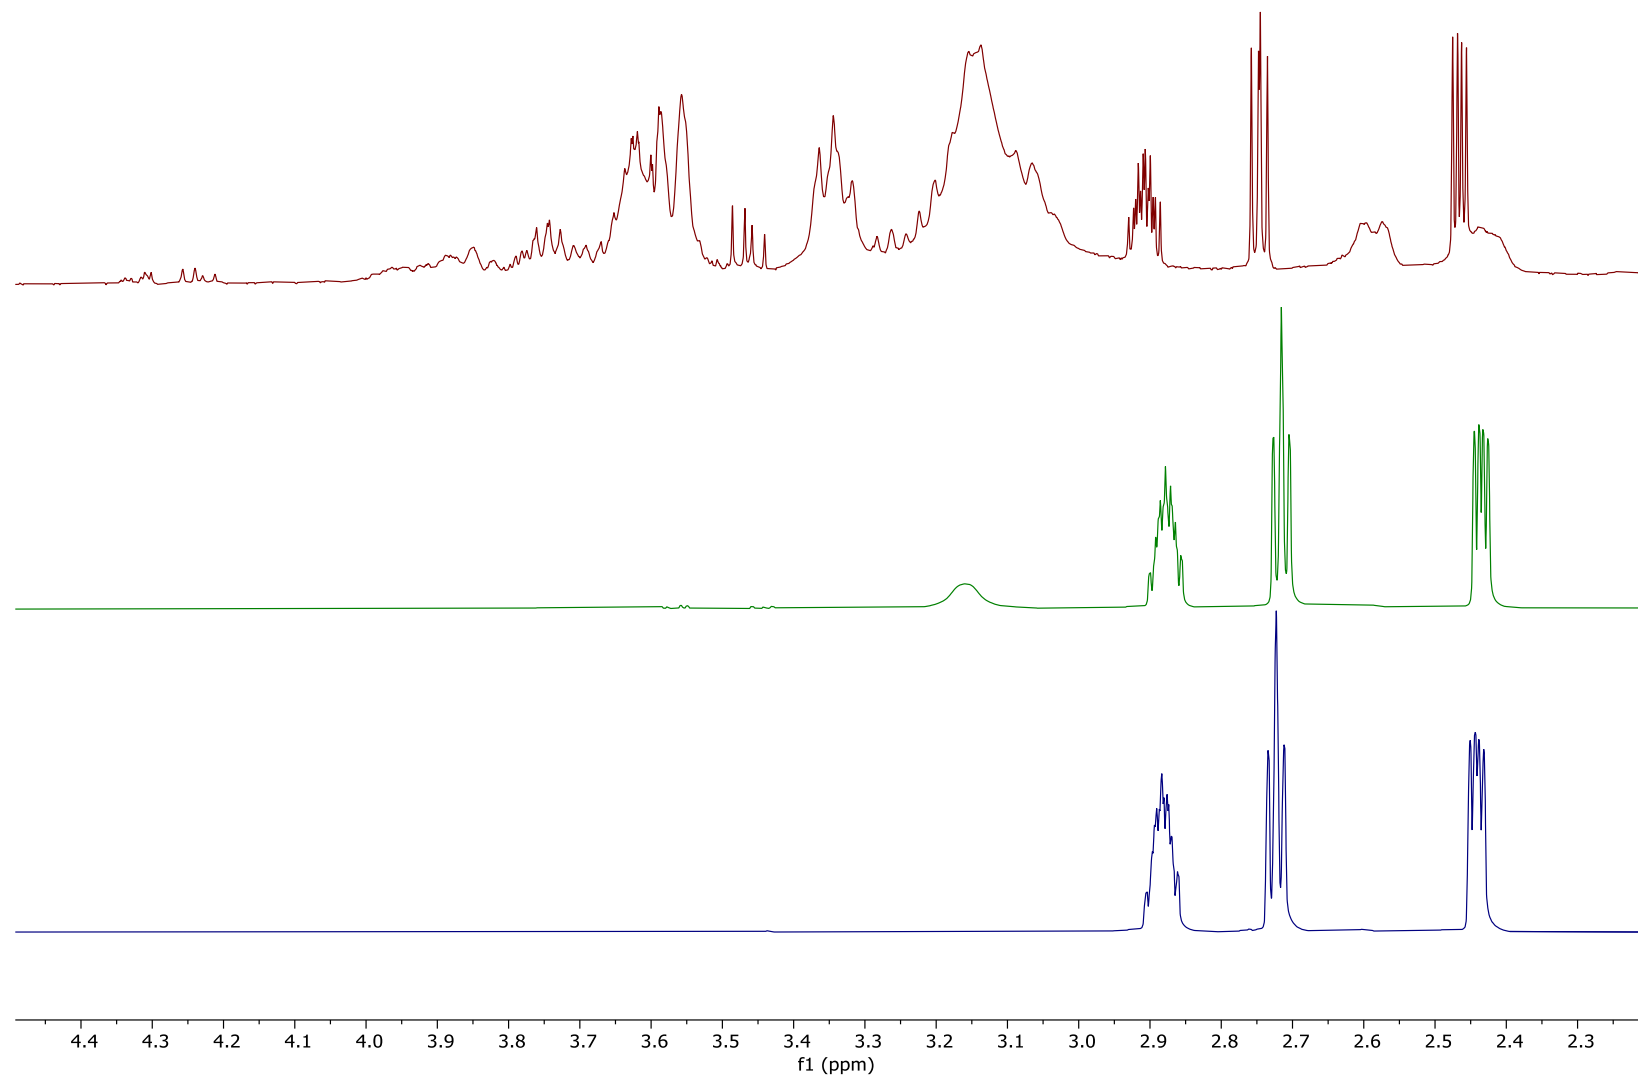

From bottom to top: 1,2-epoxyhexane; complex **1**.TFA and excess 1,2-epoxyhexane; complex **1**.TFA after evaporation of excess 1,2-epoxyhexane.

$^{13}\text{C}$  NMR spectrum of the addition of 1,2-epoxyhexane to complex 1.TFA in  $\text{CDCl}_3$

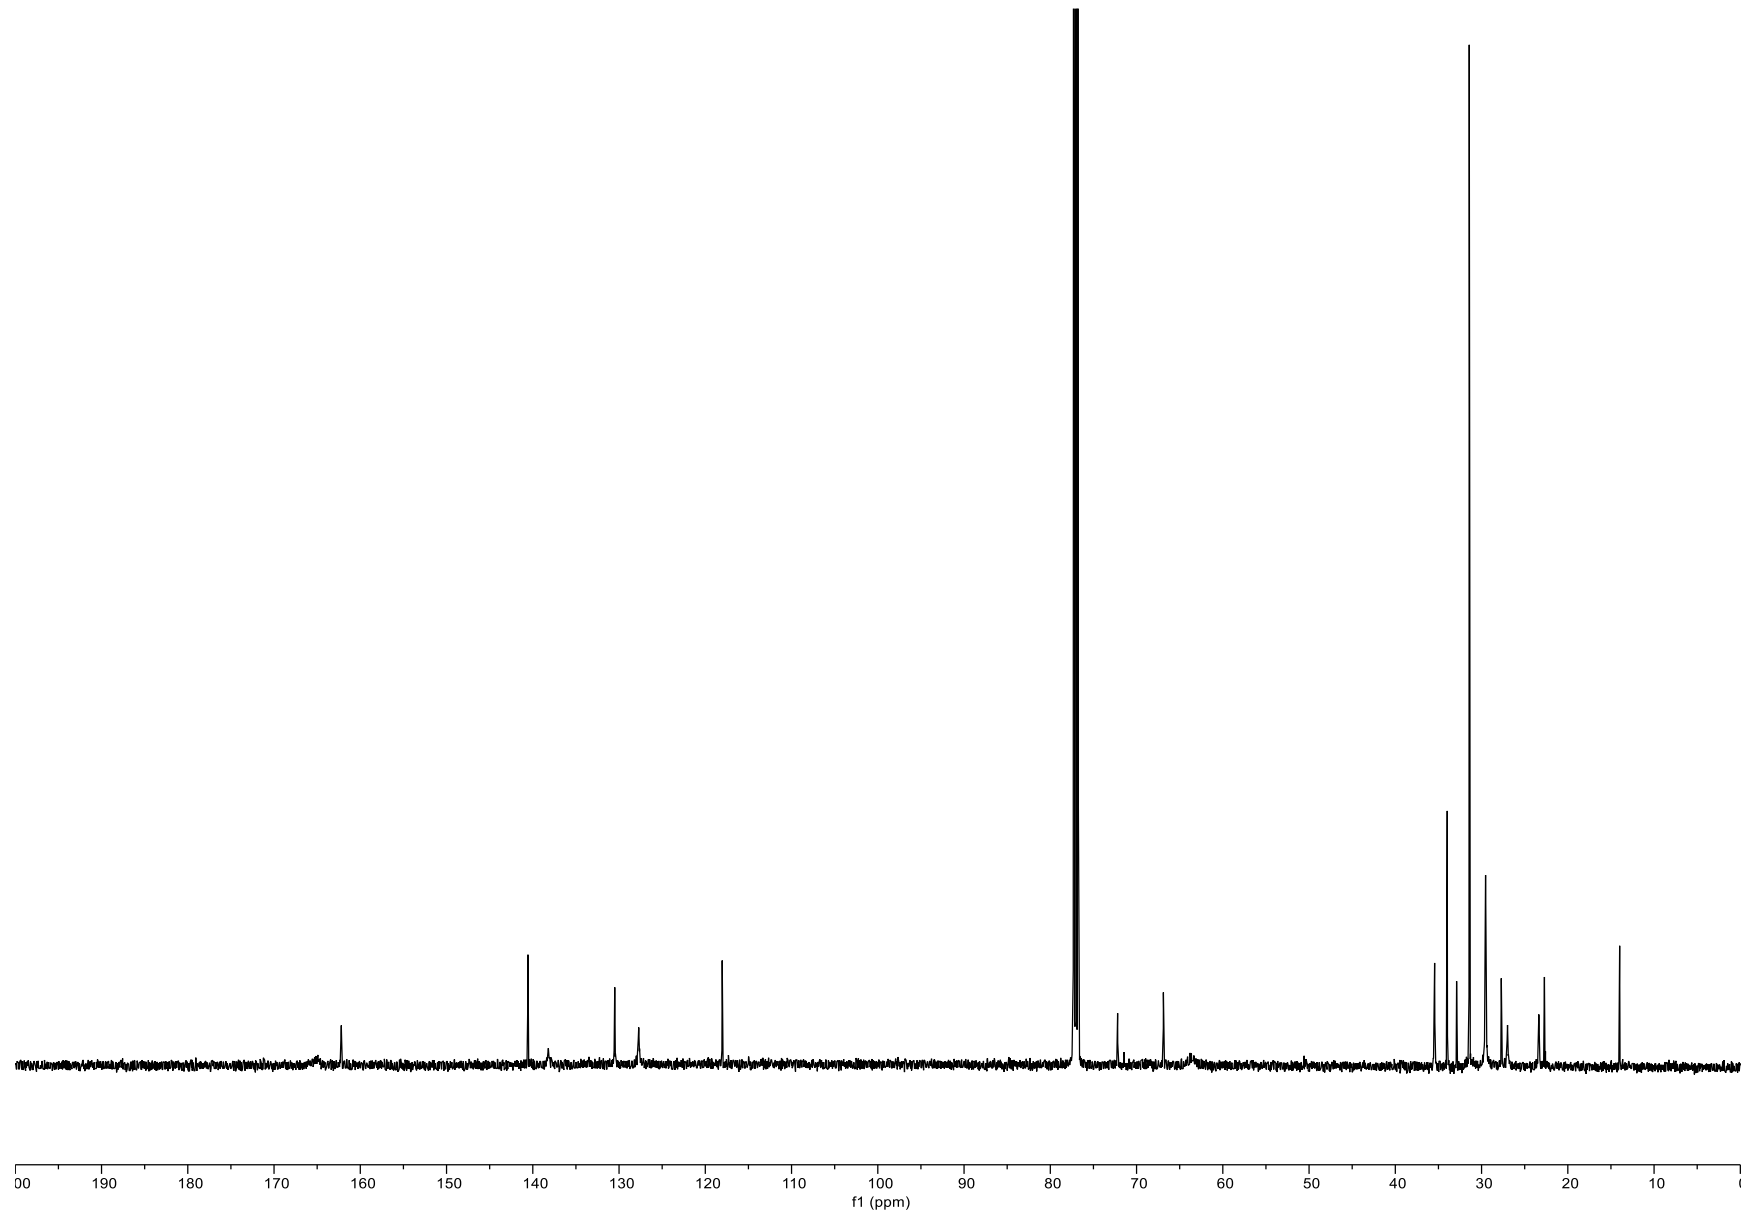

S61

$^1\text{H}$  NMR spectra of the addition of 1,2-epoxyhexane to complex **9** in  $\text{CDCl}_3$  (full spectra)

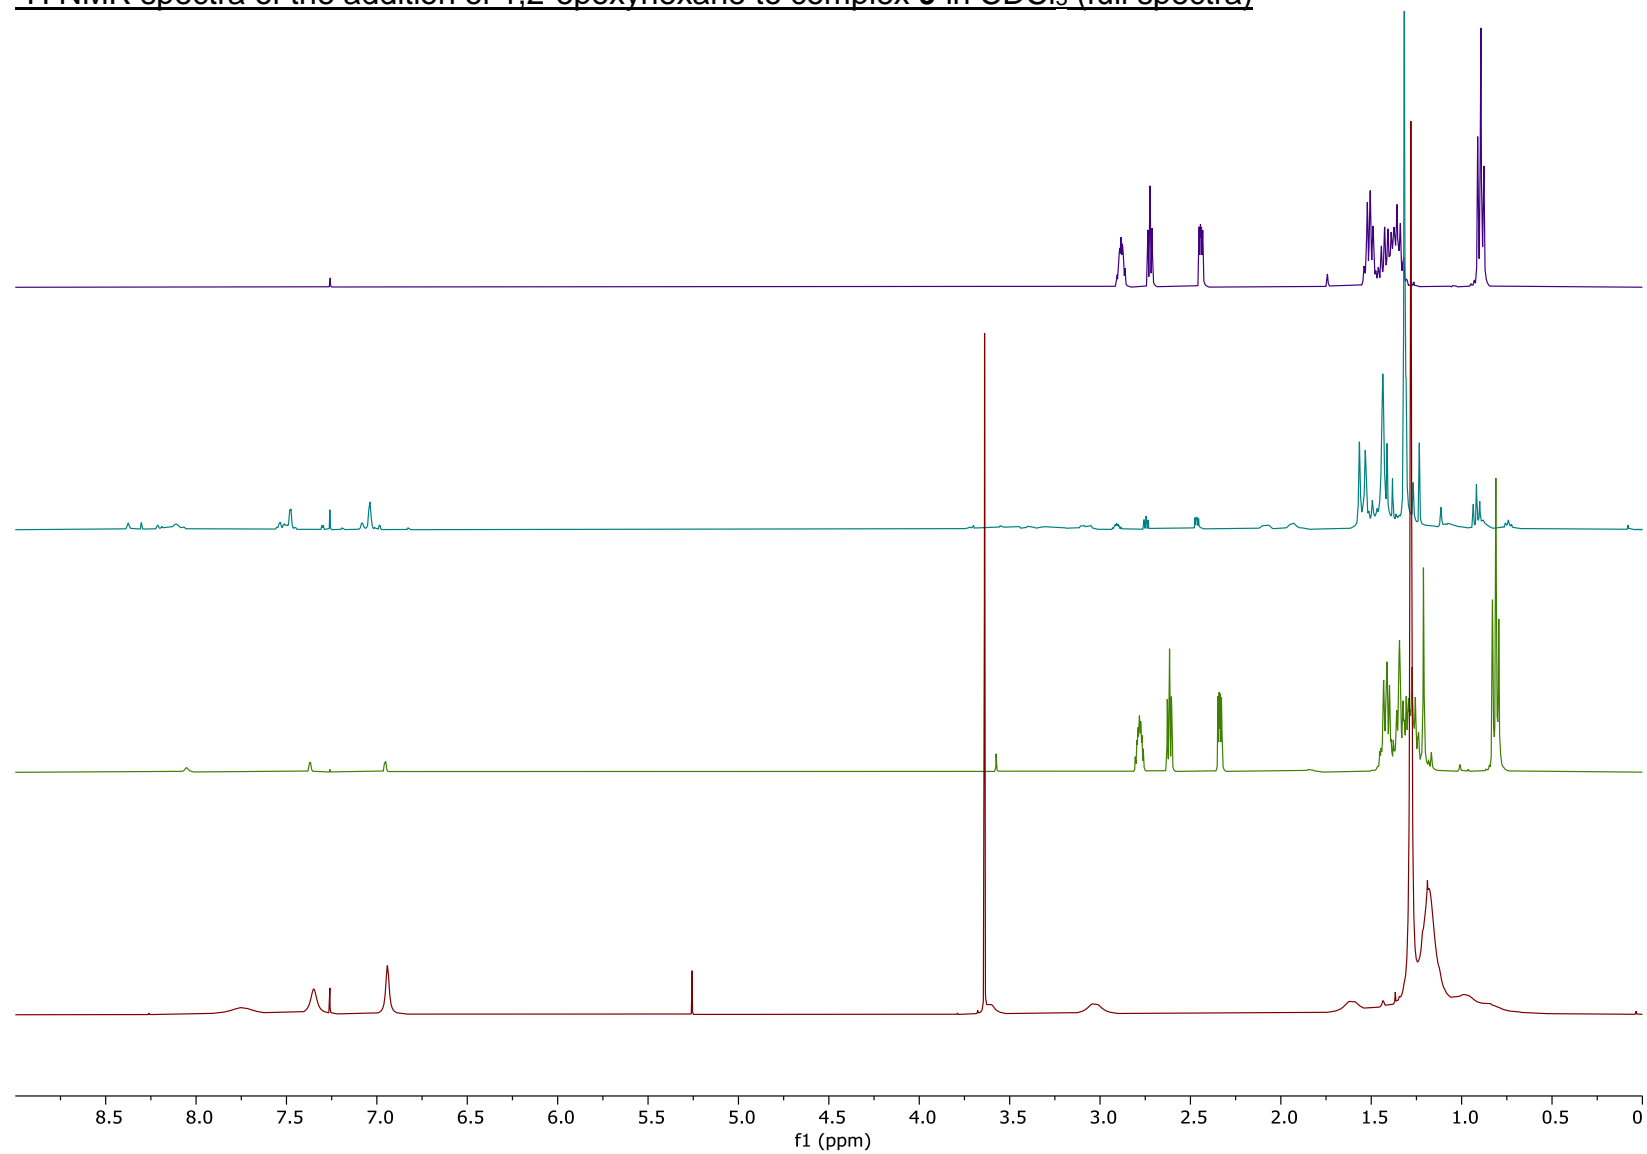

From bottom to top: complex **9**; complex **9** and excess 1,2-epoxyhexane; complex **9** after evaporation of excess 1,2-epoxyhexane; and 1,2-epoxyhexane.

$^1\text{H}$  NMR spectra of the addition of 1,2-epoxyhexane to complex **9** in  $\text{CDCl}_3$  (8.5–6.5 ppm)

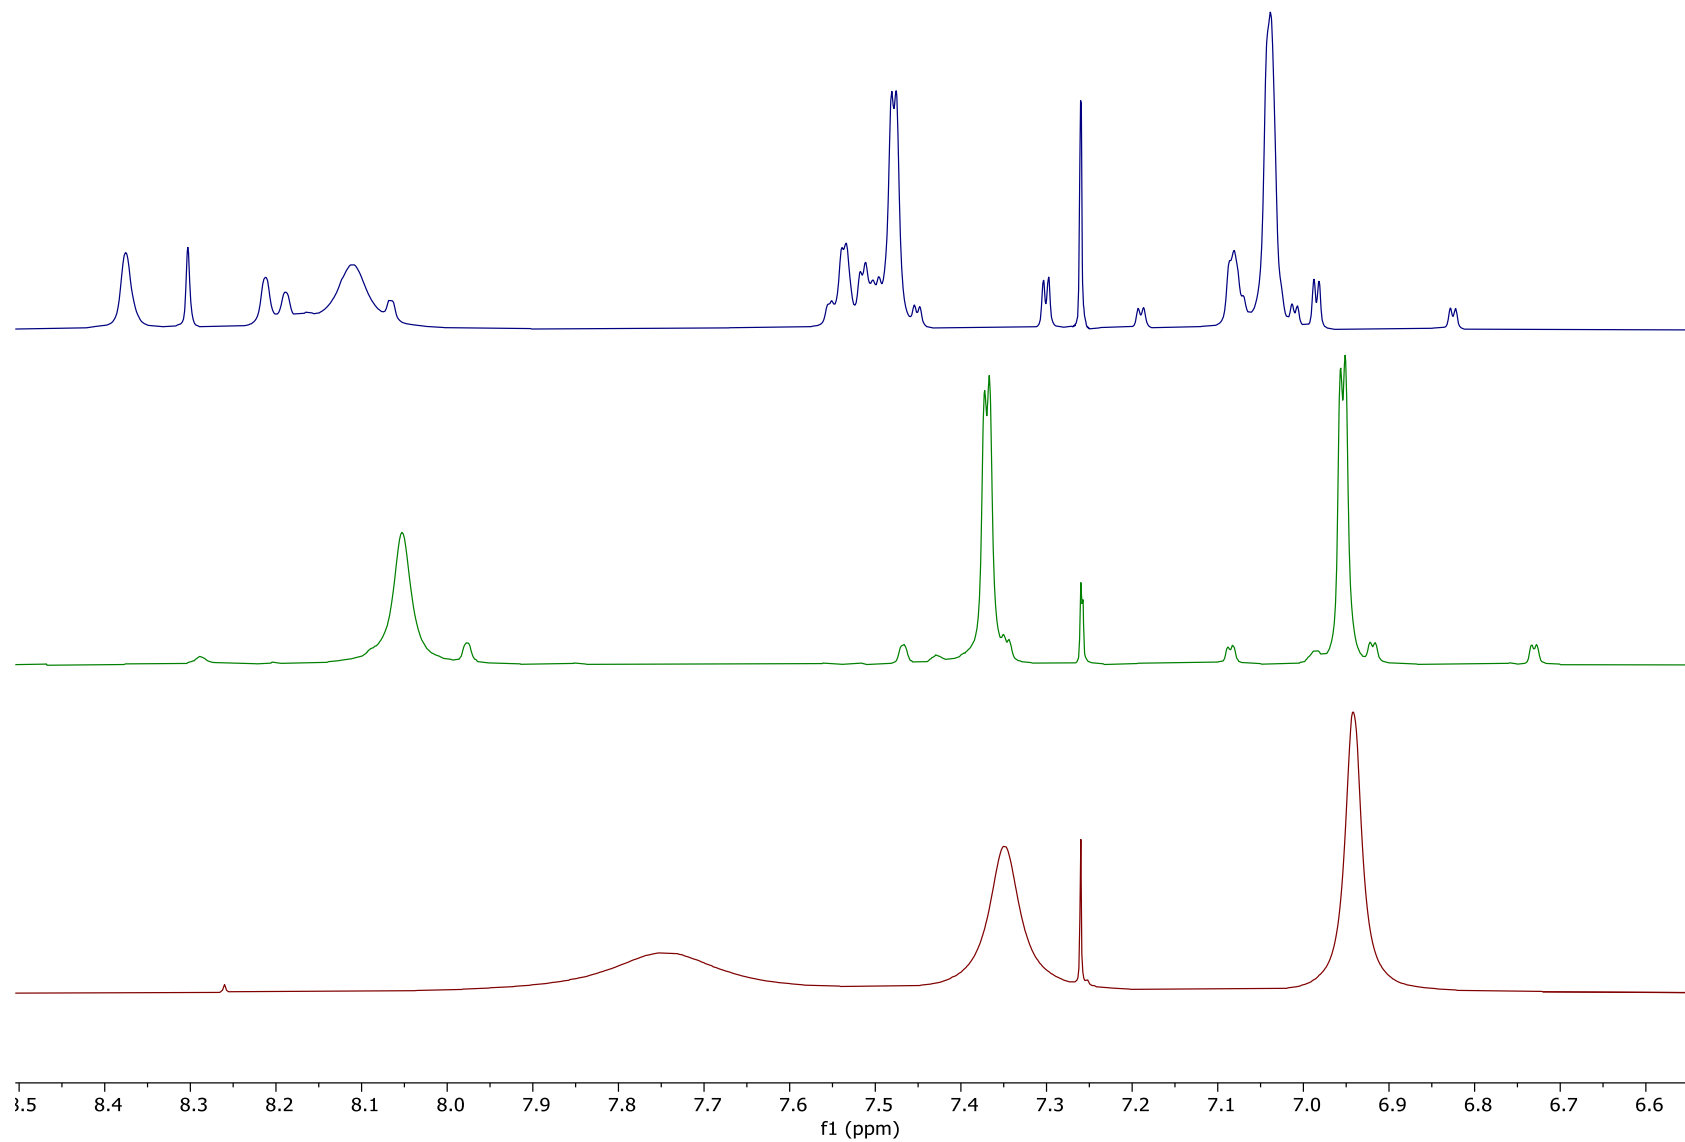

From bottom to top: complex **9**; complex **9** and excess 1,2-epoxyhexane; complex **9** after evaporation of excess 1,2-epoxyhexane.

$^1\text{H}$  NMR spectra of the addition of 1,2-epoxyhexane to complex **9** in  $\text{CDCl}_3$  (4.5–2.0 ppm)

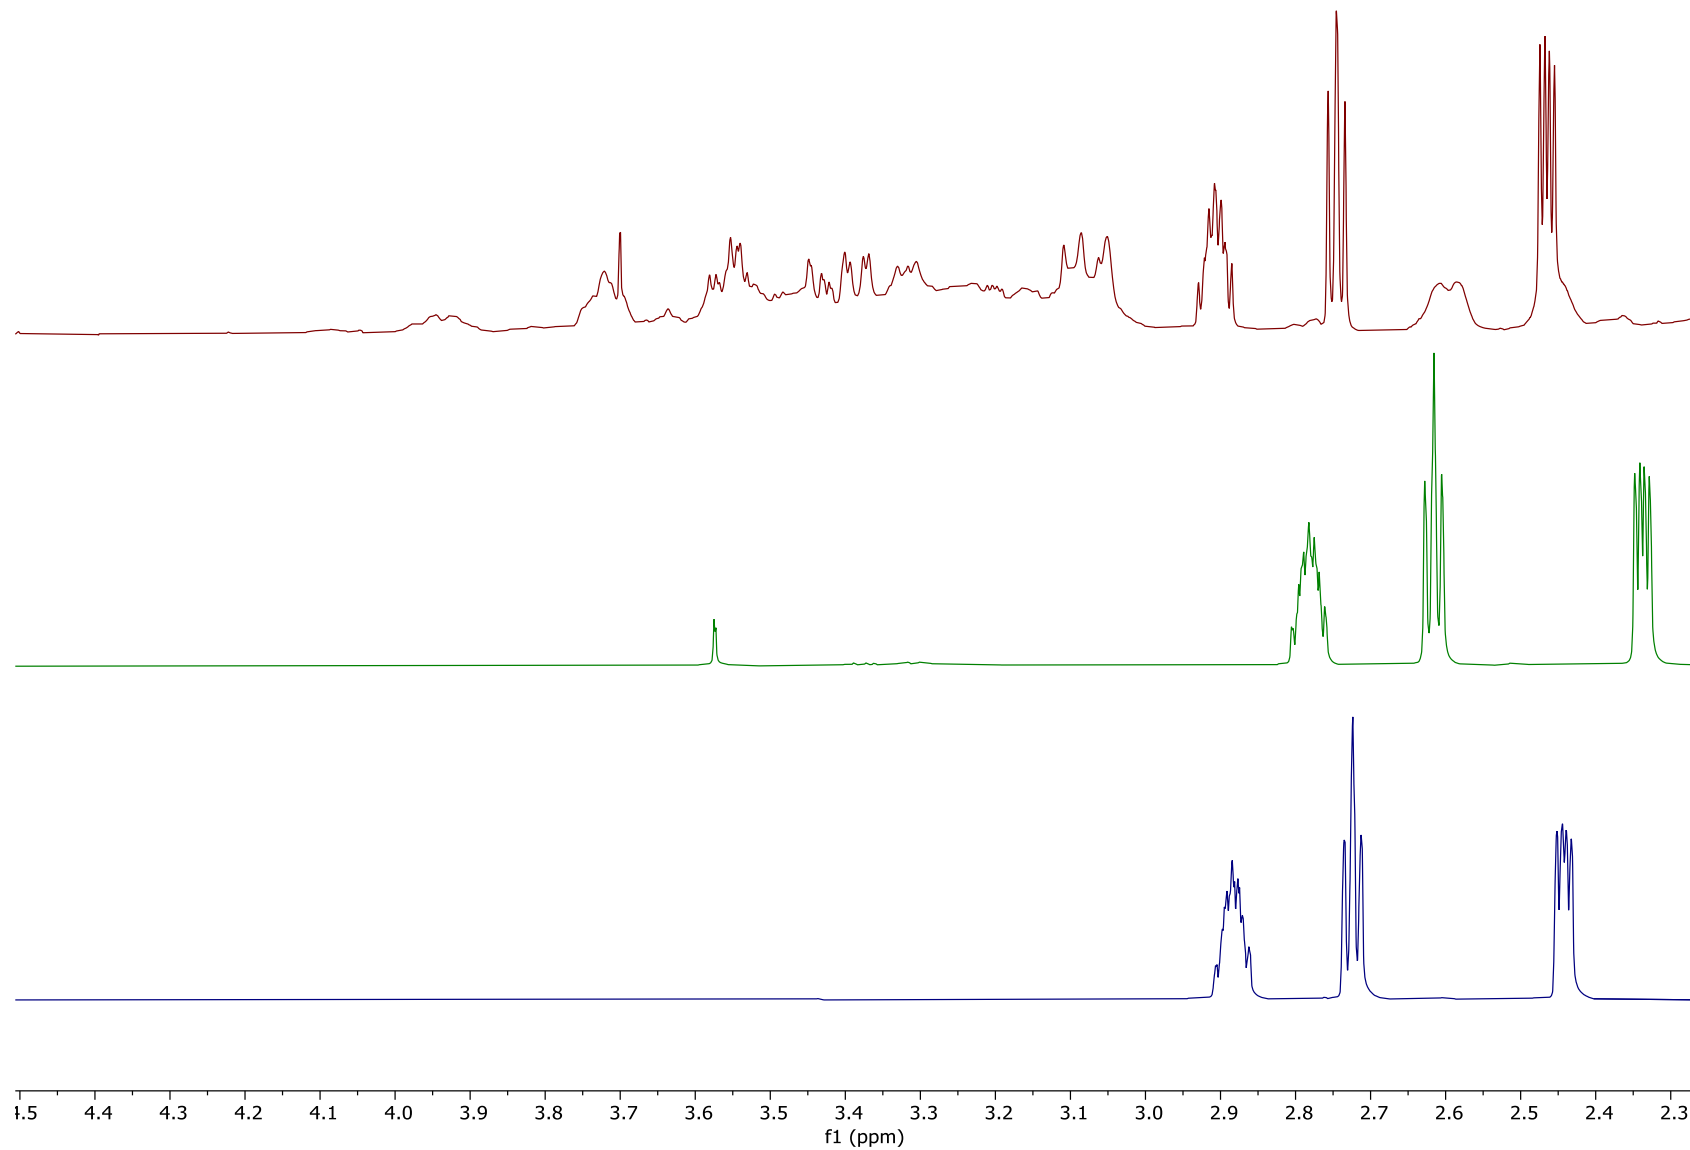

From bottom to top: 1,2-epoxyhexane; complex **9** and excess 1,2-epoxyhexane; complex **9** after evaporation of excess 1,2-epoxyhexane.



## Line shape analysis

### Methodology

Line shapes were modelled using WinDNMR-Pro.<sup>1</sup> Parameters from the actual spectrum recorded at the lowest temperature were used to establish the model, then the exchange rate constant was varied to give a simulation of the line shape that best matched the actual spectrum recorded at each temperature. Having determined the rate constant at each temperature,  $\Delta G^\ddagger$  could be calculated at each temperature using equation 1.

$$1. \Delta G^\ddagger = \frac{RT[\ln(k_B \cdot h^{-1} \cdot T) - \ln(k)]}{1000} \quad \text{kJ mol}^{-1}$$

Where  $R = 8.3144 \text{ J mol}^{-1} \text{ K}^{-1}$   
 $k_B = 1.38 \times 10^{-23} \text{ J K}^{-1}$   
 $h = 6.63 \times 10^{-34} \text{ J s}^{-1}$   
 $T = \text{temperature in K}$   
 $k = \text{the rate constant at temperature T in s}^{-1}$

$\Delta H^\ddagger$  and  $\Delta S^\ddagger$  could then be obtained graphically using the form of the Eyring equation given in equation 2.

$$2. \ln(k \cdot T^{-1}) = \frac{-\Delta H^\ddagger}{RT} + \frac{\Delta S^\ddagger}{R} + \ln(k_B \cdot h^{-1})$$

In a plot of  $\ln(k \cdot T^{-1})$  versus  $T^{-1}$ , the gradient will be  $(-\Delta H^\ddagger/R)$  and the intercept will be  $[(\Delta S^\ddagger/R) + \ln(k_B \cdot h^{-1})]$ .

Hence  $\Delta H^\ddagger$  can be obtained from equation 3.

$$3. \Delta H^\ddagger = -\text{gradient} \times R$$

And  $\Delta S^\ddagger$  can be obtained from equation 4.

$$4. \Delta S^\ddagger = R \times [\text{intercept} - \ln(k_B \cdot h^{-1})] = R \times (\text{intercept} - 23.76)$$

## 1.TFA

The parameters used were:

| Peak (as labelled in Figure 8) | Frequency (Hz) | Half width (Hz) | % intensity |
|--------------------------------|----------------|-----------------|-------------|
| a: set 1                       | 770.0          | 17              | 16.0        |
| c: set 2                       | 702.0          | 8               | 34.6        |
| d: set 2                       | 669.0          | 7               | 32.8        |
| b: set 1                       | 567.0          | 16              | 16.6        |

The two sets of *tert*-butyl signals were simulated separately, each as a two spin uncoupled system. The actual peak shapes at each temperature were then best simulated by simulations with the following rate constants for the exchange process and this allowed  $\Delta G^\ddagger$  at each temperature to be calculated using equation 1. The average value of these 24 calculations of  $\Delta G^\ddagger$  is 56.9 kJ mol<sup>-1</sup> and all the values are within +/- 1.3 kJ mol<sup>-1</sup> of this average.

| Temperature (K) | set 1                |                                             | set 2                |                                             |
|-----------------|----------------------|---------------------------------------------|----------------------|---------------------------------------------|
|                 | k (s <sup>-1</sup> ) | $\Delta G^\ddagger$ (kJ mol <sup>-1</sup> ) | k (s <sup>-1</sup> ) | $\Delta G^\ddagger$ (kJ mol <sup>-1</sup> ) |
| 233             | 1.5                  | 55.8                                        | 0.5                  | 57.93                                       |
| 243             | 5                    | 55.9                                        | 2                    | 57.70                                       |
| 253             | 15                   | 55.9                                        | 6                    | 57.85                                       |
| 263             | 45                   | 55.8                                        | 17                   | 57.94                                       |
| 273             | 120                  | 55.8                                        | 49                   | 57.83                                       |
| 283             | 280                  | 55.9                                        | 129                  | 57.76                                       |
| 293             | 757                  | 55.6                                        | 300                  | 57.82                                       |
| 298             | 1000                 | 55.9                                        | 450                  | 57.85                                       |
| 303             | 1500                 | 55.8                                        | 650                  | 57.93                                       |
| 313             | 3000                 | 56.0                                        | 1400                 | 57.93                                       |
| 323             | 6000                 | 56.0                                        | 3000                 | 57.82                                       |
| 328             | 9000                 | 55.8                                        | 4300                 | 57.78                                       |

The simulated spectra (all with the same vertical and horizontal scales) are given below:

$k = 1.5 \text{ s}^{-1}$  (simulating the set 1 spectrum recorded at 233 K)

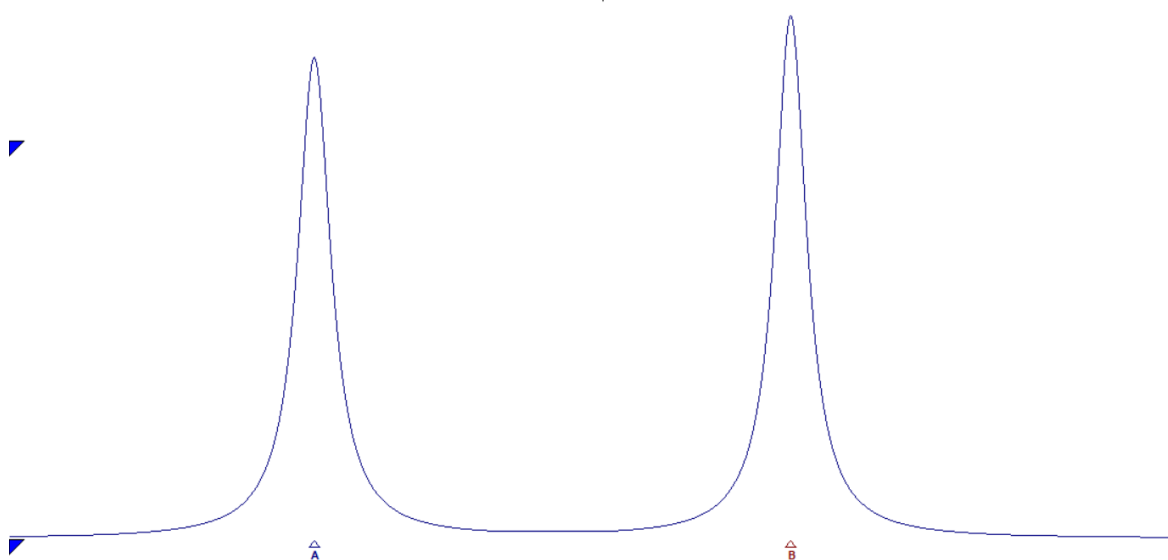

$k = 0.5 \text{ s}^{-1}$  (simulating the set 2 spectrum recorded at 233 K)

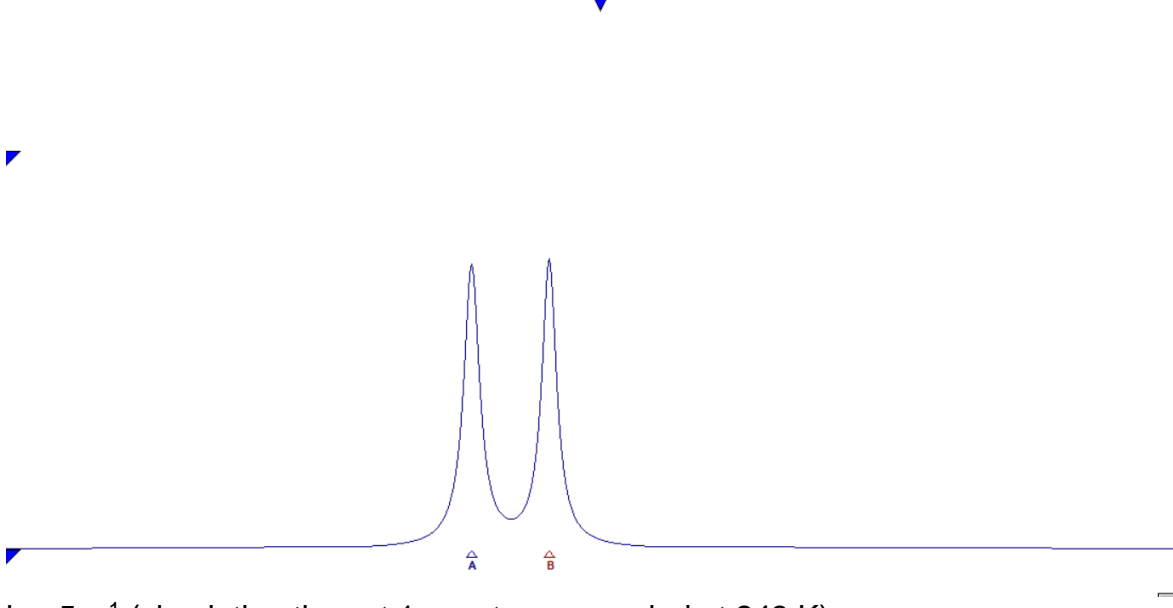

$k = 5 \text{ s}^{-1}$  (simulating the set 1 spectrum recorded at 243 K)

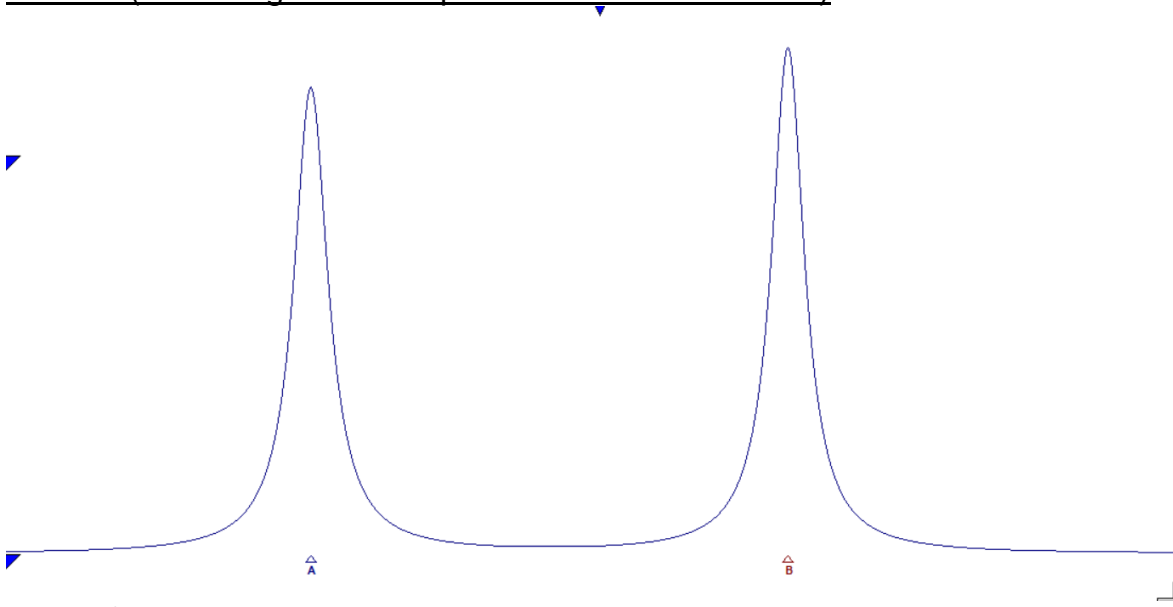

$k = 2 \text{ s}^{-1}$  (simulating the set 2 spectrum recorded at 243 K)

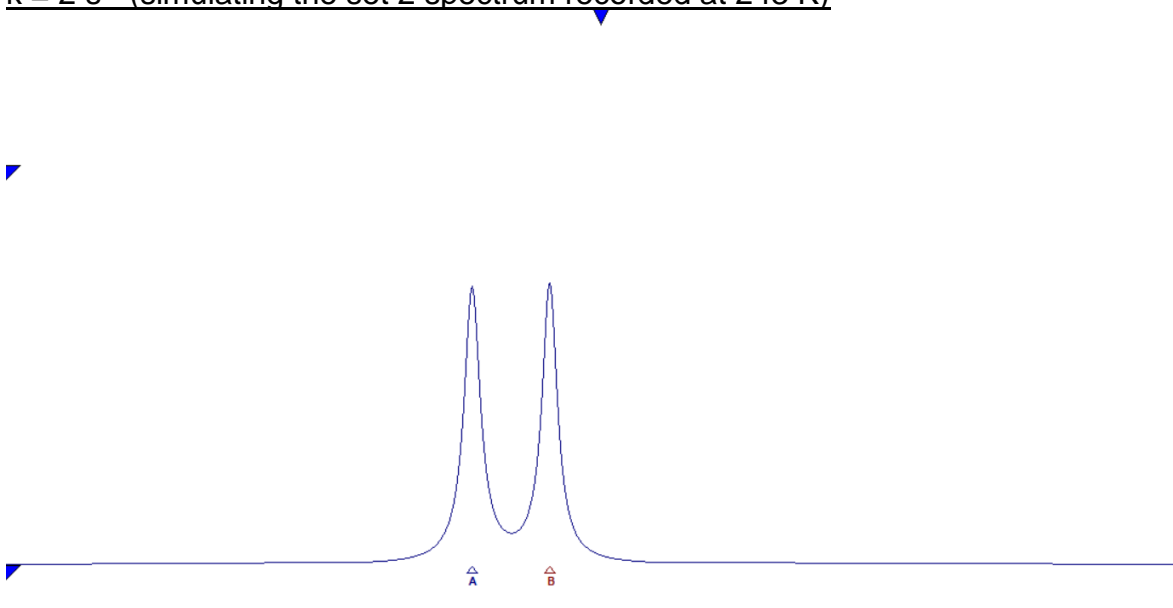

$k = 15 \text{ s}^{-1}$  (simulating the set 1 spectrum recorded at 253 K)

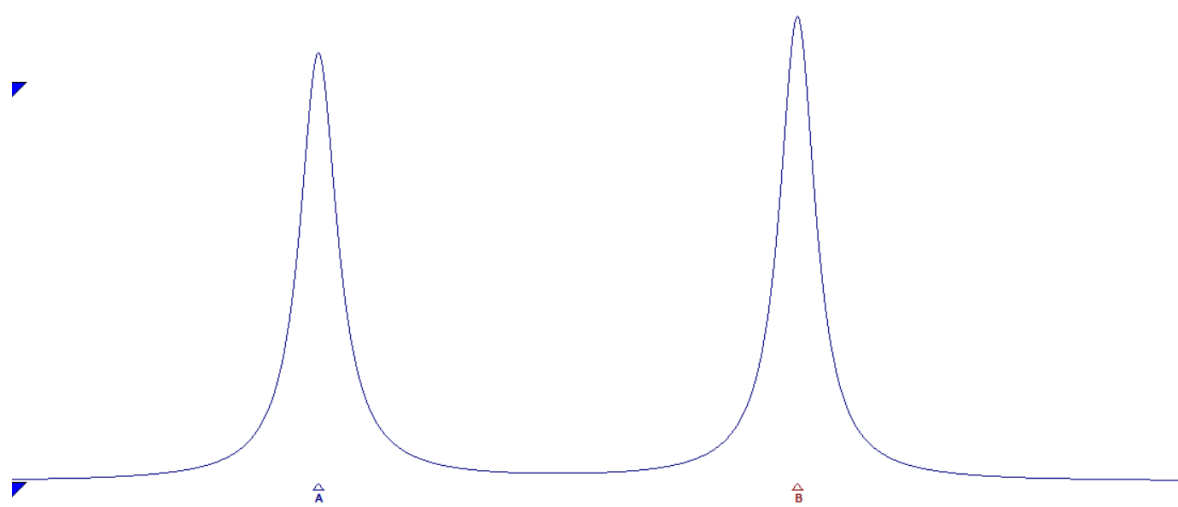

$k = 6 \text{ s}^{-1}$  (simulating the set 2 spectrum recorded at 253 K)

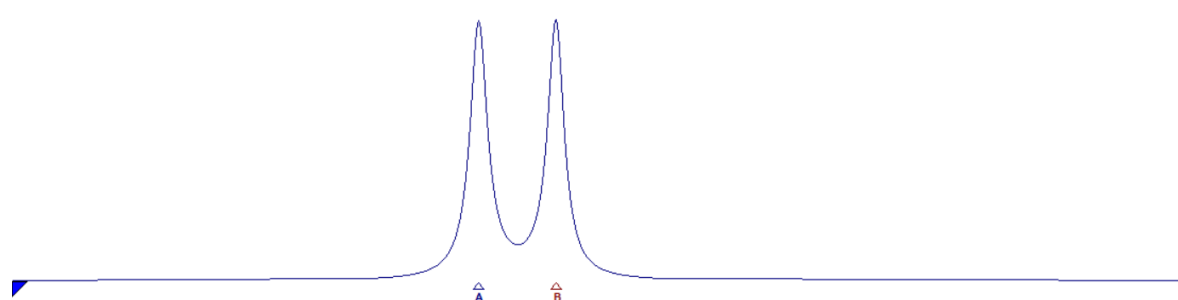

$k = 45 \text{ s}^{-1}$  (simulating the set 1 spectrum recorded at 263 K)

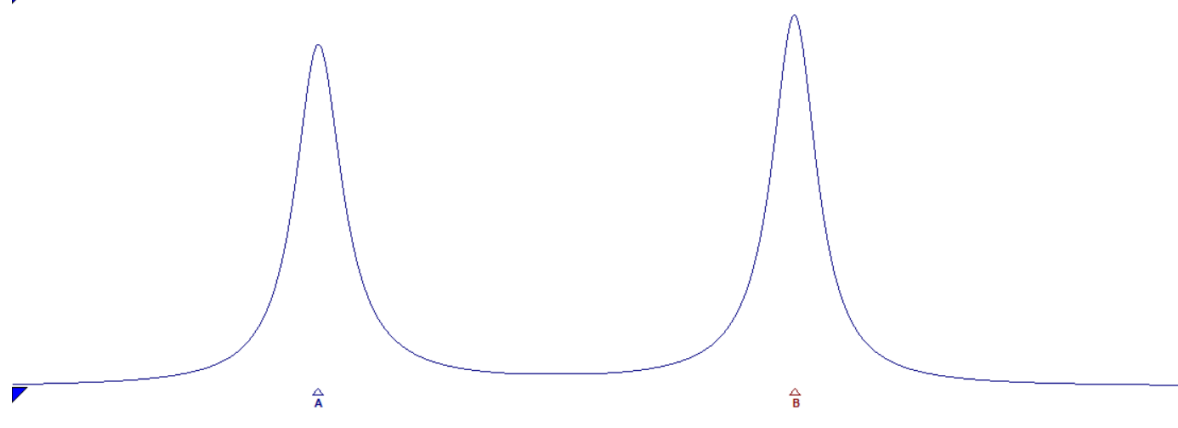

$k = 17 \text{ s}^{-1}$  (simulating the set 2 spectrum recorded at 263 K)

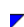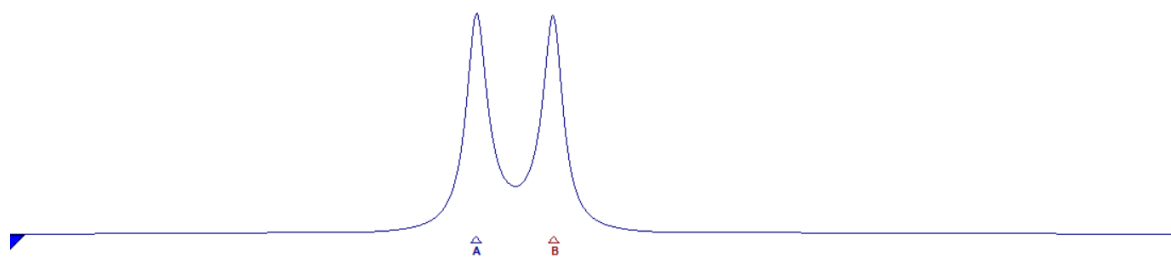

$k = 120 \text{ s}^{-1}$  (simulating the set 1 spectrum recorded at 273 K)

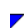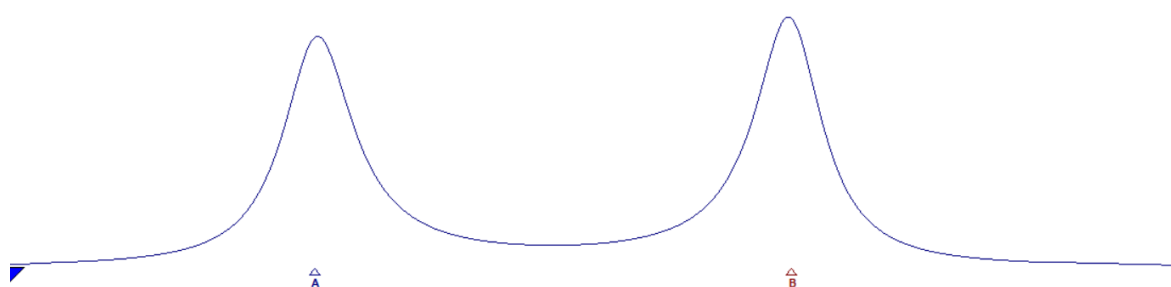

$k = 49 \text{ s}^{-1}$  (simulating the set 2 spectrum recorded at 273 K)

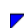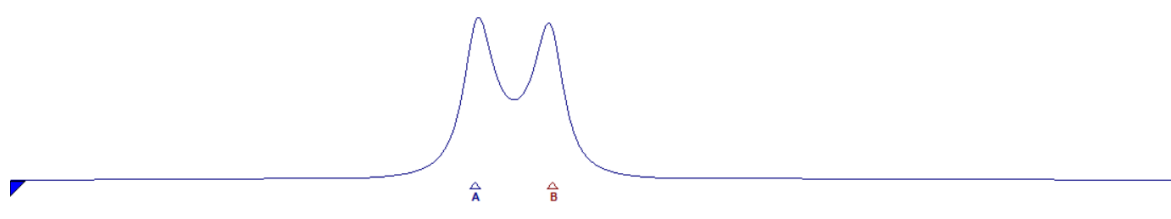

$k = 280 \text{ s}^{-1}$  (simulating the set 1 spectrum recorded at 283 K)

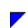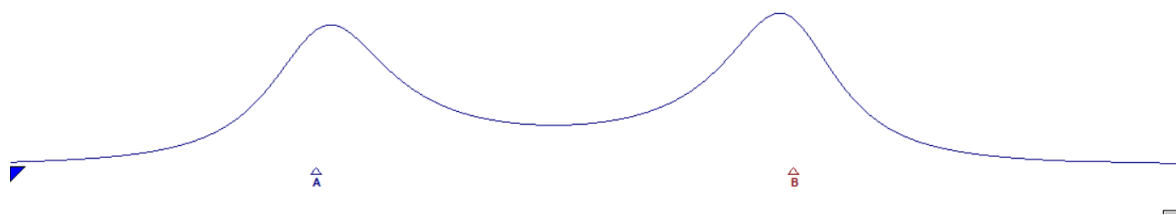

$k = 129 \text{ s}^{-1}$  (simulating the set 2 spectrum recorded at 283 K)

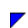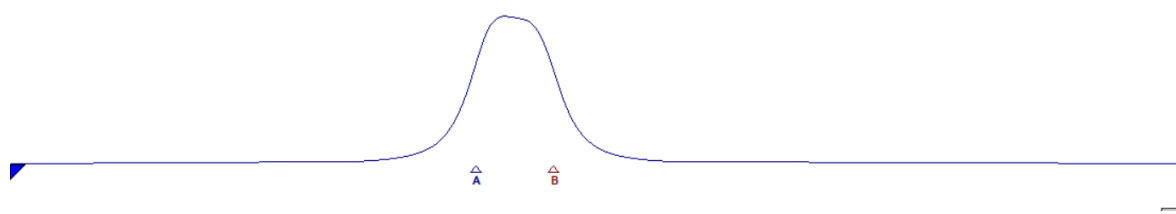

$k = 757 \text{ s}^{-1}$  (simulating the set 1 spectrum recorded at 293 K)

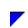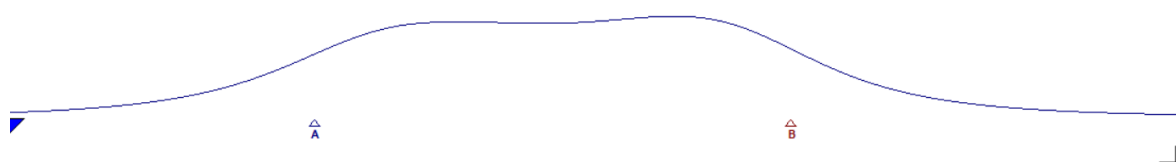

$k = 300 \text{ s}^{-1}$  (simulating the set 2 spectrum recorded at 293 K)

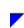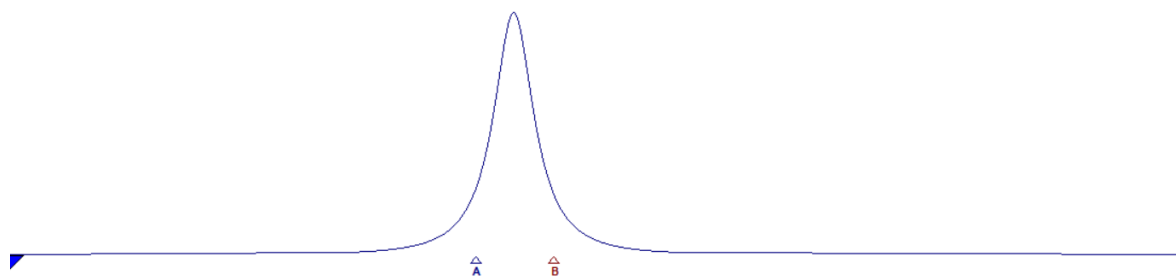

$k = 1000 \text{ s}^{-1}$  (simulating the set 1 spectrum recorded at 298 K)

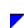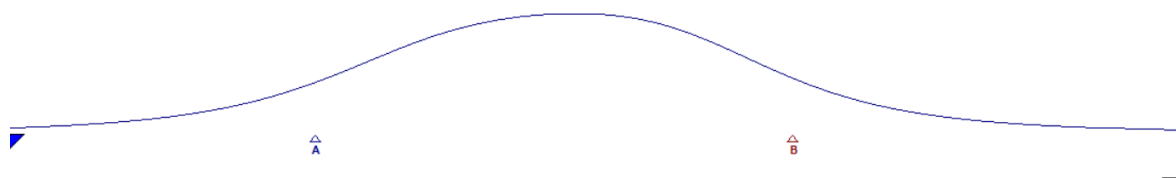

$k = 450 \text{ s}^{-1}$  (simulating the set 2 spectrum recorded at 298 K)

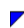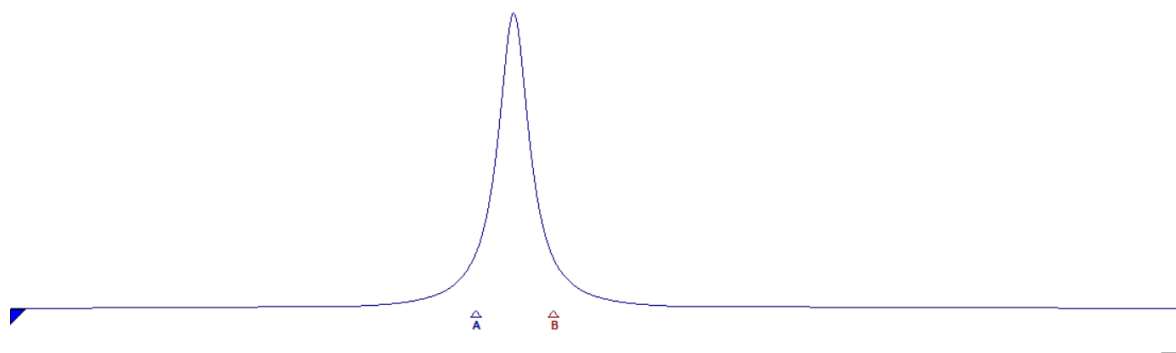

$k = 1500 \text{ s}^{-1}$  (simulating the set 1 spectrum recorded at 303 K)

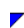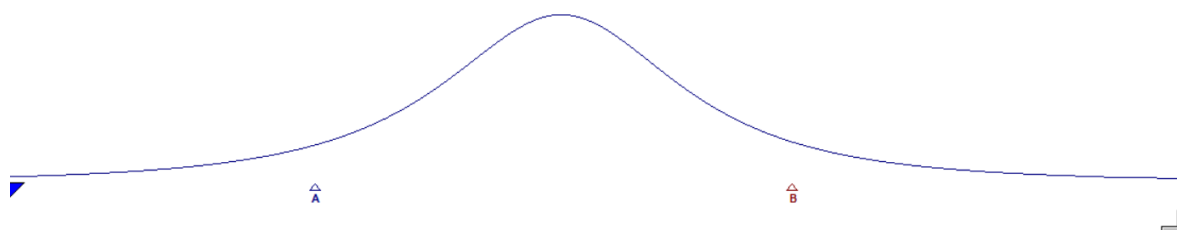

$k = 650 \text{ s}^{-1}$  (simulating the set 2 spectrum recorded at 303 K)

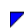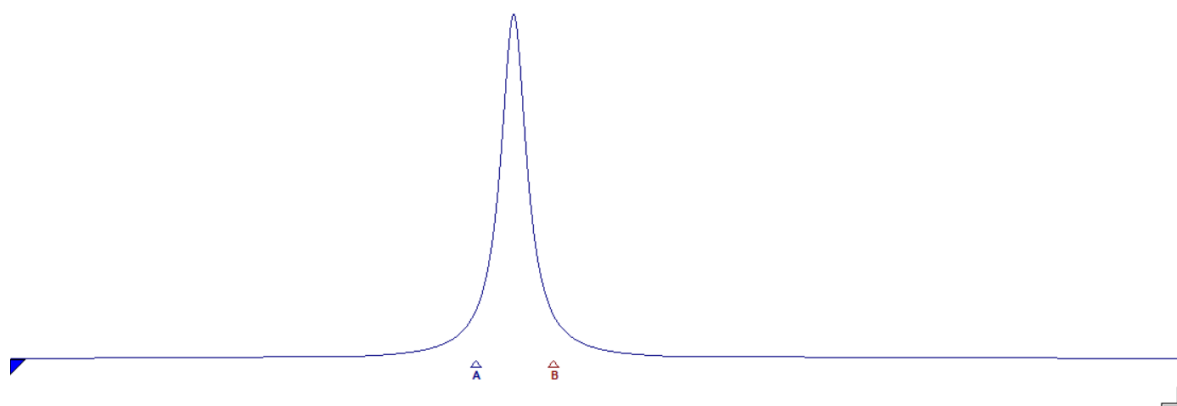

$k = 3000 \text{ s}^{-1}$  (simulating the set 1 spectrum recorded at 313 K)

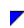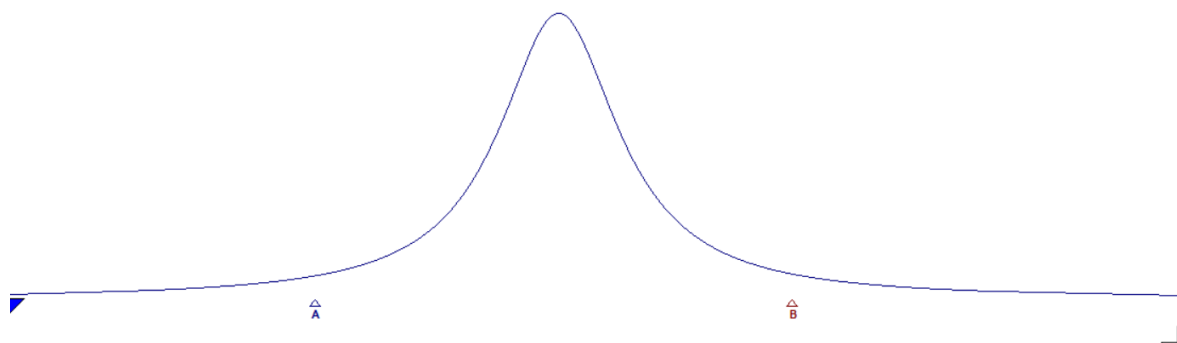



$k = 1400 \text{ s}^{-1}$  (simulating the set 2 spectrum recorded at 313 K)

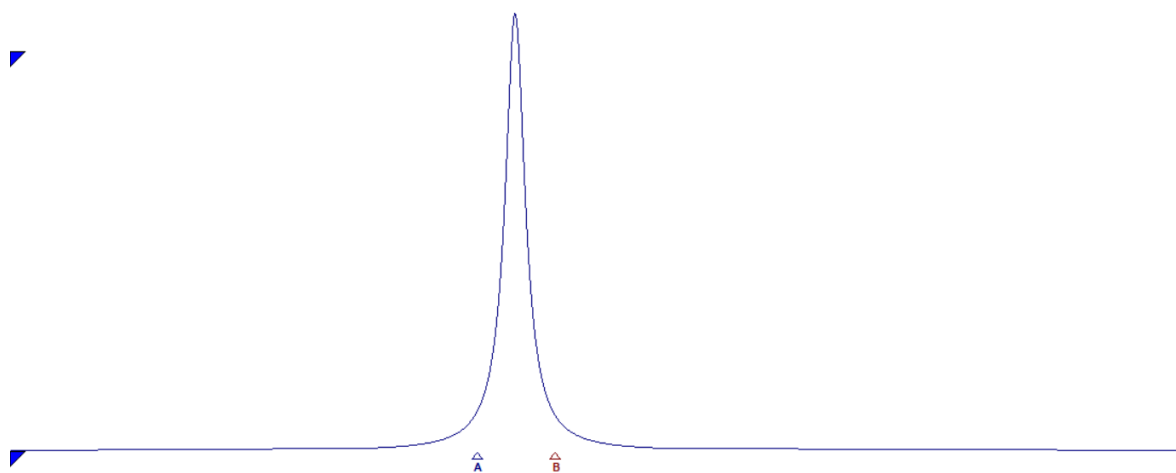

$k = 6000 \text{ s}^{-1}$  (simulating the set 1 spectrum recorded at 323 K)

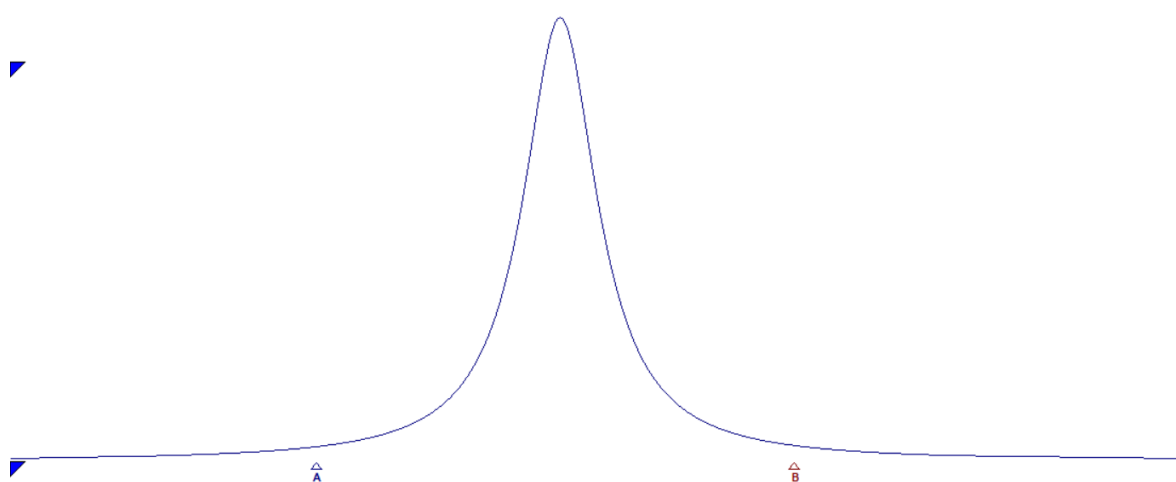

$k = 3000 \text{ s}^{-1}$  (simulating the set 2 spectrum recorded at 323 K)

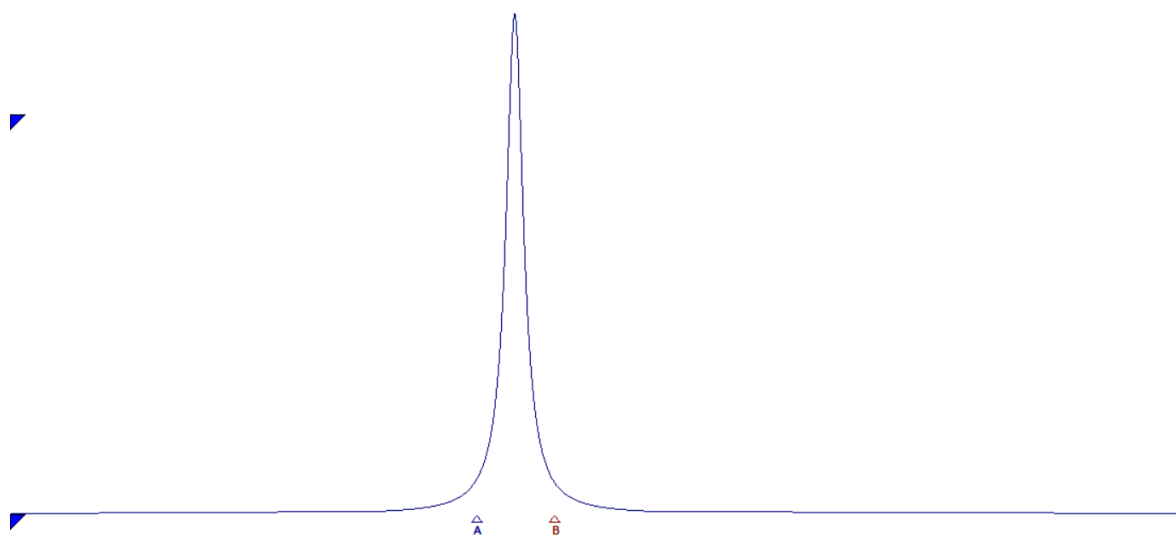

$k = 9000 \text{ s}^{-1}$  (simulating the set 1 spectrum recorded at 328 K)

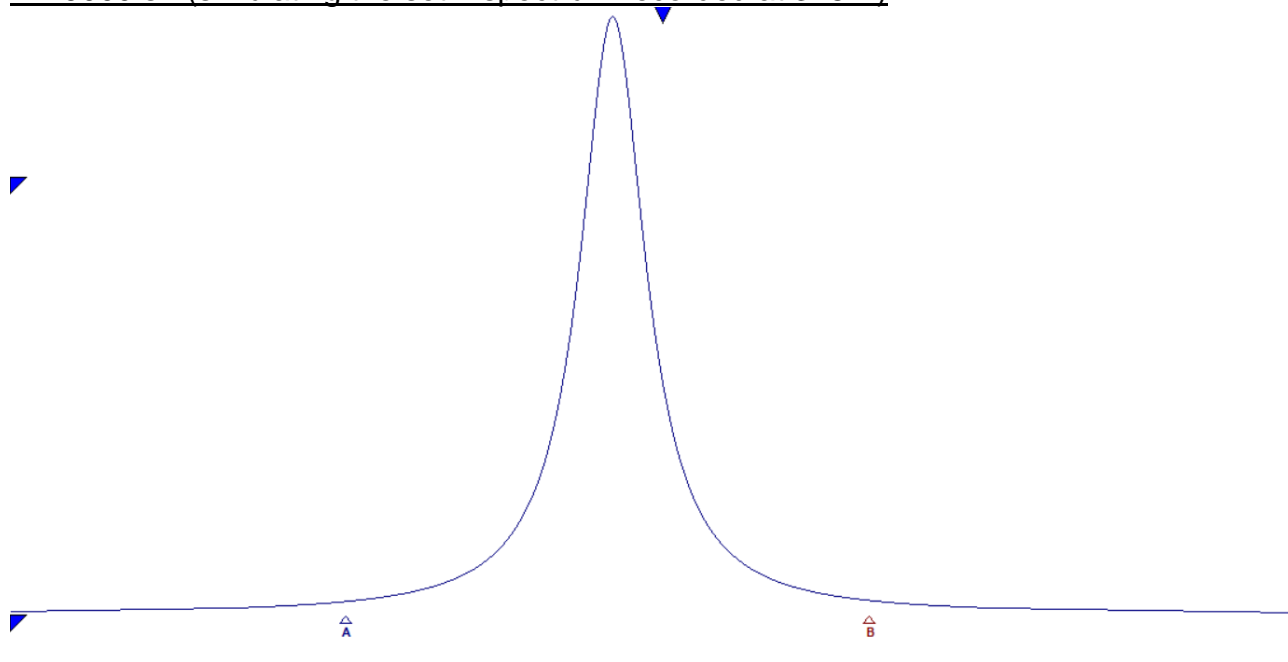

$k = 4300 \text{ s}^{-1}$  (simulating the set 2 spectrum recorded at 328 K)

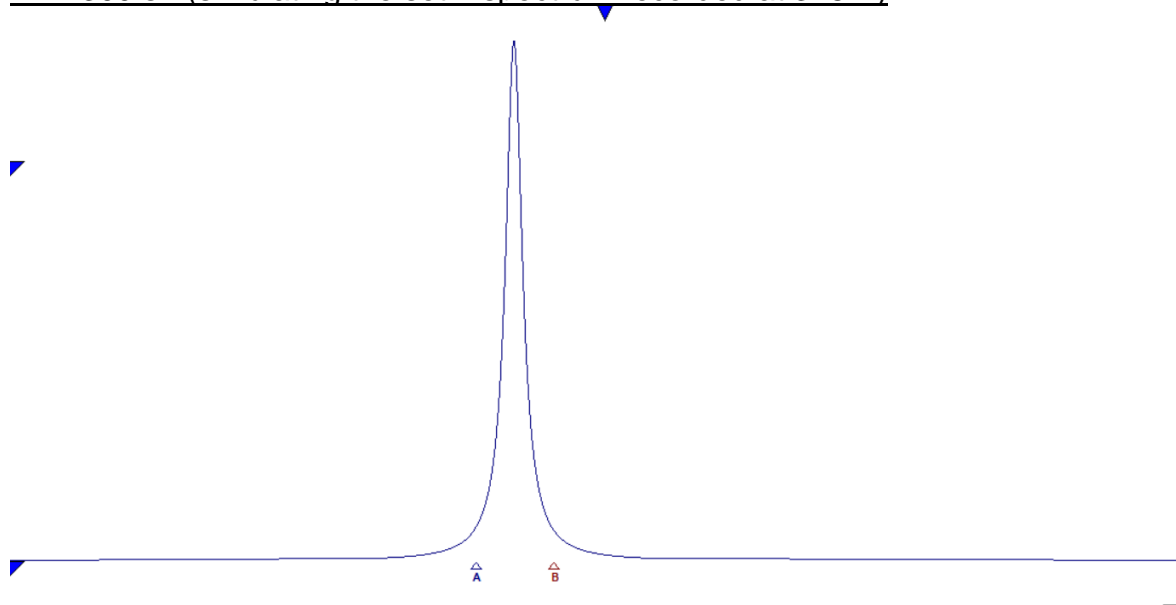

Plots of  $\ln(k.T^{-1})$  versus  $T^{-1}$  based on these simulated rate constants are given below and application of equations 3 and 4 allowed  $\Delta H^\ddagger$  and  $\Delta S^\ddagger$  to be determined as  $59.0 \pm 3.2 \text{ kJ mol}^{-1}$  and  $0.0 \pm 0.1 \text{ J mol}^{-1}\text{K}^{-1}$ .

Plot based on set 1

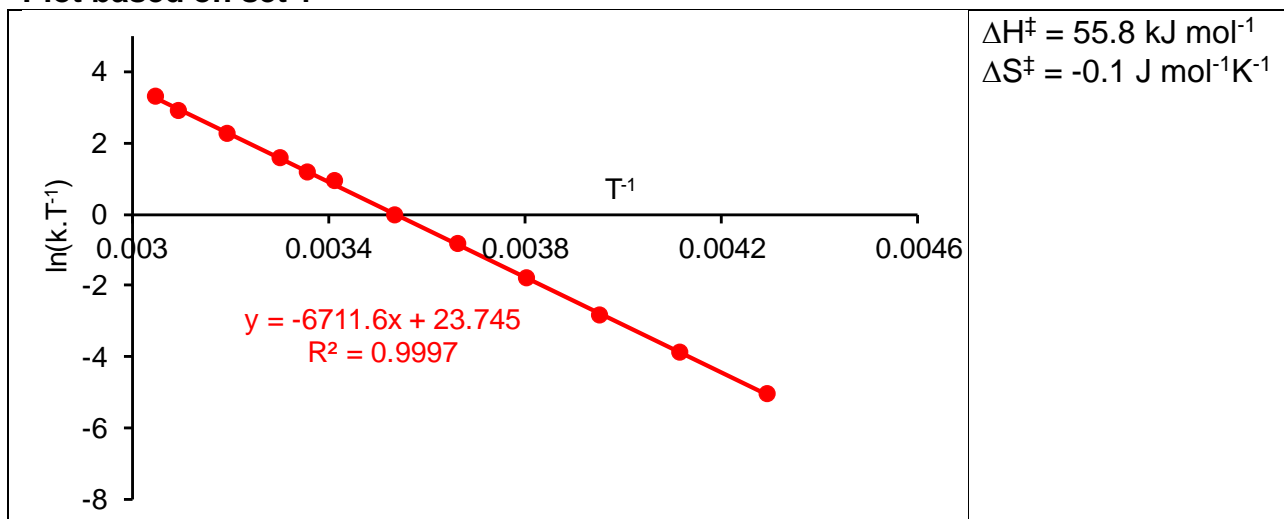

Plot based on set 2

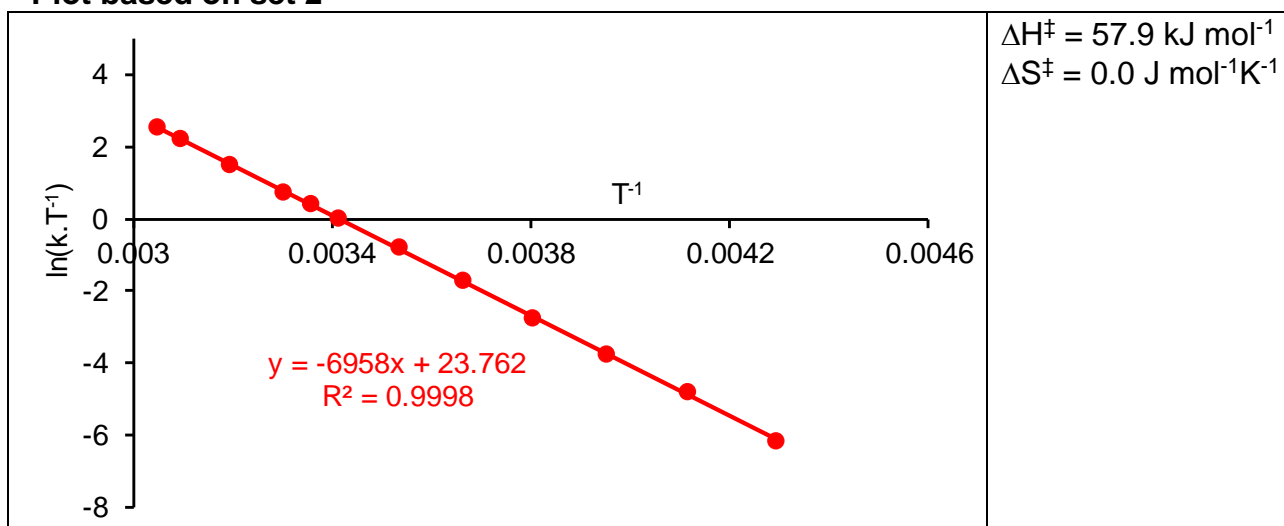

## Compound 8

The parameters used were:

| Peak (as labelled in the VT spectra in the ESI) | Frequency (Hz) | Half width (Hz) | % intensity |
|-------------------------------------------------|----------------|-----------------|-------------|
| a: imine                                        | 4270.4         | 10.1            | 50.0        |
| b: imine                                        | 4174.2         | 8.8             | 50.0        |
| c: aromatic set 1                               | 3814.7         | 9.1             | 50.0        |
| d: aromatic set 1                               | 3803.4         | 9.1             | 50.0        |
| e: aromatic set 2                               | 3636.1         | 8.9             | 50.0        |
| f: aromatic set 2                               | 3586.2         | 8.9             | 50.0        |

The imines, aromatic set 1 and aromatic set 2 were simulated separately, each as a two spin uncoupled system. The actual peak line shapes at each temperature were then best simulated by simulations with the following rate constants for the exchange process and this allowed  $\Delta G^\ddagger$  at each temperature to be calculated using equation 1. The average value of these 30 calculations of  $\Delta G^\ddagger$  is  $49.0 \text{ kJ mol}^{-1}$  and all the values are within  $\pm 1.0 \text{ kJ mol}^{-1}$  of this average.

| Temperature (K) | imines               |                                             | aromatic set 1       |                                             | aromatic set 2       |                                             |
|-----------------|----------------------|---------------------------------------------|----------------------|---------------------------------------------|----------------------|---------------------------------------------|
|                 | k (s <sup>-1</sup> ) | $\Delta G^\ddagger$ (kJ mol <sup>-1</sup> ) | k (s <sup>-1</sup> ) | $\Delta G^\ddagger$ (kJ mol <sup>-1</sup> ) | k (s <sup>-1</sup> ) | $\Delta G^\ddagger$ (kJ mol <sup>-1</sup> ) |
| 218             | 5                    | 49.9                                        | 10                   | 48.7                                        | 10                   | 48.7                                        |
| 223             | 10                   | 49.8                                        | 20                   | 48.5                                        | 20                   | 48.5                                        |
| 233             | 40                   | 49.4                                        | 50                   | 49.0                                        | 60                   | 48.7                                        |
| 243             | 120                  | 49.4                                        | 170                  | 48.7                                        | 190                  | 48.5                                        |
| 253             | 327                  | 49.4                                        | 500                  | 48.6                                        | 500                  | 48.6                                        |
| 263             | 650                  | 50.0                                        | 1300                 | 48.5                                        | 1200                 | 48.6                                        |
| 273             | 1600                 | 49.9                                        | 3000                 | 48.5                                        | 3000                 | 48.5                                        |
| 283             | 3500                 | 50.0                                        | 6000                 | 48.7                                        | 6000                 | 48.7                                        |
| 293             | 7500                 | 50.0                                        | 14000                | 48.5                                        | 14000                | 48.5                                        |
| 298             | 11000                | 49.9                                        | 19000                | 48.6                                        | 19000                | 48.6                                        |

The simulated spectra (all with the same vertical and horizontal scales) are given below:

$k = 5 \text{ s}^{-1}$  (simulating the imine spectrum recorded at 218 K)

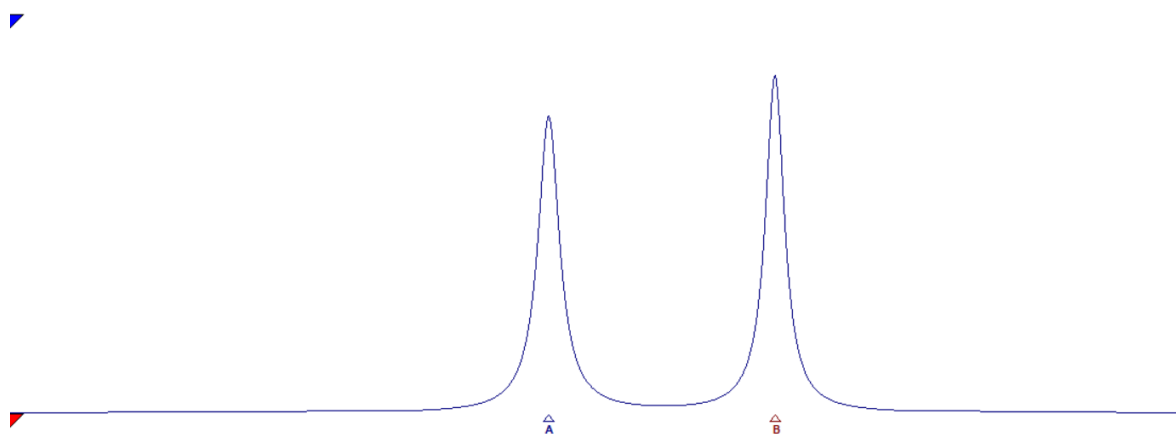

$k = 10 \text{ s}^{-1}$  (simulating the aromatic set 1 spectrum recorded at 218 K)

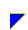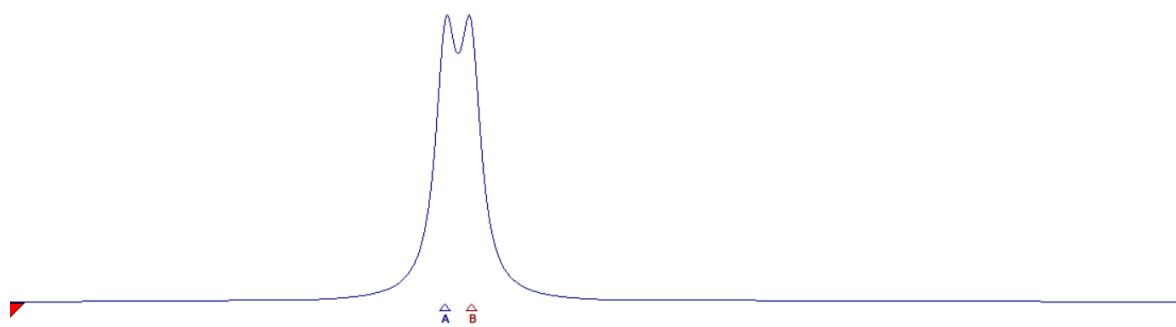

$k = 10 \text{ s}^{-1}$  (simulating the aromatic set 2 spectrum recorded at 218 K)

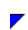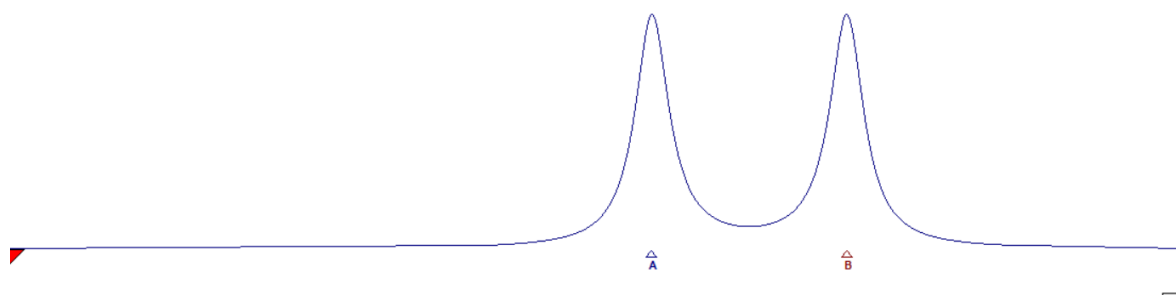

$k = 10 \text{ s}^{-1}$  (simulating the imine spectrum recorded at 223 K)

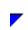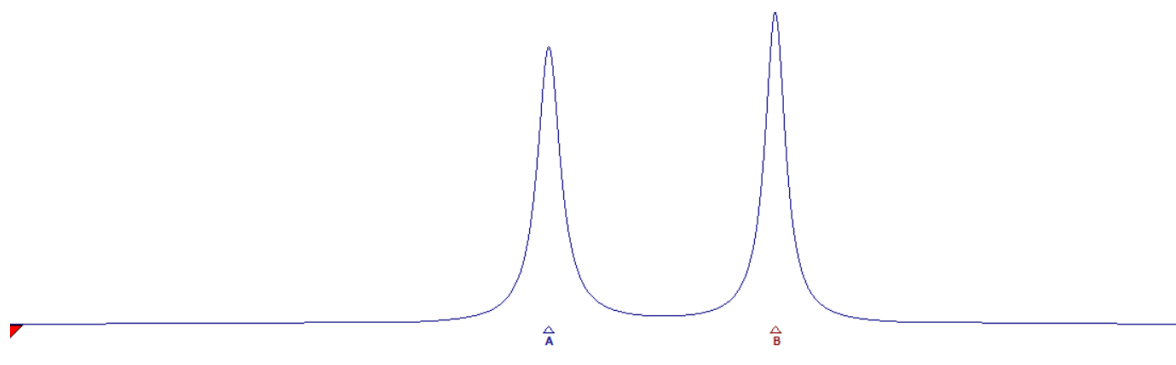

$k = 20 \text{ s}^{-1}$  (simulating the aromatic set 1 spectrum recorded at 223 K)

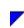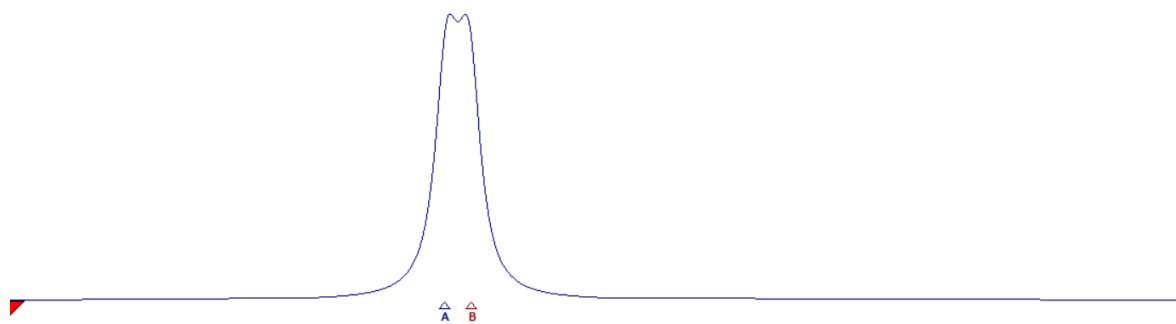

$k = 20 \text{ s}^{-1}$  (simulating the aromatic set 2 spectrum recorded at 223 K)

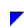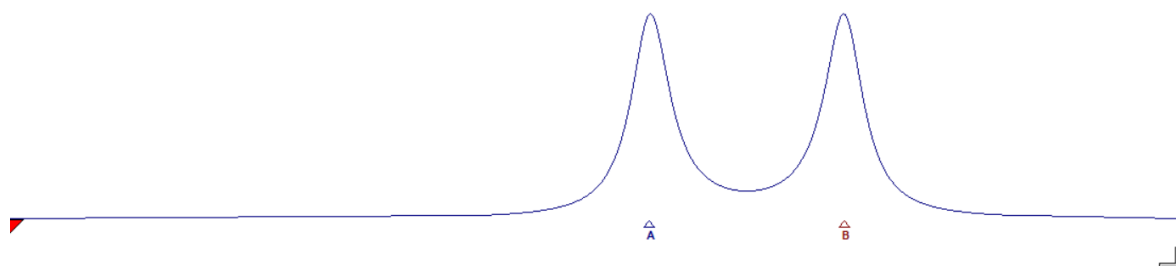

$k = 40 \text{ s}^{-1}$  (simulating the imine spectrum recorded at 233 K)

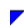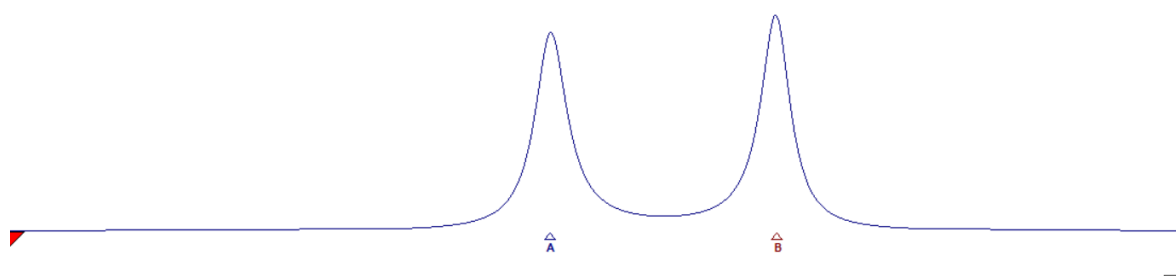

$k = 50 \text{ s}^{-1}$  (simulating the aromatic set 1 spectrum recorded at 233 K)

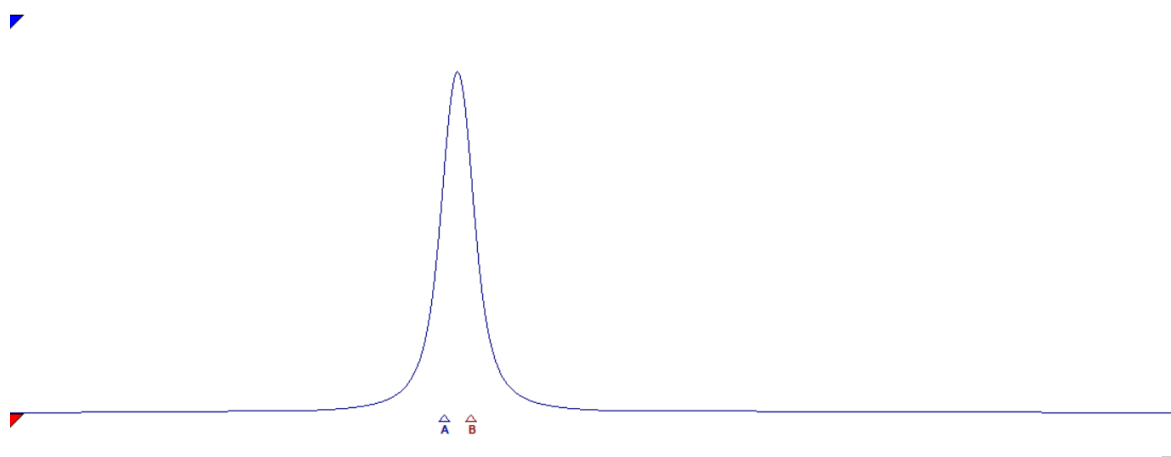

$k = 60 \text{ s}^{-1}$  (simulating the aromatic set 2 spectrum recorded at 233 K)

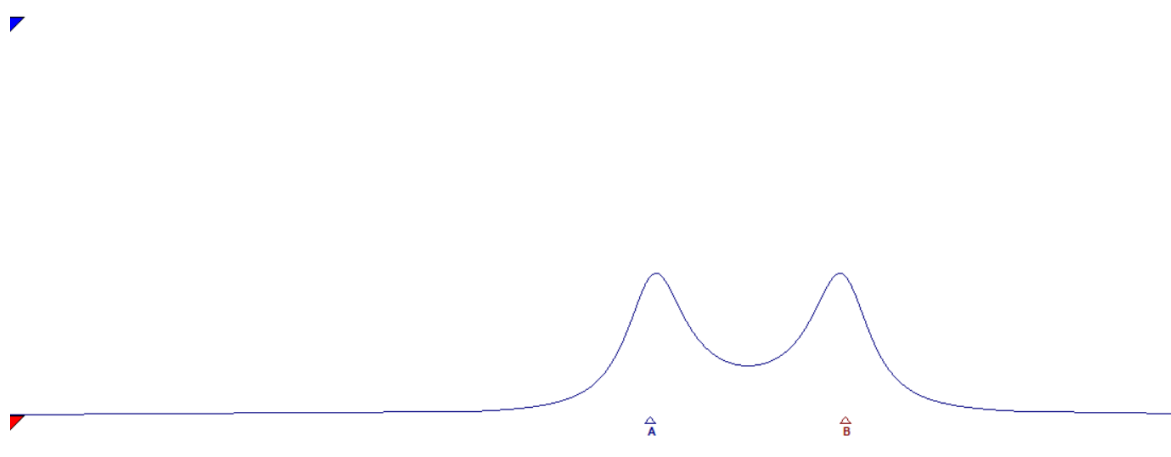

$k = 120 \text{ s}^{-1}$  (simulating the imine spectrum recorded at 243 K)

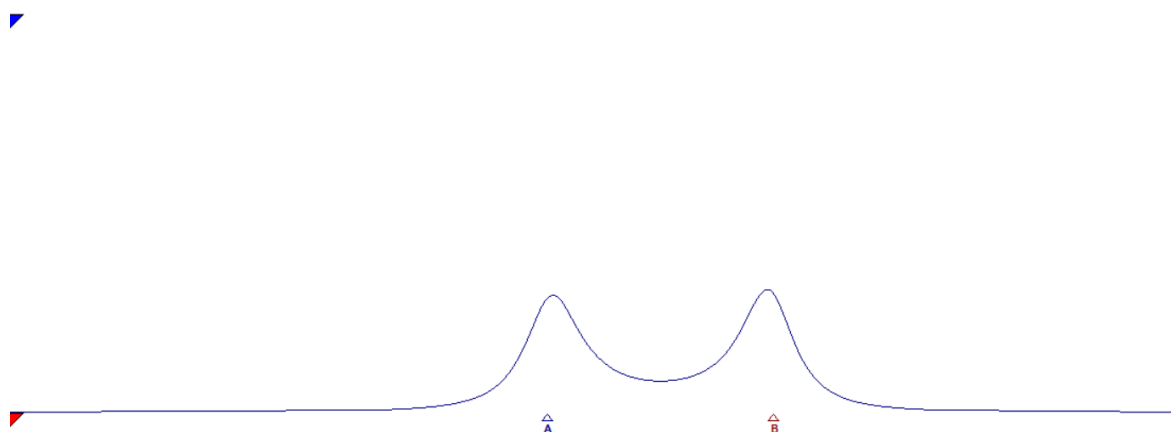

$k = 170 \text{ s}^{-1}$  (simulating the aromatic set 1 spectrum recorded at 243 K)

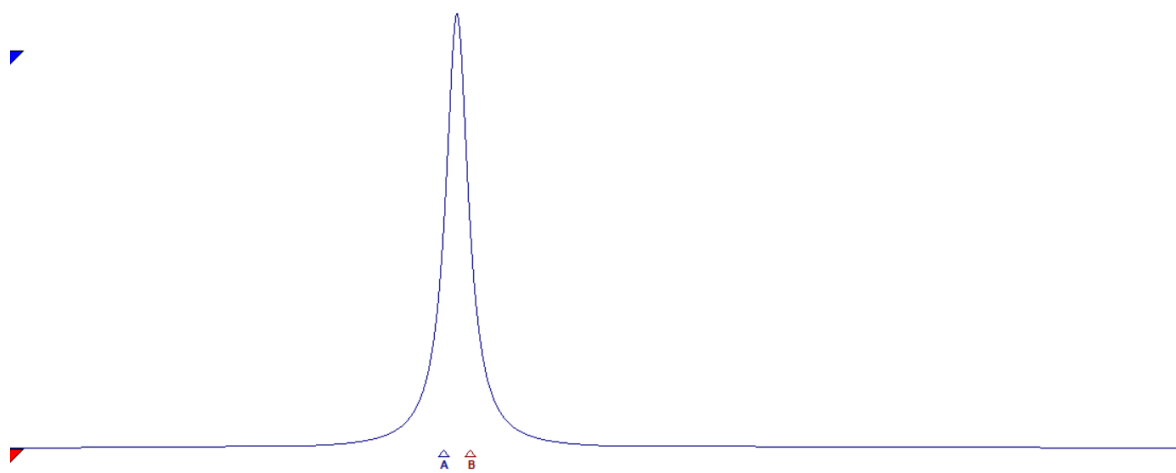

$k = 190 \text{ s}^{-1}$  (simulating the aromatic set 2 spectrum recorded at 243 K)

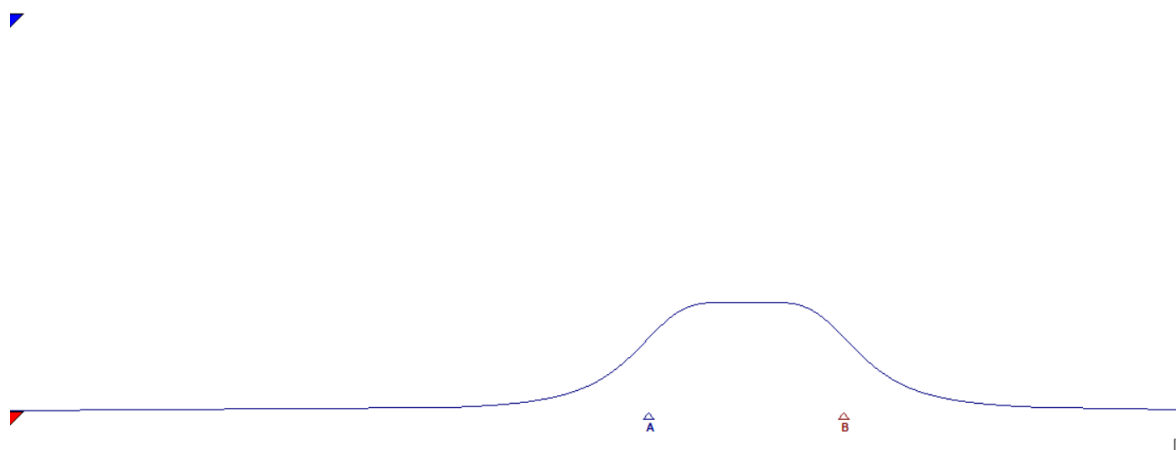

$k = 327 \text{ s}^{-1}$  (simulating the imine spectrum recorded at 253 K)

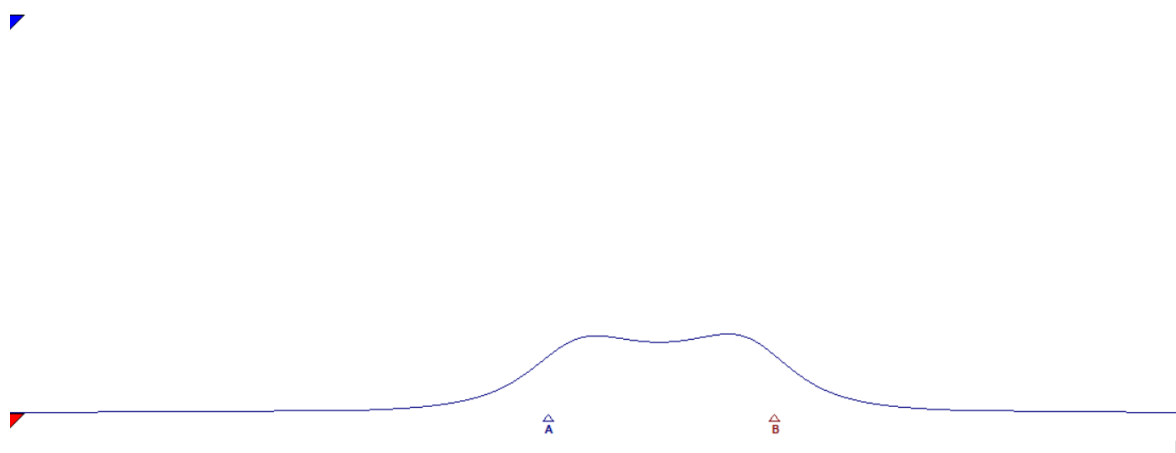



$k = 500 \text{ s}^{-1}$  (simulating the aromatic set 1 spectrum recorded at 253 K)

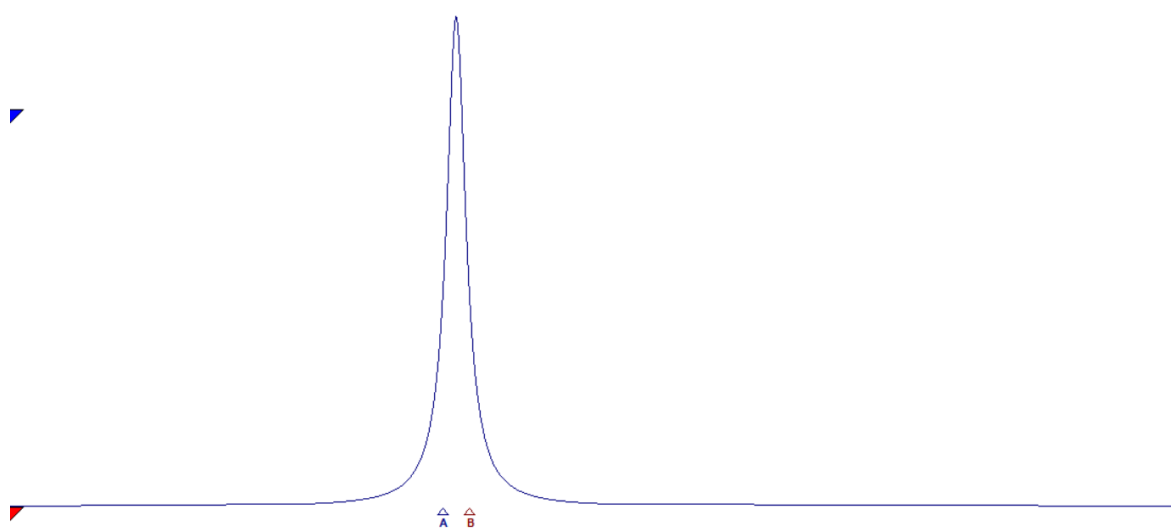

$k = 500 \text{ s}^{-1}$  (simulating the aromatic set 2 spectrum recorded at 253 K)

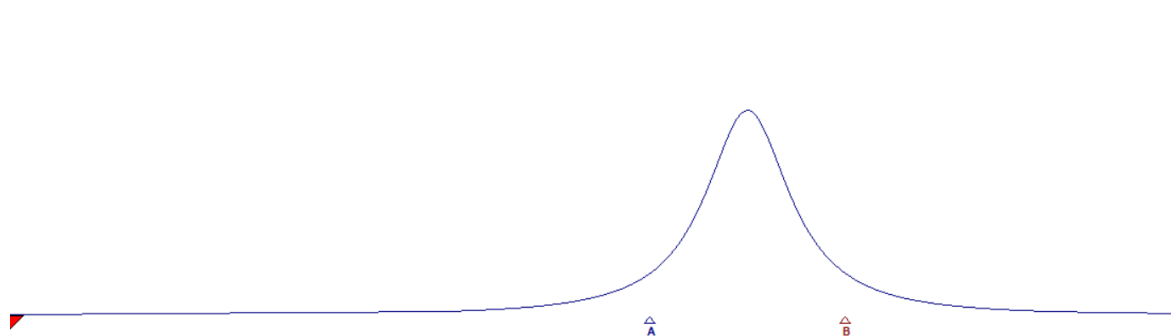

$k = 650 \text{ s}^{-1}$  (simulating the imine spectrum recorded at 263 K)

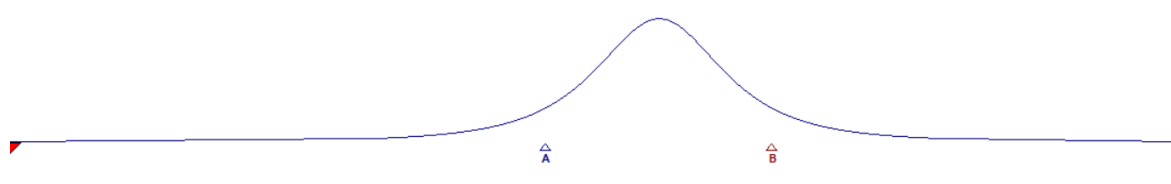

$k = 1300 \text{ s}^{-1}$  (simulating the aromatic set 1 spectrum recorded at 263 K)

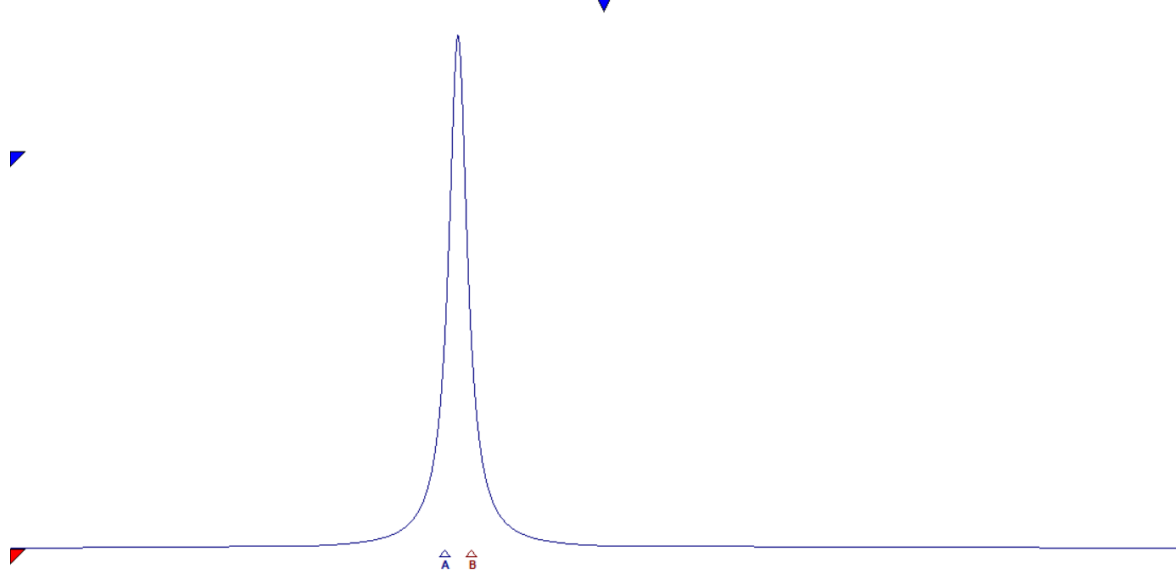

$k = 1200 \text{ s}^{-1}$  (simulating the aromatic set 2 spectrum recorded at 263 K)

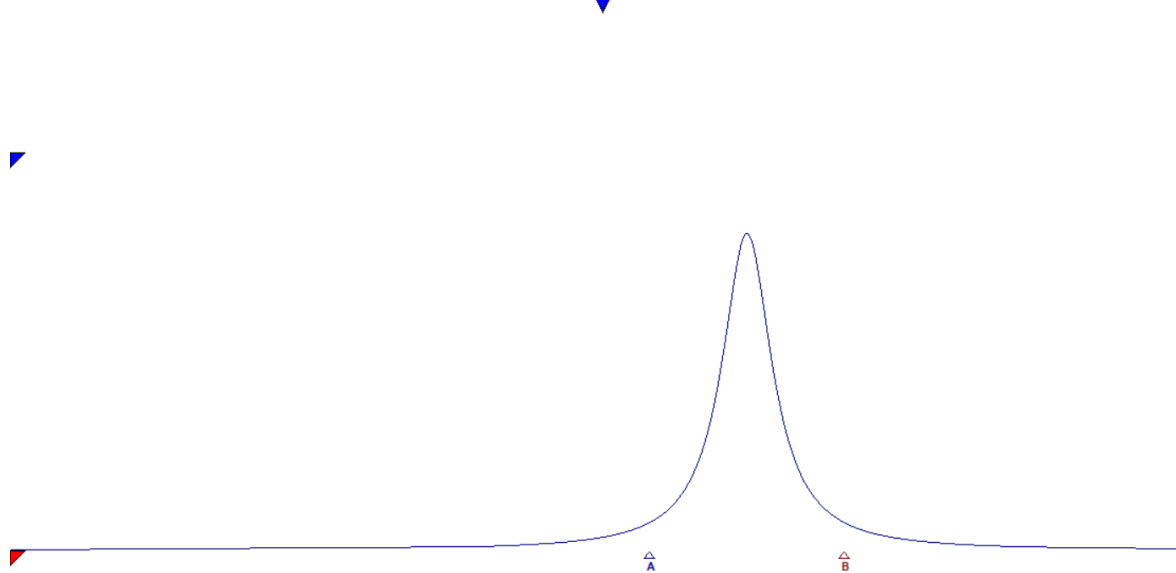

$k = 1600 \text{ s}^{-1}$  (simulating the imine spectrum recorded at 273 K)

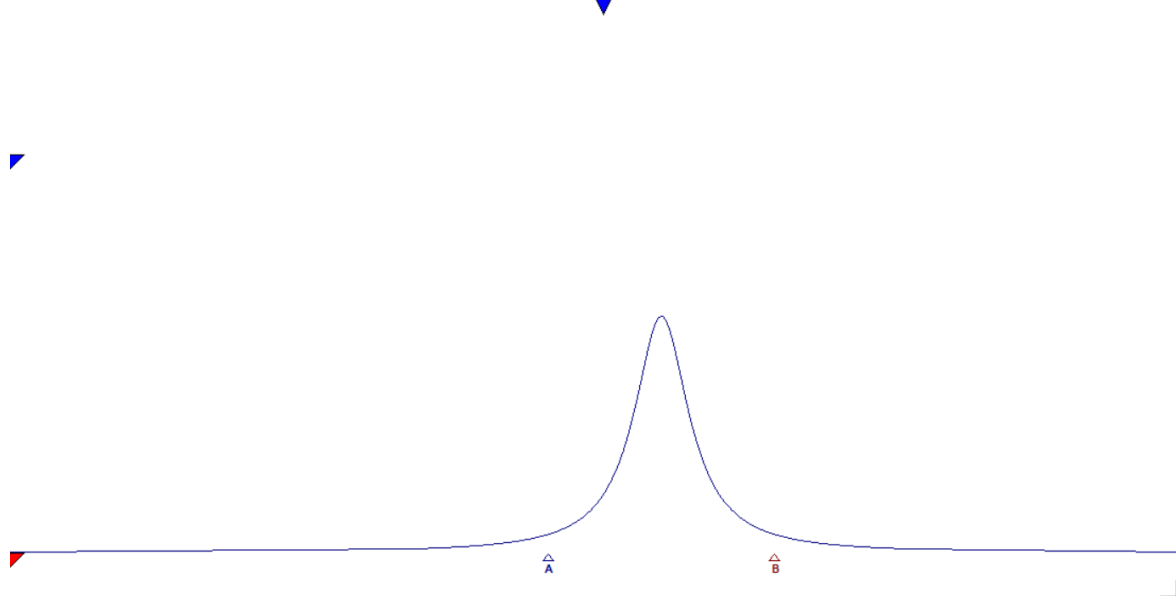

$k = 3000 \text{ s}^{-1}$  (simulating the aromatic set 1 spectrum recorded at 273 K)

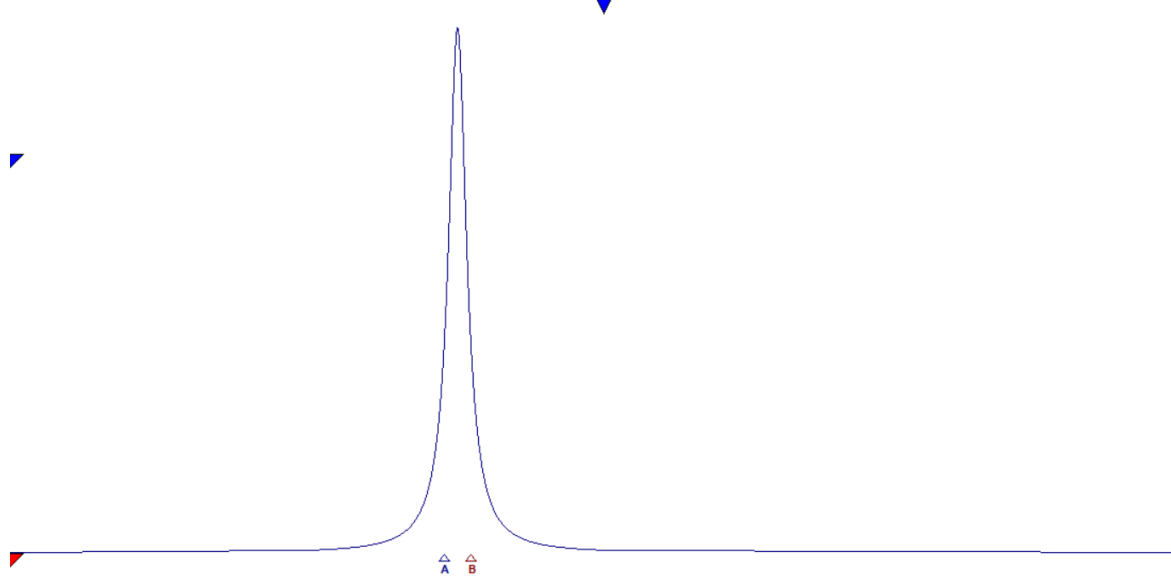

$k = 3000 \text{ s}^{-1}$  (simulating the aromatic set 2 spectrum recorded at 273 K)

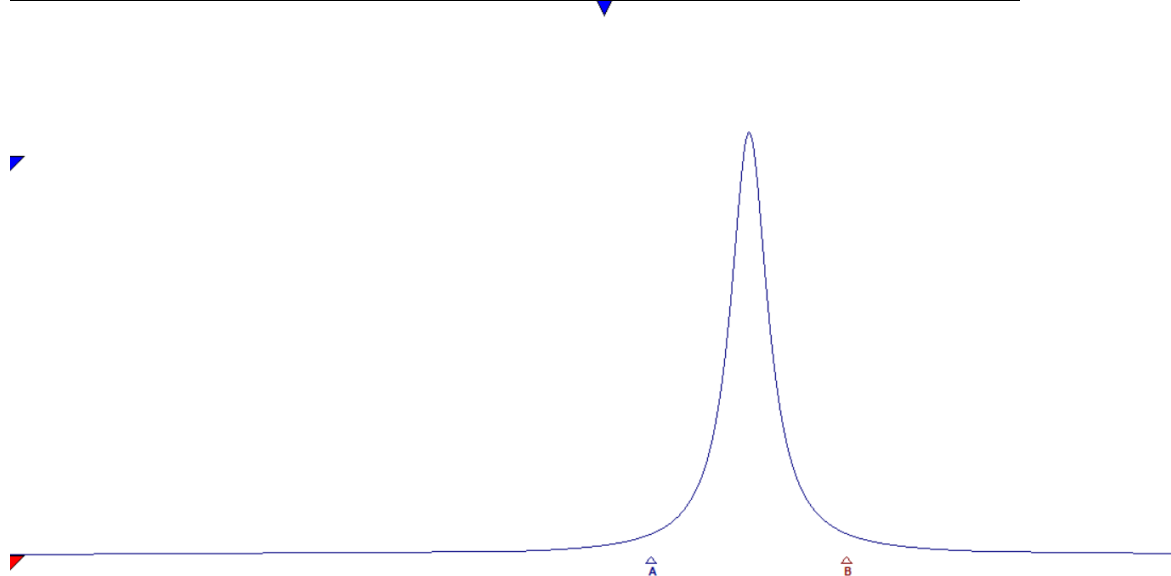

$k = 3500 \text{ s}^{-1}$  (simulating the imine spectrum recorded at 283 K)

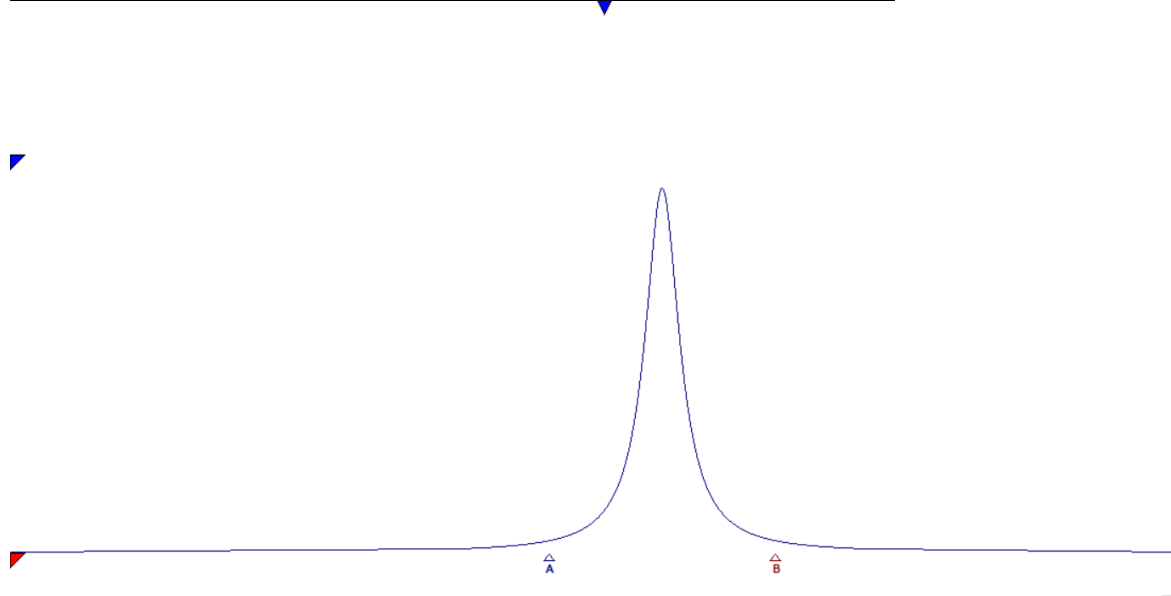

$k = 6000 \text{ s}^{-1}$  (simulating the aromatic set 1 spectrum recorded at 283 K)

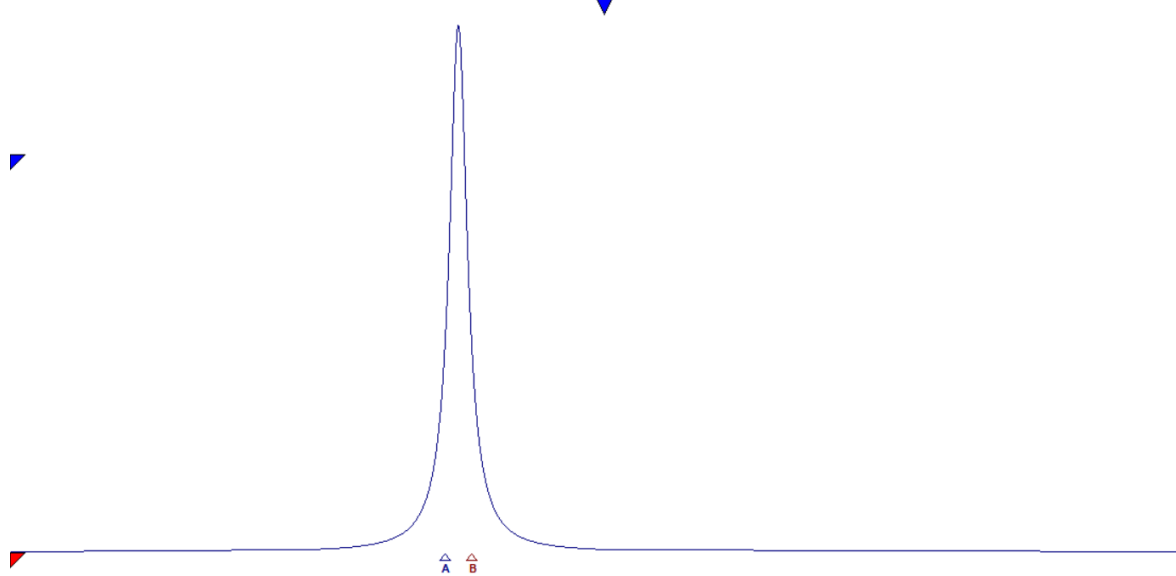

$k = 6000 \text{ s}^{-1}$  (simulating the aromatic set 2 spectrum recorded at 283 K)

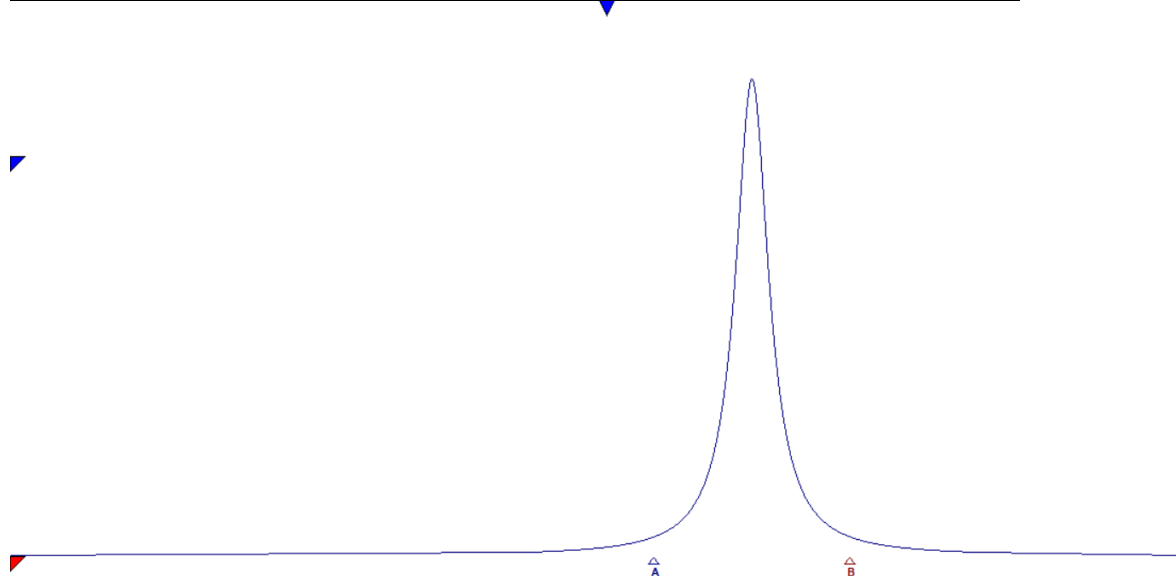

$k = 7500 \text{ s}^{-1}$  (simulating the imine spectrum recorded at 293 K)

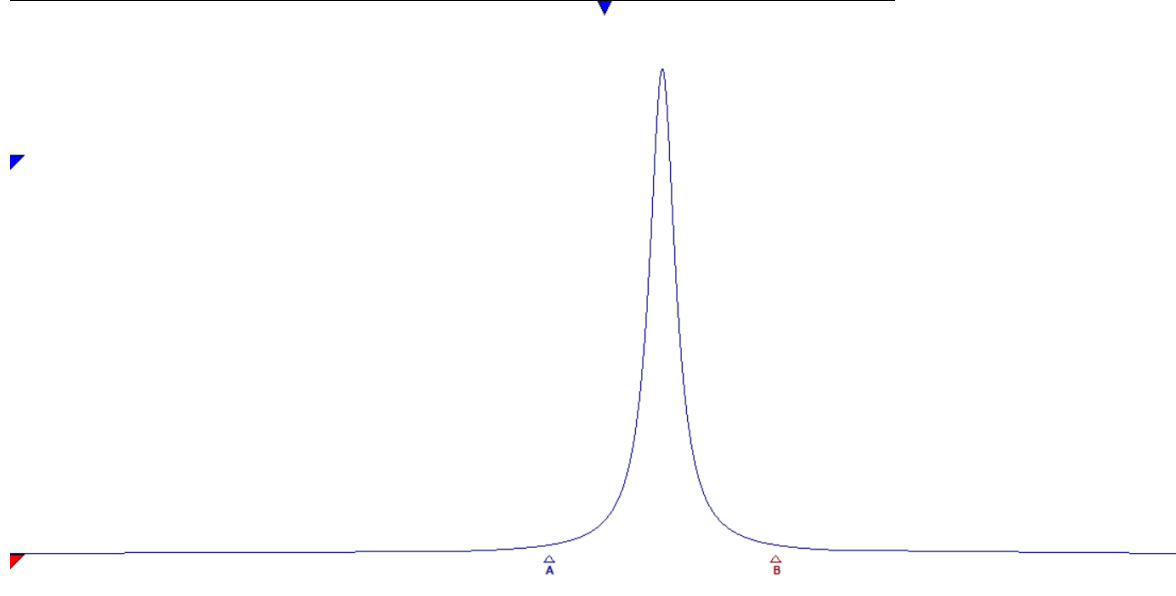

$k = 14000 \text{ s}^{-1}$  (simulating the aromatic set 1 spectrum recorded at 293 K)

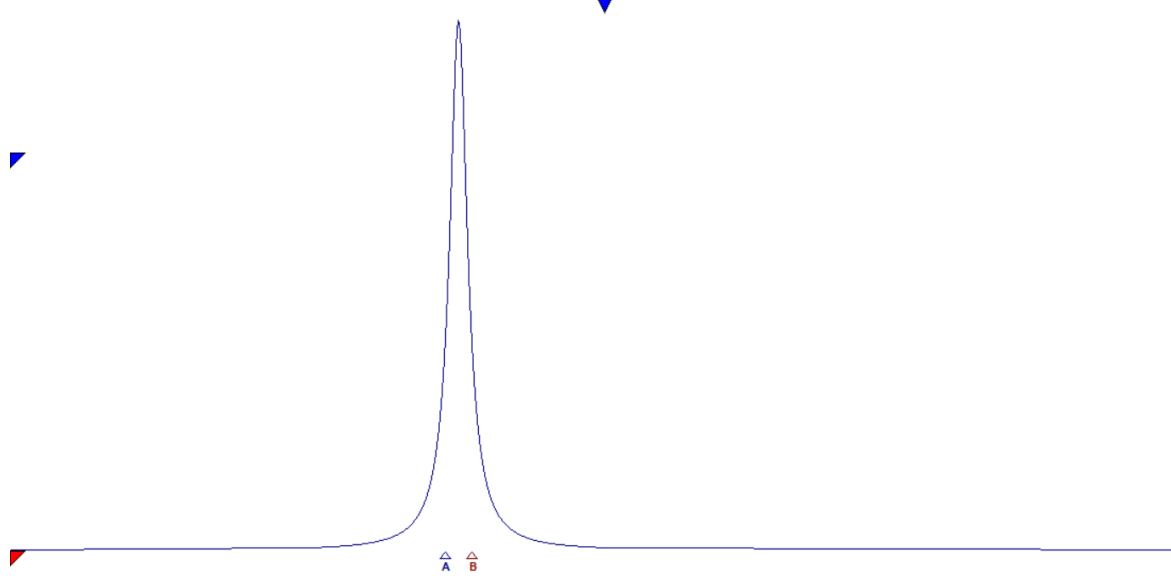

$k = 14000 \text{ s}^{-1}$  (simulating the aromatic set 2 spectrum recorded at 293 K)

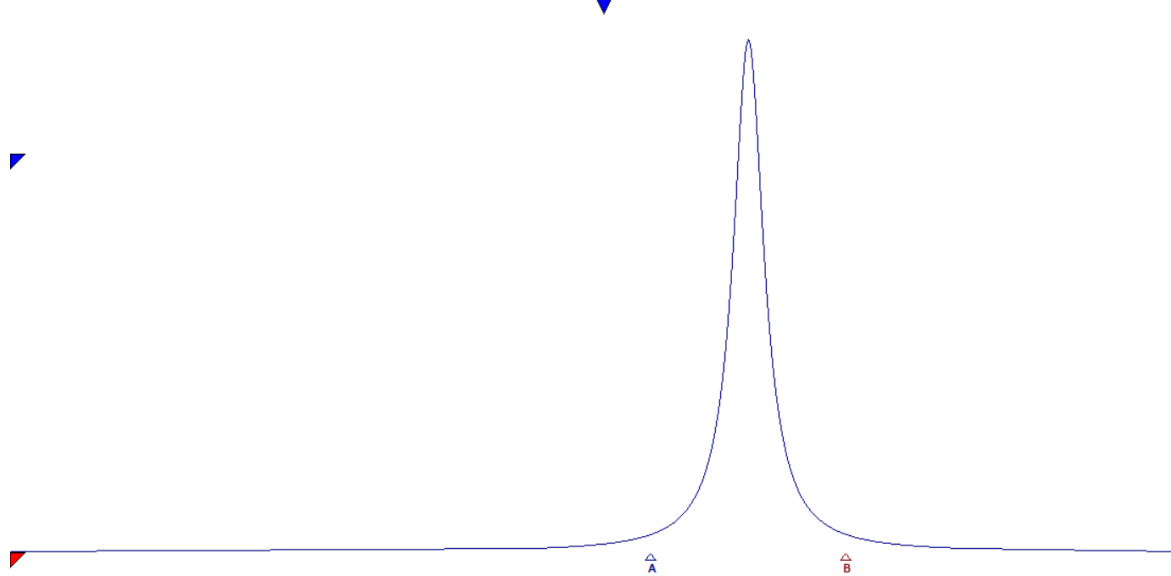

$k = 11000 \text{ s}^{-1}$  (simulating the imine spectrum recorded at 298 K)

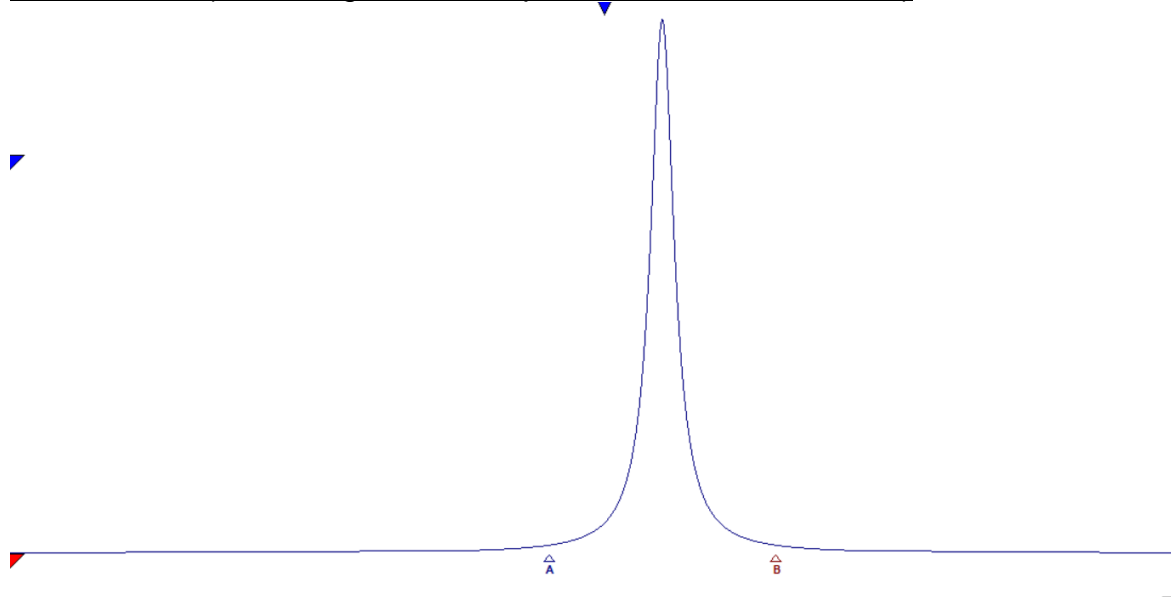

$k = 19000 \text{ s}^{-1}$  (simulating the aromatic set 1 spectrum recorded at 298 K)

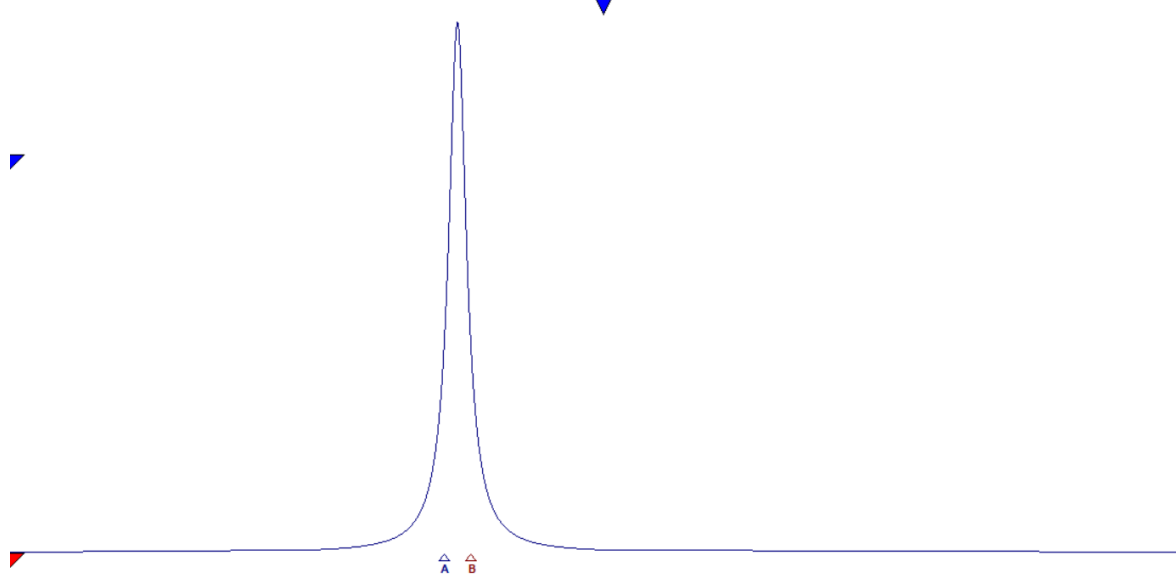

$k = 19000 \text{ s}^{-1}$  (simulating the aromatic set 2 spectrum recorded at 298 K)

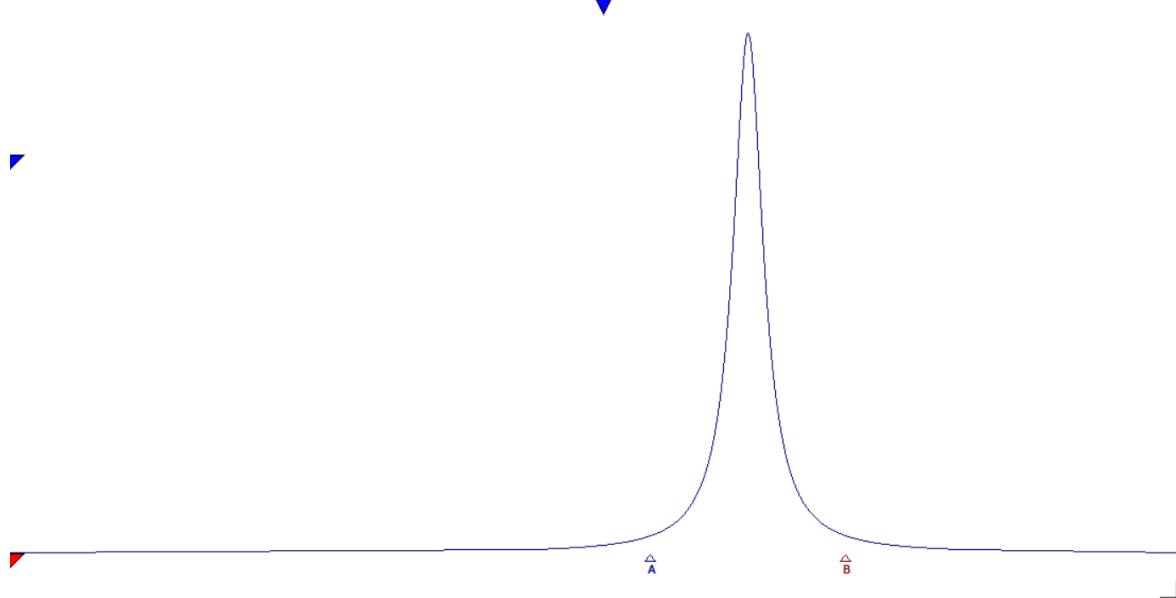

Plots of  $\ln(k.T^{-1})$  versus  $T^{-1}$  based on these simulated rate constants are given below and application of equations 3 and 4 allowed  $\Delta H^\ddagger$  and  $\Delta S^\ddagger$  to be determined as  $48.9 \pm 0.3 \text{ kJ mol}^{-1}$  and  $-0.2 \pm 3.2 \text{ J mol}^{-1}\text{K}^{-1}$ .

#### Plot based on imines

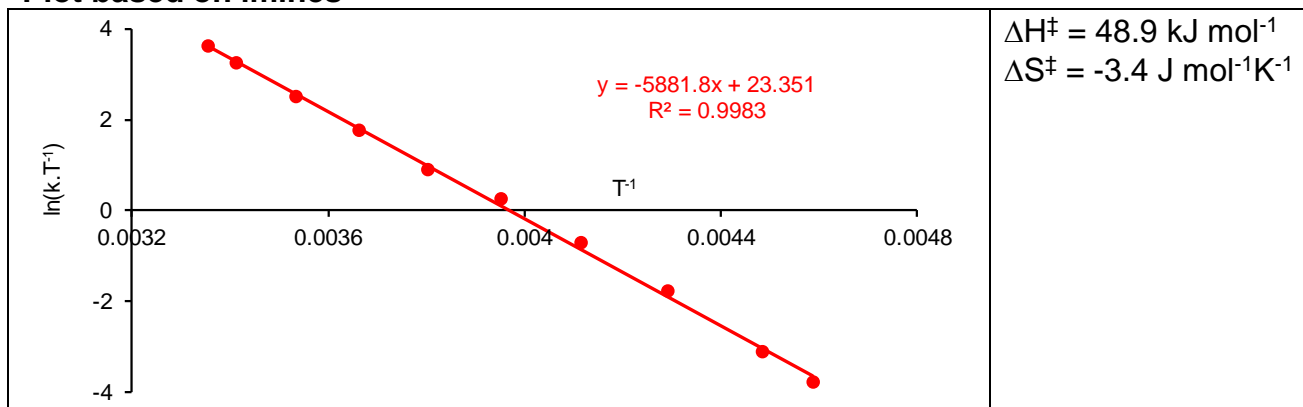

#### Plot based on aromatic set 1

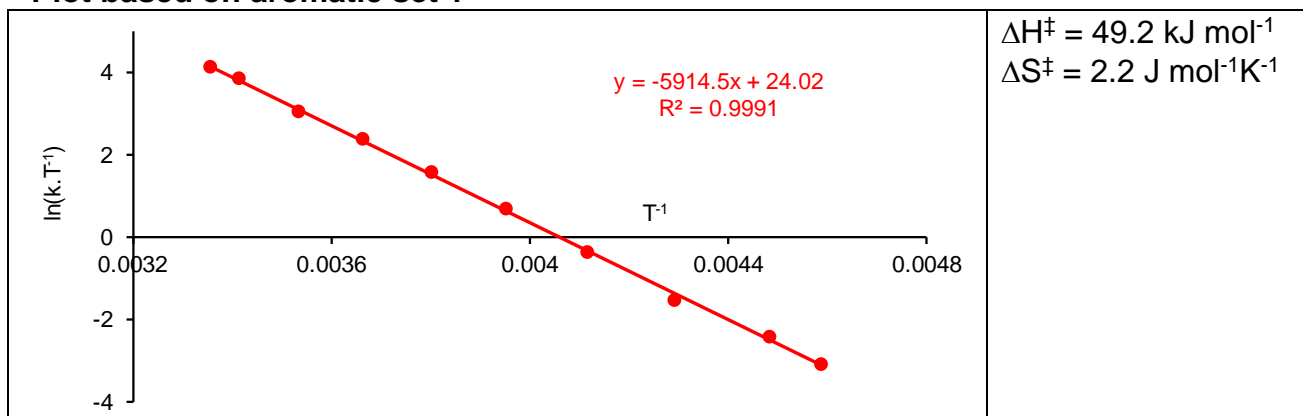

#### Plot based on aromatic set 2

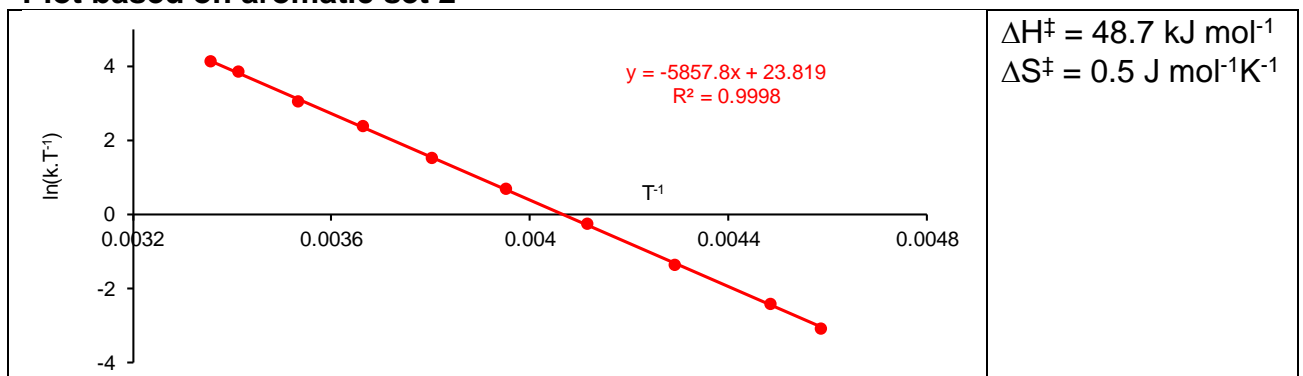

## 1:2.5 mixture of 10 and 11

The parameters used were:

| Peak (as labelled in Figure 11) | Frequency (Hz) | Half width (Hz) | % intensity |
|---------------------------------|----------------|-----------------|-------------|
| a                               | 759.45         | 2.97            | 23.0        |
| b                               | 750.64         | 2.97            | 21.4        |
| c                               | 709.22         | 2.97            | 29.3        |
| e                               | 661.1          | 2.97            | 23.5        |
| f                               | 644.3          | 2.97            | 23.1        |
| g                               | 635.1          | 2.97            | 18.7        |
| h                               | 614.1          | 2.97            | 34.7        |
| d                               | 481.32         | 2.97            | 26.3        |

The actual peak line shapes at each temperature were then best simulated by simulations with the following rate constants for the exchange process. Peaks a-d and e-h were simulated separately. This allowed  $\Delta G^\ddagger$  at each temperature to be calculated using equation 1. The values for  $\Delta G^\ddagger$  obtained using both data sets were then averaged. For this system, the average  $\Delta G^\ddagger$  values increases steadily from 51.8 kJ mol<sup>-1</sup> at 218 K to 68.6 kJ mol<sup>-1</sup> at 328 K.

| Temperature (K) | Analysis of peaks a–d |                                             | Analysis of peaks e–h |                                             | $\Delta G^\ddagger_{\text{avg}}$ (kJ mol <sup>-1</sup> ) |
|-----------------|-----------------------|---------------------------------------------|-----------------------|---------------------------------------------|----------------------------------------------------------|
|                 | k (s <sup>-1</sup> )  | $\Delta G^\ddagger$ (kJ mol <sup>-1</sup> ) | k (s <sup>-1</sup> )  | $\Delta G^\ddagger$ (kJ mol <sup>-1</sup> ) |                                                          |
| 218             | 3.2                   | 50.7                                        | 1                     | 52.8                                        | 51.8                                                     |
| 223             | 4                     | 51.5                                        | 1.4                   | 53.5                                        | 52.5                                                     |
| 233             | 6.8                   | 52.9                                        | 2.8                   | 54.6                                        | 53.8                                                     |
| 243             | 8.8                   | 54.7                                        | 4.4                   | 56.1                                        | 55.4                                                     |
| 253             | 13                    | 56.2                                        | 6                     | 57.9                                        | 57.1                                                     |
| 263             | 18                    | 57.8                                        | 9.1                   | 59.3                                        | 58.6                                                     |
| 273             | 25                    | 59.4                                        | 12.2                  | 61.0                                        | 60.2                                                     |
| 283             | 34.3                  | 60.9                                        | 15.9                  | 62.7                                        | 61.8                                                     |
| 293             | 40.1                  | 62.7                                        | 18.5                  | 64.6                                        | 63.7                                                     |
| 298             | 48.1                  | 63.4                                        | 25.7                  | 64.9                                        | 64.2                                                     |
| 303             | 55.4                  | 64.1                                        | 29.3                  | 65.7                                        | 64.9                                                     |
| 313             | 77.4                  | 65.5                                        | 41                    | 67.1                                        | 66.3                                                     |
| 323             | 104.4                 | 66.8                                        | 52.6                  | 68.7                                        | 67.8                                                     |
| 328             | 117.4                 | 67.6                                        | 58.8                  | 69.5                                        | 68.6                                                     |

The simulated spectra (all with the same vertical and horizontal scales) are given below:



Peaks a-d:  $k = 3.2 \text{ s}^{-1}$  (simulating the spectrum recorded at 218 K)

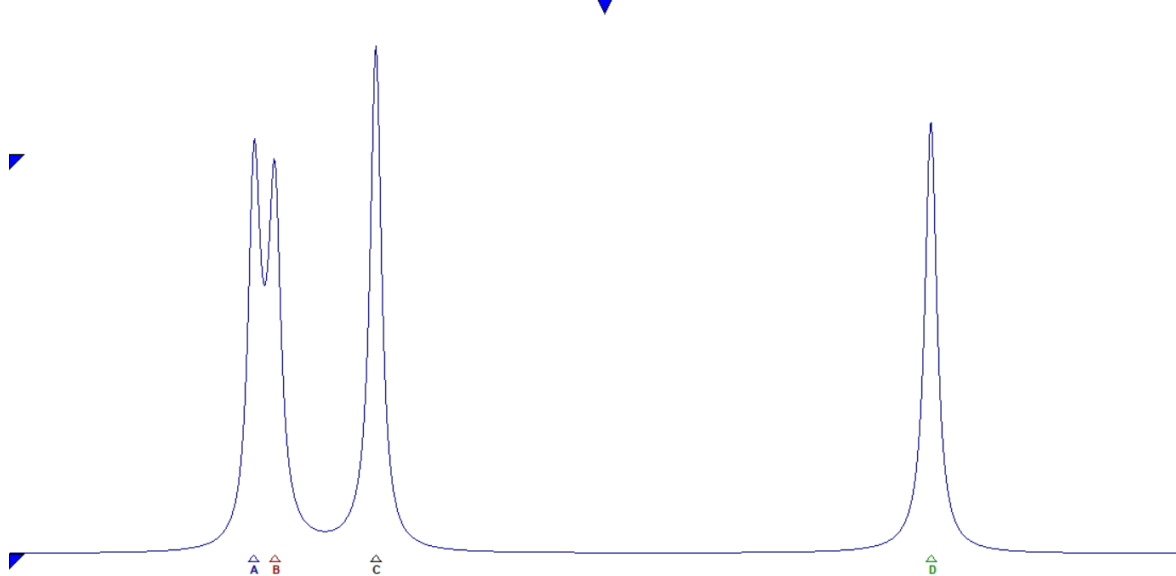

Peaks e-h:  $k = 1.0 \text{ s}^{-1}$  (simulating the spectrum recorded at 218 K)

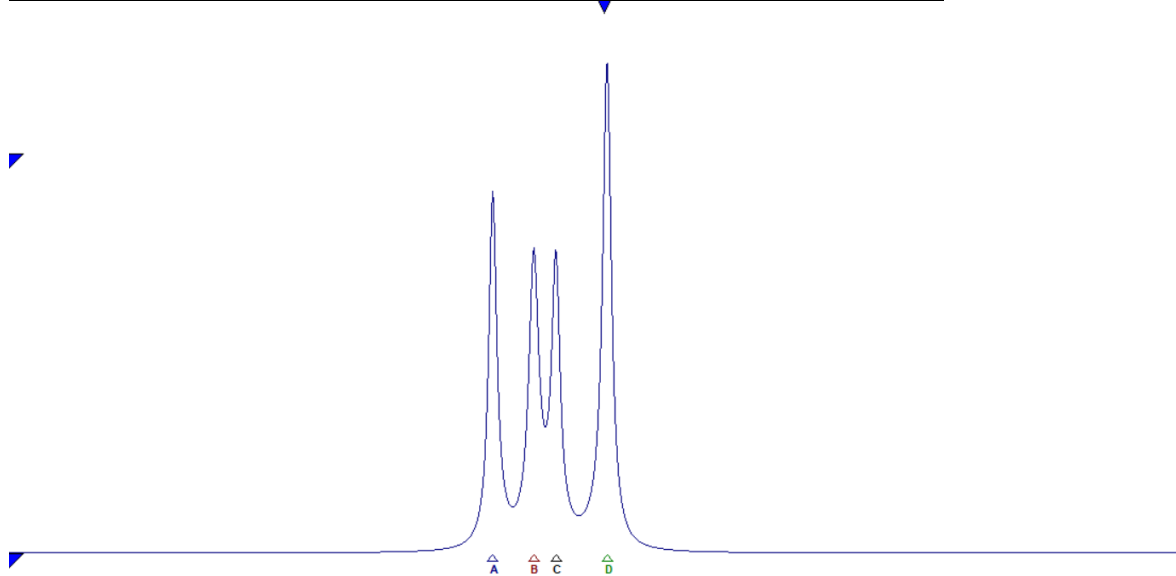

Peaks a-d:  $k = 4.0 \text{ s}^{-1}$  (simulating the spectrum recorded at 223 K)

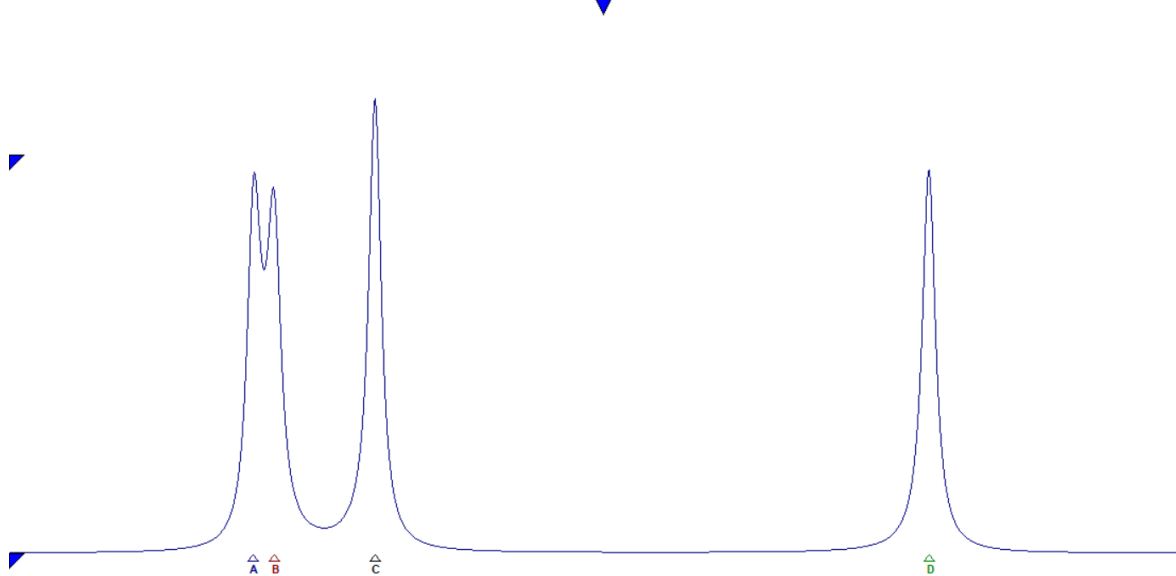

Peaks e-h:  $k = 1.4 \text{ s}^{-1}$  (simulating the spectrum recorded at 223 K)

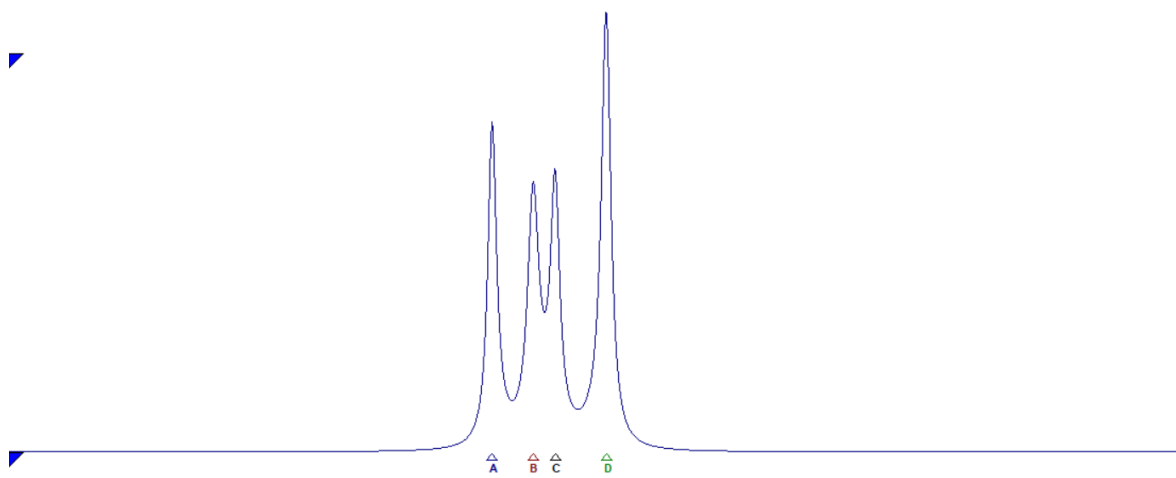

Peaks a-d:  $k = 6.8 \text{ s}^{-1}$  (simulating the spectrum recorded at 233 K)

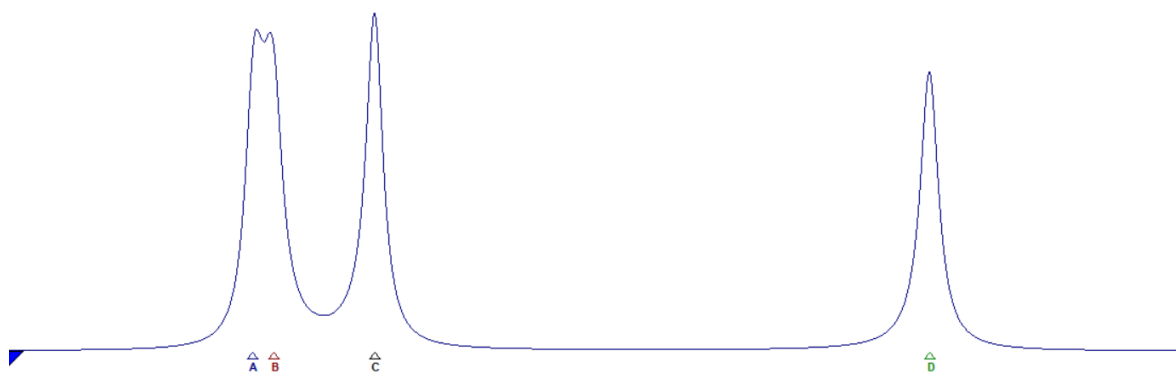

Peaks e-h:  $k = 2.8 \text{ s}^{-1}$  (simulating the spectrum recorded at 233 K)

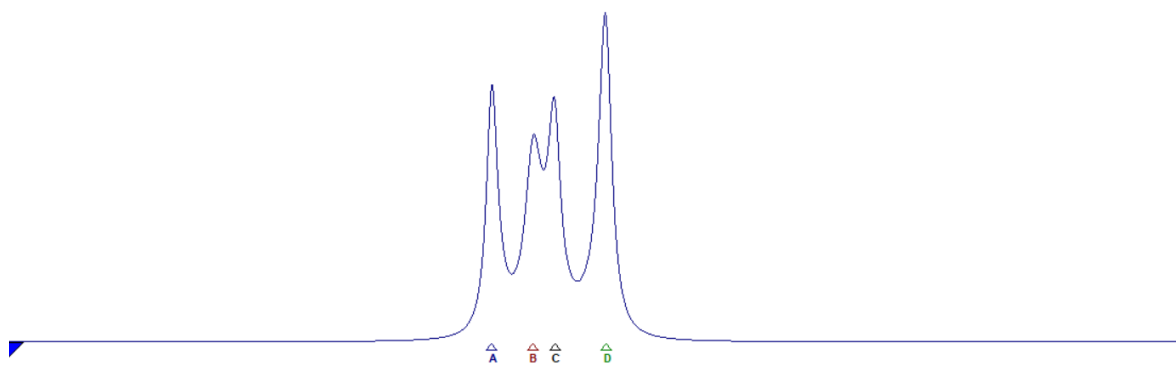

Peaks a-d:  $k = 8.8 \text{ s}^{-1}$  (simulating the spectrum recorded at 243 K)

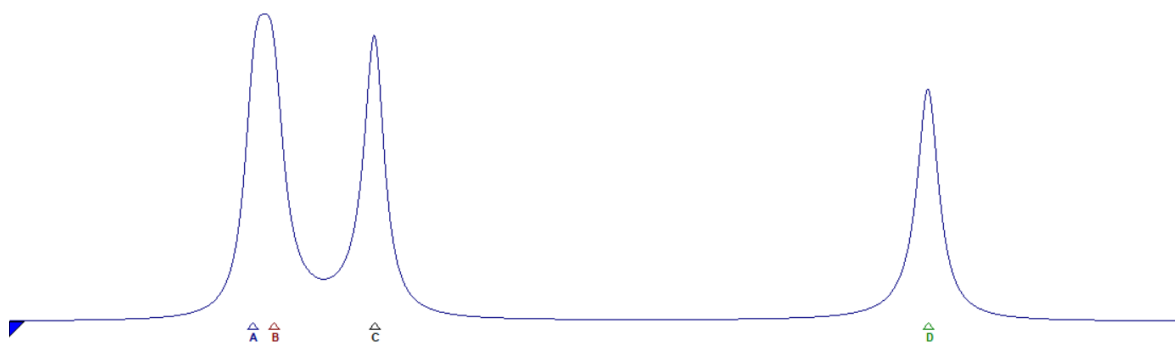

Peaks e-h:  $k = 4.4 \text{ s}^{-1}$  (simulating the spectrum recorded at 243 K)

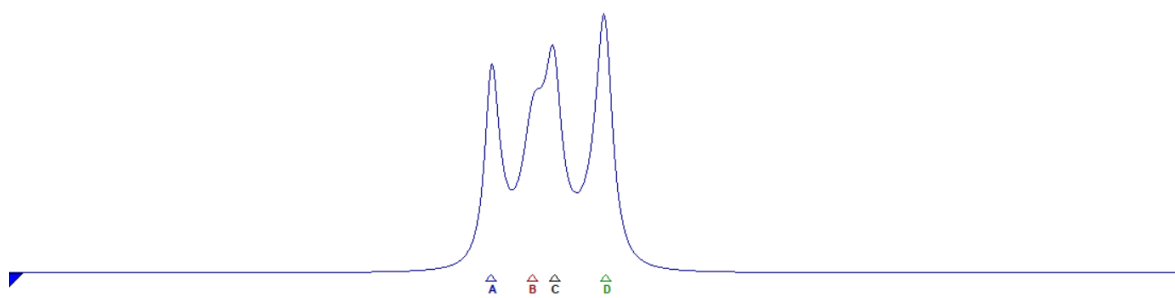

Peaks a-d:  $k = 13.0 \text{ s}^{-1}$  (simulating the spectrum recorded at 253 K)

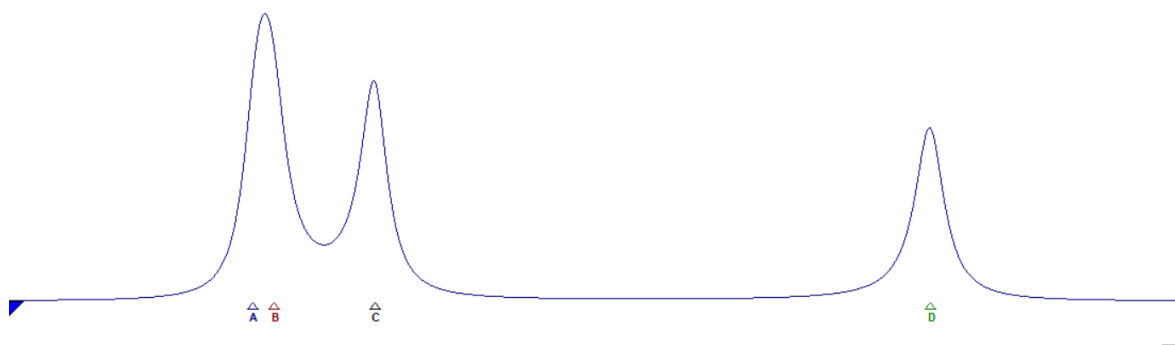

Peaks e-h:  $k = 6.0 \text{ s}^{-1}$  (simulating the spectrum recorded at 253 K)

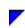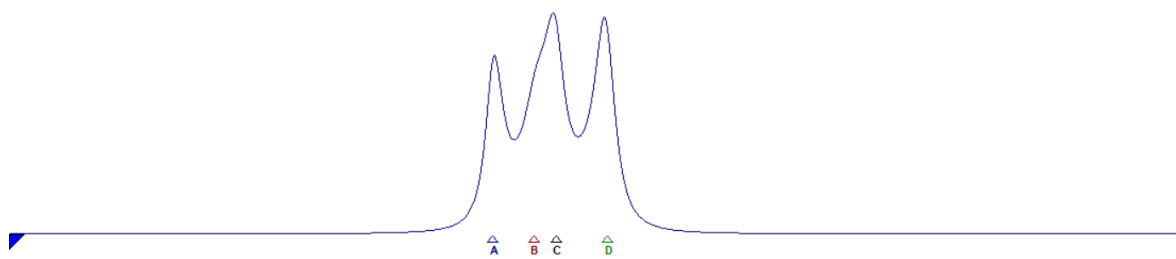

Peaks a-d:  $k = 18.0 \text{ s}^{-1}$  (simulating the spectrum recorded at 263 K)

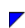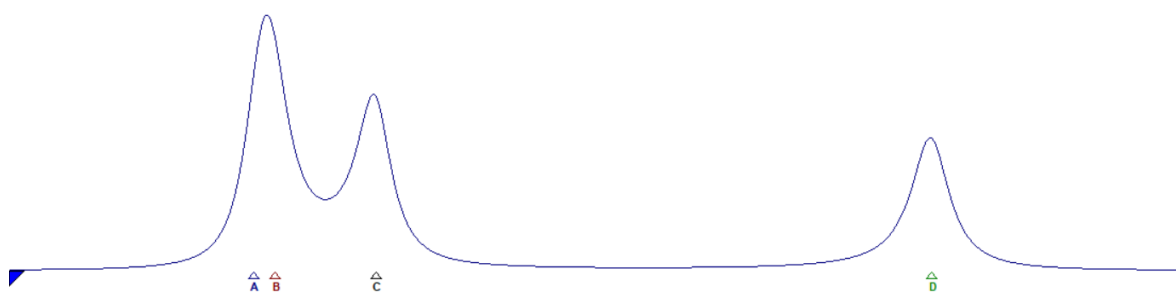

Peaks e-h:  $k = 9.1 \text{ s}^{-1}$  (simulating the spectrum recorded at 263 K)

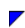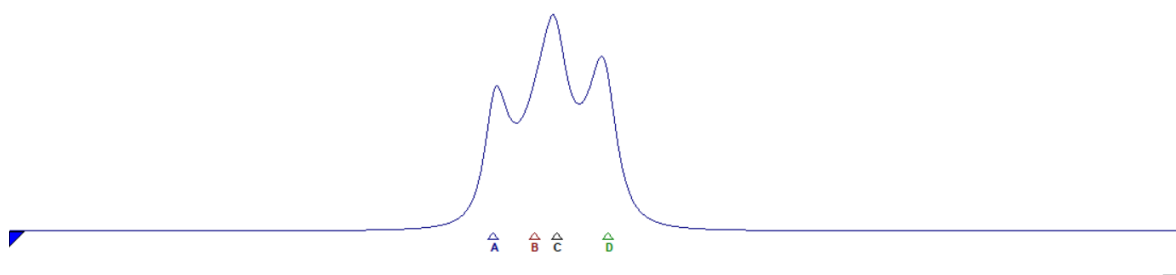

Peaks a-d:  $k = 25.0 \text{ s}^{-1}$  (simulating the spectrum recorded at 273 K)

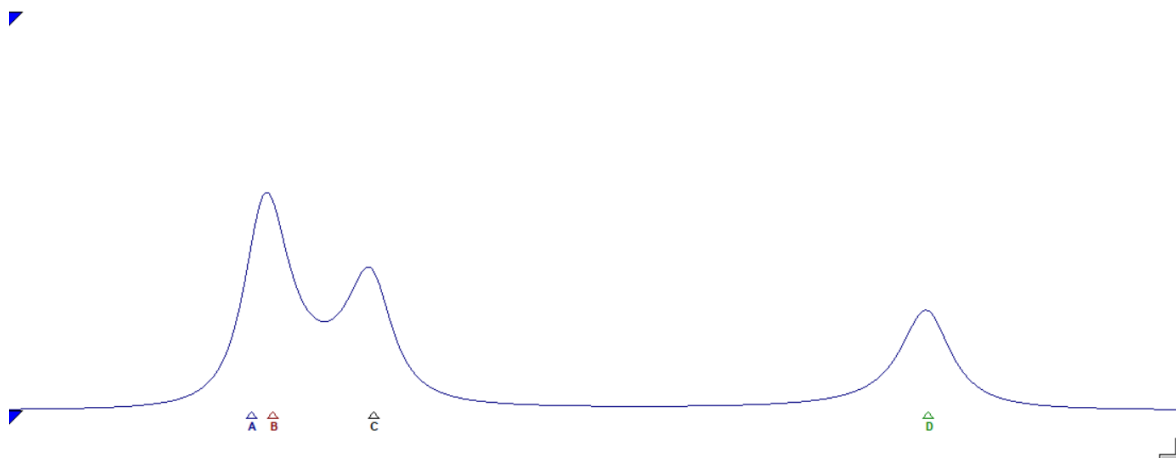

Peaks e-h:  $k = 12.2 \text{ s}^{-1}$  (simulating the spectrum recorded at 273 K)

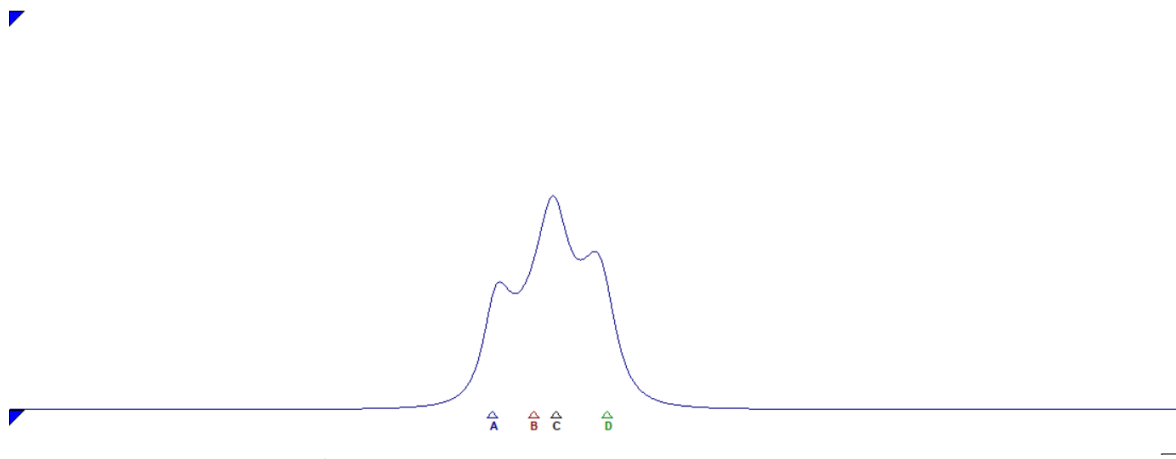

Peaks a-d:  $k = 34.3 \text{ s}^{-1}$  (simulating the spectrum recorded at 283 K)

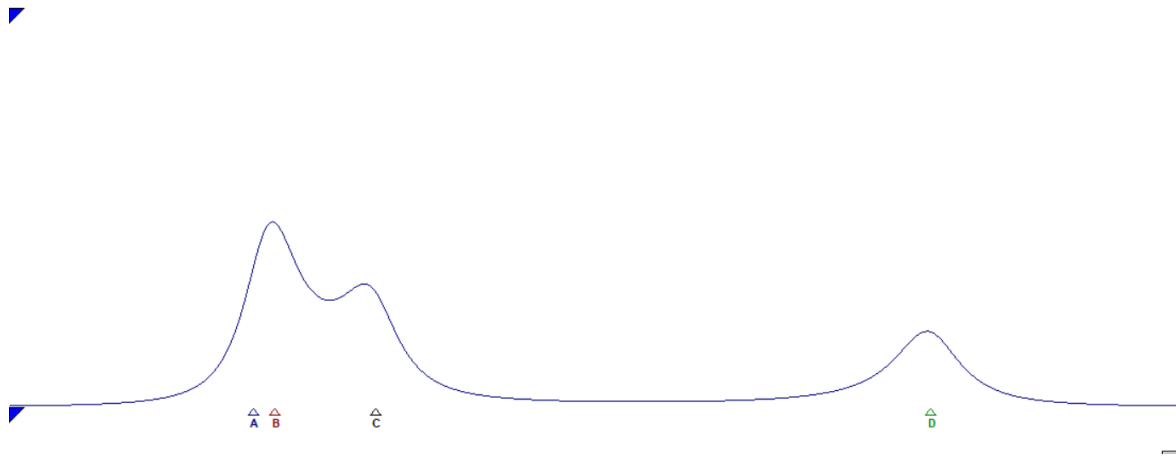

Peaks e-h:  $k = 15.9 \text{ s}^{-1}$  (simulating the spectrum recorded at 283 K)

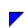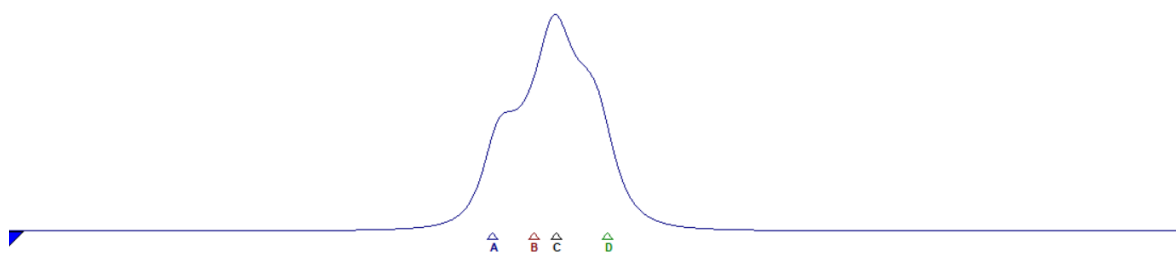

Peaks a-d:  $k = 40.1 \text{ s}^{-1}$  (simulating the spectrum recorded at 293 K)

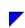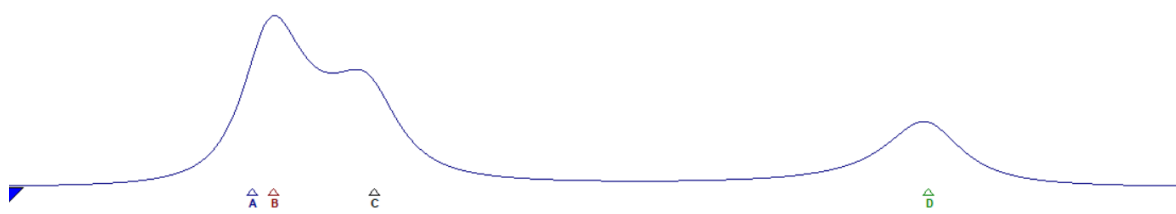

Peaks e-h:  $k = 18.5 \text{ s}^{-1}$  (simulating the spectrum recorded at 293 K)

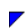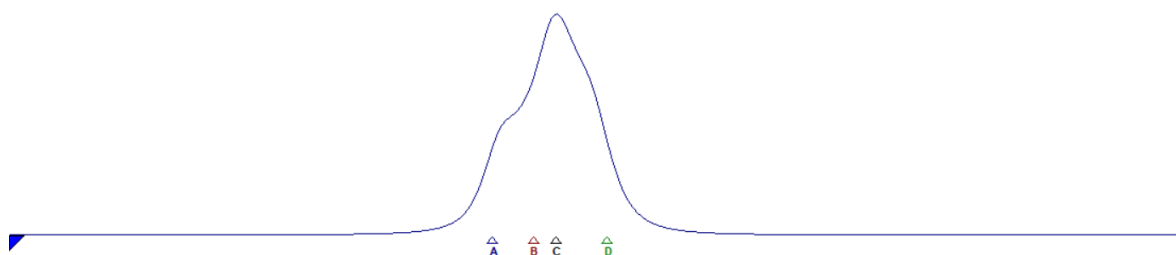

Peaks a-d:  $k = 48.1 \text{ s}^{-1}$  (simulating the spectrum recorded at 298 K)

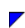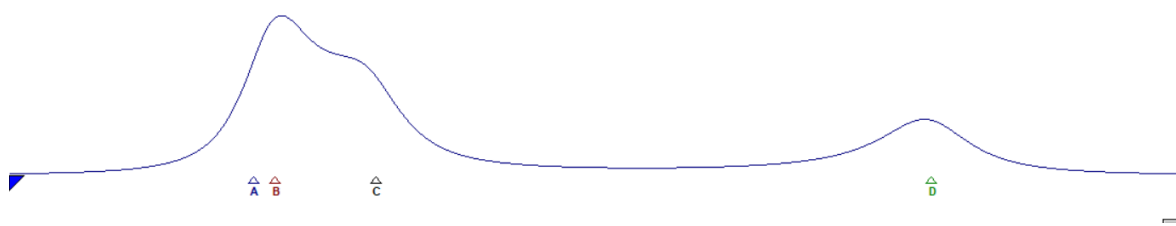

Peaks e-h:  $k = 25.7 \text{ s}^{-1}$  (simulating the spectrum recorded at 298 K)

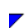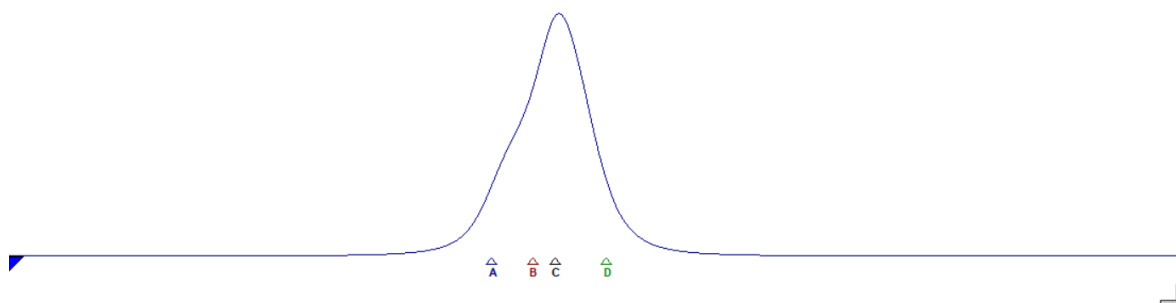

Peaks a-d:  $k = 55.4 \text{ s}^{-1}$  (simulating the spectrum recorded at 303 K)

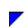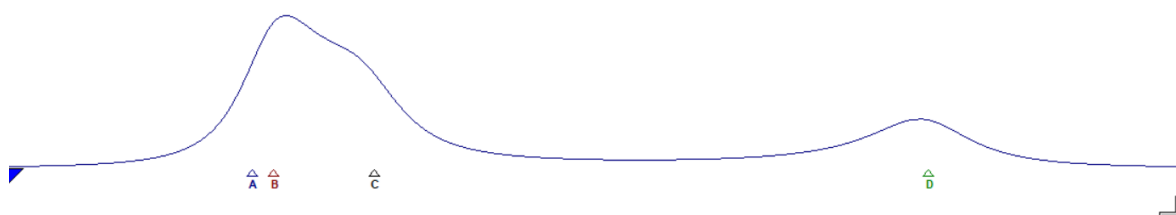

Peaks e-h:  $k = 29.3 \text{ s}^{-1}$  (simulating the spectrum recorded at 303 K)

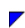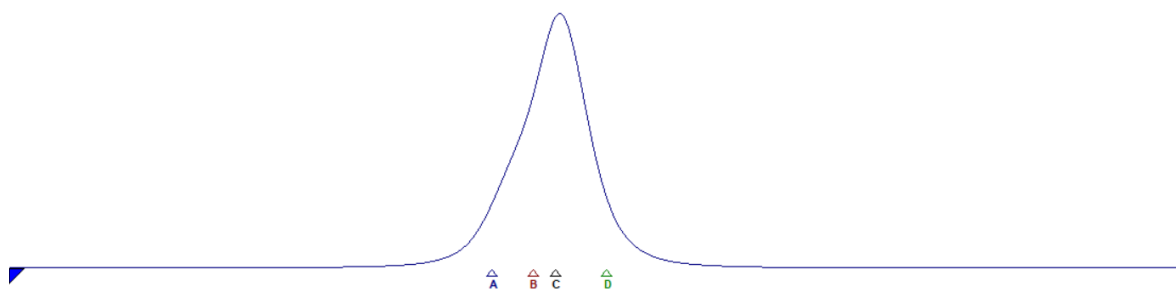

Peaks a-d:  $k = 77.4 \text{ s}^{-1}$  (simulating the spectrum recorded at 313 K)

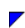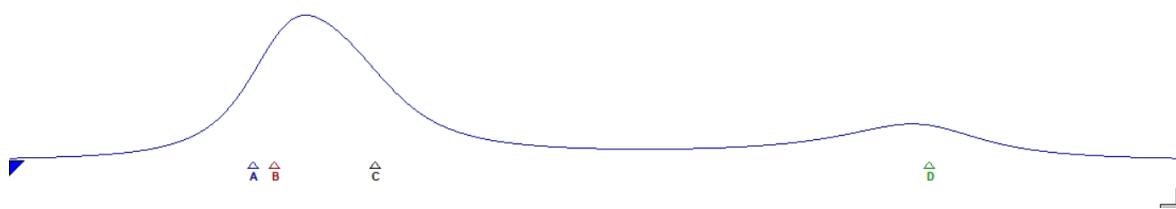

Peaks e-h:  $k = 41.0 \text{ s}^{-1}$  (simulating the spectrum recorded at 313 K)

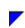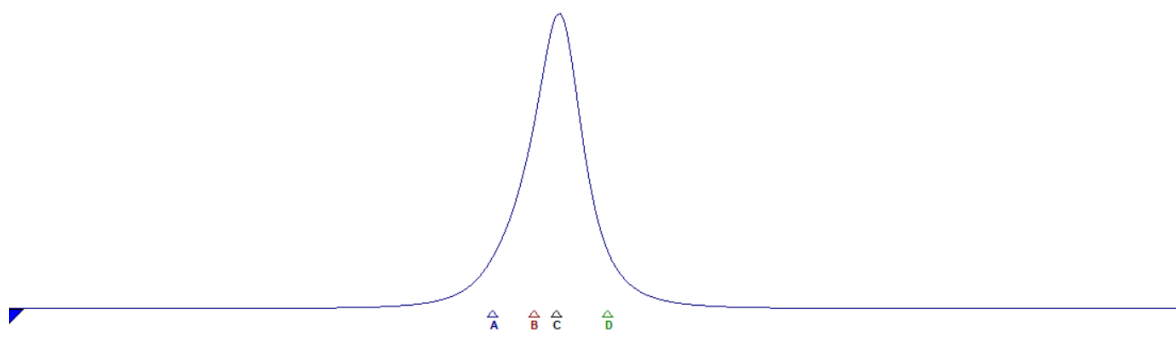



Peaks a-d:  $k = 104.4 \text{ s}^{-1}$  (simulating the spectrum recorded at 323 K)

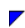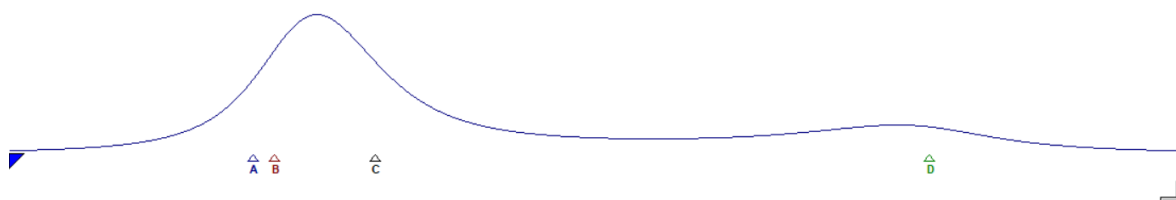

Peaks e-h:  $k = 52.6 \text{ s}^{-1}$  (simulating the spectrum recorded at 323 K)

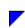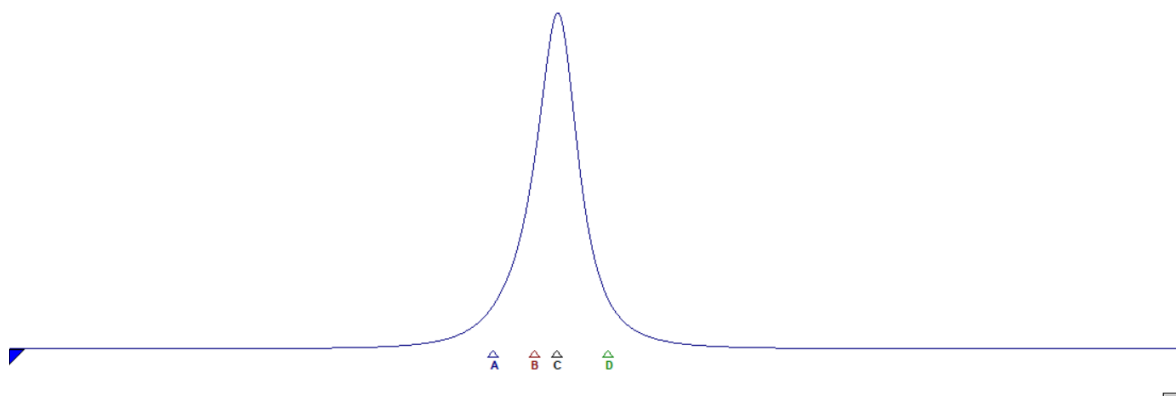

Peaks a-d:  $k = 117.4 \text{ s}^{-1}$  (simulating the spectrum recorded at 328 K)

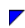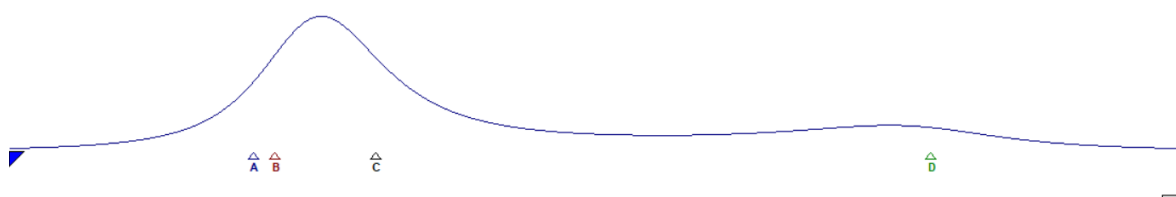

Peaks e-h:  $k = 58.8 \text{ s}^{-1}$  (simulating the spectrum recorded at 328 K)

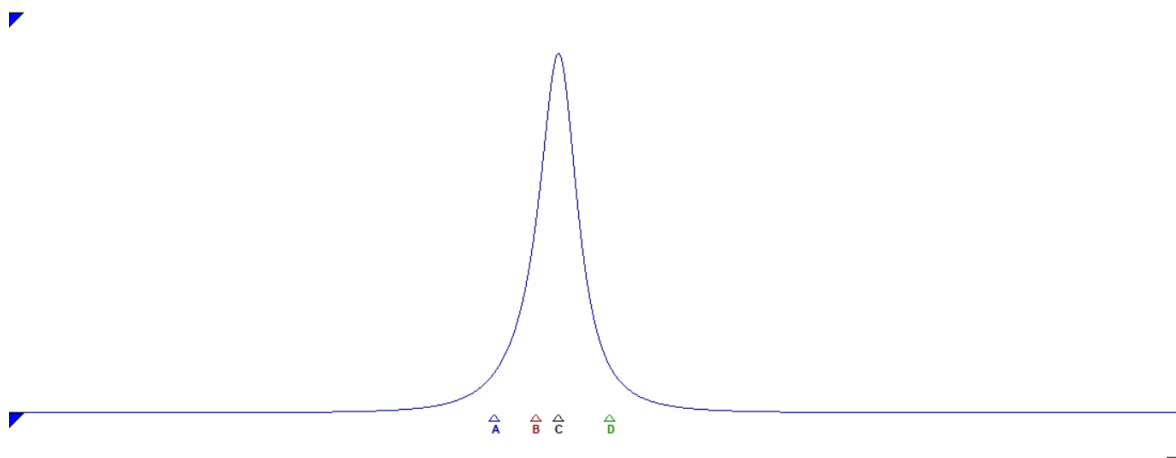

Plots of  $\ln(k.T^{-1})$  versus  $T^{-1}$  based on these simulated rate constants are given below and application of equations 3 and 4 allowed  $\Delta H^\ddagger$  and  $\Delta S^\ddagger$  to be determined as  $17.9 \pm 0.3 \text{ kJ mol}^{-1}$  and  $-155 \pm 1 \text{ J mol}^{-1}\text{K}^{-1}$ .

Plot based on peaks a-d

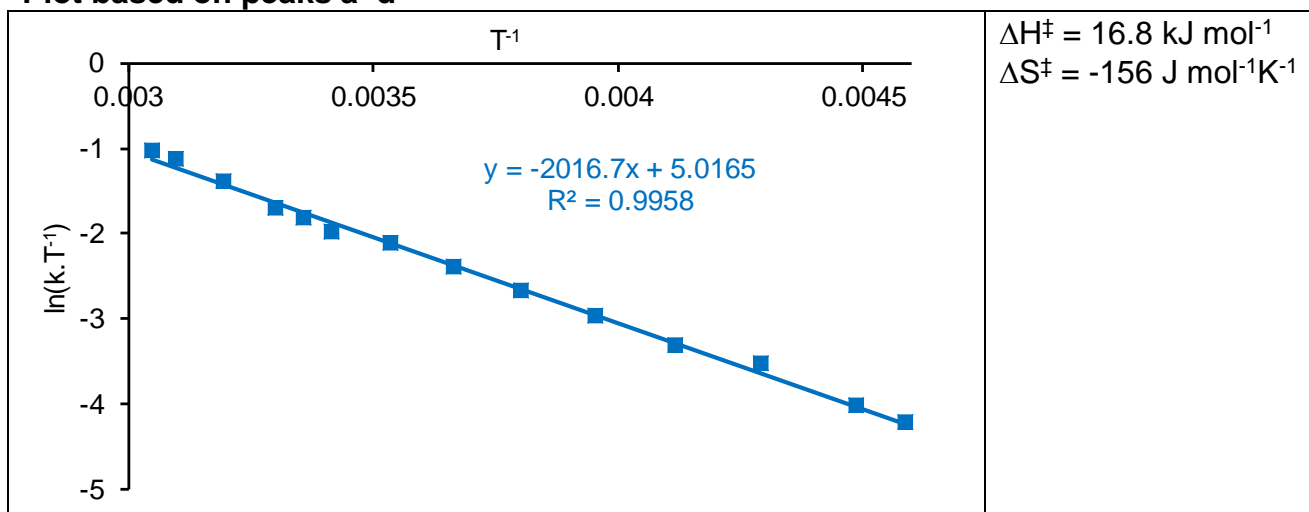

Plot based on peaks e-h

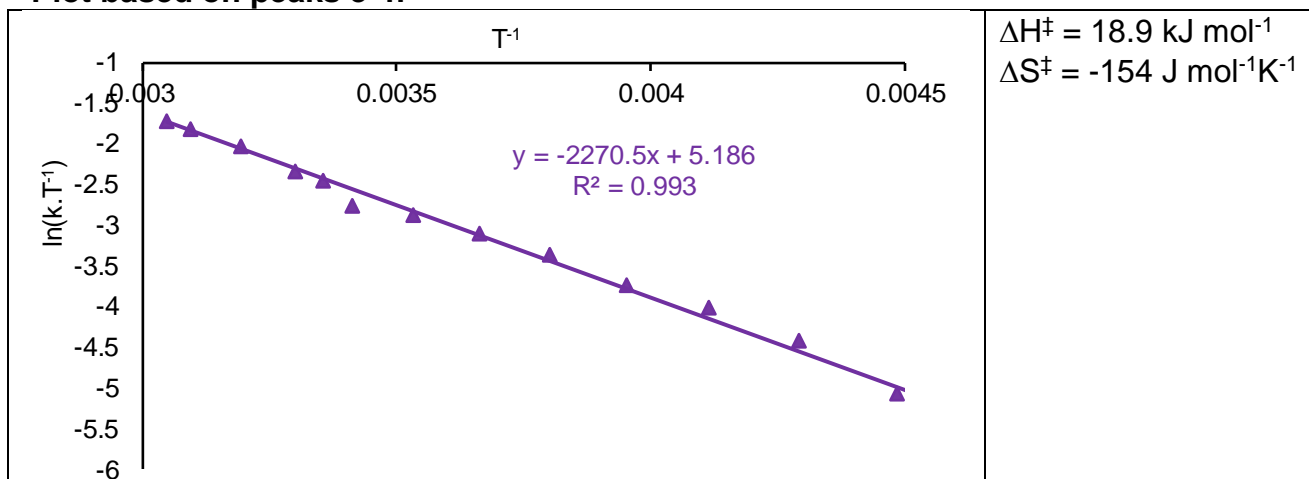

<sup>1</sup>H NMR spectrum of reaction mixture

**NMR spectra of styrene carbonate**

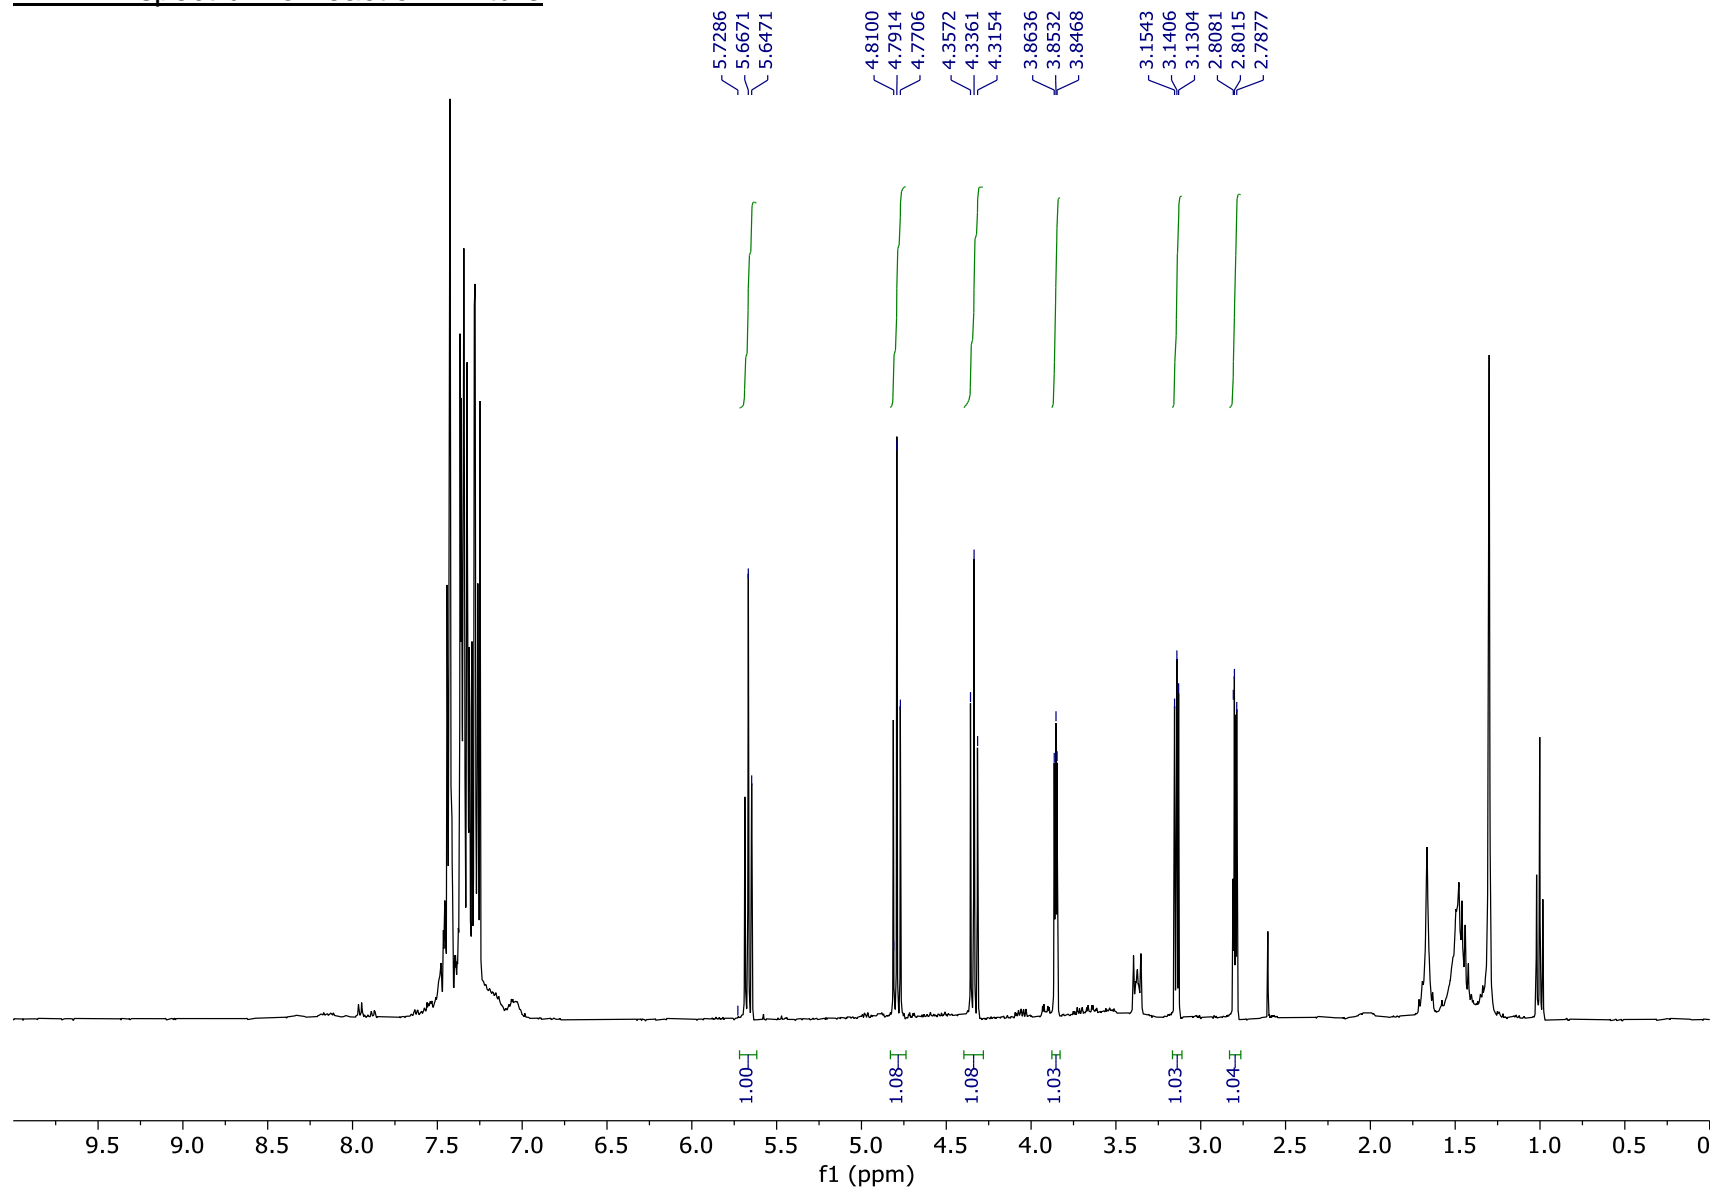

Peaks at 5.7, 4.8 and 4.3 ppm correspond to styrene carbonate.

Peaks at 3.9, 3.1 and 2.8 ppm correspond to styrene oxide.

The peaks at 3.3 and 1.5-0.8 ppm correspond to tetrabutyl ammonium bromide.

$^1\text{H}$  NMR spectrum of purified styrene carbonate

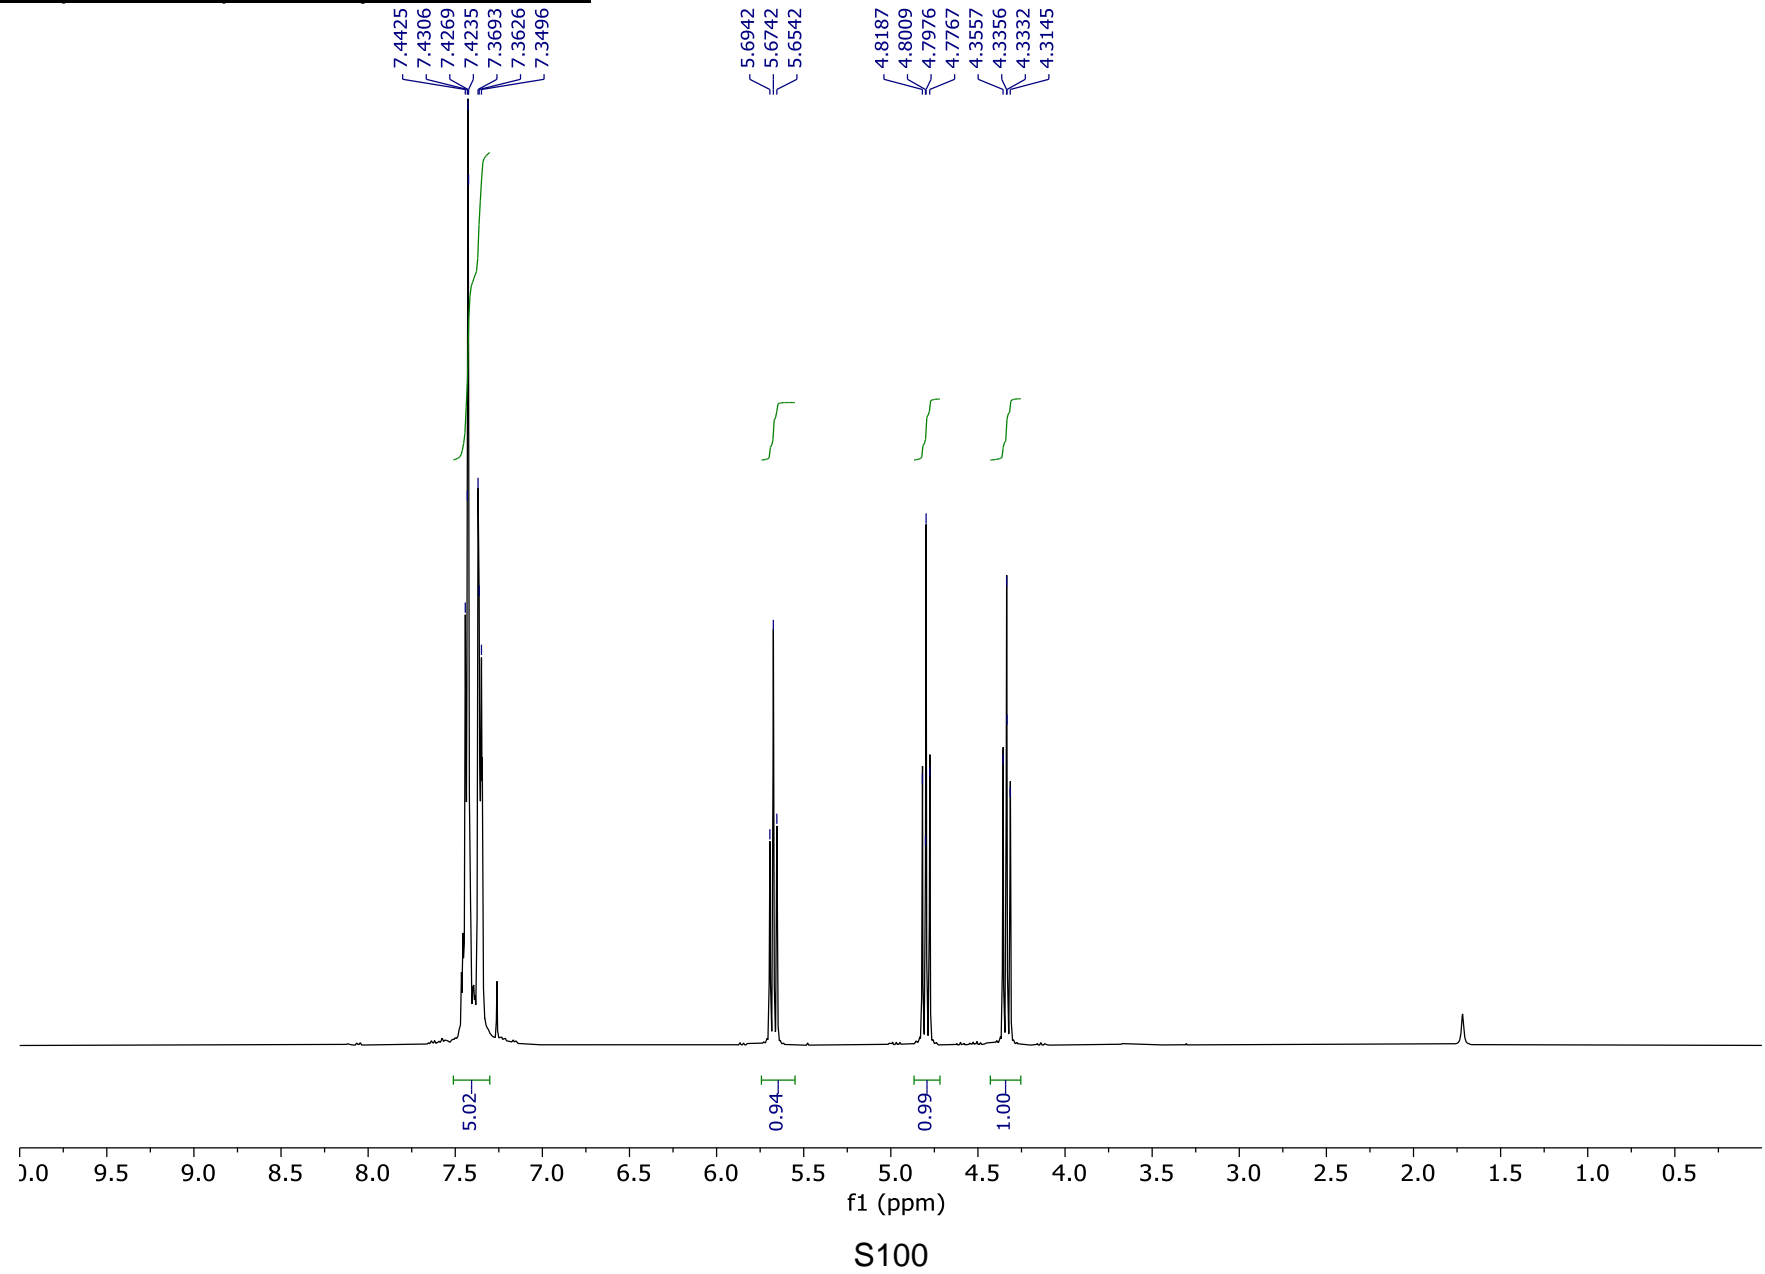

$^{13}\text{C}$  NMR spectrum of purified styrene carbonate

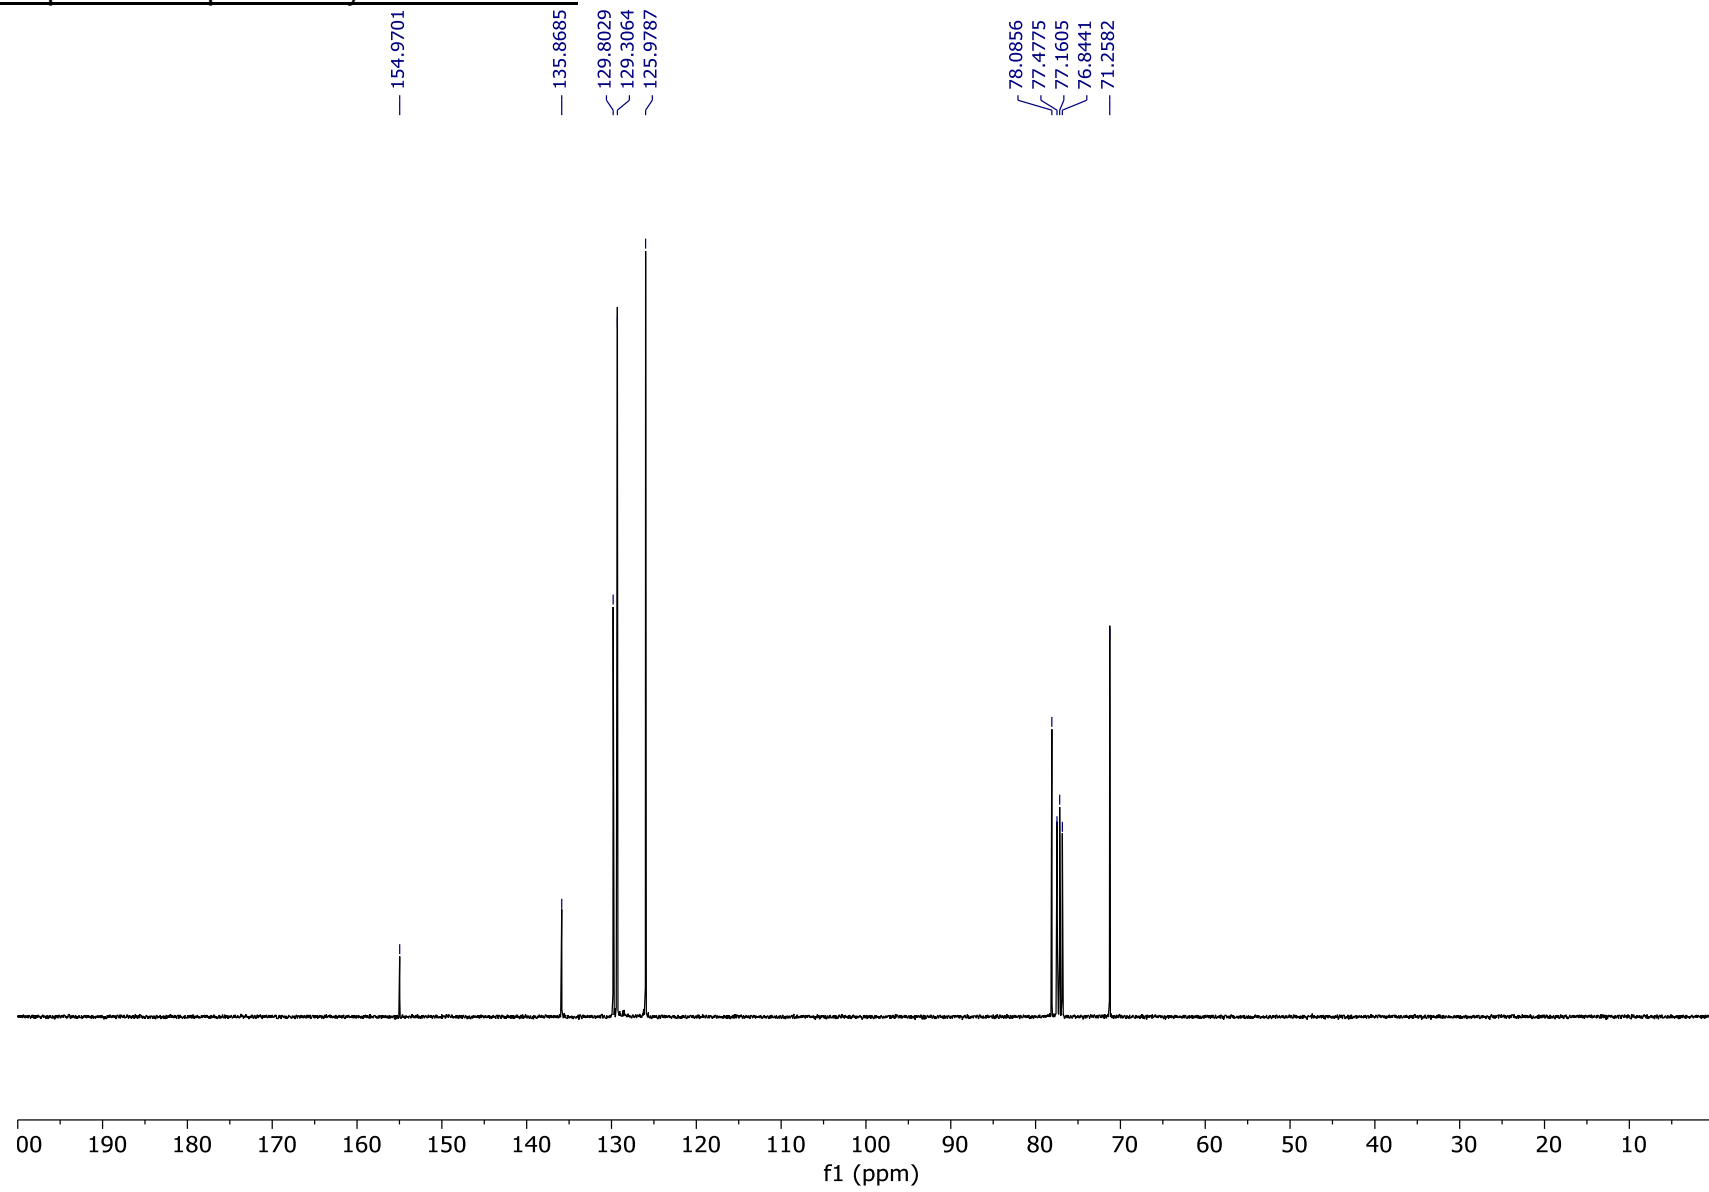

## Reference

1. WinDNMR-Pro was downloaded from:  
<https://www.chem.wisc.edu/areas/reich/plt/windnmr.htm> (accessed 7th January 2020).
